# Supplementary material for: Genome-Wide DNA Methylome and Transcriptome Analysis of Porcine Testicular Cells Infected With Transmissible Gastroenteritis Virus
Source: Front Vet Sci. 2022 Jan 13;8:779323. doi: 10.3389/fvets.2021.779323 (PMC8794705; doi:10.3389/fvets.2021.779323)
Supplement: Supplementary file 2 [file Table_2.XLSX]

## Sheet: Table S1
Table S1 Primer sequences used for qRT-PCR
Gene symbol	Forward (5'-3')	Reverse (5'-3')	Product length (bp)	Accession
REEP1	AGCAGAGACATTCACCGACA	TAAGGCACCTTGTCCCTTGG	283	XM_021087291.1
SGPP2	AGAACCGAAACGCCCTG	CCAATATACATCACCAGAACCCAT	199	XM_021074877.1
EGR1	CACCTGACCGCAGAGTCTTT	TTTGGCTGGGGTAACTCGTC	79	XM_003123974.6
WNT7A	CTATGTTGATTGCCCCGCCA	CGAGGAGAAGCCACCGATCC	162	XM_003132396.5
F2RL3	GATGACACCCAGACCCCCAT	GCCCTGGTGTGCAGTCATCA	79	XM_013994618.2
RGS4	TCCAGCAAACCAAAGAGGTAAAC	TCTTGGCATTTCCGCCCTC	292	NM_001185184.1
CPNE6	CCCAACTTTGAGGTGTCCCA	AGCCACTCGGTTGATGATGG	159	XM_021099221.1
BCL2A1	GAAAGCGAATTGCCCCAGAT	TTACAAAGCCATTTTCCCAGCC	123	NM_001164511.2
CTGF	CCCTGGCCGCTTACCGA	CACAGGTCTTGGAACAGGCA	108	NM_213833.2
EMILIN2	GCAGAATGTGGCAGAGGACAC	CGCGCACCAGTTCTTGTTCC	152	XM_021096135.1
SEP3	TTTGCCCTGCTTCGAGACTT	AAATATCAGACAGGCCGGAGG	138	XM_021091437.1
ALDOC	GCATCCGCAGCCTCATTTAG	GCATGGTGACAGTTCTGTGCG	128	NM_001243928.1
EGLN3	TGTTCTTCTGGTCAGACCGC	GCAGGCTCGGTTTTCCTAGT	148	XM_001928507.6
OVOL1	ACGGCTCCGGCTCTAGTTAC	GCCCAGGCTGACTGGTACG	166	XM_003122528.4
NEK6	TGCGAGCCGCCTGTG	CCTCGGCCGATCTTCTTCTC	199	XM_003122163.5
RIPOR3	GACTCGCTGGAGGGTGACAG	TCCTGTGGGTGGACTTTGTG	149	XM_005673005.3
SAMD11	TGGAGTACGCGGGGAAAAGT	GGGGAGGATATTCGACAGCC	100	XM_021095157.1
STC2	CTTGCAGAACACAGCGGAAA	GCCCCGAATCTCACAAGAGT	103	NM_001110173.1
SLC16A3	GCGCTCGGAGCCACAG	GCCTGTGGGGCTGCTCA	196	XM_021066366.1
LY75	GCCAGATTCCAAAAGGTCGT	TAAGTGGGGCTCAGCAACAA	125	NM_001184946.1
ZNF292	GGAAAGCCAAGCCAGGATCT	GTACGCACCCCGAGCG	149	XM_003121280.5
TGEV-N	CAATTCCCGTGGTCGGAAGA	TTTACGTTGGCCCTTCACCA	190	NC_038861
GAPDH	ACATCATCCCTGCTTCTACTGG	CTCGGACGCCTGCTTCAC	188	AF017079.1

## Sheet: Table S2
	Table S2 Statistics for RRBS data of all samples
Group	LibraryID	Sample name	Raw Reads	Raw Bases(G)	Clean Reads	Clean Bases(G)	Clean_ratio(%)	Q20(%)	Q30(%)	GC Content(%)	BS Conversion Rate(%)	Mapped reads	Mapping rate(%)
Control	FDBS202081569-1a	Nor_1	36160444	10.85	35196026	8.09	74.56	97.99	94.1	35.64	99.105	22986524	65.31
	FDBS202081570-1a	Nor_2	39958447	11.99	38752353	8.8	73.39	97.78	93.24	35.59	99.113	25223906	65.09
	FDBS202081571-1a	Nor_3	44116421	13.23	42798270	9.8	74.07	97.73	93.14	35.68	99.098	28058545	65.56
	FDBS202081572-1a	Nor_4	44392803	13.32	43065696	9.85	73.95	97.85	93.42	35.92	99.161	27863505	64.7
TGEV-infected	FDBS202081558-1a	Inf_1	40900567	12.27	39829396	9.65	78.65	98.03	94.09	34.74	99.119	26829081	67.36
	FDBS202081559-1a	Inf_2	44952267	13.49	43747589	10.03	74.35	97.83	93.34	35.61	99.067	28212820	64.49
	FDBS202081560-1a	Inf_3	45806108	13.74	44695389	10.38	75.55	98.04	94.05	35.54	99.118	29163741	65.25
	FDBS202081561-1a	Inf_4	46083075	13.82	44717970	10.22	73.95	98.11	94.26	35.57	99.11	29129285	65.14

## Sheet: Table S3
	Table S3 Sequencing depth of cytosine methylation in CG, CHG, and CHH sites
Group	Sample name	C_covgMean	C(Mb)	CG(Mb)	CHG(Mb)	CHH(Mb)	meanC(%)	MeanCG(%)	MeanCHG(%)	MeanCHH(%)
Control	Nor_1	14.7	897.2	173	241.1	483	10.32	48.96	1.33	0.96
	Nor_2	15.9	971.2	188.5	260.6	522.1	10.21	48.15	1.33	0.95
	Nor_3	17.8	1088.3	211.3	292.6	584.5	10.4	48.96	1.36	0.98
	Nor_4	17.6	1079.6	212.9	291	575.7	10.4	48.5	1.27	0.92
TGEV-infected	Inf_1	18.1	1106.5	204.5	294.5	607.5	9.93	49.05	1.3	0.94
	Inf_2	17.7	1084.7	210.5	291.9	582.4	10.54	49.58	1.41	1.01
	Inf_3	18.6	1137.1	219.7	305.8	611.7	10.36	49.13	1.33	0.95
	Inf_4	18.3	1119.9	217	300.7	602.1	10.34	48.86	1.33	0.95

## Sheet: Table S4
Table S4 List of DMRs
Chromosome	Start	End	Length	nCG	Treated_meanMethy	Control_meanMethy	diff.Methy	areaStat
NC_010443.5	198953	199021	69	13	0.764487	0.848532	-0.0840452	-66.5731
NC_010443.5	479324	479416	93	20	0.363677	0.266624	0.097053	129.86
NC_010443.5	827481	827532	52	9	0.826816	0.861296	-0.0344801	-29.9862
NC_010443.5	1301923	1301979	57	9	0.246524	0.399734	-0.15321	-38.6546
NC_010443.5	1425619	1425716	98	11	0.26918	0.383708	-0.114528	-48.4348
NC_010443.5	1548015	1548068	54	13	0.73109	0.603612	0.127479	51.2361
NC_010443.5	1906426	1906546	121	22	0.03352	0.132709	-0.099189	-140.362
NC_010443.5	2227964	2228086	123	13	0.325303	0.163054	0.162249	71.6438
NC_010443.5	2230652	2230715	64	13	0.570924	0.428292	0.142632	59.8054
NC_010443.5	2231255	2231565	311	16	0.13863	0.3436	-0.20497	-120.341
NC_010443.5	2416450	2416545	96	12	0.409978	0.214887	0.195091	76.2997
NC_010443.5	2521620	2521675	56	4	0.390134	0.290147	0.099987	23.9333
NC_010443.5	2524919	2524987	69	13	0.386809	0.249908	0.136901	55.7525
NC_010443.5	2554467	2554531	65	16	0.489348	0.399382	0.0899664	71.2235
NC_010443.5	2600988	2601362	375	62	0.451849	0.609909	-0.15806	-409.333
NC_010443.5	8778819	8778900	82	10	0.327335	0.505389	-0.178054	-48.1586
NC_010443.5	8891772	8891900	129	31	0.699258	0.795845	-0.0965869	-155.954
NC_010443.5	9765836	9765887	52	14	0.553196	0.511283	0.0419126	72.8328
NC_010443.5	13340638	13340759	122	32	0.487851	0.371683	0.116169	198.386
NC_010443.5	15586459	15586562	104	10	0.378534	0.702898	-0.324364	-74.0787
NC_010443.5	18068449	18068513	65	7	0.299607	0.159406	0.140201	30.5413
NC_010443.5	18289280	18289330	51	10	0.259109	0.207291	0.0518179	68.6216
NC_010443.5	21304389	21304439	51	19	0.726771	0.640541	0.0862294	85.9558
NC_010443.5	21869574	21869743	170	16	0.396804	0.622049	-0.225245	-86.8987
NC_010443.5	22801761	22801834	74	16	0.812017	0.848228	-0.0362103	-90.5373
NC_010443.5	22801999	22802132	134	28	0.850006	0.762309	0.0876976	188.861
NC_010443.5	24219003	24219077	75	17	0.646328	0.748379	-0.102051	-62.1911
NC_010443.5	24287718	24287804	87	9	0.516727	0.642505	-0.125778	-38.4873
NC_010443.5	30934350	30934426	77	6	0.0908198	0.0418034	0.0490164	27.6724
NC_010443.5	33032152	33032255	104	14	0.553001	0.773932	-0.220931	-89.6962
NC_010443.5	33319467	33319536	70	9	0.0843565	0.189839	-0.105483	-39.2391
NC_010443.5	33694231	33694325	95	7	0.906586	0.667965	0.238622	42.8614
NC_010443.5	37760928	37761088	161	30	0.510168	0.381917	0.128251	238.393
NC_010443.5	46187319	46187393	75	6	0.533306	0.333299	0.200007	28.2851
NC_010443.5	52435560	52435660	101	36	0.202588	0.135814	0.0667741	252.869
NC_010443.5	52966492	52966639	148	9	0.303712	0.157349	0.146363	42.4553
NC_010443.5	53527960	53528034	75	8	0.391224	0.215379	0.175845	45.7012
NC_010443.5	55614727	55614808	82	14	0.573146	0.468861	0.104285	92.1881
NC_010443.5	60943029	60943231	203	47	0.549922	0.612109	-0.0621865	-231.954
NC_010443.5	68060285	68060403	119	24	0.555696	0.386287	0.16941	137.28
NC_010443.5	68378171	68378235	65	5	0.459169	0.821923	-0.362754	-33.3066
NC_010443.5	72998378	72998452	75	13	0.597431	0.475535	0.121896	53.8157
NC_010443.5	75522826	75522911	86	16	0.501643	0.564037	-0.0623946	-107.645
NC_010443.5	75523111	75523173	63	13	0.792638	0.732447	0.0601901	59.8992
NC_010443.5	76367471	76367534	64	20	0.0540594	0.101611	-0.0475515	-122.778
NC_010443.5	84544422	84544669	248	64	0.292348	0.389828	-0.0974804	-368.343
NC_010443.5	92418079	92418145	67	6	0.458781	0.661118	-0.202337	-31.4731
NC_010443.5	97612943	97613004	62	8	0.413764	0.327672	0.086092	55.9581
NC_010443.5	98015904	98015990	87	7	0.717513	0.494866	0.222647	33.9401
NC_010443.5	98433211	98433411	201	16	0.501333	0.617948	-0.116615	-84.954
NC_010443.5	99808987	99809038	52	9	0.169646	0.11866	0.0509861	36.6393
NC_010443.5	107219461	107219590	130	38	0.22286	0.171395	0.0514652	217.877
NC_010443.5	107897482	107897567	86	22	0.555715	0.453341	0.102374	107.094
NC_010443.5	109678983	109679196	214	47	0.0893714	0.13469	-0.0453187	-316.423
NC_010443.5	109921874	109922080	207	61	0.167848	0.0998169	0.0680311	366.417
NC_010443.5	109922434	109922485	52	15	0.777282	0.933097	-0.155815	-77.3239
NC_010443.5	118914803	118914889	87	12	0.616327	0.45075	0.165577	58.4038
NC_010443.5	120807371	120807449	79	24	0.176552	0.135814	0.0407381	134.155
NC_010443.5	121578920	121579198	279	60	0.510743	0.425669	0.0850742	376.55
NC_010443.5	124952842	124952916	75	8	0.166077	0.334886	-0.168809	-40.145
NC_010443.5	129673677	129673743	67	11	0.966491	0.900615	0.0658754	52.9061
NC_010443.5	130387924	130388154	231	35	0.185833	0.117466	0.0683671	209.793
NC_010443.5	131365926	131366064	139	24	0.117253	0.539242	-0.421989	-343.08
NC_010443.5	139494159	139494333	175	35	0.134243	0.0661951	0.0680481	236.346
NC_010443.5	139494602	139494759	158	23	0.106514	0.065431	0.0410833	111.837
NC_010443.5	144473313	144473412	100	16	0.130897	0.0801808	0.0507161	81.0963
NC_010443.5	146635716	146635808	93	8	0.339727	0.161016	0.178711	39.6434
NC_010443.5	163435705	163435913	209	84	0.0867842	0.0514959	0.0352884	511.551
NC_010443.5	168766325	168766383	59	7	0.527947	0.34144	0.186508	32.1605
NC_010443.5	181773237	181773304	68	5	0.545347	0.652943	-0.107596	-25.6856
NC_010443.5	186430406	186430465	60	7	0.0592333	0.0176379	0.0415954	26.7487
NC_010443.5	187713666	187713730	65	13	0.21247	0.381894	-0.169424	-63.3796
NC_010443.5	198992913	198992998	86	15	0.191938	0.28765	-0.0957119	-79.8809
NC_010443.5	207836239	207836301	63	23	0.108448	0.0755933	0.0328549	116.121
NC_010443.5	216763767	216763900	134	7	0.0795205	0.304034	-0.224513	-40.9881
NC_010443.5	217288038	217288204	167	14	0.381779	0.225895	0.155884	110.042
NC_010443.5	221491854	221492015	162	26	0.172752	0.107019	0.0657334	149.203
NC_010443.5	221578479	221578587	109	12	0.19333	0.29821	-0.10488	-61.9625
NC_010443.5	222038626	222038865	240	44	0.297672	0.215509	0.0821625	249.689
NC_010443.5	222658414	222658556	143	41	0.151253	0.098251	0.0530021	194.551
NC_010443.5	222658852	222658980	129	24	0.12196	0.216745	-0.0947849	-165.742
NC_010443.5	238511254	238511389	136	12	0.232766	0.150508	0.0822578	57.6843
NC_010443.5	240595738	240595852	115	21	0.125287	0.0615388	0.063748	112.388
NC_010443.5	242215553	242215752	200	34	0.383943	0.240843	0.1431	245.233
NC_010443.5	246347928	246348165	238	54	0.226879	0.136306	0.0905726	391.484
NC_010443.5	248610142	248610208	67	16	0.212844	0.305389	-0.0925453	-85.6144
NC_010443.5	250291734	250291852	119	13	0.750897	0.619293	0.131604	73.2428
NC_010443.5	250368549	250368668	120	29	0.25087	0.183637	0.0672327	142.398
NC_010443.5	250368921	250368981	61	28	0.282991	0.226144	0.0568468	165.63
NC_010443.5	254770561	254770660	100	23	0.107485	0.0575636	0.0499219	127.454
NC_010443.5	254856062	254856187	126	11	0.816289	0.709619	0.10667	51.1192
NC_010443.5	261727619	261727701	83	7	0.41343	0.272449	0.14098	34.0851
NC_010443.5	263904658	263904743	86	10	0.825478	0.547286	0.278192	65.0577
NC_010443.5	265117369	265117450	82	6	0.272251	0.143116	0.129135	28.0452
NC_010443.5	267773063	267773206	144	25	0.694387	0.534705	0.159682	132.029
NC_010443.5	267798166	267798240	75	10	0.225535	0.111198	0.114337	47.1752
NC_010443.5	268382976	268383077	102	4	0.203961	0.0883838	0.115577	21.5401
NC_010443.5	268439114	268439270	157	9	0.930399	0.637088	0.293311	57.5011
NC_010443.5	268589494	268589659	166	23	0.659746	0.581969	0.0777764	95.2346
NC_010443.5	269069347	269069424	78	25	0.752984	0.854352	-0.101369	-142.127
NC_010443.5	269307595	269307751	157	20	0.941986	0.806494	0.135492	106.275
NC_010443.5	269834478	269834553	76	14	0.261875	0.0484594	0.213415	203.109
NC_010443.5	270021704	270021757	54	5	0.875662	0.812083	0.063579	21.9705
NC_010443.5	270262718	270262794	77	7	0.420881	0.248813	0.172068	35.9307
NC_010443.5	270739122	270739194	73	19	0.0551447	0.0212848	0.0338599	93.9246
NC_010443.5	270739255	270739518	264	80	0.113825	0.065301	0.0485245	517.774
NC_010443.5	270912363	270912428	66	7	0.678906	0.479653	0.199253	32.3417
NC_010443.5	270946369	270946467	99	22	0.219408	0.152849	0.066559	103.24
NC_010443.5	271473955	271474135	181	29	0.667625	0.558482	0.109143	176.144
NC_010443.5	272015934	272015992	59	6	0.197856	0.092808	0.105048	27.6797
NC_010443.5	273122634	273122754	121	9	0.63675	0.43935	0.1974	47.0803
NC_010443.5	273124445	273124641	197	36	0.0652314	0.120681	-0.0554491	-187.727
NC_010443.5	273393043	273393114	72	14	0.617571	0.491085	0.126487	66.7144
NC_010443.5	273393444	273393575	132	14	0.562199	0.776767	-0.214568	-99.1488
NC_010443.5	273398272	273398358	87	7	0.95359	0.789953	0.163637	34.8442
NC_010443.5	273828630	273828687	58	6	0.456693	0.603165	-0.146472	-30.3204
NC_010443.5	273975683	273975758	76	9	0.92491	0.822331	0.102579	40.5571
NC_010443.5	274129867	274129977	111	6	0.0575054	0.230882	-0.173376	-29.851
NC_010443.5	274226044	274226210	167	20	0.550076	0.353414	0.196662	114.081
NC_010444.4	323652	323749	98	22	0.133877	0.096125	0.0377524	106.583
NC_010444.4	669125	669320	196	22	0.167996	0.0754519	0.0925439	146.695
NC_010444.4	897173	897481	309	78	0.514638	0.451893	0.0627455	400.826
NC_010444.4	904803	904994	192	29	0.637783	0.4972	0.140583	173.655
NC_010444.4	934867	934918	52	13	0.831103	0.886583	-0.0554802	-62.2831
NC_010444.4	1180301	1180385	85	10	0.346906	0.202689	0.144217	55.3087
NC_010444.4	1273489	1273566	78	10	0.630526	0.564313	0.0662125	45.7086
NC_010444.4	1275118	1275205	88	9	0.461234	0.376021	0.0852128	34.6863
NC_010444.4	1287624	1287754	131	7	0.478	0.225538	0.252462	50.0709
NC_010444.4	1293723	1293820	98	14	0.61083	0.485679	0.125151	75.3405
NC_010444.4	1363341	1363403	63	12	0.455225	0.374221	0.0810047	65.9329
NC_010444.4	1366811	1366874	64	7	0.1206	0.0889199	0.0316804	49.0609
NC_010444.4	1374913	1374999	87	16	0.334312	0.259663	0.0746488	72.2957
NC_010444.4	1399638	1399688	51	5	0.146328	0.205066	-0.0587385	-23.3283
NC_010444.4	1405049	1405099	51	9	0.263991	0.200721	0.0632695	40.3109
NC_010444.4	1478462	1478562	101	16	0.697511	0.824011	-0.1265	-71.4911
NC_010444.4	1892334	1892407	74	10	0.0708918	0.248223	-0.177331	-52.7263
NC_010444.4	1987030	1987096	67	5	0.237701	0.35441	-0.116709	-27.3808
NC_010444.4	1992872	1992947	76	9	0.0668206	0.137333	-0.0705123	-35.3012
NC_010444.4	2254225	2254328	104	7	0.214133	0.150256	0.0638769	34.3981
NC_010444.4	2503893	2503951	59	19	0.0644101	0.215938	-0.151527	-123.026
NC_010444.4	2533867	2533970	104	14	0.778226	0.842904	-0.0646786	-61.6438
NC_010444.4	2706945	2707056	112	8	0.842848	0.601637	0.241211	41.1521
NC_010444.4	2720882	2721056	175	25	0.779836	0.649759	0.130077	149.51
NC_010444.4	2839149	2839248	100	9	0.776605	0.611547	0.165058	49.088
NC_010444.4	2908317	2908400	84	10	0.749178	0.573092	0.176086	53.8834
NC_010444.4	2991430	2991496	67	7	0.817215	0.708871	0.108343	34.1497
NC_010444.4	2998181	2998237	57	4	0.578753	0.333336	0.245416	19.3294
NC_010444.4	3129798	3129924	127	17	0.92661	0.78753	0.13908	89.2319
NC_010444.4	3364826	3364943	118	19	0.951481	0.872643	0.0788387	87.7436
NC_010444.4	3490004	3490126	123	24	0.326578	0.448226	-0.121648	-119.945
NC_010444.4	3935578	3935653	76	9	0.314077	0.177056	0.137021	36.3932
NC_010444.4	4671968	4672032	65	5	0.373229	0.625971	-0.252741	-25.1398
NC_010444.4	4886462	4886525	64	11	0.236378	0.166666	0.0697114	51.1839
NC_010444.4	4898497	4898566	70	22	0.0458022	0.11015	-0.064348	-116.225
NC_010444.4	4898696	4898901	206	55	0.133835	0.0847338	0.0491008	265.339
NC_010444.4	5075302	5075377	76	7	0.275471	0.212819	0.0626517	34.3145
NC_010444.4	5101070	5101127	58	6	0.360064	0.621261	-0.261197	-33.6019
NC_010444.4	5182395	5182477	83	7	0.388159	0.598377	-0.210218	-30.7288
NC_010444.4	5206300	5206357	58	5	0.710267	0.568061	0.142206	21.0498
NC_010444.4	5358296	5358469	174	34	0.512618	0.631349	-0.11873	-213.359
NC_010444.4	6092929	6093125	197	22	0.308063	0.2231	0.0849639	109.292
NC_010444.4	6117099	6117217	119	9	0.745774	0.863886	-0.118113	-47.484
NC_010444.4	6538445	6538845	401	78	0.209401	0.154034	0.0553679	444.487
NC_010444.4	6604687	6604880	194	23	0.458099	0.576443	-0.118345	-163.135
NC_010444.4	6662765	6662881	117	21	0.764627	0.884141	-0.119514	-127.824
NC_010444.4	6815659	6815712	54	10	0.203842	0.368531	-0.164689	-53.9951
NC_010444.4	7559246	7559323	78	12	0.191263	0.276718	-0.085455	-59.8885
NC_010444.4	8144524	8144751	228	27	0.152629	0.302083	-0.149454	-148.556
NC_010444.4	8904659	8904816	158	21	0.910561	0.785378	0.125183	125.048
NC_010444.4	9352453	9352554	102	21	0.170464	0.122192	0.0482715	90.3806
NC_010444.4	9681713	9681834	122	5	0.685398	0.381831	0.303567	28.4818
NC_010444.4	14933158	14933430	273	52	0.210376	0.144111	0.0662652	329.124
NC_010444.4	15616333	15616443	111	36	0.268185	0.357535	-0.0893505	-274.664
NC_010444.4	16550130	16550230	101	9	0.961442	0.865495	0.0959472	40.9091
NC_010444.4	17743194	17743248	55	5	0.611025	0.449601	0.161424	32.091
NC_010444.4	17744688	17744739	52	5	0.618671	0.411163	0.207508	22.5054
NC_010444.4	18392610	18392773	164	39	0.515328	0.612931	-0.0976033	-203.78
NC_010444.4	24811450	24811594	145	18	0.689367	0.586992	0.102375	86.7206
NC_010444.4	25035957	25036121	165	10	0.409627	0.241348	0.168279	55.171
NC_010444.4	27240698	27240764	67	7	0.621542	0.685852	-0.06431	-37.1843
NC_010444.4	28971334	28971412	79	13	0.620543	0.516039	0.104504	63.3451
NC_010444.4	28972630	28972826	197	14	0.116641	0.240812	-0.124171	-89.9678
NC_010444.4	28973368	28973460	93	19	0.175944	0.29745	-0.121506	-126.207
NC_010444.4	28975504	28975594	91	16	0.140961	0.0788236	0.0621374	82.3786
NC_010444.4	29702603	29702690	88	6	0.397888	0.1861	0.211788	28.9324
NC_010444.4	33210752	33210825	74	15	0.74089	0.608057	0.132833	77.1708
NC_010444.4	39051515	39051660	146	18	0.242443	0.558836	-0.316393	-177.358
NC_010444.4	39689537	39689644	108	6	0.105767	0.399888	-0.294121	-34.2863
NC_010444.4	41666816	41667034	219	53	0.270048	0.418603	-0.148554	-402.643
NC_010444.4	42081626	42081735	110	26	0.108439	0.131398	-0.0229599	-148.763
NC_010444.4	43949607	43949662	56	5	0.661108	0.531835	0.129273	22.8607
NC_010444.4	48263831	48263928	98	11	0.633078	0.475066	0.158012	57.8708
NC_010444.4	49082994	49083172	179	34	0.0766074	0.128454	-0.0518465	-236.492
NC_010444.4	51323173	51323327	155	33	0.103344	0.0703149	0.0330295	160.537
NC_010444.4	57335128	57335202	75	7	0.602506	0.394998	0.207508	34.0356
NC_010444.4	58617379	58617435	57	17	0.0903225	0.139271	-0.0489485	-91.8564
NC_010444.4	59221489	59221553	65	18	0.11429	0.0794251	0.0348652	80.4734
NC_010444.4	59363789	59364024	236	47	0.561388	0.400448	0.16094	392.59
NC_010444.4	59364127	59364253	127	24	0.512446	0.590073	-0.0776269	-153.494
NC_010444.4	61272300	61272769	470	96	0.310903	0.239522	0.0713812	547.838
NC_010444.4	65925409	65925522	114	19	0.957995	0.8838	0.0741942	88.4608
NC_010444.4	68789544	68789685	142	41	0.454176	0.541258	-0.0870815	-201.077
NC_010444.4	68807026	68807129	104	26	0.498334	0.384145	0.11419	129.278
NC_010444.4	69117898	69117976	79	17	0.12674	0.100781	0.0259595	85.2839
NC_010444.4	69235747	69235910	164	38	0.0777792	0.122298	-0.0445191	-240.426
NC_010444.4	69353678	69353802	125	23	0.383784	0.276576	0.107208	125.142
NC_010444.4	70047672	70047741	70	19	0.196193	0.132242	0.0639503	79.3056
NC_010444.4	70912627	70912706	80	25	0.220222	0.183945	0.0362763	115.145
NC_010444.4	71324197	71324255	59	9	0.449246	0.529375	-0.080129	-38.1172
NC_010444.4	71502726	71502834	109	9	0.212812	0.385935	-0.173123	-45.7336
NC_010444.4	72721645	72721780	136	14	0.406935	0.279166	0.127769	75.9377
NC_010444.4	73574893	73574977	85	24	0.161727	0.273781	-0.112054	-181.325
NC_010444.4	73917586	73917657	72	9	0.958732	0.928617	0.030115	41.5718
NC_010444.4	74601978	74602058	81	12	0.227132	0.0758064	0.151325	68.5482
NC_010444.4	74961201	74961268	68	17	0.0899647	0.130853	-0.0408884	-94.5123
NC_010444.4	75069493	75069692	200	22	0.478153	0.330067	0.148086	123.6
NC_010444.4	75256762	75256816	55	13	0.372521	0.43261	-0.0600893	-46.5199
NC_010444.4	75492847	75492898	52	5	0.153245	0.104052	0.049193	21.0775
NC_010444.4	75493349	75493455	107	15	0.223335	0.146485	0.0768497	74.1553
NC_010444.4	77156797	77156905	109	12	0.21217	0.124153	0.0880174	65.255
NC_010444.4	77515520	77515603	84	24	0.907857	0.832425	0.0754314	109.622
NC_010444.4	77730531	77730618	88	31	0.172288	0.237179	-0.0648915	-150.469
NC_010444.4	79766007	79766087	81	24	0.0674287	0.107008	-0.0395796	-122.791
NC_010444.4	79766842	79766908	67	5	0.368908	0.494375	-0.125467	-25.6201
NC_010444.4	80543629	80543694	66	18	0.51901	0.419518	0.0994922	124.52
NC_010444.4	81318092	81318143	52	25	0.392114	0.443027	-0.0509137	-129.226
NC_010444.4	82386544	82386641	98	27	0.671915	0.611616	0.0602984	94.3193
NC_010444.4	86724123	86724188	66	26	0.901516	0.834682	0.066834	112.85
NC_010444.4	89138221	89138325	105	17	0.883284	0.778172	0.105112	77.8897
NC_010444.4	96083861	96083921	61	21	0.20153	0.143863	0.0576672	112.528
NC_010444.4	100379957	100380033	77	14	0.519157	0.401529	0.117628	59.1063
NC_010444.4	105042338	105042528	191	26	0.190562	0.100315	0.0902467	156.522
NC_010444.4	110539302	110539475	174	10	0.293899	0.109532	0.184367	66.3721
NC_010444.4	116379925	116380032	108	8	0.680497	0.483816	0.19668	37.9534
NC_010444.4	119341762	119341874	113	19	0.462185	0.349721	0.112464	119.887
NC_010444.4	120688576	120688891	316	68	0.441834	0.33749	0.104344	550.248
NC_010444.4	126223707	126223771	65	6	0.439351	0.803974	-0.364623	-42.8139
NC_010444.4	130047423	130047484	62	8	0.776424	0.563599	0.212824	47.7074
NC_010444.4	134555904	134556046	143	44	0.252408	0.180054	0.0723537	264.045
NC_010444.4	135477324	135477410	87	15	0.839797	0.7254	0.114397	64.3317
NC_010444.4	136777982	136778220	239	44	0.841115	0.733698	0.107417	347.592
NC_010444.4	137207158	137207213	56	10	0.0604845	0.114183	-0.0536981	-53.097
NC_010444.4	137227141	137227212	72	13	0.159288	0.0926803	0.0666073	49.9933
NC_010444.4	139523316	139523388	73	29	0.516772	0.454502	0.0622698	131.209
NC_010444.4	140651711	140651800	90	5	0.0271842	0.119737	-0.0925523	-34.6817
NC_010444.4	141276092	141276175	84	8	0.390637	0.296847	0.09379	45.0668
NC_010444.4	141365829	141365890	62	10	0.120815	0.201305	-0.0804893	-47.1674
NC_010444.4	141469331	141469478	148	24	0.213141	0.120234	0.0929073	134.933
NC_010444.4	141487508	141487633	126	18	0.151816	0.0804603	0.0713555	104.044
NC_010444.4	141487840	141487931	92	19	0.114036	0.180561	-0.0665247	-90.6227
NC_010444.4	141984789	141984867	79	10	0.461141	0.288898	0.172243	58.8183
NC_010444.4	142960619	142960706	88	10	0.505094	0.306723	0.19837	57.7478
NC_010444.4	143056303	143056381	79	12	0.911051	0.766768	0.144283	56.1869
NC_010444.4	143498855	143499053	199	68	0.591929	0.464478	0.127452	597.264
NC_010444.4	143499231	143499673	443	52	0.584318	0.501048	0.0832701	295.522
NC_010444.4	144341748	144341930	183	26	0.504415	0.386244	0.118171	155.826
NC_010444.4	148234365	148234485	121	12	0.152778	0.344159	-0.191381	-61.6122
NC_010444.4	148365092	148365161	70	4	0.110628	0.318277	-0.207649	-18.4905
NC_010444.4	149900944	149901087	144	48	0.473138	0.397877	0.0752609	262.997
NC_010444.4	150220354	150220481	128	11	0.661729	0.441148	0.220581	60.7786
NC_010444.4	150603166	150603375	210	30	0.529081	0.377836	0.151245	220.504
NC_010444.4	150679043	150679196	154	48	0.391163	0.467599	-0.0764364	-242.024
NC_010444.4	150807983	150808057	75	11	0.41583	0.616289	-0.200458	-61.6216
NC_010444.4	151245454	151245602	149	26	0.181118	0.112667	0.0684506	167.232
NC_010444.4	151251266	151251354	89	12	0.650608	0.508558	0.14205	52.2473
NC_010444.4	151294480	151294541	62	6	0.257166	0.326622	-0.0694562	-36.7897
NC_010444.4	151418387	151418479	93	19	0.728361	0.571689	0.156672	91.6537
NC_010444.4	151595769	151595958	190	39	0.233596	0.162349	0.0712474	230.534
NC_010445.4	202132	202320	189	20	0.407628	0.556275	-0.148647	-117.921
NC_010445.4	253546	253597	52	4	0.322148	0.272352	0.0497961	23.6248
NC_010445.4	257846	257918	73	11	0.336525	0.245064	0.0914614	51.8832
NC_010445.4	325259	325341	83	14	0.238011	0.359082	-0.121072	-88.1679
NC_010445.4	596284	596391	108	18	0.206306	0.146809	0.0594964	88.5195
NC_010445.4	682845	683017	173	27	0.242138	0.163582	0.078556	188.393
NC_010445.4	804369	804637	269	62	0.908451	0.840302	0.068149	323.02
NC_010445.4	1004229	1004342	114	17	0.909601	0.840425	0.069176	70.3499
NC_010445.4	1373703	1373757	55	7	0.926502	0.871601	0.0549009	31.1787
NC_010445.4	1453380	1453457	78	4	0.954284	0.909856	0.0444282	16.0767
NC_010445.4	1640199	1640299	101	19	0.680284	0.589832	0.0904522	77.1219
NC_010445.4	1779445	1779510	66	9	0.510348	0.625635	-0.115287	-39.7176
NC_010445.4	1990012	1990068	57	5	0.588028	0.686288	-0.0982606	-28.1473
NC_010445.4	2137093	2137190	98	13	0.168939	0.300232	-0.131294	-66.8105
NC_010445.4	2465170	2465392	223	91	0.643072	0.728628	-0.0855562	-594.25
NC_010445.4	2465745	2465857	113	25	0.862953	0.959699	-0.0967464	-139.887
NC_010445.4	2813047	2813103	57	9	0.392535	0.298408	0.0941261	39.4198
NC_010445.4	3653563	3653614	52	11	0.270666	0.356198	-0.0855319	-47.4125
NC_010445.4	3666929	3667103	175	21	0.202459	0.124472	0.0779873	111.431
NC_010445.4	3992595	3992939	345	59	0.26048	0.202752	0.0577282	300.214
NC_010445.4	4000696	4000757	62	7	0.391794	0.329832	0.0619617	43.3143
NC_010445.4	4135777	4135967	191	35	0.0537942	0.119671	-0.0658771	-195.964
NC_010445.4	4136035	4136088	54	17	0.067502	0.114551	-0.0470488	-73.648
NC_010445.4	4671131	4671246	116	7	0.238049	0.38134	-0.14329	-31.5051
NC_010445.4	5567267	5567382	116	25	0.556604	0.450647	0.105957	129.155
NC_010445.4	5567666	5567924	259	85	0.572001	0.502029	0.0699721	636.106
NC_010445.4	5627502	5627579	78	14	0.325964	0.507576	-0.181611	-68.0104
NC_010445.4	6136834	6136933	100	13	0.0658326	0.0202801	0.0455525	64.9617
NC_010445.4	6618362	6618466	105	9	0.971793	0.850502	0.121291	42.1825
NC_010445.4	7837679	7837823	145	28	0.395671	0.479483	-0.0838118	-137.222
NC_010445.4	8170004	8170069	66	6	0.290976	0.11012	0.180855	28.5732
NC_010445.4	8363323	8363825	503	102	0.557701	0.410453	0.147249	856.929
NC_010445.4	8527466	8527607	142	36	0.142927	0.207437	-0.06451	-190.171
NC_010445.4	9389543	9389602	60	9	0.361131	0.203748	0.157384	39.1668
NC_010445.4	9449919	9450018	100	11	0.943499	0.869215	0.0742832	45.9725
NC_010445.4	9681254	9681461	208	6	0.47751	0.192007	0.285503	48.9263
NC_010445.4	10933958	10934030	73	18	0.524352	0.368251	0.156102	104.171
NC_010445.4	11365989	11366162	174	30	0.695992	0.786019	-0.0900265	-138.174
NC_010445.4	12376136	12376205	70	5	0.143656	0.362926	-0.21927	-22.2139
NC_010445.4	14637008	14637087	80	8	0.766997	0.567169	0.199827	39.5361
NC_010445.4	14701083	14701245	163	46	0.538989	0.464107	0.0748817	276.408
NC_010445.4	14701655	14701766	112	42	0.698283	0.626815	0.0714682	199.853
NC_010445.4	16631004	16631078	75	11	0.622301	0.462575	0.159725	60.5542
NC_010445.4	16783795	16783876	82	10	0.613931	0.407364	0.206566	54.5512
NC_010445.4	17093217	17093278	62	14	0.420224	0.631347	-0.211124	-78.2251
NC_010445.4	17358078	17358237	160	30	0.331646	0.208647	0.122999	179.836
NC_010445.4	18044115	18044166	52	4	0.135589	0.0956579	0.0399314	17.7376
NC_010445.4	18254541	18254604	64	20	0.11623	0.385245	-0.269015	-223.008
NC_010445.4	19509035	19509134	100	10	0.253409	0.0968119	0.156597	46.5773
NC_010445.4	19815651	19815774	124	10	0.0946609	0.0549012	0.0397597	42.2865
NC_010445.4	22549101	22549188	88	11	0.430433	0.373501	0.0569319	54.0219
NC_010445.4	23036278	23036443	166	23	0.253387	0.178003	0.0753843	121.675
NC_010445.4	23921912	23922009	98	8	0.928516	0.752125	0.176391	44.5043
NC_010445.4	25669056	25669204	149	5	0.0641885	0.390078	-0.325889	-27.6753
NC_010445.4	25884378	25884446	69	4	0.76151	0.958224	-0.196714	-20.6219
NC_010445.4	26249230	26249313	84	14	0.471357	0.327101	0.144257	69.4185
NC_010445.4	26447868	26448006	139	19	0.180305	0.123247	0.0570575	94.0554
NC_010445.4	27232642	27232760	119	10	0.166579	0.392885	-0.226306	-67.9933
NC_010445.4	27287016	27287120	105	9	0.277362	0.145245	0.132117	44.4335
NC_010445.4	27492213	27492444	232	26	0.470279	0.345023	0.125255	152.534
NC_010445.4	28709032	28709136	105	21	0.942842	0.844634	0.0982083	109.725
NC_010445.4	30272245	30272296	52	9	0.474692	0.532018	-0.0573262	-38.6579
NC_010445.4	30645345	30645399	55	9	0.0979544	0.169154	-0.0712	-36.0003
NC_010445.4	31043566	31043720	155	5	0.233079	0.611304	-0.378225	-27.5421
NC_010445.4	31941413	31941513	101	4	0.470637	0.155396	0.315241	22.0997
NC_010445.4	32749959	32750011	53	10	0.501834	0.450647	0.0511873	49.9721
NC_010445.4	33855000	33855137	138	14	0.46537	0.332011	0.133358	76.8673
NC_010445.4	37071504	37071607	104	16	0.520123	0.698545	-0.178422	-78.9819
NC_010445.4	37796617	37796670	54	7	0.899274	0.686668	0.212606	37.1051
NC_010445.4	38493110	38493288	179	22	0.941251	0.768606	0.172645	117.526
NC_010445.4	38699030	38699168	139	12	0.809812	0.629824	0.179988	75.8526
NC_010445.4	39001721	39001782	62	11	0.472758	0.381609	0.0911482	49.6601
NC_010445.4	39261577	39261816	240	29	0.347617	0.460236	-0.112619	-168.358
NC_010445.4	39323080	39323177	98	8	0.201268	0.447656	-0.246388	-45.5282
NC_010445.4	39978765	39978878	114	21	0.605333	0.7167	-0.111366	-92.7514
NC_010445.4	40024520	40024705	186	38	0.420047	0.266127	0.153921	309.894
NC_010445.4	40412026	40412093	68	6	0.950717	0.930261	0.0204562	25.1584
NC_010445.4	41063914	41063964	51	15	0.465529	0.347664	0.117865	64.5301
NC_010445.4	41082084	41082291	208	32	0.359463	0.258157	0.101306	235.348
NC_010445.4	41099581	41099705	125	58	0.772183	0.856638	-0.0844557	-441.243
NC_010445.4	41187507	41187597	91	13	0.191239	0.119341	0.071898	59.3903
NC_010445.4	41193108	41193269	162	27	0.942729	0.890189	0.0525402	119.398
NC_010445.4	41213042	41213208	167	29	0.96438	0.923362	0.0410178	120.076
NC_010445.4	42711086	42711171	86	8	0.236234	0.104445	0.13179	56.3421
NC_010445.4	44858505	44858687	183	31	0.448855	0.257986	0.190869	388.479
NC_010445.4	44901336	44901421	86	11	0.908671	0.798175	0.110496	51.1991
NC_010445.4	45913813	45913885	73	4	0.263145	0.601017	-0.337872	-19.2507
NC_010445.4	46111402	46111610	209	21	0.0382932	0.182694	-0.144401	-139.471
NC_010445.4	47052651	47052913	263	90	0.708544	0.620985	0.0875592	659.182
NC_010445.4	48715454	48715505	52	5	0.167712	0.300188	-0.132476	-22.1501
NC_010445.4	49046148	49046221	74	11	0.0602292	0.151545	-0.0913154	-47.1585
NC_010445.4	59110571	59110663	93	7	0.225681	0.0890488	0.136632	30.8059
NC_010445.4	59806608	59806750	143	46	0.589519	0.711144	-0.121625	-456.233
NC_010445.4	64417879	64417964	86	26	0.24839	0.177141	0.0712491	133.611
NC_010445.4	68534789	68534907	119	20	0.535462	0.444739	0.0907229	86.0312
NC_010445.4	68622891	68622997	107	5	0.958389	0.709797	0.248592	25.8259
NC_010445.4	71245812	71245904	93	15	0.181303	0.125293	0.0560093	64.12
NC_010445.4	71563564	71563620	57	16	0.867539	0.918803	-0.0512637	-79.1987
NC_010445.4	71621312	71621382	71	16	0.112631	0.0717445	0.0408866	79.3321
NC_010445.4	72379724	72379782	59	5	0.0784013	0.0554999	0.0229014	28.3518
NC_010445.4	75625179	75625296	118	23	0.434689	0.549175	-0.114485	-115.11
NC_010445.4	78362228	78362372	145	20	0.198047	0.128849	0.0691985	93.5624
NC_010445.4	86784748	86784908	161	21	0.868952	0.804426	0.0645262	85.1706
NC_010445.4	91964356	91964453	98	14	0.41128	0.518202	-0.106921	-71.3939
NC_010445.4	94254195	94254310	116	35	0.446184	0.371858	0.074326	161.621
NC_010445.4	97285279	97285393	115	9	0.782366	0.89272	-0.110354	-43.8159
NC_010445.4	100559511	100559635	125	15	0.462955	0.613435	-0.15048	-104.56
NC_010445.4	105860838	105860975	138	22	0.205686	0.297606	-0.0919203	-94.1265
NC_010445.4	108134193	108134537	345	54	0.508843	0.404099	0.104743	397.13
NC_010445.4	108223770	108223838	69	15	0.452244	0.501192	-0.0489473	-73.878
NC_010445.4	111286282	111286357	76	12	0.553882	0.383104	0.170778	65.9052
NC_010445.4	112252821	112253018	198	63	0.214775	0.175929	0.0388462	303.008
NC_010445.4	112380878	112381012	135	8	0.179458	0.429418	-0.24996	-43.9146
NC_010445.4	112816940	112817015	76	12	0.612982	0.541481	0.0715007	58.8014
NC_010445.4	113503801	113503968	168	37	0.362255	0.283552	0.0787031	217.23
NC_010445.4	113547562	113547652	91	7	0.579643	0.404693	0.17495	35.5105
NC_010445.4	115010103	115010180	78	14	0.835815	0.686715	0.1491	68.6717
NC_010445.4	119831006	119831084	79	10	0.142979	0.304728	-0.161749	-50.3917
NC_010445.4	120318184	120318281	98	12	0.0427835	0.164385	-0.121601	-58.8177
NC_010445.4	126197266	126197454	189	22	0.702056	0.530273	0.171783	125.681
NC_010445.4	126280452	126280508	57	10	0.196344	0.102612	0.0937314	48.4726
NC_010445.4	126429411	126429469	59	9	0.417945	0.514615	-0.0966698	-47.6912
NC_010445.4	126429709	126429967	259	68	0.417872	0.492497	-0.0746253	-419.35
NC_010445.4	126511592	126511664	73	16	0.642867	0.587803	0.0550641	94.3583
NC_010445.4	126980444	126980507	64	8	0.951002	0.91309	0.0379121	39.1796
NC_010445.4	127244966	127245071	106	14	0.179186	0.36455	-0.185365	-101.839
NC_010445.4	127508419	127508469	51	12	0.120872	0.175034	-0.0541623	-70.9084
NC_010445.4	127524510	127524576	67	16	0.498479	0.635159	-0.13668	-81.9266
NC_010445.4	127558311	127558424	114	19	0.305332	0.399131	-0.093799	-76.2797
NC_010445.4	128813201	128813265	65	8	0.720734	0.647211	0.073523	39.2869
NC_010445.4	128867022	128867234	213	59	0.174442	0.114309	0.0601331	475.714
NC_010445.4	128903535	128903848	314	93	0.515112	0.596312	-0.0812001	-647.169
NC_010445.4	128903964	128904028	65	13	0.567564	0.458447	0.109117	69.7746
NC_010445.4	129580296	129580354	59	4	0.184175	0.0840947	0.100081	20.8569
NC_010445.4	129832060	129832134	75	10	0.477719	0.302578	0.175142	46.9183
NC_010445.4	131284080	131284219	140	17	0.194083	0.131803	0.0622805	80.7894
NC_010445.4	131288411	131288537	127	14	0.731566	0.539143	0.192423	76.8356
NC_010445.4	132196961	132197017	57	7	0.154864	0.0973911	0.0574727	38.5689
NC_010445.4	132488470	132488659	190	19	0.12277	0.251372	-0.128602	-107.306
NC_010445.4	132812367	132812456	90	20	0.18892	0.133774	0.055146	93.6726
NC_010446.5	282299	282445	147	39	0.201648	0.158771	0.0428777	202.93
NC_010446.5	672021	672147	127	13	0.475609	0.319653	0.155956	70.15
NC_010446.5	698923	699033	111	11	0.657775	0.562713	0.0950617	64.4215
NC_010446.5	699291	699383	93	27	0.324705	0.222828	0.101877	176.82
NC_010446.5	699639	699884	246	50	0.670508	0.552501	0.118007	466.153
NC_010446.5	983593	983745	153	58	0.906627	0.876588	0.0300395	292.966
NC_010446.5	996366	996580	215	25	0.551445	0.380028	0.171416	190.075
NC_010446.5	1114542	1114607	66	9	0.270922	0.196812	0.0741106	42.2314
NC_010446.5	1236046	1236097	52	15	0.460753	0.395088	0.0656658	66.2693
NC_010446.5	1476451	1476507	57	7	0.268548	0.135199	0.133349	30.9805
NC_010446.5	1594276	1594382	107	21	0.449569	0.378341	0.0712285	87.5998
NC_010446.5	1597992	1598100	109	22	0.524944	0.385085	0.139859	135.092
NC_010446.5	1616755	1616812	58	9	0.234977	0.167993	0.0669842	38.9935
NC_010446.5	1735620	1735743	124	11	0.730216	0.557157	0.173059	50.3347
NC_010446.5	1756245	1756302	58	11	0.22266	0.151306	0.0713541	55.6849
NC_010446.5	1892436	1892496	61	20	0.205329	0.122668	0.0826605	105.806
NC_010446.5	2064428	2064531	104	13	0.167786	0.0870564	0.08073	56.2489
NC_010446.5	2073948	2074061	114	20	0.067483	0.142079	-0.0745958	-87.6567
NC_010446.5	2398226	2398289	64	4	0.588275	0.293798	0.294477	21.8073
NC_010446.5	2451895	2452017	123	20	0.505725	0.352544	0.153181	113.371
NC_010446.5	2515024	2515100	77	8	0.918957	0.757437	0.16152	36.4432
NC_010446.5	3258277	3258353	77	15	0.91872	0.830535	0.0881846	62.462
NC_010446.5	6354071	6354156	86	11	0.393711	0.57783	-0.184119	-55.9362
NC_010446.5	6933034	6933150	117	7	0.577613	0.751284	-0.173671	-32.0828
NC_010446.5	10236205	10236279	75	5	0.679602	0.363689	0.315912	25.139
NC_010446.5	14118382	14118465	84	4	0.27734	0.0677654	0.209575	24.2042
NC_010446.5	16355171	16355338	168	14	0.507702	0.316829	0.190873	97.7263
NC_010446.5	17584037	17584111	75	8	0.576648	0.331044	0.245604	42.357
NC_010446.5	27605824	27605882	59	5	0.139525	0.402584	-0.263059	-22.5963
NC_010446.5	32427949	32428049	101	4	0.0508354	0.242085	-0.191249	-17.863
NC_010446.5	33763343	33763417	75	8	0.510585	0.723184	-0.212599	-44.9124
NC_010446.5	38817136	38817190	55	11	0.232355	0.0774547	0.154901	74.7167
NC_010446.5	39411788	39411848	61	15	0.206017	0.308337	-0.10232	-66.8975
NC_010446.5	40473050	40473163	114	31	0.594752	0.681376	-0.0866238	-144.86
NC_010446.5	48587074	48587148	75	13	0.633681	0.475499	0.158182	57.629
NC_010446.5	59251834	59251978	145	15	0.106669	0.255868	-0.149199	-109.355
NC_010446.5	59582457	59582521	65	9	0.378625	0.451286	-0.0726616	-39.7494
NC_010446.5	61952790	61952847	58	5	0.807609	0.508567	0.299041	26.607
NC_010446.5	64154406	64154481	76	26	0.260132	0.179994	0.0801377	126.893
NC_010446.5	65440154	65440214	61	9	0.273828	0.0768731	0.196955	75.3924
NC_010446.5	66446603	66446663	61	7	0.082463	0.280974	-0.198511	-31.2177
NC_010446.5	69074305	69074419	115	11	0.0697565	0.123644	-0.0538875	-49.0918
NC_010446.5	71746100	71746188	89	14	0.0949645	0.212928	-0.117963	-67.9955
NC_010446.5	74675315	74675414	100	7	0.103408	0.0541511	0.0492567	32.2467
NC_010446.5	75135820	75135932	113	9	0.714084	0.589822	0.124262	34.8052
NC_010446.5	79216474	79216544	71	9	0.196239	0.364882	-0.168643	-42.0065
NC_010446.5	79562814	79563042	229	31	0.869384	0.763611	0.105773	181.158
NC_010446.5	83873807	83873868	62	9	0.541822	0.708757	-0.166934	-41.0852
NC_010446.5	84597291	84597475	185	56	0.696359	0.554714	0.141645	533.535
NC_010446.5	85497725	85497777	53	8	0.327166	0.555968	-0.228801	-40.362
NC_010446.5	89082383	89083039	657	40	0.369513	0.26773	0.101782	224.401
NC_010446.5	91321396	91321486	91	19	0.351617	0.476262	-0.124645	-89.2694
NC_010446.5	93252381	93252438	58	6	0.442433	0.168703	0.27373	34.2512
NC_010446.5	95973278	95973414	137	21	0.149464	0.22045	-0.0709864	-125.955
NC_010446.5	98041100	98041175	76	13	0.896495	0.804196	0.092299	56.2971
NC_010446.5	99380241	99380379	139	35	0.11587	0.0500503	0.06582	191.95
NC_010446.5	100442619	100442696	78	31	0.489249	0.436182	0.0530674	174.57
NC_010446.5	105845746	105845803	58	11	0.138585	0.2017	-0.063115	-46.5249
NC_010446.5	105954785	105954985	201	16	0.547553	0.329725	0.217827	114.133
NC_010446.5	106035398	106035519	122	9	0.300374	0.14342	0.156954	52.432
NC_010446.5	106425670	106425722	53	12	0.499114	0.600565	-0.101451	-68.8235
NC_010446.5	111647876	111648008	133	9	0.745024	0.502049	0.242975	50.7754
NC_010446.5	122100466	122100557	92	15	0.298265	0.240287	0.0579781	59.3348
NC_010446.5	123314786	123314918	133	13	0.336052	0.207695	0.128357	61.6381
NC_010446.5	123638204	123638376	173	34	0.0682757	0.154274	-0.0859983	-195.116
NC_010446.5	125110300	125110468	169	25	0.414196	0.630189	-0.215993	-260.29
NC_010446.5	125110629	125110767	139	36	0.424324	0.48666	-0.0623361	-162.694
NC_010446.5	125269644	125269698	55	6	0.761324	0.686719	0.0746046	28.5844
NC_010446.5	125286444	125286557	114	6	0.668756	0.881392	-0.212637	-30.4487
NC_010446.5	125646791	125646892	102	9	0.170025	0.10593	0.0640952	37.6751
NC_010446.5	126021527	126021623	97	6	0.313127	0.466147	-0.15302	-39.6075
NC_010446.5	127332651	127332705	55	4	0.314625	0.066923	0.247702	20.0185
NC_010446.5	127802575	127802635	61	10	0.578152	0.405387	0.172764	55.5117
NC_010446.5	128019347	128019399	53	8	0.758114	0.531485	0.22663	41.7707
NC_010446.5	128907395	128907448	54	7	0.409647	0.499915	-0.0902681	-42.1213
NC_010446.5	129038443	129038590	148	18	0.493323	0.676866	-0.183543	-92.7822
NC_010446.5	129078032	129078119	88	5	0.712729	0.369353	0.343376	35.9274
NC_010446.5	129802748	129802800	53	11	0.669232	0.554343	0.114889	52.989
NC_010446.5	130362022	130362195	174	31	0.870422	0.921062	-0.0506406	-148.492
NC_010446.5	130485086	130485175	90	34	0.44723	0.363767	0.0834627	146.453
NC_010447.5	430157	430215	59	11	0.139995	0.0797233	0.0602718	55.1717
NC_010447.5	439101	439310	210	37	0.349109	0.432072	-0.0829637	-164.221
NC_010447.5	1036142	1036196	55	4	0.181532	0.0946262	0.0869058	21.5534
NC_010447.5	1163716	1163796	81	16	0.142318	0.0736747	0.0686433	76.2072
NC_010447.5	1253351	1253525	175	21	0.260853	0.367576	-0.106723	-105.3
NC_010447.5	1254681	1254812	132	14	0.236417	0.361985	-0.125568	-60.542
NC_010447.5	1342269	1342355	87	10	0.188542	0.071358	0.117184	47.7566
NC_010447.5	1437601	1437675	75	12	0.350036	0.297972	0.0520639	55.8188
NC_010447.5	1547217	1547306	90	19	0.138368	0.189946	-0.0515781	-73.2313
NC_010447.5	1548123	1548176	54	11	0.185228	0.262691	-0.0774634	-44.8408
NC_010447.5	1768889	1768940	52	9	0.181779	0.114191	0.0675884	33.2585
NC_010447.5	1861098	1861148	51	5	0.2041	0.138566	0.0655339	22.2452
NC_010447.5	2418401	2418452	52	6	0.321078	0.462956	-0.141879	-29.537
NC_010447.5	3407041	3407197	157	23	0.790081	0.913539	-0.123458	-129.263
NC_010447.5	3854136	3854250	115	12	0.274482	0.181918	0.0925638	64.6923
NC_010447.5	3904111	3904172	62	6	0.475112	0.634653	-0.15954	-29.6609
NC_010447.5	3921293	3921414	122	5	0.387429	0.654289	-0.266861	-27.7578
NC_010447.5	3927560	3927624	65	7	0.323366	0.197618	0.125748	37.3614
NC_010447.5	3935066	3935148	83	11	0.64259	0.841801	-0.199211	-49.4891
NC_010447.5	4308967	4309109	143	22	0.686487	0.786729	-0.100242	-109.315
NC_010447.5	4544491	4544561	71	12	0.564926	0.376371	0.188554	54.8202
NC_010447.5	5323955	5324090	136	15	0.432873	0.312434	0.120438	80.3966
NC_010447.5	5339585	5339701	117	11	0.174358	0.307697	-0.133338	-53.5256
NC_010447.5	5599322	5599472	151	27	0.0596057	0.117906	-0.0583001	-127.005
NC_010447.5	5642591	5642729	139	18	0.728943	0.618682	0.110261	83.5677
NC_010447.5	5652314	5652420	107	18	0.697819	0.551108	0.146711	117.844
NC_010447.5	6654733	6654915	183	20	0.573678	0.451224	0.122454	95.3149
NC_010447.5	6715774	6715887	114	21	0.15142	0.0840401	0.0673798	106.59
NC_010447.5	7086313	7086380	68	24	0.122301	0.0822721	0.040029	175.018
NC_010447.5	7432083	7432277	195	35	0.631762	0.482922	0.14884	322.449
NC_010447.5	9582002	9582149	148	27	0.817676	0.708118	0.109558	143.081
NC_010447.5	10160567	10160645	79	10	0.22667	0.139173	0.0874968	52.9018
NC_010447.5	11066677	11066747	71	18	0.130735	0.231978	-0.101243	-108.82
NC_010447.5	11436353	11436505	153	10	0.526917	0.681862	-0.154945	-59.6627
NC_010447.5	11853806	11853887	82	12	0.916018	0.752856	0.163162	57.9712
NC_010447.5	13758514	13758722	209	28	0.346509	0.172663	0.173846	221.46
NC_010447.5	15260596	15260678	83	19	0.130545	0.0803105	0.0502344	110.907
NC_010447.5	15742362	15742481	120	15	0.2933	0.412625	-0.119324	-77.787
NC_010447.5	16014725	16014821	97	11	0.147889	0.098596	0.049293	47.0198
NC_010447.5	17194032	17194103	72	5	0.294955	0.482075	-0.187121	-25.3658
NC_010447.5	17434434	17434587	154	23	0.420006	0.319099	0.100908	100.733
NC_010447.5	17555566	17555626	61	15	0.0618197	0.106917	-0.045097	-97.985
NC_010447.5	17949204	17949254	51	5	0.514734	0.304698	0.210035	26.1861
NC_010447.5	19292186	19292500	315	51	0.480455	0.318907	0.161548	448.215
NC_010447.5	19763080	19763142	63	15	0.487507	0.387127	0.100381	75.75
NC_010447.5	22094459	22094558	100	4	0.553693	0.247263	0.30643	19.5492
NC_010447.5	22874949	22875151	203	44	0.458231	0.548521	-0.09029	-207.059
NC_010447.5	22875330	22875428	99	18	0.337785	0.460307	-0.122521	-119.859
NC_010447.5	30453002	30453115	114	11	0.124498	0.22136	-0.0968619	-49.7864
NC_010447.5	34758821	34758913	93	33	0.620895	0.537897	0.0829976	141.498
NC_010447.5	39915199	39915281	83	13	0.484639	0.693482	-0.208843	-83.7017
NC_010447.5	40099164	40099296	133	27	0.304007	0.217984	0.0860226	129.145
NC_010447.5	40131560	40131622	63	11	0.212036	0.35389	-0.141854	-52.6794
NC_010447.5	45239634	45239708	75	14	0.633135	0.457366	0.175769	77.4224
NC_010447.5	47609202	47609267	66	18	0.78855	0.733237	0.0553139	98.1371
NC_010447.5	49456815	49456883	69	12	0.222687	0.376735	-0.154049	-58.4827
NC_010447.5	52326426	52326500	75	8	0.49352	0.328433	0.165087	38.9605
NC_010447.5	53509902	53509977	76	8	0.366904	0.185384	0.18152	44.1942
NC_010447.5	60978227	60978441	215	32	0.627826	0.841133	-0.213307	-252.233
NC_010447.5	61104061	61104276	216	63	0.664387	0.773266	-0.108879	-448.406
NC_010447.5	62715356	62715418	63	9	0.203773	0.403286	-0.199513	-43.5529
NC_010447.5	63992444	63992553	110	26	0.0453122	0.101347	-0.0560346	-133.119
NC_010447.5	64182006	64182090	85	18	0.171134	0.10736	0.0637746	96.3513
NC_010447.5	64742182	64742248	67	9	0.265674	0.450684	-0.18501	-40.3336
NC_010447.5	65658094	65658166	73	5	0.13926	0.248227	-0.108966	-21.3087
NC_010447.5	66948939	66949026	88	12	0.615957	0.405402	0.210556	72.7779
NC_010447.5	67490854	67490966	113	22	0.341353	0.223966	0.117387	119.702
NC_010447.5	68627172	68627231	60	20	0.158118	0.21312	-0.055002	-91.6306
NC_010447.5	68627512	68627566	55	20	0.290476	0.478935	-0.188459	-124.216
NC_010447.5	68818421	68818495	75	9	0.350849	0.506509	-0.15566	-39.8629
NC_010447.5	69437041	69437108	68	8	0.364362	0.215537	0.148825	37.3001
NC_010447.5	77077245	77077511	267	60	0.425057	0.334144	0.0909127	320.112
NC_010447.5	78362898	78362961	64	5	0.361471	0.17489	0.186581	21.5748
NC_010447.5	79594247	79594319	73	19	0.067597	0.101246	-0.0336491	-116.927
NC_010447.5	81111864	81111938	75	4	0.0738703	0.240373	-0.166503	-18.452
NC_010447.5	82643287	82643362	76	8	0.150485	0.318026	-0.167541	-42.6762
NC_010447.5	84080126	84080232	107	22	0.368501	0.49007	-0.121569	-119.155
NC_010447.5	85103269	85103387	119	14	0.25867	0.149627	0.109043	63.0786
NC_010447.5	85279199	85279249	51	9	0.444383	0.63238	-0.187997	-44.3468
NC_010447.5	87569779	87569910	132	30	0.0884827	0.0563616	0.0321211	137.777
NC_010447.5	87864785	87864847	63	12	0.229581	0.29277	-0.0631891	-78.0859
NC_010447.5	88409394	88409448	55	27	0.585697	0.476166	0.109531	109.947
NC_010447.5	88571133	88571213	81	4	0.403212	0.683604	-0.280392	-19.7985
NC_010447.5	88607315	88607467	153	42	0.308667	0.408533	-0.0998664	-270.325
NC_010447.5	89686107	89686181	75	9	0.130439	0.255301	-0.124862	-42.4916
NC_010447.5	92451356	92451415	60	5	0.202458	0.0372089	0.165249	22.0718
NC_010447.5	101820414	101820499	86	10	0.487759	0.367885	0.119874	47.2275
NC_010448.4	636750	636884	135	17	0.506954	0.632805	-0.125851	-118.735
NC_010448.4	805204	805276	73	7	0.251793	0.187254	0.0645382	42.7815
NC_010448.4	909432	909619	188	21	0.481947	0.390398	0.0915489	112.666
NC_010448.4	1144882	1144935	54	5	0.889859	0.829284	0.0605758	29.3314
NC_010448.4	1380070	1380127	58	8	0.394736	0.281595	0.113141	40.5581
NC_010448.4	1670328	1670469	142	27	0.948884	0.89911	0.0497736	116.024
NC_010448.4	1769031	1769102	72	11	0.223394	0.388404	-0.16501	-49.7955
NC_010448.4	1850575	1850630	56	10	0.628627	0.575148	0.0534791	64.7857
NC_010448.4	2590684	2590859	176	30	0.449401	0.353989	0.0954121	163.566
NC_010448.4	2618415	2618470	56	9	0.682169	0.54539	0.136779	45.184
NC_010448.4	3017829	3017967	139	22	0.259159	0.169036	0.090123	124.907
NC_010448.4	3152369	3152462	94	21	0.835719	0.939928	-0.104209	-115.145
NC_010448.4	3181258	3181443	186	39	0.0488402	0.106538	-0.057698	-212.674
NC_010448.4	3181914	3182044	131	13	0.407836	0.499701	-0.0918652	-76.163
NC_010448.4	3296651	3296747	97	30	0.160754	0.0947418	0.0660122	161.077
NC_010448.4	3308282	3308404	123	9	0.137855	0.257387	-0.119532	-45.8907
NC_010448.4	3481449	3481687	239	11	0.390171	0.677923	-0.287751	-54.2758
NC_010448.4	3548551	3548621	71	11	0.768561	0.925339	-0.156777	-55.7366
NC_010448.4	3562054	3562130	77	18	0.648371	0.528348	0.120024	83.6091
NC_010448.4	3657750	3657803	54	16	0.11937	0.160386	-0.041016	-113.341
NC_010448.4	4452047	4452175	129	13	0.922367	0.776612	0.145755	70.2019
NC_010448.4	6888487	6888706	220	26	0.0790674	0.188682	-0.109614	-164.189
NC_010448.4	9472638	9472780	143	13	0.250169	0.118883	0.131286	71.5116
NC_010448.4	9909222	9909302	81	9	0.537199	0.679597	-0.142398	-55.3864
NC_010448.4	11422778	11422831	54	7	0.413656	0.238472	0.175185	31.6413
NC_010448.4	11437889	11437944	56	5	0.400657	0.215539	0.185118	26.2965
NC_010448.4	12709161	12709228	68	9	0.650648	0.713335	-0.0626873	-28.7787
NC_010448.4	13951645	13951731	87	10	0.476906	0.718374	-0.241468	-62.596
NC_010448.4	13956907	13957009	103	12	0.552486	0.753991	-0.201505	-61.5508
NC_010448.4	14389180	14389235	56	5	0.0221162	0.241014	-0.218897	-22.7745
NC_010448.4	14569576	14569740	165	35	0.574161	0.463719	0.110442	201.28
NC_010448.4	15818518	15818590	73	6	0.639416	0.530887	0.108529	32.2841
NC_010448.4	17652823	17653101	279	70	0.812513	0.879421	-0.0669077	-437.906
NC_010448.4	19013060	19013134	75	7	0.11254	0.282095	-0.169555	-39.9357
NC_010448.4	25788956	25789029	74	6	0.30201	0.0996532	0.202357	29.2538
NC_010448.4	25934366	25934596	231	36	0.624401	0.500113	0.124288	220.593
NC_010448.4	28587473	28587619	147	36	0.246149	0.165303	0.0808461	177.071
NC_010448.4	28835922	28836138	217	40	0.458695	0.601411	-0.142716	-269.943
NC_010448.4	30508189	30508366	178	21	0.132445	0.0806846	0.0517604	99.69
NC_010448.4	33730475	33730626	152	22	0.812309	0.904092	-0.0917832	-149.685
NC_010448.4	35213070	35213160	91	4	0.579405	0.198552	0.380853	27.3103
NC_010448.4	35283305	35283422	118	19	0.232009	0.124155	0.107853	83.9837
NC_010448.4	35419474	35419552	79	7	0.223595	0.0972877	0.126308	34.6538
NC_010448.4	35734851	35734925	75	5	0.311299	0.531022	-0.219723	-28.3053
NC_010448.4	36179960	36180113	154	14	0.335344	0.19321	0.142133	92.4775
NC_010448.4	37443471	37443643	173	44	0.116469	0.0863098	0.0301595	207.187
NC_010448.4	39853820	39853882	63	5	0.149178	0.0622848	0.0868932	21.7377
NC_010448.4	40220685	40220761	77	9	0.247383	0.157071	0.090312	39.429
NC_010448.4	42274329	42274453	125	27	0.166917	0.0695585	0.097358	182.84
NC_010448.4	42815919	42816011	93	13	0.194345	0.314544	-0.120199	-59.2259
NC_010448.4	42988013	42988233	221	70	0.570224	0.43768	0.132545	604.457
NC_010448.4	43529802	43529873	72	22	0.546669	0.495162	0.0515065	120.641
NC_010448.4	44438907	44439048	142	15	0.253235	0.138813	0.114422	78.0311
NC_010448.4	45988125	45988214	90	5	0.0951737	0.0269908	0.068183	20.0993
NC_010448.4	47224663	47224713	51	16	0.796413	0.835498	-0.0390851	-90.7087
NC_010448.4	47422333	47422417	85	7	0.181057	0.321657	-0.1406	-28.0495
NC_010448.4	47442712	47442778	67	7	0.53052	0.72057	-0.19005	-37.6768
NC_010448.4	47731160	47731289	130	20	0.961723	0.886962	0.0747614	88.8368
NC_010448.4	47901620	47901711	92	9	0.88925	0.803833	0.0854171	34.6544
NC_010448.4	49346536	49346697	162	33	0.814593	0.874131	-0.0595386	-155.817
NC_010448.4	49619832	49619990	159	25	0.460513	0.356128	0.104384	147.08
NC_010448.4	49620091	49620151	61	7	0.357667	0.498948	-0.141281	-36.4875
NC_010448.4	50549178	50549275	98	14	0.926216	0.824133	0.102083	75.177
NC_010448.4	51253756	51253821	66	11	0.508681	0.426255	0.0824264	41.4222
NC_010448.4	51613296	51613370	75	11	0.497969	0.393583	0.104385	52.9474
NC_010448.4	51641931	51642006	76	13	0.614089	0.501526	0.112564	56.6571
NC_010448.4	51816840	51816923	84	4	0.236095	0.533743	-0.297648	-20.4714
NC_010448.4	52128162	52128315	154	34	0.300167	0.391528	-0.0913616	-178.339
NC_010448.4	52418825	52418882	58	9	0.157707	0.0784316	0.0792753	43.0506
NC_010448.4	52475438	52475504	67	14	0.0937162	0.0501203	0.0435959	97.0077
NC_010448.4	52870873	52871010	138	32	0.6088	0.510706	0.098094	183.262
NC_010448.4	52892807	52892881	75	13	0.944364	0.842978	0.101387	55.5602
NC_010448.4	53225443	53225494	52	15	0.342738	0.267657	0.0750813	70.9291
NC_010448.4	53427088	53427312	225	36	0.239323	0.347343	-0.10802	-238.719
NC_010448.4	53763789	53763899	111	15	0.125962	0.0603339	0.0656282	80.4552
NC_010448.4	53981248	53981351	104	11	0.788906	0.693326	0.0955804	54.0688
NC_010448.4	53991045	53991095	51	12	0.560898	0.513911	0.0469875	74.1119
NC_010448.4	53991209	53991281	73	19	0.577577	0.516979	0.0605975	132.712
NC_010448.4	53998098	53998227	130	8	0.0987001	0.165539	-0.066839	-33.5635
NC_010448.4	54022077	54022164	88	11	0.800921	0.663277	0.137645	55.6961
NC_010448.4	54071017	54071103	87	26	0.274388	0.346234	-0.0718463	-193.354
NC_010448.4	54081463	54081726	264	46	0.310499	0.215078	0.0954218	339.933
NC_010448.4	54335737	54335899	163	27	0.546919	0.676407	-0.129487	-144.575
NC_010448.4	54601847	54601938	92	12	0.39058	0.533517	-0.142937	-56.6444
NC_010448.4	54602314	54602397	84	17	0.39409	0.456683	-0.0625926	-73.3435
NC_010448.4	54693499	54693680	182	31	0.949249	0.871323	0.0779259	168.602
NC_010448.4	55010513	55010614	102	19	0.330179	0.420145	-0.0899658	-92.6142
NC_010448.4	55387537	55387652	116	7	0.319992	0.128613	0.191379	43.1376
NC_010448.4	55484943	55485080	138	6	0.894647	0.711179	0.183468	29.7576
NC_010448.4	55665643	55665756	114	6	0.259414	0.55155	-0.292136	-35.0064
NC_010448.4	55910760	55910867	108	15	0.565065	0.469551	0.0955133	64.0206
NC_010448.4	56150640	56150838	199	46	0.222095	0.323617	-0.101522	-280.279
NC_010448.4	57106854	57106933	80	26	0.586554	0.657087	-0.0705328	-115.272
NC_010448.4	57668149	57670012	1864	14	0.425273	0.254736	0.170537	66.9022
NC_010448.4	58876293	58876359	67	7	0.305054	0.163359	0.141695	32.652
NC_010448.4	59316522	59316580	59	7	0.144348	0.175668	-0.0313199	-30.8057
NC_010448.4	60759454	60759591	138	20	0.339284	0.196256	0.143028	120.939
NC_010448.4	62432885	62432963	79	7	0.451593	0.316331	0.135262	25.8238
NC_010448.4	62719305	62719357	53	16	0.237216	0.288447	-0.0512305	-91.2264
NC_010448.4	63104644	63104742	99	23	0.0978286	0.156799	-0.0589706	-138.489
NC_010448.4	63288990	63289097	108	33	0.342812	0.268898	0.0739145	186.103
NC_010448.4	63305480	63305553	74	24	0.499197	0.240826	0.258371	212.946
NC_010448.4	63485488	63485679	192	20	0.658545	0.437374	0.221171	149.818
NC_010448.4	63765502	63765768	267	82	0.273696	0.206391	0.0673051	422.74
NC_010448.4	64172786	64172953	168	52	0.410673	0.335516	0.0751564	251.915
NC_010448.4	64189305	64189394	90	11	0.0687244	0.0358122	0.0329122	54.1325
NC_010448.4	64342509	64342617	109	11	0.547741	0.687615	-0.139873	-46.6066
NC_010448.4	64416019	64416076	58	4	0.319862	0.0790503	0.240812	19.2728
NC_010448.4	65092691	65092789	99	9	0.481779	0.724919	-0.24314	-53.1042
NC_010448.4	65096589	65096671	83	13	0.0713384	0.168759	-0.0974207	-60.5639
NC_010448.4	65212270	65212402	133	27	0.960202	0.913397	0.0468055	138.157
NC_010448.4	65289401	65289493	93	13	0.918005	0.80907	0.108935	55.7292
NC_010448.4	66834413	66834547	135	30	0.936254	0.807077	0.129178	178.708
NC_010448.4	66953747	66953888	142	24	0.116446	0.184686	-0.0682399	-116.717
NC_010448.4	66963944	66964053	110	11	0.285594	0.188652	0.0969423	49.8171
NC_010448.4	67342708	67342822	115	20	0.119523	0.209683	-0.0901606	-102.585
NC_010448.4	67433396	67433526	131	34	0.102029	0.0566579	0.0453712	167.862
NC_010448.4	67720898	67720951	54	5	0.157615	0.257759	-0.100144	-20.7098
NC_010448.4	67759463	67759554	92	9	0.279366	0.468947	-0.189581	-47.5906
NC_010448.4	67859272	67859383	112	12	0.197043	0.120751	0.0762923	55.1264
NC_010448.4	67942044	67942118	75	9	0.32303	0.187026	0.136004	38.3396
NC_010448.4	67963432	67963492	61	11	0.32201	0.237481	0.0845291	49.9003
NC_010448.4	68116475	68116606	132	12	0.0981374	0.179721	-0.0815833	-55.8302
NC_010448.4	68168581	68168654	74	16	0.379708	0.209503	0.170204	92.6055
NC_010448.4	68216154	68216273	120	12	0.222605	0.10417	0.118435	65.4938
NC_010448.4	68267652	68267799	148	17	0.196877	0.107532	0.0893458	79.6197
NC_010448.4	68883598	68883711	114	17	0.257555	0.179146	0.0784095	72.413
NC_010448.4	69135914	69136043	130	16	0.0865408	0.239165	-0.152624	-97.9688
NC_010448.4	69983448	69983510	63	9	0.950621	0.873834	0.0767877	45.5653
NC_010448.4	70883088	70883163	76	13	0.220454	0.179533	0.0409205	44.2723
NC_010448.4	70911664	70911728	65	17	0.601023	0.482747	0.118276	74.492
NC_010448.4	71434460	71434552	93	7	0.459997	0.724943	-0.264946	-42.8899
NC_010448.4	72086872	72086970	99	9	0.547313	0.701949	-0.154636	-43.778
NC_010448.4	72480224	72480288	65	10	0.221626	0.154611	0.0670155	57.7096
NC_010448.4	74236667	74236717	51	17	0.243245	0.173798	0.0694462	80.4154
NC_010448.4	74320067	74320168	102	6	0.728591	0.563891	0.1647	29.0615
NC_010448.4	74336389	74336458	70	5	0.959971	0.790616	0.169355	22.9313
NC_010448.4	75457272	75457336	65	7	0.247937	0.119555	0.128382	35.2263
NC_010448.4	76943556	76943645	90	9	0.33271	0.497541	-0.164831	-41.8426
NC_010448.4	77608323	77608471	149	18	0.952205	0.82855	0.123654	97.2209
NC_010448.4	78060489	78060545	57	8	0.139599	0.0638593	0.0757397	59.345
NC_010448.4	78731916	78731980	65	9	0.0669483	0.18843	-0.121482	-47.2046
NC_010448.4	78732089	78732145	57	17	0.155719	0.111353	0.0443666	85.8902
NC_010448.4	79502278	79502405	128	9	0.160014	0.266362	-0.106347	-49.6743
NC_010448.4	80490223	80490313	91	11	0.220436	0.344467	-0.124031	-49.6178
NC_010448.4	83382083	83382139	57	10	0.139681	0.0821805	0.0575008	84.7932
NC_010448.4	85865172	85865252	81	17	0.278847	0.224251	0.054596	58.637
NC_010448.4	86034044	86034288	245	33	0.620902	0.448578	0.172324	240.067
NC_010448.4	87527084	87527179	96	11	0.546383	0.422113	0.12427	47.6704
NC_010448.4	87825249	87825516	268	60	0.355697	0.434725	-0.0790279	-358.718
NC_010448.4	89069071	89069300	230	25	0.109368	0.069958	0.0394098	115.69
NC_010448.4	90099214	90099304	91	4	0.181516	0.0188922	0.162624	19.0346
NC_010448.4	92443431	92443528	98	8	0.93754	0.806788	0.130753	40.5613
NC_010448.4	93803766	93803830	65	9	0.468408	0.404872	0.0635358	47.1594
NC_010448.4	93803913	93803963	51	9	0.456968	0.381003	0.0759649	58.9178
NC_010448.4	95321448	95321601	154	38	0.418339	0.324363	0.093976	263.428
NC_010448.4	95580715	95580895	181	52	0.194896	0.103815	0.0910809	513.812
NC_010448.4	99430725	99430797	73	5	0.268372	0.432106	-0.163734	-19.9776
NC_010448.4	100854636	100854719	84	8	0.334782	0.273718	0.0610634	46.3201
NC_010448.4	103735169	103735512	344	45	0.697538	0.731828	-0.0342904	-79.9529
NC_010448.4	103786625	103786825	201	53	0.169912	0.129699	0.0402135	272.477
NC_010448.4	103787130	103787231	102	25	0.102031	0.167907	-0.0658764	-106.877
NC_010448.4	107366140	107366219	80	11	0.129689	0.21466	-0.0849711	-47.7929
NC_010448.4	109235660	109235728	69	5	0.081272	0.127196	-0.0459238	-30.2986
NC_010448.4	110122240	110122434	195	40	0.556609	0.658991	-0.102382	-245.487
NC_010448.4	110122956	110123028	73	23	0.763665	0.613889	0.149776	170.025
NC_010448.4	111149454	111149671	218	24	0.673487	0.561226	0.11226	122.837
NC_010448.4	111272840	111272971	132	5	0.079875	0.427552	-0.347677	-26.2787
NC_010448.4	112628841	112628992	152	64	0.733142	0.788172	-0.0550301	-305.487
NC_010448.4	115412349	115412423	75	11	0.425546	0.292309	0.133238	49.2516
NC_010448.4	116609775	116609947	173	32	0.23221	0.14801	0.0841997	243.626
NC_010448.4	119734983	119735144	162	25	0.308205	0.427127	-0.118922	-117.165
NC_010448.4	121077154	121077274	121	29	0.128616	0.0964768	0.0321397	135.075
NC_010448.4	133198089	133198157	69	4	0.243362	0.606055	-0.362694	-20.9061
NC_010448.4	137464429	137464503	75	7	0.522912	0.704468	-0.181556	-34.2513
NC_010448.4	139021161	139021222	62	4	0.10357	0.315036	-0.211467	-20.6496
NC_010448.4	145674186	145674273	88	8	0.436098	0.598147	-0.162049	-44.9631
NC_010448.4	145674525	145674718	194	67	0.441067	0.37493	0.0661362	332.742
NC_010448.4	151094104	151094183	80	6	0.34745	0.619844	-0.272394	-29.4798
NC_010448.4	152321614	152321840	227	33	0.301328	0.428424	-0.127095	-171.303
NC_010448.4	153860004	153860074	71	23	0.532183	0.480162	0.0520214	103.186
NC_010448.4	153860437	153860496	60	17	0.579981	0.531758	0.0482229	84.8796
NC_010448.4	157813003	157813068	66	9	0.105123	0.0253362	0.0797869	38.6738
NC_010448.4	161616835	161617031	197	33	0.524366	0.431621	0.0927452	187.238
NC_010448.4	163444937	163445049	113	12	0.42261	0.256282	0.166329	68.0233
NC_010448.4	163545039	163545158	120	14	0.201956	0.0724363	0.129519	80.7703
NC_010448.4	163623247	163623366	120	20	0.362624	0.193168	0.169455	112.687
NC_010448.4	163779806	163779889	84	6	0.215897	0.030967	0.18493	32.9921
NC_010448.4	163830508	163830716	209	31	0.230279	0.124957	0.105322	189.108
NC_010448.4	166334282	166334388	107	15	0.114088	0.0369132	0.0771752	63.8207
NC_010448.4	167238005	167238108	104	11	0.648037	0.467403	0.180634	57.5934
NC_010448.4	167315953	167316208	256	64	0.814275	0.921941	-0.107666	-702.647
NC_010448.4	169384849	169384922	74	16	0.131444	0.0448723	0.086572	93.9584
NC_010448.4	169578756	169578819	64	8	0.333568	0.18014	0.153429	36.0583
NC_010448.4	169582168	169582273	106	11	0.284968	0.374973	-0.0900046	-45.6818
NC_010448.4	169981162	169981298	137	13	0.245548	0.115423	0.130126	71.7859
NC_010448.4	170000027	170000083	57	12	0.874646	0.500196	0.37445	103.684
NC_010448.4	170367839	170368065	227	57	0.416099	0.285459	0.13064	391.355
NC_010448.4	170382111	170382236	126	12	0.286876	0.0943052	0.19257	98.5973
NC_010448.4	170604408	170604460	53	15	0.246573	0.13035	0.116223	66.8816
NC_010449.5	611767	611838	72	10	0.815222	0.570602	0.24462	49.4948
NC_010449.5	628710	628944	235	30	0.604524	0.716373	-0.111849	-137.343
NC_010449.5	725811	725928	118	23	0.464594	0.585686	-0.121091	-126.563
NC_010449.5	810973	811101	129	29	0.457365	0.593557	-0.136192	-149.867
NC_010449.5	868882	868932	51	5	0.596924	0.469706	0.127217	20.5389
NC_010449.5	902183	902334	152	20	0.601249	0.503998	0.0972512	100.974
NC_010449.5	933169	933244	76	20	0.721265	0.59637	0.124895	118.977
NC_010449.5	992906	993003	98	15	0.414607	0.316896	0.0977112	73.6888
NC_010449.5	1702961	1703070	110	10	0.45125	0.601398	-0.150148	-54.3671
NC_010449.5	2493984	2494044	61	9	0.652484	0.53196	0.120525	42.1133
NC_010449.5	2712739	2712794	56	4	0.821898	0.880436	-0.0585375	-22.2494
NC_010449.5	2846584	2846636	53	11	0.0632625	0.10732	-0.0440576	-53.9676
NC_010449.5	3422129	3422214	86	9	0.842306	0.736892	0.105414	36.0832
NC_010449.5	4325221	4325344	124	19	0.360913	0.491597	-0.130684	-100.437
NC_010449.5	4367488	4367577	90	17	0.251735	0.150867	0.100868	85.8931
NC_010449.5	4994863	4994961	99	11	0.555803	0.353486	0.202317	48.5493
NC_010449.5	5203427	5203483	57	5	0.44167	0.328354	0.113316	25.6499
NC_010449.5	7229094	7229232	139	41	0.744342	0.654173	0.0901692	222.595
NC_010449.5	7229355	7229415	61	13	0.493951	0.428789	0.0651616	50.1051
NC_010449.5	8567656	8567768	113	23	0.418322	0.304835	0.113487	104.803
NC_010449.5	9663240	9663297	58	5	0.279485	0.094561	0.184924	22.5042
NC_010449.5	10706581	10706698	118	14	0.373888	0.234537	0.139351	62.9874
NC_010449.5	11414094	11414224	131	6	0.0690275	0.312595	-0.243567	-34.6538
NC_010449.5	13137333	13137508	176	50	0.394147	0.298405	0.0957423	297.18
NC_010449.5	13817429	13817573	145	29	0.653634	0.567079	0.0865548	155.498
NC_010449.5	21972370	21972488	119	16	0.498109	0.809144	-0.311036	-150.488
NC_010449.5	23173368	23173502	135	36	0.541806	0.776726	-0.23492	-512.099
NC_010449.5	23218797	23218974	178	28	0.512716	0.424714	0.0880015	140.589
NC_010449.5	23779911	23780085	175	30	0.665174	0.583187	0.0819878	143.752
NC_010449.5	23927325	23927454	130	30	0.404613	0.246552	0.158062	356.883
NC_010449.5	24124454	24124689	236	28	0.590954	0.793867	-0.202913	-211.795
NC_010449.5	29877947	29878084	138	11	0.880225	0.709524	0.1707	55.9853
NC_010449.5	30321535	30321685	151	20	0.405902	0.310934	0.0949679	117.368
NC_010449.5	31211830	31211898	69	6	0.597498	0.28711	0.310388	30.1112
NC_010449.5	31350973	31351154	182	37	0.742246	0.609056	0.13319	253.064
NC_010449.5	32411222	32411390	169	46	0.370422	0.449326	-0.0789038	-264.923
NC_010449.5	33143641	33143823	183	23	0.413588	0.54148	-0.127892	-141.872
NC_010449.5	33317753	33320628	2876	7	0.428019	0.203635	0.224384	34.2156
NC_010449.5	34616330	34616418	89	9	0.257911	0.177868	0.0800429	37.187
NC_010449.5	35764742	35764815	74	9	0.564626	0.392744	0.171882	36.741
NC_010449.5	36359528	36359611	84	12	0.403823	0.286618	0.117205	53.2337
NC_010449.5	36935634	36935864	231	11	0.421289	0.73465	-0.31336	-71.776
NC_010449.5	38996436	38996549	114	9	0.316367	0.557188	-0.240821	-46.326
NC_010449.5	38999784	38999880	97	12	0.815582	0.899048	-0.0834656	-64.83
NC_010449.5	39353096	39353172	77	22	0.110711	0.193546	-0.0828354	-118.675
NC_010449.5	49150028	49150125	98	38	0.129077	0.0858942	0.0431826	205.619
NC_010449.5	55343308	55343606	299	88	0.518485	0.389502	0.128983	959.22
NC_010449.5	58650358	58650480	123	28	0.578445	0.732135	-0.15369	-137.251
NC_010449.5	58784448	58784571	124	11	0.300176	0.177954	0.122222	54.846
NC_010449.5	61771053	61771122	70	10	0.209959	0.417035	-0.207076	-52.0044
NC_010449.5	65805446	65805645	200	36	0.601202	0.461503	0.139699	260.63
NC_010449.5	65806031	65806097	67	21	0.459669	0.531957	-0.0722874	-98.8907
NC_010449.5	68181080	68181153	74	9	0.64573	0.370702	0.275028	45.4925
NC_010449.5	72804681	72804894	214	26	0.429423	0.275165	0.154257	145.966
NC_010449.5	75030089	75030250	162	16	0.434503	0.337473	0.0970295	82.5973
NC_010449.5	75777538	75777653	116	19	0.496748	0.389461	0.107287	117.178
NC_010449.5	75777779	75778007	229	76	0.44941	0.534935	-0.0855246	-551.015
NC_010449.5	87977966	87978033	68	7	0.280087	0.473831	-0.193743	-38.5702
NC_010449.5	88410841	88410903	63	12	0.643016	0.429353	0.213663	64.999
NC_010449.5	88818802	88818929	128	7	0.856274	0.597284	0.25899	34.3183
NC_010449.5	93480092	93480152	61	21	0.603881	0.739908	-0.136027	-103.354
NC_010449.5	97533407	97533545	139	21	0.395536	0.520136	-0.1246	-105.653
NC_010449.5	99952063	99952113	51	5	0.756965	0.570813	0.186152	20.0297
NC_010449.5	107887404	107887551	148	13	0.902759	0.721624	0.181135	79.1372
NC_010449.5	110267505	110267729	225	58	0.519927	0.434369	0.0855583	331.226
NC_010449.5	115051090	115051230	141	16	0.266894	0.478478	-0.211584	-106.019
NC_010449.5	117450549	117450641	93	9	0.453829	0.297877	0.155951	37.9084
NC_010449.5	120992409	120992481	73	8	0.433843	0.611713	-0.17787	-35.5069
NC_010449.5	121191556	121191680	125	21	0.391493	0.502267	-0.110774	-106.988
NC_010449.5	121391051	121391170	120	50	0.833509	0.733281	0.100228	281.176
NC_010450.4	446866	447139	274	44	0.743655	0.879936	-0.136281	-295.909
NC_010450.4	488989	489099	111	17	0.944187	0.876469	0.067718	74.1582
NC_010450.4	710705	710840	136	28	0.408253	0.286782	0.121472	144.034
NC_010450.4	742998	743058	61	10	0.141756	0.0616675	0.0800889	48.087
NC_010450.4	769406	769521	116	7	0.37357	0.214824	0.158747	35.7053
NC_010450.4	868202	868307	106	21	0.5422	0.45463	0.0875703	81.1823
NC_010450.4	881202	881373	172	38	0.107168	0.0553839	0.0517841	215.828
NC_010450.4	1065821	1065994	174	30	0.181512	0.104536	0.0769766	164.2
NC_010450.4	1071824	1071899	76	11	0.318752	0.229583	0.0891687	46.851
NC_010450.4	2188864	2188921	58	16	0.583022	0.730727	-0.147705	-92.8924
NC_010450.4	2418098	2418153	56	13	0.199988	0.119221	0.0807666	61.3127
NC_010450.4	2882205	2882261	57	7	0.154892	0.262137	-0.107244	-30.0893
NC_010450.4	2898745	2898831	87	11	0.228888	0.136406	0.0924819	49.678
NC_010450.4	3256327	3256414	88	13	0.171574	0.0988427	0.0727312	54.8067
NC_010450.4	3296092	3296153	62	5	0.139106	0.0849845	0.054121	30.0278
NC_010450.4	4571773	4571842	70	7	0.546894	0.664395	-0.117501	-35.5636
NC_010450.4	5092817	5092868	52	7	0.179978	0.0642522	0.115726	40.2861
NC_010450.4	9185552	9185624	73	15	0.773408	0.623557	0.149851	65.2702
NC_010450.4	11084377	11084485	109	23	0.204378	0.108429	0.0959492	126.783
NC_010450.4	23458738	23458791	54	9	0.527647	0.421702	0.105945	59.4553
NC_010450.4	42012078	42012140	63	11	0.574646	0.402634	0.172012	49.9655
NC_010450.4	56363632	56363763	132	11	0.293083	0.141588	0.151495	50.8364
NC_010450.4	59987674	59987891	218	55	0.453635	0.558019	-0.104385	-374.777
NC_010450.4	82367132	82367200	69	12	0.546131	0.466196	0.0799348	62.8928
NC_010450.4	111718670	111718872	203	36	0.147536	0.0759521	0.0715841	227.448
NC_010450.4	111719331	111719558	228	30	0.186133	0.053589	0.132544	230.66
NC_010450.4	111728460	111728708	249	50	0.150537	0.0728855	0.0776515	380.81
NC_010450.4	120372131	120372225	95	6	0.301158	0.467413	-0.166255	-37.5543
NC_010450.4	121524804	121524870	67	10	0.381799	0.598019	-0.21622	-51.7345
NC_010450.4	121859928	121860022	95	10	0.487492	0.755587	-0.268096	-60.7478
NC_010450.4	130444501	130444606	106	12	0.708468	0.869347	-0.160879	-57.9252
NC_010450.4	137980401	137980504	104	18	0.5467	0.714131	-0.167431	-92.3539
NC_010451.4	20982	21138	157	25	0.0818014	0.0400033	0.041798	107.287
NC_010451.4	1134739	1134906	168	69	0.27143	0.339272	-0.0678422	-402.67
NC_010451.4	1192127	1192241	115	15	0.174359	0.123468	0.050891	91.1149
NC_010451.4	3229030	3229167	138	20	0.868951	0.713421	0.15553	132.25
NC_010451.4	3865720	3865807	88	13	0.182217	0.335275	-0.153058	-64.3058
NC_010451.4	6226094	6226180	87	16	0.131694	0.224799	-0.0931045	-90.4782
NC_010451.4	6814343	6814485	143	22	0.178756	0.118787	0.0599692	151.014
NC_010451.4	7797685	7797855	171	26	0.802263	0.877491	-0.075228	-140.391
NC_010451.4	7799886	7799954	69	13	0.844806	0.89148	-0.0466744	-65.5741
NC_010451.4	8365254	8365363	110	29	0.326192	0.197876	0.128315	176.753
NC_010451.4	9827891	9827945	55	22	0.779286	0.835537	-0.0562511	-108.825
NC_010451.4	10819000	10819072	73	14	0.286815	0.155919	0.130896	69.9589
NC_010451.4	10833246	10833495	250	23	0.864336	0.683411	0.180925	137.94
NC_010451.4	10854965	10855035	71	5	0.437048	0.66802	-0.230972	-25.2392
NC_010451.4	11209960	11210144	185	8	0.513062	0.864543	-0.351481	-57.9539
NC_010451.4	11317009	11317089	81	11	0.632521	0.499507	0.133014	49.3547
NC_010451.4	13237067	13237121	55	7	0.183693	0.28002	-0.0963267	-32.2613
NC_010451.4	13689951	13690027	77	7	0.196386	0.132665	0.063721	25.4894
NC_010451.4	20613936	20614043	108	39	0.111514	0.0736434	0.0378707	187.862
NC_010451.4	26464694	26464874	181	16	0.243603	0.408884	-0.165281	-115.117
NC_010451.4	26680227	26680277	51	16	0.811088	0.840489	-0.0294011	-89.2107
NC_010451.4	26708020	26708094	75	5	0.380225	0.119224	0.261	37.2556
NC_010451.4	27117134	27117217	84	13	0.339474	0.237805	0.10167	65.546
NC_010451.4	31347230	31347298	69	11	0.346078	0.193457	0.15262	52.0973
NC_010451.4	36061839	36061922	84	11	0.447633	0.502482	-0.0548487	-38.8548
NC_010451.4	40006487	40006545	59	9	0.0675913	0.0346041	0.0329872	63.6941
NC_010451.4	40915090	40915225	136	27	0.279151	0.391771	-0.11262	-115.4
NC_010451.4	41334779	41334842	64	7	0.280772	0.481035	-0.200263	-31.5756
NC_010451.4	41734963	41735044	82	4	0.309174	0.0478293	0.261345	24.6042
NC_010451.4	41835465	41835632	168	22	0.350964	0.215991	0.134973	121.095
NC_010451.4	42643299	42643373	75	7	0.362214	0.202541	0.159674	33.9009
NC_010451.4	43961467	43961523	57	6	0.353314	0.150241	0.203074	32.839
NC_010451.4	45405664	45405746	83	8	0.326524	0.221188	0.105336	44.1342
NC_010451.4	45903587	45903699	113	15	0.844782	0.778998	0.0657843	74.8944
NC_010451.4	47689123	47689244	122	22	0.786622	0.548322	0.2383	175.578
NC_010451.4	52350458	52350511	54	26	0.292261	0.250732	0.0415285	168.662
NC_010451.4	57127398	57127558	161	25	0.465654	0.537113	-0.0714583	-124.433
NC_010451.4	63339009	63339093	85	9	0.240959	0.447818	-0.20686	-42.7878
NC_010451.4	70284433	70284645	213	38	0.116855	0.0381078	0.0787476	341.998
NC_010451.4	70335609	70335905	297	57	0.172823	0.0868125	0.0860108	546.289
NC_010451.4	74474020	74474222	203	37	0.357989	0.426931	-0.0689419	-229.139
NC_010451.4	76625491	76625811	321	72	0.705695	0.593292	0.112403	523.458
NC_010451.4	77475259	77475333	75	12	0.611195	0.440148	0.171048	66.4254
NC_010451.4	78653738	78653799	62	12	0.188319	0.357057	-0.168737	-56.7086
NC_010451.4	84811568	84811642	75	19	0.652169	0.509531	0.142637	82.8604
NC_010451.4	89778016	89778240	225	60	0.535102	0.475179	0.0599227	291.964
NC_010451.4	89778456	89778514	59	15	0.282115	0.416413	-0.134298	-92.8194
NC_010451.4	89949101	89949176	76	14	0.515967	0.360271	0.155696	85.0842
NC_010451.4	92681976	92682115	140	49	0.0445013	0.0751644	-0.0306631	-233.842
NC_010451.4	93110491	93110571	81	4	0.460524	0.133762	0.326761	21.9013
NC_010451.4	95281473	95281678	206	13	0.624147	0.43414	0.190007	76.911
NC_010451.4	100271826	100271899	74	23	0.124547	0.0877024	0.0368449	110.458
NC_010451.4	100272214	100272402	189	74	0.119194	0.186355	-0.0671615	-584.37
NC_010451.4	104890986	104891220	235	26	0.263431	0.354422	-0.0909903	-125.666
NC_010451.4	105645449	105645524	76	5	0.353397	0.235422	0.117976	27.5193
NC_010451.4	106544756	106544926	171	32	0.330955	0.202822	0.128133	189.073
NC_010451.4	107978044	107978213	170	14	0.686202	0.47757	0.208632	78.9755
NC_010451.4	117795436	117795522	87	6	0.350914	0.0855057	0.265409	38.0593
NC_010451.4	121850670	121850754	85	24	0.239549	0.341038	-0.101489	-123.835
NC_010451.4	128150235	128150309	75	7	0.505467	0.353286	0.152181	38.1446
NC_010451.4	130502632	130502741	110	6	0.300695	0.15338	0.147316	27.9369
NC_010451.4	132529638	132529756	119	13	0.297169	0.171554	0.125615	96.5964
NC_010451.4	133311275	133311329	55	8	0.221253	0.143229	0.0780243	45.5428
NC_010451.4	134601810	134601937	128	11	0.714369	0.494452	0.219917	70.6885
NC_010451.4	134640003	134640061	59	4	0.795121	0.544084	0.251037	20.1041
NC_010451.4	134998455	134998521	67	4	0.64442	0.798572	-0.154152	-23.525
NC_010451.4	136829269	136829329	61	10	0.419578	0.486078	-0.0665	-54.7411
NC_010451.4	139466041	139466135	95	10	0.275706	0.164052	0.111653	58.0022
NC_010452.4	905293	905402	110	15	0.170472	0.302178	-0.131706	-71.2078
NC_010452.4	1083524	1083598	75	13	0.372611	0.258875	0.113736	52.3125
NC_010452.4	1302924	1303004	81	11	0.367925	0.25335	0.114575	45.6232
NC_010452.4	9431091	9431155	65	9	0.146871	0.257305	-0.110434	-43.1066
NC_010452.4	9980558	9980625	68	8	0.238117	0.191961	0.046156	51.4162
NC_010452.4	10156775	10156940	166	68	0.1944	0.126917	0.0674828	541.007
NC_010452.4	11343711	11343788	78	9	0.802549	0.661726	0.140823	42.9123
NC_010452.4	14495849	14495922	74	9	0.533321	0.38724	0.146081	40.4461
NC_010452.4	17712206	17712281	76	14	0.244752	0.192095	0.0526567	99.7161
NC_010452.4	17903029	17903102	74	4	0.431519	0.687108	-0.255588	-17.7467
NC_010452.4	18213031	18213146	116	24	0.125621	0.0656342	0.0599873	122.045
NC_010452.4	18352368	18352460	93	10	0.564836	0.375548	0.189289	49.0252
NC_010452.4	19551665	19551872	208	51	0.429715	0.508142	-0.0784271	-315.671
NC_010452.4	19552103	19552414	312	91	0.718466	0.781907	-0.0634409	-550.645
NC_010452.4	19688945	19689029	85	4	0.890309	0.593875	0.296434	19.6707
NC_010452.4	23644309	23644373	65	9	0.240305	0.137874	0.102431	40.6696
NC_010452.4	24275580	24275631	52	4	0.632463	0.298829	0.333634	20.5329
NC_010452.4	25420754	25420828	75	10	0.273325	0.428703	-0.155379	-51.3176
NC_010452.4	27116503	27116614	112	27	0.16835	0.420517	-0.252167	-313.081
NC_010452.4	31929534	31929599	66	17	0.353951	0.449811	-0.09586	-91.9396
NC_010452.4	32134178	32134275	98	5	0.702272	0.444895	0.257378	24.4938
NC_010452.4	39170927	39171076	150	42	0.0715035	0.0441601	0.0273434	195.73
NC_010452.4	40053412	40053543	132	37	0.0834193	0.0473958	0.0360235	204.514
NC_010452.4	48939697	48939760	64	18	0.0461484	0.0244103	0.0217381	104.096
NC_010452.4	52208195	52208246	52	5	0.537312	0.429884	0.107429	33.2594
NC_010452.4	52296929	52296987	59	9	0.154948	0.0819062	0.073042	36.1687
NC_010452.4	52483301	52483351	51	9	0.101747	0.166005	-0.0642584	-46.2443
NC_010452.4	52571543	52571630	88	14	0.517223	0.436926	0.0802978	82.307
NC_010452.4	54676744	54676804	61	16	0.0865868	0.161318	-0.0747314	-89.7369
NC_010452.4	56283825	56283884	60	7	0.198177	0.13745	0.0607269	30.2925
NC_010452.4	56284141	56284308	168	17	0.200687	0.126748	0.0739386	88.0772
NC_010452.4	56727852	56727920	69	9	0.168581	0.0693569	0.0992242	45.408
NC_010452.4	57449051	57449107	57	6	0.59826	0.315187	0.283073	44.7037
NC_010452.4	59501143	59501213	71	16	0.197452	0.0905197	0.106932	89.181
NC_010452.4	60021253	60021336	84	21	0.160656	0.259648	-0.0989916	-93.8876
NC_010452.4	60854772	60854850	79	21	0.730487	0.804449	-0.0739614	-104.033
NC_010452.4	63762316	63762368	53	9	0.125981	0.0487461	0.0772354	39.0093
NC_010452.4	63877528	63877695	168	37	0.362439	0.2811	0.0813384	213.132
NC_010452.4	64838497	64838669	173	17	0.568615	0.41841	0.150204	81.7253
NC_010452.4	64895202	64895255	54	7	0.846095	0.972018	-0.125923	-33.6858
NC_010452.4	65207187	65207288	102	26	0.961711	0.896581	0.0651294	135.988
NC_010452.4	67081473	67081714	242	62	0.445547	0.542378	-0.0968308	-409.293
NC_010452.4	67350905	67351033	129	13	0.095214	0.185593	-0.0903785	-60.376
NC_010452.4	68446288	68446342	55	21	0.921462	0.87357	0.0478923	91.1264
NC_010452.4	68549137	68549202	66	7	0.835808	0.948512	-0.112705	-34.0129
NC_010452.4	69050346	69050396	51	5	0.838434	0.73045	0.107984	22.633
NC_010453.5	925039	925244	206	63	0.797384	0.852439	-0.0550549	-387.565
NC_010453.5	970742	970805	64	10	0.805803	0.713899	0.0919043	46.4446
NC_010453.5	978971	979075	105	4	0.118352	0.574494	-0.456141	-28.5472
NC_010453.5	1006357	1006473	117	15	0.692068	0.592705	0.0993631	79.6893
NC_010453.5	1027360	1027423	64	14	0.56099	0.656264	-0.0952739	-66.8734
NC_010453.5	1057490	1057658	169	19	0.154659	0.0594663	0.0951928	125.904
NC_010453.5	1281605	1281697	93	21	0.0371557	0.076461	-0.0393052	-113.068
NC_010453.5	1678555	1678616	62	9	0.544651	0.626329	-0.0816779	-52.2129
NC_010453.5	2736867	2736989	123	19	0.971218	0.934339	0.0368795	90.5581
NC_010453.5	4237894	4237968	75	9	0.672508	0.52294	0.149567	45.4143
NC_010453.5	5089462	5089544	83	26	0.2703	0.488208	-0.217908	-228.711
NC_010453.5	5454989	5455074	86	12	0.181663	0.0635168	0.118147	66.6649
NC_010453.5	5653844	5653973	130	19	0.542622	0.644026	-0.101403	-87.4179
NC_010453.5	6042148	6042206	59	26	0.399632	0.343781	0.0558511	132.996
NC_010453.5	6390939	6390997	59	4	0.663898	0.390208	0.273689	17.6431
NC_010453.5	11515973	11516074	102	19	0.542986	0.725701	-0.182715	-127.285
NC_010453.5	11587664	11587757	94	12	0.451699	0.271237	0.180463	54.1991
NC_010453.5	12346126	12346320	195	28	0.403207	0.278804	0.124403	205.843
NC_010453.5	12723592	12723747	156	31	0.974584	0.95019	0.0243945	132.056
NC_010453.5	14566267	14566363	97	11	0.11488	0.0781944	0.0366855	41.7186
NC_010453.5	14772052	14772137	86	4	0.247038	0.0493179	0.19772	20.9892
NC_010453.5	17685491	17685577	87	23	0.468159	0.540663	-0.0725033	-101.275
NC_010453.5	17685833	17685931	99	10	0.429114	0.563581	-0.134467	-47.1122
NC_010453.5	19700793	19700863	71	10	0.509583	0.421517	0.0880666	41.8027
NC_010453.5	21206266	21206346	81	5	0.630602	0.921036	-0.290434	-31.7689
NC_010453.5	22866231	22866305	75	8	0.908646	0.744923	0.163723	37.9111
NC_010453.5	26837569	26837650	82	7	0.227593	0.0716706	0.155923	38.1033
NC_010453.5	27830084	27830157	74	9	0.368079	0.610985	-0.242906	-49.9464
NC_010453.5	47485832	47485907	76	10	0.44339	0.634463	-0.191073	-54.8456
NC_010453.5	47528747	47528847	101	15	0.631162	0.516054	0.115108	75.4689
NC_010453.5	50655765	50655851	87	17	0.336282	0.473934	-0.137652	-75.6969
NC_010453.5	50847614	50847692	79	10	0.321801	0.506473	-0.184672	-46.3419
NC_010453.5	52417009	52417081	73	5	0.270924	0.114691	0.156233	20.5739
NC_010453.5	56755516	56755590	75	9	0.739254	0.474165	0.265089	53.4478
NC_010453.5	64102475	64102541	67	6	0.613872	0.807503	-0.193631	-31.4099
NC_010453.5	65121524	65121658	135	48	0.455193	0.37445	0.0807425	305.286
NC_010453.5	68810084	68810168	85	11	0.248076	0.31807	-0.069994	-54.0887
NC_010453.5	68839244	68839299	56	16	0.0938939	0.128614	-0.0347196	-86.317
NC_010453.5	71201560	71201682	123	4	0.107111	0.508581	-0.401471	-24.3694
NC_010453.5	72198608	72198682	75	9	0.256765	0.120245	0.13652	43.4966
NC_010453.5	76653251	76653338	88	12	0.574169	0.621351	-0.0471819	-61.3956
NC_010453.5	76654104	76654158	55	12	0.215442	0.403182	-0.18774	-54.4645
NC_010453.5	76833831	76833885	55	5	0.760647	0.568404	0.192243	24.3082
NC_010453.5	76890827	76890980	154	20	0.518786	0.606361	-0.087575	-98.9028
NC_010453.5	77743260	77743323	64	5	0.13079	0.335144	-0.204354	-24.6561
NC_010453.5	77791434	77791488	55	7	0.213767	0.153033	0.0607342	31.8152
NC_010453.5	77975959	77976020	62	8	0.505588	0.662138	-0.15655	-41.3327
NC_010453.5	78399510	78399627	118	17	0.80559	0.73058	0.0750095	81.0757
NC_010453.5	78400713	78400923	211	25	0.565182	0.430227	0.134955	122.701
NC_010453.5	78413960	78414061	102	7	0.920129	0.74938	0.170749	34.1104
NC_010453.5	78750768	78750842	75	17	0.886154	0.934488	-0.048334	-59.9997
NC_010453.5	78880409	78880555	147	49	0.765302	0.711576	0.0537258	232.036
NC_010454.4	240212	240313	102	23	0.13362	0.0978561	0.0357638	111.936
NC_010454.4	494166	494350	185	47	0.258299	0.194448	0.0638506	220.492
NC_010454.4	494482	494537	56	7	0.489257	0.400199	0.089058	27.3166
NC_010454.4	549354	549434	81	11	0.971244	0.905699	0.0655445	45.4307
NC_010454.4	730612	730692	81	33	0.138202	0.110095	0.0281074	143.314
NC_010454.4	730826	730880	55	17	0.13994	0.180314	-0.0403737	-70.7669
NC_010454.4	746995	747091	97	9	0.218464	0.481902	-0.263438	-47.6221
NC_010454.4	755900	756088	189	35	0.827735	0.895215	-0.0674801	-198.146
NC_010454.4	806572	806739	168	59	0.621102	0.55782	0.0632819	340.587
NC_010454.4	806906	807035	130	23	0.737543	0.669696	0.067847	107.76
NC_010454.4	1038082	1038276	195	38	0.388803	0.480807	-0.0920037	-234.437
NC_010454.4	1103685	1103736	52	7	0.939903	0.89613	0.0437736	27.8945
NC_010454.4	1349122	1349177	56	5	0.362936	0.27714	0.0857955	23.5353
NC_010454.4	1448020	1448109	90	24	0.140138	0.0601243	0.0800133	198.993
NC_010454.4	1554202	1554300	99	26	0.650066	0.562437	0.0876281	121.509
NC_010454.4	1644459	1644579	121	24	0.214307	0.146482	0.0678245	139.293
NC_010454.4	1645459	1645592	134	16	0.2449	0.0811118	0.163788	171.797
NC_010454.4	2035003	2035056	54	20	0.327568	0.381377	-0.0538098	-93.3248
NC_010454.4	2930634	2930700	67	7	0.137488	0.290643	-0.153156	-29.2194
NC_010454.4	3071218	3071289	72	5	0.520963	0.283742	0.237221	21.8496
NC_010454.4	3098695	3098749	55	9	0.284292	0.159197	0.125095	40.6104
NC_010454.4	3112035	3112147	113	13	0.40768	0.655067	-0.247387	-102.434
NC_010454.4	3114557	3114635	79	14	0.24634	0.168124	0.0782165	72.4605
NC_010454.4	3169590	3169654	65	11	0.233228	0.161865	0.0713627	54.8057
NC_010454.4	3717915	3718017	103	12	0.218282	0.17024	0.0480419	70.8382
NC_010454.4	3906080	3906180	101	35	0.184815	0.144733	0.0400821	150.987
NC_010454.4	4347767	4347955	189	54	0.756114	0.819429	-0.0633148	-330.87
NC_010454.4	4357801	4357983	183	5	0.544635	0.741345	-0.196709	-25.9657
NC_010454.4	4369881	4369999	119	6	0.785231	0.519572	0.265659	32.1439
NC_010454.4	4514314	4514379	66	6	0.545761	0.770959	-0.225199	-30.6445
NC_010454.4	4938543	4938607	65	20	0.218655	0.157383	0.0612726	96.5885
NC_010454.4	4938783	4938879	97	29	0.241081	0.306536	-0.0654552	-151.8
NC_010454.4	4939016	4939129	114	30	0.173091	0.134652	0.0384383	147.981
NC_010454.4	5685178	5685530	353	67	0.230576	0.155405	0.0751708	452.181
NC_010454.4	5889254	5889310	57	11	0.780465	0.891101	-0.110635	-43.2084
NC_010454.4	7734788	7734855	68	6	0.519471	0.23787	0.281601	38.9769
NC_010454.4	8393828	8393947	120	9	0.536521	0.803094	-0.266573	-45.0592
NC_010454.4	10061219	10061284	66	13	0.584018	0.451418	0.1326	60.7146
NC_010454.4	10360749	10360842	94	8	0.187132	0.366835	-0.179703	-42.4978
NC_010454.4	11082959	11083133	175	46	0.695383	0.772277	-0.0768942	-233.635
NC_010454.4	12083296	12083359	64	7	0.237183	0.0799602	0.157223	37.504
NC_010454.4	15813698	15813808	111	38	0.537698	0.64373	-0.106032	-222.132
NC_010454.4	16119793	16119951	159	20	0.412462	0.541047	-0.128585	-109.47
NC_010454.4	18075350	18075446	97	7	0.131053	0.28116	-0.150107	-28.8738
NC_010454.4	18098477	18098554	78	6	0.721123	0.903007	-0.181883	-31.0257
NC_010454.4	18225429	18225507	79	14	0.0793913	0.0467952	0.032596	60.4895
NC_010454.4	18590706	18590769	64	8	0.15705	0.0874798	0.0695705	36.0178
NC_010454.4	18882495	18882606	112	19	0.596372	0.429413	0.166959	97.3749
NC_010454.4	18923671	18923842	172	11	0.338128	0.125082	0.213046	58.0225
NC_010454.4	19001172	19001261	90	14	0.931501	0.896252	0.0352488	70.3422
NC_010454.4	19166182	19166306	125	25	0.299537	0.422439	-0.122902	-114.589
NC_010454.4	19172226	19172382	157	29	0.855637	0.785883	0.0697539	141.167
NC_010454.4	21030649	21030721	73	4	0.278031	0.511899	-0.233869	-18.1478
NC_010454.4	21095290	21095351	62	5	0.212598	0.122361	0.0902372	23.5183
NC_010454.4	22063844	22063923	80	7	0.154593	0.250148	-0.0955552	-40.0301
NC_010454.4	22064249	22064407	159	27	0.21423	0.138717	0.0755129	151.378
NC_010454.4	22194999	22195109	111	14	0.168599	0.0951375	0.0734617	83.1237
NC_010454.4	22252659	22252848	190	26	0.249105	0.338209	-0.089104	-152.892
NC_010454.4	23646354	23646447	94	16	0.148467	0.0794086	0.069058	79.8087
NC_010454.4	24278098	24278182	85	16	0.594022	0.536825	0.0571979	89.7373
NC_010454.4	24835863	24835986	124	18	0.437504	0.352754	0.0847499	134.809
NC_010454.4	24871615	24871793	179	25	0.15014	0.268734	-0.118594	-164.72
NC_010454.4	24942217	24942270	54	5	0.63385	0.807566	-0.173716	-24.8851
NC_010454.4	25410390	25410440	51	6	0.450842	0.547987	-0.0971459	-31.8059
NC_010454.4	25769567	25769649	83	17	0.0554965	0.0306558	0.0248407	60.8384
NC_010454.4	26041786	26041843	58	9	0.589472	0.714658	-0.125186	-37.3062
NC_010454.4	26112317	26112391	75	13	0.648631	0.517888	0.130744	54.6749
NC_010454.4	26154647	26154702	56	10	0.593117	0.532621	0.0604959	47.4524
NC_010454.4	26791782	26791931	150	45	0.0985687	0.0657557	0.0328131	197.991
NC_010454.4	33409010	33409091	82	7	0.301974	0.153868	0.148105	31.6857
NC_010454.4	33699769	33699888	120	6	0.573229	0.420464	0.152765	31.7175
NC_010454.4	34207070	34207150	81	8	0.707857	0.348652	0.359206	71.0632
NC_010454.4	34657243	34657318	76	10	0.499134	0.737777	-0.238643	-55.3909
NC_010454.4	34784829	34784995	167	42	0.478877	0.54265	-0.0637731	-196.534
NC_010454.4	34785071	34785202	132	32	0.380141	0.286629	0.0935122	165.742
NC_010454.4	36878053	36878112	60	22	0.712563	0.822846	-0.110284	-114.19
NC_010454.4	36920233	36920358	126	15	0.176834	0.13813	0.0387033	72.5815
NC_010454.4	38442126	38442199	74	5	0.55927	0.44625	0.113021	36.8489
NC_010454.4	38571345	38571398	54	5	0.933446	0.867652	0.0657938	20.9891
NC_010454.4	43474024	43474172	149	57	0.631572	0.561626	0.069946	311.501
NC_010454.4	44827300	44827455	156	30	0.517153	0.43187	0.0852831	160.733
NC_010454.4	45181871	45181945	75	13	0.318858	0.450089	-0.13123	-54.9961
NC_010454.4	46327995	46328164	170	14	0.351806	0.191762	0.160044	99.5885
NC_010454.4	46738245	46738433	189	24	0.648149	0.776937	-0.128788	-154.959
NC_010454.4	47854099	47854257	159	45	0.473471	0.551785	-0.078314	-276.504
NC_010454.4	47931365	47931472	108	17	0.658489	0.577443	0.0810461	80.1282
NC_010454.4	48104719	48104825	107	22	0.128494	0.0397051	0.0887887	151.068
NC_010454.4	51501653	51501768	116	23	0.818632	0.857766	-0.0391337	-87.2839
NC_010454.4	52402376	52402487	112	12	0.663915	0.768659	-0.104744	-59.5825
NC_010454.4	52510535	52510627	93	11	0.555001	0.677577	-0.122575	-41.1719
NC_010454.4	52743508	52743633	126	32	0.202223	0.265694	-0.0634707	-163.721
NC_010454.4	52790460	52790518	59	4	0.958788	0.876032	0.0827562	18.1319
NC_010454.4	53165623	53165685	63	5	0.643088	0.711436	-0.0683484	-26.6127
NC_010454.4	53237059	53237185	127	22	0.332985	0.245228	0.0877568	100.464
NC_010454.4	53774373	53774447	75	10	0.677445	0.781934	-0.10449	-65.6974
NC_010454.4	53866613	53866706	94	8	0.106578	0.332639	-0.226061	-42.8578
NC_010454.4	53971042	53971113	72	21	0.169815	0.115898	0.0539173	198.293
NC_010454.4	54054300	54054353	54	12	0.135216	0.167053	-0.0318373	-56.4334
NC_010454.4	54089629	54089679	51	6	0.174549	0.139557	0.0349918	28.3908
NC_010454.4	54273742	54273842	101	12	0.547332	0.36692	0.180412	78.6718
NC_010454.4	54582108	54582233	126	17	0.851348	0.663281	0.188067	113.22
NC_010454.4	55084490	55084544	55	11	0.117331	0.226898	-0.109567	-42.3557
NC_010454.4	55704235	55704353	119	4	0.0515054	0.289064	-0.237558	-20.7391
NC_010454.4	55761195	55761280	86	10	0.254822	0.13976	0.115062	46.8701
NC_010454.4	55892455	55892520	66	9	0.283596	0.172075	0.11152	38.3469
NC_010454.4	56427019	56427084	66	14	0.600201	0.657263	-0.0570622	-77.7474
NC_010454.4	56659223	56659292	70	14	0.300862	0.476096	-0.175234	-76.8406
NC_010454.4	57050019	57050108	90	31	0.535804	0.462954	0.0728498	143.37
NC_010454.4	57248056	57248151	96	9	0.263594	0.481872	-0.218278	-43.5915
NC_010454.4	58127267	58127396	130	22	0.527662	0.653988	-0.126327	-121.904
NC_010454.4	58127595	58127695	101	21	0.500163	0.415021	0.0851419	138.938
NC_010454.4	58283605	58283700	96	7	0.772984	0.597713	0.17527	32.2907
NC_010454.4	58828231	58828293	63	8	0.173455	0.403008	-0.229553	-39.6914
NC_010454.4	58846423	58846491	69	7	0.197319	0.337223	-0.139904	-29.4861
NC_010454.4	59448845	59448989	145	23	0.226009	0.149025	0.0769842	117.43
NC_010454.4	59579355	59579445	91	8	0.256449	0.425741	-0.169292	-54.9204
NC_010454.4	60141309	60141360	52	7	0.784423	0.694465	0.0899578	30.6306
NC_010454.4	60420420	60420538	119	40	0.502953	0.42935	0.0736025	218.893
NC_010454.4	60494868	60494921	54	7	0.917234	0.867784	0.0494494	35.4798
NC_010454.4	60641955	60642627	673	54	0.420214	0.462523	-0.0423096	-113.834
NC_010454.4	60642920	60643111	192	9	0.403052	0.210066	0.192987	56.9393
NC_010454.4	60797806	60797951	146	45	0.902559	0.861293	0.0412659	235.211
NC_010454.4	60821411	60821528	118	25	0.202623	0.316732	-0.114109	-131.831
NC_010454.4	60877034	60877089	56	12	0.311096	0.216304	0.0947916	58.7827
NC_010454.4	60958325	60958383	59	8	0.110856	0.159107	-0.0482502	-38.9804
NC_010454.4	61138802	61138888	87	20	0.220364	0.126429	0.0939352	95.6911
NC_010454.4	61400219	61400287	69	16	0.157895	0.1139	0.0439949	86.0307
NC_010454.4	61449509	61449584	76	9	0.17317	0.0846078	0.0885622	37.5142
NC_010455.5	370363	370651	289	74	0.326924	0.235124	0.0918002	447.688
NC_010455.5	5417126	5417208	83	38	0.822321	0.889836	-0.0675147	-200.774
NC_010455.5	18243772	18243884	113	29	0.0853613	0.0520227	0.0333387	130.438
NC_010455.5	19197311	19197421	111	9	0.930539	0.712001	0.218538	55.3738
NC_010455.5	22040606	22040658	53	9	0.178839	0.141138	0.0377013	49.8879
NC_010455.5	23350994	23351070	77	6	0.195551	0.0490562	0.146494	29.8507
NC_010455.5	23561155	23561229	75	9	0.426081	0.271112	0.154969	37.2155
NC_010455.5	26584779	26584864	86	16	0.409748	0.278527	0.131221	78.9144
NC_010455.5	26941325	26941399	75	6	0.71048	0.43378	0.276699	33.9708
NC_010455.5	28406055	28406315	261	75	0.211321	0.168332	0.042989	393.819
NC_010455.5	28906870	28906977	108	20	0.561743	0.376207	0.185536	112.117
NC_010455.5	30403985	30404316	332	106	0.589897	0.53017	0.0597267	510.812
NC_010455.5	32217561	32217692	132	22	0.775984	0.615591	0.160393	157.352
NC_010455.5	32218243	32218434	192	16	0.676614	0.467525	0.209089	119.839
NC_010455.5	34370929	34371241	313	46	0.544926	0.287129	0.257797	529.08
NC_010455.5	34679169	34679481	313	56	0.20882	0.136353	0.0724672	306.489
NC_010455.5	36075270	36075344	75	5	0.255942	0.45854	-0.202598	-23.1303
NC_010455.5	36514842	36514916	75	9	0.280974	0.153057	0.127917	37.654
NC_010455.5	37671785	37671880	96	11	0.38567	0.557705	-0.172034	-49.2768
NC_010455.5	38657227	38657438	212	39	0.514823	0.371926	0.142897	253.2
NC_010455.5	39542630	39542728	99	7	0.3672	0.470834	-0.103634	-23.8539
NC_010455.5	43262452	43262564	113	14	0.760475	0.490897	0.269578	100.321
NC_010455.5	43952869	43952979	111	25	0.495537	0.336099	0.159438	164.836
NC_010455.5	43954422	43954512	91	24	0.537081	0.387464	0.149617	146.257
NC_010455.5	43954908	43954984	77	5	0.268709	0.484632	-0.215923	-24.0028
NC_010455.5	45968111	45968193	83	34	0.659548	0.844388	-0.18484	-344.534
NC_010455.5	47121195	47121320	126	8	0.879317	0.682826	0.196491	38.6741
NC_010455.5	47283426	47283490	65	4	0.226338	0.0433019	0.183036	18.9239
NC_010455.5	48026500	48026703	204	48	0.568553	0.423924	0.144629	385.157
NC_010455.5	51178855	51179083	229	32	0.328664	0.235045	0.0936185	170.177
NC_010455.5	53184501	53184596	96	20	0.753796	0.819116	-0.0653201	-97.6414
NC_010455.5	54205302	54205423	122	29	0.34754	0.244324	0.103217	209.349
NC_010455.5	66696675	66696737	63	5	0.300985	0.209908	0.0910771	24.9241
NC_010455.5	67675301	67675352	52	5	0.819242	0.70835	0.110892	19.8518
NC_010455.5	68995585	68995694	110	35	0.366836	0.305136	0.0616993	185.296
NC_010455.5	69723321	69723379	59	7	0.807118	0.724655	0.082463	30.873
NC_010455.5	70917150	70917215	66	7	0.445411	0.394118	0.0512933	41.5904
NC_010455.5	72195999	72196158	160	43	0.133464	0.0975604	0.0359035	207.695
NC_010455.5	72788619	72788693	75	7	0.366265	0.218377	0.147887	30.6377
NC_010455.5	79709909	79709968	60	11	0.523019	0.471503	0.0515158	38.5796
NC_010455.5	79710277	79710352	76	15	0.453522	0.377831	0.0756913	67.0471
NC_010455.5	84109630	84109727	98	10	0.277072	0.435421	-0.15835	-44.8091
NC_010455.5	87550211	87550285	75	8	0.504782	0.734685	-0.229904	-43.0687
NC_010455.5	87691642	87691833	192	38	0.208202	0.145007	0.0631943	189.186
NC_010455.5	87729664	87729784	121	31	0.236898	0.144204	0.0926938	208.856
NC_010455.5	94229394	94229461	68	8	0.744667	0.510442	0.234225	38.7465
NC_010455.5	101059520	101059733	214	33	0.552704	0.448141	0.104563	193.254
NC_010455.5	106574820	106574915	96	10	0.892961	0.732807	0.160154	48.9725
NC_010455.5	122130401	122130520	120	19	0.16594	0.113595	0.0523443	101.142
NC_010455.5	122536966	122537048	83	9	0.35785	0.560467	-0.202617	-46.9977
NC_010455.5	140947819	140948081	263	56	0.160906	0.106334	0.0545714	336.116
NC_010455.5	147179678	147179752	75	13	0.420959	0.606959	-0.186	-57.2554
NC_010455.5	169541604	169541706	103	16	0.11829	0.279765	-0.161474	-94.8015
NC_010455.5	178760456	178760531	76	14	0.144997	0.0686253	0.0763715	63.5528
NC_010455.5	179040035	179040138	104	15	0.141168	0.104284	0.0368846	52.6806
NC_010455.5	196067585	196067745	161	51	0.0637964	0.0306573	0.0331391	284.167
NC_010455.5	196067853	196067906	54	4	0.163519	0.0986557	0.0648629	17.9867
NC_010455.5	200082844	200082950	107	12	0.732524	0.547811	0.184713	60.123
NC_010455.5	200349196	200349383	188	32	0.773425	0.88411	-0.110686	-151.817
NC_010455.5	200353151	200353274	124	20	0.743484	0.816799	-0.0733156	-102.083
NC_010455.5	200363847	200364037	191	31	0.624988	0.50549	0.119498	143.999
NC_010455.5	201199511	201199575	65	12	0.212784	0.0684998	0.144284	74.7624
NC_010455.5	202526913	202526977	65	8	0.350835	0.398654	-0.0478182	-38.8857
NC_010455.5	202628206	202628326	121	13	0.675127	0.509817	0.16531	59.7639
NC_010455.5	206148887	206148980	94	14	0.543887	0.437994	0.105892	67.2759
NC_010455.5	206208394	206208447	54	5	0.930592	0.884864	0.0457283	22.2832
NC_010455.5	206356570	206356735	166	24	0.343857	0.242761	0.101097	134.581
NC_010455.5	206795230	206795281	52	9	0.535978	0.621467	-0.0854892	-47.9733
NC_010455.5	207073980	207074073	94	13	0.0946955	0.143586	-0.0488903	-49.2574
NC_010455.5	207408894	207408944	51	7	0.143851	0.0951298	0.048721	35.4861
NC_010455.5	207427394	207427540	147	25	0.437714	0.580415	-0.142701	-149.662
NC_010455.5	207802133	207802229	97	7	0.775176	0.520647	0.254529	38.8301
NC_010455.5	207856684	207856779	96	5	0.307511	0.105784	0.201727	30.9013
NC_010455.5	208185087	208185164	78	8	0.917026	0.758708	0.158318	43.9387
NC_010455.5	208217507	208217678	172	24	0.319457	0.187765	0.131692	173.696
NC_010456.5	16653	16779	127	15	0.216043	0.170071	0.0459722	56.6593
NC_010456.5	3014100	3014174	75	6	0.217989	0.397901	-0.179912	-30.3906
NC_010456.5	3034846	3035092	247	60	0.286165	0.195931	0.0902347	403.782
NC_010456.5	3036404	3036465	62	11	0.0804109	0.0464469	0.033964	50.1146
NC_010456.5	3036544	3036667	124	20	0.202942	0.106645	0.0962974	112.141
NC_010456.5	3197904	3198040	137	6	0.71242	0.342168	0.370252	33.5176
NC_010456.5	5521035	5521148	114	21	0.154047	0.220423	-0.0663759	-89.2068
NC_010456.5	5748326	5748383	58	9	0.334359	0.425235	-0.0908761	-39.5223
NC_010456.5	6284133	6284310	178	47	0.440125	0.557406	-0.117282	-279.48
NC_010456.5	6853545	6853648	104	19	0.513431	0.434677	0.0787541	98.1831
NC_010456.5	6948022	6948087	66	11	0.58735	0.657986	-0.0706364	-44.413
NC_010456.5	6949375	6949432	58	8	0.144316	0.239214	-0.0948979	-38.1872
NC_010456.5	7540612	7540681	70	10	0.0523079	0.0221827	0.0301252	47.2637
NC_010456.5	14380759	14380814	56	13	0.257547	0.195201	0.062346	58.4353
NC_010456.5	22459780	22459860	81	5	0.0766942	0.351722	-0.275027	-28.0531
NC_010456.5	22910656	22910812	157	40	0.42382	0.347927	0.0758927	206.734
NC_010456.5	24556695	24556825	131	4	0.0890925	0.356009	-0.266917	-18.0913
NC_010456.5	28650411	28650498	88	10	0.922299	0.745422	0.176877	48.8213
NC_010456.5	28726034	28726086	53	4	0.514084	0.219676	0.294408	24.9294
NC_010456.5	28726272	28726361	90	13	0.284101	0.35051	-0.0664084	-48.0769
NC_010456.5	29261302	29261376	75	9	0.343174	0.770556	-0.427382	-78.3695
NC_010456.5	30523810	30523890	81	18	0.779301	0.680787	0.0985134	83.3105
NC_010456.5	30524103	30524310	208	44	0.43784	0.356347	0.0814923	256.718
NC_010456.5	31485366	31485440	75	7	0.155927	0.303906	-0.14798	-30.479
NC_010456.5	32537243	32537392	150	20	0.267942	0.394814	-0.126873	-148.864
NC_010456.5	32566581	32566776	196	31	0.59216	0.519469	0.0726906	166.013
NC_010456.5	32923424	32923479	56	13	0.434422	0.37763	0.056792	64.4875
NC_010456.5	33587674	33587770	97	15	0.269011	0.152865	0.116146	95.7716
NC_010456.5	38438687	38438740	54	14	0.525036	0.360601	0.164434	65.0493
NC_010456.5	38845892	38845976	85	5	0.119033	0.0742021	0.0448308	46.4523
NC_010456.5	43122230	43122366	137	19	0.161999	0.11112	0.0508794	88.5772
NC_010456.5	44833551	44833614	64	6	0.87602	0.653302	0.222718	30.1277
NC_010456.5	45924679	45924770	92	28	0.731813	0.802579	-0.0707665	-148.669
NC_010456.5	47476626	47476683	58	16	0.109974	0.249631	-0.139657	-86.1751
NC_010456.5	47799366	47799487	122	30	0.466345	0.388723	0.0776223	171.165
NC_010456.5	48993462	48993544	83	8	0.041177	0.18854	-0.147363	-42.4614
NC_010456.5	49702762	49702824	63	22	0.883209	0.926986	-0.043777	-111.996
NC_010456.5	50380698	50380917	220	55	0.0337499	0.0885407	-0.0547908	-305.234
NC_010456.5	50812929	50813022	94	37	0.150929	0.118968	0.0319611	142.682
NC_010456.5	50969451	50969689	239	40	0.920055	0.805805	0.11425	231.183
NC_010456.5	51277716	51277791	76	9	0.105735	0.0420824	0.0636523	39.16
NC_010456.5	51289354	51289459	106	26	0.446705	0.531747	-0.085042	-128.803
NC_010456.5	51500447	51500546	100	6	0.917946	0.766122	0.151824	26.9103
NC_010456.5	54891511	54891608	98	32	0.257669	0.333595	-0.0759256	-153.233
NC_010456.5	58119268	58119324	57	21	0.310537	0.379213	-0.068676	-132.607
NC_010456.5	58291581	58291667	87	14	0.406246	0.243897	0.162349	89.7803
NC_010456.5	59303095	59303280	186	39	0.197274	0.134873	0.0624005	206.084
NC_010456.5	61306056	61306285	230	51	0.469674	0.342196	0.127477	586.633
NC_010456.5	74295492	74295578	87	28	0.611049	0.726848	-0.115799	-145.746
NC_010456.5	74693197	74693255	59	18	0.151604	0.113644	0.0379598	158.926
NC_010456.5	77934922	77934992	71	25	0.678773	0.755637	-0.0768644	-110.532
NC_010456.5	82377771	82377868	98	12	0.0382222	0.147316	-0.109094	-70.3228
NC_010456.5	87474053	87474126	74	13	0.551366	0.689166	-0.1378	-58.957
NC_010456.5	101367447	101367501	55	10	0.154644	0.117122	0.0375219	51.5886
NC_010456.5	101447271	101447366	96	10	0.602421	0.759833	-0.157413	-49.8716
NC_010456.5	105011388	105011462	75	7	0.625366	0.45771	0.167656	36.8353
NC_010456.5	107746665	107746744	80	11	0.441274	0.286586	0.154689	59.4703
NC_010456.5	107960837	107960902	66	12	0.190671	0.152731	0.0379401	61.9927
NC_010456.5	108034009	108034078	70	7	0.41436	0.230344	0.184016	33.2734
NC_010456.5	112599922	112599986	65	7	0.0788588	0.0384364	0.0404224	30.9294
NC_010456.5	113452634	113452757	124	11	0.470095	0.380447	0.0896479	53.5721
NC_010456.5	114575391	114575555	165	41	0.82784	0.745563	0.0822762	185.618
NC_010456.5	114682493	114682613	121	12	0.624216	0.486679	0.137537	58.7679
NC_010456.5	114776628	114776789	162	22	0.394025	0.483387	-0.0893615	-112.887
NC_010456.5	115217491	115217565	75	12	0.441033	0.245632	0.195401	76.8531
NC_010456.5	121467795	121467942	148	37	0.588261	0.718705	-0.130444	-255.727
NC_010456.5	121468751	121469078	328	71	0.343949	0.255329	0.0886197	472.22
NC_010456.5	123507818	123507872	55	16	0.461973	0.665749	-0.203776	-142.38
NC_010456.5	124586660	124586721	62	13	0.563233	0.67865	-0.115417	-66.6195
NC_010456.5	126942591	126942680	90	6	0.468314	0.244381	0.223933	34.2628
NC_010456.5	127660112	127660227	116	15	0.1904	0.123953	0.0664471	75.1587
NC_010456.5	127661211	127661327	117	22	0.0866769	0.0501002	0.0365767	100.461
NC_010456.5	129241391	129241509	119	15	0.364946	0.462047	-0.0971009	-63.4529
NC_010456.5	129661331	129661598	268	59	0.5376	0.436684	0.100915	504.588
NC_010456.5	132074437	132074554	118	11	0.228739	0.408898	-0.180159	-60.7134
NC_010456.5	132686030	132686202	173	34	0.475427	0.355852	0.119575	217.692
NC_010456.5	132698862	132699718	857	40	0.7836	0.684702	0.0988982	194.37
NC_010456.5	136175301	136175447	147	6	0.943859	0.72937	0.214489	28.2029
NC_010456.5	138103794	138103924	131	9	0.128448	0.31976	-0.191312	-48.9783
NC_010456.5	138934877	138934928	52	24	0.175617	0.135121	0.0404966	123.262
NC_010456.5	138938784	138938869	86	21	0.126331	0.0861151	0.0402159	85.8987
NC_010456.5	138939543	138939609	67	13	0.212149	0.169343	0.042806	58.8023
NC_010456.5	138939746	138939971	226	60	0.162076	0.0936714	0.0684048	535.316
NC_010456.5	139099146	139099284	139	15	0.484798	0.391935	0.0928627	75.2662
NC_010456.5	139206758	139206859	102	18	0.323243	0.209152	0.114091	112.349
NC_010456.5	139547009	139547096	88	13	0.174904	0.0928061	0.0820977	66.1355
NC_010456.5	139903273	139903391	119	16	0.217588	0.127023	0.0905657	71.1352
NC_010456.5	140221171	140221227	57	6	0.111429	0.178659	-0.0672299	-27.569
NC_010456.5	140628820	140628913	94	20	0.76711	0.839519	-0.0724085	-87.4902
NC_010456.5	140639222	140639275	54	8	0.55272	0.48978	0.0629401	40.2207
NC_010456.5	140667045	140667127	83	16	0.148746	0.0757253	0.073021	87.3349
NC_010456.5	140685076	140685289	214	16	0.614793	0.226678	0.388116	131.415
NC_010456.5	140723973	140724085	113	28	0.455942	0.325158	0.130784	177.54
NC_010456.5	140829167	140829275	109	9	0.549477	0.702395	-0.152918	-53.0417
NC_010456.5	140985706	140985835	130	11	0.603543	0.444388	0.159155	52.3403
NC_010456.5	141084458	141084517	60	8	0.466924	0.402978	0.0639463	58.8933
NC_010456.5	141231408	141231565	158	4	0.205342	0.422835	-0.217493	-19.9211
NC_010456.5	141297932	141298097	166	13	0.674008	0.493455	0.180553	80.6466
NC_010456.5	141298622	141298787	166	15	0.406837	0.276756	0.130081	82.779
NC_010456.5	141298927	141299076	150	8	0.127584	0.32429	-0.196707	-48.3541
NC_010456.5	141385622	141385812	191	10	0.824189	0.582177	0.242011	53.6579
NC_010457.5	20743680	20743759	80	4	0.299026	0.484156	-0.18513	-20.1926
NC_010457.5	21268043	21268117	75	9	0.0551032	0.132093	-0.0769896	-41.284
NC_010457.5	21474400	21474454	55	4	0.189933	0.359243	-0.16931	-18.9528
NC_010457.5	24490173	24490246	74	7	0.132371	0.2385	-0.106129	-31.4835
NC_010457.5	24756222	24756296	75	4	0.219252	0.0585247	0.160727	18.6261
NC_010457.5	25001764	25001828	65	6	0.781634	0.552662	0.228972	29.7403
NC_010457.5	25544173	25544234	62	9	0.189088	0.116588	0.0724995	38.3846
NC_010457.5	30901785	30901867	83	22	0.102557	0.0592846	0.0432727	98.4318
NC_010457.5	31004569	31004932	364	32	0.0706773	0.131002	-0.0603247	-131.281
NC_010457.5	40573232	40573327	96	11	0.0704423	0.17506	-0.104618	-52.0044
NC_010457.5	43523692	43523766	75	9	0.124489	0.268876	-0.144387	-37.5971
NC_010457.5	43787981	43788136	156	37	0.521983	0.431206	0.0907763	246.671
NC_010457.5	55491689	55491821	133	34	0.422871	0.346522	0.0763495	155.891
NC_010457.5	55492531	55492729	199	26	0.396072	0.513225	-0.117152	-183.875
NC_010457.5	57519172	57519329	158	19	0.250807	0.418377	-0.16757	-106.423
NC_010457.5	59067171	59067376	206	53	0.131849	0.0874837	0.0443649	328.874
NC_010457.5	62104031	62104099	69	9	0.419132	0.605798	-0.186666	-43.3946
NC_010457.5	66847460	66847554	95	23	0.144187	0.0964714	0.0477151	117.146
NC_010457.5	70394303	70394512	210	33	0.141543	0.0789649	0.0625779	217.591
NC_010457.5	78202142	78202205	64	21	0.621753	0.540815	0.0809381	93.594
NC_010457.5	79073419	79073520	102	7	0.0797608	0.214794	-0.135033	-28.8761
NC_010457.5	79197240	79197356	117	7	0.127061	0.33421	-0.20715	-36.3864
NC_010457.5	81942249	81942311	63	17	0.121976	0.0839452	0.0380309	80.3207
NC_010457.5	81958515	81958743	229	35	0.10132	0.219403	-0.118083	-249.107
NC_010457.5	81960677	81960803	127	15	0.645397	0.54345	0.101947	66.5019
NC_010457.5	81978779	81979216	438	85	0.197921	0.129984	0.0679368	745.753
NC_010457.5	81987761	81987844	84	18	0.125204	0.0866077	0.0385966	119.865
NC_010457.5	83408942	83408992	51	5	0.348454	0.060403	0.288051	30.2861
NC_010457.5	94274696	94274790	95	20	0.440234	0.310873	0.129362	100.962
NC_010457.5	101623586	101623690	105	27	0.250639	0.129531	0.121108	138.694
NC_010457.5	104904166	104904239	74	13	0.255621	0.166057	0.0895645	58.3511
NC_010457.5	105644938	105644989	52	8	0.174853	0.114503	0.0603502	42.6556
NC_010457.5	111146544	111146608	65	8	0.788747	0.569687	0.21906	38.2475
NC_010457.5	119599632	119599766	135	19	0.680707	0.538009	0.142697	91.33
NC_010457.5	121472852	121473001	150	7	0.389864	0.763036	-0.373173	-50.5673
NC_010457.5	121580371	121580472	102	37	0.585591	0.479472	0.106119	220.576
NC_010457.5	124319090	124319153	64	14	0.328908	0.404341	-0.0754338	-92.4495
NC_010457.5	124568513	124568681	169	42	0.181687	0.133023	0.0486649	246.684
NC_010457.5	130480594	130480667	74	8	0.593306	0.800231	-0.206925	-43.4908
NC_010457.5	131684874	131685000	127	8	0.559923	0.34308	0.216843	44.2209
NC_010457.5	132091606	132091666	61	9	0.803951	0.705714	0.0982366	35.961
NC_010457.5	132341503	132341620	118	14	0.289615	0.153425	0.13619	98.84
NC_010457.5	132432196	132432249	54	18	0.51948	0.382991	0.136489	95.547
NC_010457.5	132872563	132872615	53	6	0.679524	0.452041	0.227483	28.4895
NC_010457.5	132939512	132939600	89	13	0.327315	0.183978	0.143337	74.8715
NC_010457.5	133542699	133542777	79	13	0.724592	0.819418	-0.0948264	-52.2474
NC_010457.5	133557818	133558006	189	28	0.533574	0.393671	0.139903	172.025
NC_010457.5	133578765	133578916	152	12	0.533796	0.343233	0.190563	62.9997
NC_010457.5	134102418	134102533	116	6	0.648181	0.382801	0.265381	29.3663
NC_010457.5	135127867	135128071	205	30	0.461486	0.319069	0.142417	193.855
NC_010457.5	135464990	135465057	68	13	0.959663	0.928142	0.0315204	44.4453
NC_010457.5	135504974	135505084	111	18	0.474691	0.381075	0.0936153	83.6889
NC_010457.5	135593664	135593767	104	23	0.508843	0.625267	-0.116424	-107.705
NC_010457.5	136208203	136208313	111	7	0.260183	0.521603	-0.26142	-37.3747
NC_010457.5	136940322	136940396	75	9	0.222818	0.114071	0.108748	39.21
NC_010457.5	137849593	137849671	79	11	0.714072	0.841317	-0.127245	-56.4775
NC_010457.5	137969137	137969241	105	10	0.566208	0.264881	0.301327	91.3153
NC_010457.5	138018912	138019027	116	28	0.280345	0.202562	0.0777832	166.859
NC_010457.5	138257932	138258018	87	18	0.1251	0.180002	-0.0549016	-86.0462
NC_010457.5	138556493	138556575	83	12	0.655364	0.511682	0.143682	61.0226
NC_010457.5	138976405	138976461	57	10	0.379725	0.267548	0.112177	55.4119
NC_010457.5	139423001	139423158	158	20	0.369208	0.248879	0.120329	92.1473
NC_010457.5	139434246	139434388	143	18	0.602782	0.497695	0.105087	85.0738
NC_010457.5	139720690	139720790	101	24	0.0960279	0.19696	-0.100932	-159.532
NC_010457.5	139795133	139795268	136	33	0.485679	0.396186	0.0894934	198.849
NC_010457.5	139821103	139821166	64	28	0.22486	0.136096	0.0887641	139.413
NC_010457.5	140335108	140335332	225	58	0.333311	0.256454	0.0768569	341.027
NC_010458.4	4784387	4784437	51	12	0.131987	0.0605032	0.0714839	61.6172
NC_010458.4	12570447	12570521	75	10	0.675825	0.492647	0.183178	46.8632
NC_010458.4	20700164	20700238	75	9	0.398706	0.232106	0.1666	42.225
NC_010458.4	21851777	21851883	107	13	0.745369	0.552092	0.193277	67.4366
NC_010458.4	22965345	22965447	103	19	0.436476	0.541844	-0.105368	-102.812
NC_010458.4	27126735	27126790	56	20	0.688033	0.522731	0.165302	102.519
NC_010458.4	32806230	32806280	51	14	0.201265	0.150603	0.0506614	142.584
NC_010458.4	34378170	34378305	136	33	0.300952	0.395443	-0.0944914	-159.166
NC_010458.4	50987881	50987950	70	16	0.174166	0.133388	0.0407783	83.667
NC_010458.4	50988031	50988109	79	10	0.19673	0.15052	0.0462105	55.3325
NC_010458.4	50999486	50999583	98	9	0.775294	0.616793	0.158501	47.8553
NC_010458.4	51085921	51086022	102	13	0.141954	0.0619789	0.079975	63.2326
NC_010458.4	55177472	55177536	65	9	0.813274	0.6411	0.172175	42.9929
NC_010458.4	55563864	55563994	131	6	0.2848	0.545218	-0.260418	-29.3909
NC_010458.4	68351064	68351166	103	15	0.719609	0.825735	-0.106126	-72.4191
NC_010458.4	74729449	74729609	161	33	0.4986	0.627193	-0.128593	-159.424
NC_010458.4	74729701	74729752	52	4	0.584977	0.529979	0.0549978	22.9774
NC_010458.4	74730322	74730373	52	12	0.437506	0.382018	0.0554878	60.8413
NC_010458.4	77108012	77108097	86	4	0.452134	0.129663	0.322471	22.0936
NC_010458.4	77666841	77666916	76	10	0.19801	0.412554	-0.214543	-49.1613
NC_010458.4	77714027	77714084	58	8	0.269577	0.126118	0.14346	41.449
NC_010458.4	77780799	77780922	124	11	0.685838	0.479299	0.206539	57.0085
NC_010458.4	78000741	78000801	61	13	0.345959	0.454651	-0.108693	-65.9024
NC_010458.4	78668612	78668675	64	15	0.413125	0.553129	-0.140004	-65.9779
NC_010458.4	78961597	78961692	96	19	0.348241	0.207184	0.141056	105.445
NC_010458.4	79085572	79085625	54	7	0.759884	0.557443	0.20244	35.47
NC_010458.4	79194256	79194346	91	6	0.199747	0.341129	-0.141382	-30.4398
NC_010458.4	79234073	79234132	60	11	0.545242	0.655897	-0.110655	-51.6943
NC_010458.4	79264718	79264774	57	7	0.601224	0.534206	0.0670178	48.3678
NC_010458.4	79267831	79267949	119	23	0.891082	0.805462	0.0856201	100.56
NC_010458.4	79268606	79268786	181	19	0.93435	0.72179	0.21256	141.505
NC_010458.4	79270223	79270473	251	44	0.605847	0.481244	0.124602	256.878
NC_010458.4	79275428	79275501	74	14	0.325974	0.168646	0.157328	77.1804
NC_010458.4	79524467	79524519	53	9	0.547531	0.689166	-0.141635	-41.7624
NC_010458.4	79674102	79674225	124	17	0.277481	0.198603	0.078878	82.3316
NC_010459.5	2471466	2471541	76	14	0.382618	0.248494	0.134124	69.6243
NC_010459.5	2518039	2518118	80	12	0.433635	0.296332	0.137303	70.4847
NC_010459.5	2597169	2597242	74	11	0.542059	0.413333	0.128726	50.3562
NC_010459.5	8449755	8449811	57	12	0.0229871	0.0477395	-0.0247523	-60.5166
NC_010459.5	8662333	8662383	51	5	0.710075	0.505525	0.204551	24.1411
NC_010459.5	9609123	9609219	97	11	0.362545	0.525566	-0.163022	-56.5116
NC_010459.5	13299237	13299299	63	5	0.603662	0.795194	-0.191531	-20.7464
NC_010459.5	16371657	16371731	75	6	0.289035	0.48415	-0.195115	-31.6112
NC_010459.5	17916328	17916439	112	23	0.0904488	0.0591282	0.0313206	108.37
NC_010459.5	25877618	25877689	72	7	0.345202	0.185423	0.159779	30.8356
NC_010459.5	28030139	28030294	156	25	0.174081	0.119154	0.0549273	145.501
NC_010459.5	28379714	28379765	52	12	0.729273	0.828326	-0.0990531	-62.1049
NC_010459.5	28416629	28416698	70	5	0.38983	0.698027	-0.308196	-25.6433
NC_010459.5	32446957	32447051	95	27	0.548885	0.49914	0.0497452	142.288
NC_010459.5	32575512	32575627	116	35	0.135314	0.100455	0.0348583	178.63
NC_010459.5	33968546	33968792	247	20	0.404621	0.259639	0.144982	168.491
NC_010459.5	34625139	34625214	76	10	0.0396056	0.091511	-0.0519054	-63.858
NC_010459.5	34884835	34885013	179	50	0.0689536	0.039636	0.0293176	315.252
NC_010459.5	35515776	35515952	177	15	0.307023	0.142113	0.16491	99.7173
NC_010459.5	36199778	36199882	105	12	0.090741	0.248002	-0.157261	-63.8017
NC_010459.5	36200749	36200870	122	26	0.137796	0.100318	0.0374781	169.006
NC_010459.5	37958030	37958103	74	13	0.921353	0.891639	0.0297146	42.9908
NC_010459.5	39840501	39840556	56	5	0.287673	0.250054	0.0376193	19.5305
NC_010459.5	40171885	40171972	88	18	0.784654	0.673089	0.111565	90.9614
NC_010459.5	41197735	41197821	87	12	0.153894	0.267175	-0.113281	-70.3124
NC_010459.5	41474547	41474644	98	6	0.795297	0.951415	-0.156117	-27.4136
NC_010459.5	46136177	46136237	61	20	0.520459	0.57061	-0.0501503	-130.704
NC_010459.5	47235123	47235229	107	36	0.768851	0.831108	-0.0622575	-189.957
NC_010459.5	47723930	47723995	66	4	0.169556	0.120323	0.0492338	24.2783
NC_010459.5	47833947	47834098	152	12	0.421439	0.590937	-0.169498	-60.8852
NC_010459.5	48228432	48229145	714	45	0.151627	0.0980261	0.0536007	327.317
NC_010459.5	48471565	48471705	141	25	0.686501	0.748368	-0.061867	-103.987
NC_010459.5	49729375	49729478	104	8	0.427044	0.682037	-0.254992	-54.9563
NC_010459.5	52162819	52162899	81	13	0.0507205	0.0885574	-0.0378369	-56.3406
NC_010459.5	52276039	52276101	63	7	0.0930688	0.151809	-0.0587403	-30.2362
NC_010459.5	52689211	52689291	81	14	0.153929	0.0877231	0.066206	90.4295
NC_010459.5	53103326	53103377	52	7	0.536643	0.711948	-0.175305	-35.084
NC_010459.5	54815018	54815176	159	8	0.19321	0.429495	-0.236285	-39.5703
NC_010459.5	57720394	57720602	209	9	0.219104	0.0488944	0.170209	56.4446
NC_010459.5	57844877	57844947	71	4	0.488629	0.279474	0.209154	20.813
NC_010459.5	58514227	58514292	66	10	0.0279032	0.0524718	-0.0245686	-50.7501
NC_010459.5	58837955	58838007	53	4	0.471903	0.433338	0.0385648	24.0645
NC_010459.5	58985456	58985634	179	42	0.486875	0.41715	0.0697251	263.936
NC_010459.5	59031206	59031316	111	32	0.658069	0.740159	-0.0820899	-161.971
NC_010459.5	59034301	59034430	130	24	0.0745607	0.0476553	0.0269054	128.371
NC_010459.5	59149242	59149603	362	49	0.281005	0.19566	0.0853455	314.478
NC_010459.5	59262294	59262358	65	7	0.250113	0.12876	0.121352	30.9882
NC_010459.5	60306276	60306387	112	19	0.254978	0.34087	-0.0858929	-79.3913
NC_010459.5	60330693	60330752	60	9	0.0376593	0.0598445	-0.0221852	-38.6906
NC_010459.5	60458339	60458583	245	16	0.155075	0.0466944	0.108381	99.1377
NC_010459.5	61400070	61400160	91	13	0.593139	0.694736	-0.101597	-60.6418
NC_010459.5	61430888	61430997	110	22	0.404962	0.253739	0.151223	141.382
NC_010459.5	61827014	61827082	69	19	0.495318	0.616456	-0.121138	-143.768
NC_010459.5	61832652	61832707	56	16	0.0911522	0.117523	-0.0263711	-79.339
NC_010459.5	62144603	62144792	190	30	0.277133	0.189423	0.08771	208.021
NC_010459.5	62203931	62203992	62	17	0.20063	0.121727	0.0789028	98.3371
NC_010459.5	62470862	62470935	74	16	0.395834	0.293523	0.102311	100.583
NC_010459.5	62635609	62635685	77	18	0.788739	0.838906	-0.0501663	-86.211
NC_010459.5	62636158	62636413	256	59	0.444364	0.358925	0.0854389	451.225
NC_010459.5	62709779	62709965	187	59	0.0761033	0.107014	-0.0309107	-249.681
NC_010459.5	62865522	62865629	108	21	0.461	0.612461	-0.151461	-109.067
NC_010459.5	62875264	62875320	57	8	0.153367	0.0912243	0.0621425	40.6058
NC_010459.5	62991491	62991639	149	11	0.890923	0.732315	0.158609	78.6685
NC_010460.4	1189542	1189694	153	15	0.111904	0.281948	-0.170044	-88.1195
NC_010460.4	1969057	1969214	158	37	0.220256	0.166677	0.0535794	178.397
NC_010460.4	3329332	3329393	62	11	0.293382	0.153126	0.140255	55.7419
NC_010460.4	3471585	3471648	64	9	0.232724	0.412442	-0.179719	-44.4861
NC_010460.4	5593838	5593936	99	14	0.679705	0.527227	0.152478	61.5475
NC_010460.4	6059090	6059215	126	24	0.577069	0.46783	0.109239	142.764
NC_010460.4	6110637	6110738	102	18	0.535976	0.642474	-0.106498	-104.075
NC_010460.4	6161570	6161633	64	4	0.751744	0.521981	0.229763	18.4979
NC_010460.4	6205401	6205584	184	67	0.552329	0.490278	0.062051	387.602
NC_010460.4	6277776	6277908	133	19	0.658244	0.57395	0.084294	78.8727
NC_010460.4	6475656	6475707	52	18	0.211313	0.126738	0.0845747	98.0177
NC_010460.4	6893130	6893215	86	16	0.347132	0.251275	0.0958571	71.3342
NC_010460.4	7348423	7348485	63	6	0.301131	0.409737	-0.108607	-31.3671
NC_010460.4	9530566	9530655	90	11	0.540703	0.454269	0.086434	44.6159
NC_010460.4	18346375	18346559	185	32	0.468689	0.325867	0.142822	255.325
NC_010460.4	18976065	18976142	78	7	0.593652	0.492409	0.101243	32.999
NC_010460.4	19690431	19690628	198	34	0.127702	0.0695615	0.0581408	180.392
NC_010460.4	19817768	19817892	125	16	0.549698	0.732215	-0.182517	-90.6732
NC_010460.4	23808930	23808984	55	9	0.582716	0.433654	0.149062	40.8892
NC_010460.4	26194049	26194120	72	6	0.0474318	0.33023	-0.282798	-40.1933
NC_010460.4	29680918	29680968	51	9	0.434052	0.574892	-0.14084	-35.7463
NC_010460.4	29706695	29706843	149	37	0.402226	0.48702	-0.0847945	-219.057
NC_010460.4	36786575	36786637	63	17	0.158348	0.113474	0.044874	64.7342
NC_010460.4	42925173	42925230	58	16	0.104788	0.19352	-0.0887324	-76.8759
NC_010460.4	42925442	42925496	55	17	0.118563	0.0863818	0.0321812	84.4081
NC_010460.4	42925562	42925614	53	11	0.241505	0.178021	0.0634834	44.2068
NC_010460.4	43432708	43432831	124	6	0.762266	0.474464	0.287802	30.3295
NC_010460.4	43508731	43508893	163	35	0.269778	0.361027	-0.0912488	-157.078
NC_010460.4	43509166	43509219	54	14	0.396484	0.337744	0.0587396	84.7757
NC_010460.4	44729882	44729943	62	8	0.619915	0.807582	-0.187666	-42.4999
NC_010460.4	45373861	45374298	438	104	0.392856	0.284716	0.108141	746.317
NC_010460.4	45403773	45403832	60	8	0.0984457	0.077864	0.0205817	39.3685
NC_010460.4	45404526	45404672	147	10	0.454601	0.350586	0.104015	50.5505
NC_010460.4	45408418	45408469	52	6	0.846071	0.888841	-0.0427702	-40.664
NC_010460.4	45425983	45426050	68	11	0.111536	0.0659633	0.0455731	60.5788
NC_010460.4	45430441	45430666	226	67	0.335183	0.448138	-0.112955	-504.802
NC_010460.4	45430757	45430819	63	21	0.249933	0.127641	0.122292	137.814
NC_010460.4	45431633	45431686	54	10	0.236757	0.178255	0.0585022	50.0518
NC_010460.4	45451498	45451664	167	41	0.305787	0.247228	0.0585589	209.433
NC_010460.4	45466709	45466866	158	16	0.592726	0.479295	0.113431	85.8185
NC_010460.4	45471301	45471439	139	50	0.206867	0.142934	0.0639336	368.979
NC_010460.4	46561421	46561491	71	4	0.162819	0.459098	-0.296279	-21.4731
NC_010460.4	49094417	49094520	104	29	0.269332	0.177187	0.0921445	190.941
NC_010460.4	49094767	49094869	103	21	0.553037	0.411254	0.141784	106.186
NC_010460.4	55271845	55271934	90	9	0.58627	0.49502	0.0912501	42.7287
NC_010460.4	55605938	55605994	57	17	0.445473	0.532976	-0.0875036	-69.7565
NC_010461.5	6815559	6815725	167	38	0.145056	0.0946439	0.0504121	179.832
NC_010461.5	6816011	6816161	151	14	0.185989	0.0708776	0.115111	81.0253
NC_010461.5	6835028	6835085	58	8	0.830599	0.885722	-0.0551233	-48.5162
NC_010461.5	6864620	6864752	133	19	0.788862	0.873814	-0.0849516	-98.2529
NC_010461.5	6913644	6913789	146	7	0.772125	0.41358	0.358545	45.052
NC_010461.5	8519248	8519439	192	36	0.13668	0.298468	-0.161788	-325.283
NC_010461.5	8519614	8519714	101	39	0.238351	0.183867	0.0544841	188.652
NC_010461.5	8542395	8542533	139	29	0.762939	0.846025	-0.0830858	-157.541
NC_010461.5	10582136	10582191	56	21	0.256502	0.190385	0.0661164	101.274
NC_010461.5	11409068	11409365	298	62	0.153082	0.0895531	0.0635288	384.047
NC_010461.5	12033025	12033219	195	57	0.290868	0.189627	0.10124	432.842
NC_010461.5	13213027	13213350	324	49	0.228009	0.12545	0.102559	342.175
NC_010461.5	13316319	13316397	79	31	0.15306	0.109509	0.0435513	150.971
NC_010461.5	13413365	13413591	227	56	0.128287	0.0753528	0.0529341	315.91
NC_010461.5	13415344	13415421	78	12	0.83249	0.637255	0.195235	70.2244
NC_010461.5	14210225	14210365	141	37	0.113799	0.0687741	0.0450252	176.807
NC_010461.5	14815453	14815527	75	6	0.353986	0.135368	0.218618	29.387
NC_010461.5	14822498	14822681	184	64	0.746817	0.825267	-0.0784504	-348.158
NC_010461.5	15141394	15141484	91	13	0.490069	0.763558	-0.273488	-90.2651
NC_010461.5	15292015	15292179	165	41	0.880499	0.820415	0.0600839	182.357
NC_010461.5	15298998	15299072	75	6	0.848142	0.657329	0.190813	29
NC_010461.5	16223534	16223711	178	42	0.26181	0.139456	0.122354	275.334
NC_010461.5	16224156	16224260	105	34	0.131173	0.0878318	0.043341	156.124
NC_010461.5	16574452	16574611	160	25	0.160001	0.0926594	0.0673417	143.824
NC_010461.5	16576830	16576881	52	10	0.162238	0.102939	0.0592986	63.4485
NC_010461.5	17560903	17561016	114	34	0.148988	0.216428	-0.0674398	-191.823
NC_010461.5	18118164	18118354	191	44	0.122739	0.167771	-0.0450318	-221.201
NC_010461.5	18118918	18119075	158	40	0.286898	0.196614	0.0902839	216.216
NC_010461.5	19835323	19835375	53	8	0.828277	0.589007	0.239271	40.1205
NC_010461.5	20017638	20017695	58	15	0.129711	0.187979	-0.0582675	-71.1703
NC_010461.5	20017842	20017953	112	27	0.16274	0.110687	0.0520526	141.762
NC_010461.5	20876924	20876991	68	16	0.828353	0.634015	0.194338	87.9139
NC_010461.5	21047922	21047998	77	17	0.729974	0.833205	-0.103231	-73.4096
NC_010461.5	21077551	21077656	106	23	0.158475	0.104151	0.0543244	118.272
NC_010461.5	26470476	26470742	267	44	0.182943	0.0663273	0.116616	374.592
NC_010461.5	33058102	33058187	86	10	0.237149	0.48691	-0.249761	-62.6138
NC_010461.5	33485013	33485079	67	7	0.225833	0.353243	-0.127411	-33.8586
NC_010461.5	34296157	34296297	141	16	0.61837	0.258665	0.359704	147.757
NC_010461.5	34296588	34296638	51	13	0.0427978	0.148253	-0.105455	-67.5943
NC_010461.5	34522882	34522953	72	17	0.154915	0.103002	0.051913	75.0147
NC_010461.5	34764322	34764407	86	21	0.798283	0.859112	-0.0608288	-109.209
NC_010461.5	35395386	35395460	75	4	0.194936	0.521641	-0.326704	-22.3193
NC_010461.5	35628426	35628516	91	5	0.563169	0.839569	-0.2764	-25.1225
NC_010461.5	35741724	35741831	108	17	0.281053	0.205303	0.0757494	72.835
NC_010461.5	35799981	35800133	153	6	0.517415	0.911995	-0.39458	-45.2077
NC_010461.5	35806415	35806668	254	28	0.575959	0.355128	0.220831	241.6
NC_010461.5	35810520	35810758	239	27	0.324216	0.0812366	0.242979	237.592
NC_010461.5	35812552	35812645	94	36	0.123426	0.05571	0.0677158	218.563
NC_010461.5	35821376	35821428	53	6	0.18033	0.140868	0.0394615	29.7812
NC_010461.5	37046171	37046268	98	10	0.352755	0.742631	-0.389876	-85.5558
NC_010461.5	37064260	37064326	67	9	0.199027	0.366882	-0.167855	-42.0177
NC_010461.5	37536411	37536579	169	40	0.14029	0.0470763	0.0932136	316.649
NC_010461.5	40681444	40681556	113	23	0.19173	0.124355	0.0673752	102.685
NC_010461.5	41726151	41726230	80	19	0.623972	0.464147	0.159825	96.3214
NC_010461.5	41836214	41836439	226	68	0.1822	0.107111	0.0750891	513.264
NC_010461.5	42142334	42142409	76	21	0.161226	0.0970184	0.0642071	84.5321
NC_010461.5	42473175	42473262	88	13	0.159043	0.110221	0.0488224	54.6565
NC_010461.5	42536747	42536811	65	4	0.625035	0.424708	0.200327	21.6147
NC_010461.5	42609620	42609670	51	9	0.104563	0.0597242	0.0448393	41.3506
NC_010461.5	42798262	42798484	223	82	0.198181	0.104818	0.0933626	470.326
NC_010461.5	42895841	42895927	87	9	0.849068	0.708968	0.1401	41.9708
NC_010461.5	42998738	42998903	166	23	0.0339034	0.102105	-0.0682014	-117.668
NC_010461.5	43028264	43028671	408	102	0.140082	0.0845631	0.0555193	606.338
NC_010461.5	43128891	43128950	60	9	0.0398837	0.149164	-0.10928	-49.069
NC_010461.5	43129103	43129175	73	19	0.118413	0.0647308	0.0536824	99.7078
NC_010461.5	43141751	43141872	122	16	0.931456	0.809028	0.122428	102.785
NC_010461.5	43150175	43150345	171	46	0.175562	0.106937	0.068625	308.09
NC_010461.5	43215667	43215876	210	36	0.154945	0.059824	0.0951205	277.785
NC_010461.5	43230230	43230300	71	14	0.159482	0.0928625	0.0666192	61.903
NC_010461.5	43630089	43630260	172	6	0.527315	0.88517	-0.357855	-37.289
NC_010461.5	43645438	43645594	157	17	0.750112	0.885126	-0.135014	-86.4039
NC_010461.5	46094978	46095212	235	66	0.158535	0.0831601	0.0753749	556.099
NC_010461.5	46214554	46214625	72	9	0.90934	0.779912	0.129428	42.7647
NC_010461.5	46758502	46758705	204	38	0.0915838	0.200114	-0.10853	-273.468
NC_010461.5	47862307	47862507	201	28	0.167938	0.300897	-0.132959	-147.619
NC_010461.5	48286581	48286689	109	19	0.147749	0.0883496	0.0593996	87.0286
NC_010461.5	48948345	48948432	88	14	0.130629	0.0746599	0.0559694	66.2138
NC_010461.5	50862993	50863053	61	5	0.319106	0.190395	0.12871	36.9148
NC_010461.5	55630011	55630198	188	30	0.745617	0.589123	0.156494	243.379
NC_010461.5	55631021	55631190	170	49	0.632973	0.755133	-0.122161	-353.026
NC_010461.5	56482106	56482244	139	25	0.107725	0.20043	-0.0927046	-136.317
NC_010461.5	57108338	57108531	194	42	0.112157	0.0521052	0.0600517	265.463
NC_010461.5	57382620	57382696	77	18	0.228877	0.125771	0.103106	94.4058
NC_010461.5	57520943	57521119	177	29	0.12514	0.057785	0.0673548	170.2
NC_010461.5	58117658	58117726	69	14	0.132765	0.0569692	0.0757953	66.6061
NC_010461.5	58183686	58183894	209	47	0.190938	0.117734	0.073204	264.838
NC_010461.5	59919982	59920263	282	78	0.345309	0.191036	0.154273	666.715
NC_010461.5	60119365	60119463	99	15	0.0820408	0.0481516	0.0338892	57.6141
NC_010461.5	60119860	60119968	109	29	0.18324	0.0943269	0.0889127	178.482
NC_010461.5	64303181	64303350	170	23	0.800273	0.671895	0.128379	129.204
NC_010461.5	67415021	67415100	80	10	0.0560624	0.247273	-0.191211	-70.7682
NC_010461.5	77767222	77767376	155	10	0.236823	0.0865959	0.150227	56.6004
NC_010461.5	82508675	82508727	53	14	0.191315	0.142289	0.0490255	62.775
NC_010461.5	83018452	83018557	106	14	0.129216	0.347936	-0.21872	-105.489
NC_010461.5	84872053	84872204	152	24	0.167423	0.0861542	0.0812683	125.701
NC_010461.5	84936913	84937185	273	94	0.119293	0.0645707	0.0547224	583.909
NC_010461.5	87426573	87426751	179	46	0.152954	0.0811933	0.0717608	255.34
NC_010461.5	88293387	88293439	53	4	0.181581	0.131137	0.0504439	20.1609
NC_010461.5	88389918	88390037	120	9	0.898716	0.750046	0.14867	41.8725
NC_010461.5	90023584	90023742	159	10	0.568619	0.272323	0.296296	58.1951
NC_010461.5	90105868	90105925	58	10	0.231616	0.127179	0.104437	106.96
NC_010461.5	90419441	90419587	147	29	0.120935	0.0737396	0.0471954	149.956
NC_010461.5	90420036	90420509	474	77	0.178188	0.0628647	0.115324	835.431
NC_010461.5	90826585	90826642	58	15	0.0836947	0.0425021	0.0411925	70.3446
NC_010461.5	91644911	91645269	359	43	0.181478	0.274309	-0.0928312	-71.5799
NC_010461.5	95135470	95135556	87	12	0.262893	0.125513	0.13738	89.6611
NC_010461.5	96744490	96744855	366	64	0.198765	0.131187	0.0675783	335.065
NC_010461.5	97068136	97068223	88	17	0.476879	0.362504	0.114375	84.8807
NC_010461.5	97496217	97496304	88	17	0.15729	0.0879842	0.0693055	79.043
NC_010461.5	97736128	97736192	65	7	0.19198	0.109641	0.0823389	31.6788
NC_010461.5	97919229	97919325	97	34	0.110972	0.187036	-0.0760645	-231.007
NC_010461.5	98104725	98104900	176	39	0.157137	0.0952832	0.0618538	220.311
NC_010461.5	98181116	98181215	100	23	0.115925	0.0781956	0.0377297	93.7733
NC_010461.5	98231439	98231560	122	24	0.133915	0.056096	0.077819	154.863
NC_010461.5	100828093	100828152	60	10	0.237786	0.158596	0.0791896	55.2858
NC_010461.5	101477611	101477760	150	26	0.178175	0.0820155	0.09616	178.35
NC_010461.5	106070068	106070136	69	7	0.761269	0.613764	0.147506	26.7641
NC_010461.5	106115493	106115600	108	23	0.151434	0.0907588	0.0606755	114.045
NC_010461.5	106135562	106135637	76	27	0.0627103	0.0334198	0.0292905	103.118
NC_010461.5	106371991	106372099	109	11	0.18599	0.0925688	0.0934213	47.4889
NC_010461.5	106817094	106817165	72	8	0.0306731	0.14654	-0.115867	-35.8255
NC_010461.5	108903242	108903295	54	6	0.194871	0.517071	-0.322201	-32.5219
NC_010461.5	109069117	109069261	145	31	0.373378	0.486422	-0.113044	-136.746
NC_010461.5	110392321	110392375	55	23	0.121315	0.171715	-0.0504003	-108.579
NC_010461.5	111736292	111736364	73	11	0.735428	0.842427	-0.106999	-48.5421
NC_010461.5	114586586	114586660	75	9	0.34476	0.185022	0.159738	41.2644
NC_010461.5	121702255	121702350	96	9	0.317289	0.538315	-0.221025	-47.7223
NC_010461.5	122001204	122001315	112	11	0.199576	0.0973019	0.102275	46.6038
NC_010461.5	122673650	122673760	111	7	0.180175	0.0969581	0.0832172	29.0217
NC_010461.5	124311510	124311603	94	18	0.504859	0.654217	-0.149359	-87.3026
NC_010461.5	124605333	124605463	131	19	0.707645	0.793251	-0.085606	-86.2845
NC_010461.5	124605915	124606112	198	33	0.68369	0.771154	-0.0874634	-170.413
NC_010461.5	124638126	124638238	113	13	0.255561	0.143703	0.111857	64.6784
NC_010461.5	124726483	124726659	177	27	0.788727	0.694983	0.0937436	126.663
NC_010461.5	125121147	125121214	68	7	0.719237	0.396846	0.322391	36.2587
NC_010461.5	125528935	125529009	75	12	0.301066	0.153939	0.147127	58.8861
NC_010462.3	6650384	6650458	75	6	0.204	0.436956	-0.232956	-34.2405
NW_018084804.1	304084	304163	80	16	0.622871	0.793551	-0.17068	-102.795
NW_018084833.1	319800	319876	77	19	0.599253	0.468757	0.130496	115.662
NW_018084833.1	503971	504070	100	22	0.181955	0.0970386	0.0849165	113.202
NW_018084833.1	671086	671261	176	22	0.523268	0.362566	0.160702	177.471
NW_018084833.1	674725	674824	100	13	0.722372	0.842824	-0.120452	-57.5162
NW_018084833.1	727439	727554	116	38	0.0798151	0.0554273	0.0243878	174.267
NW_018084833.1	853140	853278	139	22	0.185876	0.117906	0.0679704	124.514
NW_018084833.1	959702	959869	168	28	0.860598	0.782843	0.0777545	135.672
NW_018084833.1	977835	978121	287	46	0.935755	0.839735	0.0960199	409.634
NW_018084833.1	1028140	1028256	117	37	0.583091	0.504167	0.0789236	208.411
NW_018084833.1	1346411	1346472	62	13	0.700241	0.639313	0.0609279	77.4091
NW_018084833.1	1495553	1495686	134	29	0.591846	0.710956	-0.11911	-139.694
NW_018084833.1	1499134	1499243	110	19	0.531286	0.655632	-0.124345	-82.6933
NW_018084833.1	1591047	1591292	246	34	0.107993	0.193846	-0.0858523	-179.225
NW_018084833.1	1761537	1761686	150	23	0.262104	0.181013	0.0810909	101.869
NW_018084833.1	1800610	1800684	75	18	0.583387	0.437651	0.145736	97.7653
NW_018084833.1	1860581	1860677	97	16	0.493025	0.648883	-0.155858	-73.5722
NW_018084833.1	1957457	1957569	113	13	0.524348	0.366015	0.158333	59.0712
NW_018084859.1	5873	6011	139	9	0.343737	0.633997	-0.290261	-65.0202
NW_018084866.1	170929	170995	67	11	0.26047	0.335261	-0.0747915	-60.961
NW_018084866.1	198387	198437	51	7	0.267486	0.548055	-0.280568	-38.6844
NW_018084874.1	304669	304721	53	8	0.098271	0.160443	-0.0621721	-37.1357
NW_018084884.1	14022	14076	55	5	0.682697	0.510346	0.172351	24.9191
NW_018084901.1	509895	509987	93	14	0.391928	0.585301	-0.193373	-70.5464
NW_018084901.1	968940	969013	74	19	0.446246	0.565136	-0.11889	-91.3461
NW_018084912.1	5852	5964	113	26	0.63074	0.572413	0.0583273	129.288
NW_018084912.1	6500	6577	78	14	0.542078	0.451367	0.0907111	114.556
NW_018084912.1	13794	13905	112	18	0.210095	0.0564324	0.153662	111.177
NW_018084968.1	236512	236737	226	16	0.108351	0.300776	-0.192426	-100.132
NW_018084968.1	333853	333946	94	10	0.226769	0.117192	0.109577	51.5362
NW_018084968.1	750751	750844	94	14	0.236736	0.112169	0.124567	105.604
NW_018084968.1	1455685	1455742	58	5	0.736857	0.447577	0.28928	24.8909
NW_018084968.1	2032144	2032194	51	7	0.342054	0.556762	-0.214708	-34.6977
NW_018084973.1	11242	11338	97	12	0.32853	0.523542	-0.195012	-58.5694
NW_018084979.1	176005	176057	53	6	0.0773941	0.14201	-0.064616	-35.4111
NW_018084979.1	450875	450932	58	9	0.478412	0.301922	0.17649	38.6636
NW_018084979.1	1651281	1651373	93	19	0.957781	0.915405	0.0423757	80.3935
NW_018084979.1	1846028	1846097	70	26	0.146768	0.0788564	0.0679117	148.517
NW_018084979.1	1846408	1846570	163	35	0.0472523	0.0854913	-0.038239	-160.792
NW_018084979.1	2074456	2074652	197	24	0.449939	0.349059	0.10088	146.293
NW_018084979.1	2192377	2192430	54	11	0.936143	0.959903	-0.0237603	-35.0423
NW_018084979.1	2401799	2401873	75	5	0.0701231	0.339986	-0.269863	-24.9836
NW_018084979.1	2527404	2527457	54	20	0.316766	0.4127	-0.0959344	-101.608
NW_018084979.1	2539738	2539811	74	6	0.342692	0.266837	0.075855	35.6479
NW_018084979.1	2555730	2555826	97	10	0.38726	0.264725	0.122535	62.4585
NW_018084979.1	2936984	2937152	169	38	0.493421	0.327223	0.166198	350.206
NW_018084979.1	3011405	3011474	70	7	0.703373	0.581025	0.122349	28.0681
NW_018084979.1	3028998	3029224	227	38	0.376656	0.273868	0.102788	248.365
NW_018084979.1	3238553	3238646	94	13	0.60227	0.690177	-0.0879076	-62.6661
NW_018084979.1	3248357	3248551	195	21	0.952913	0.862649	0.090264	99.1441
NW_018084979.1	3284049	3284208	160	52	0.117682	0.0844903	0.0331918	285.087
NW_018084979.1	3801521	3801577	57	8	0.341812	0.147451	0.194361	43.5487
NW_018084982.1	27180	27271	92	11	0.598055	0.792683	-0.194628	-50.432
NW_018085018.1	45950	46188	239	14	0.144087	0.0779621	0.0661248	64.8781
NW_018085100.1	1278610	1278693	84	19	0.64911	0.749433	-0.100323	-86.786
NW_018085100.1	2171321	2171388	68	7	0.678956	0.892561	-0.213605	-41.3971
NW_018085100.1	2435965	2436032	68	15	0.235316	0.13351	0.101806	68.4465
NW_018085100.1	2577107	2577181	75	9	0.441361	0.251339	0.190021	44.1407
NW_018085108.1	3692	3812	121	27	0.913987	0.830906	0.0830808	147.754
NW_018085131.1	7544	7614	71	17	0.252119	0.215511	0.0366076	108.958
NW_018085138.1	14135	14190	56	5	0.55249	0.752532	-0.200042	-25.3307
NW_018085152.1	7028	7098	71	18	0.529654	0.702604	-0.172951	-88.5147
NW_018085152.1	37961	38069	109	21	0.318719	0.439922	-0.121204	-98.7749
NW_018085200.1	302398	302472	75	9	0.148219	0.0549073	0.0933116	42.2426
NW_018085246.1	40508	40558	51	8	0.613875	0.531089	0.0827859	37.8481
NW_018085344.1	670274	670370	97	12	0.238846	0.110288	0.128557	64.0032
NW_018085349.1	68693	68888	196	32	0.256704	0.34968	-0.0929762	-177.119
NW_018085356.1	577522	577575	54	22	0.352893	0.301761	0.0511318	122.755
NW_018085356.1	625842	625911	70	18	0.76319	0.853503	-0.0903126	-110.256

## Sheet: Table S5
Table S5 DMRs mapped to promoters and gene bodies
Chromosome	Start	End	Region ID	Region	Gene name
NC_010443.5	198953	199021	NC_010443.5:198227:200910	CGI
NC_010443.5	198953	199021	100620481	exon	DLL1
NC_010443.5	198953	199021	100620481	utr5	DLL1
NC_010443.5	479324	479416	NC_010443.5:479047:479416	CGI
NC_010443.5	827481	827532	NC_010443.5:826036:828929	CGI
NC_010443.5	1301923	1301979	NC_010443.5:1301401:1302119	CGI
NC_010443.5	1301923	1301979	100737228	intron	SMOC2
NC_010443.5	1425619	1425716	NC_010443.5:1423781:1425781	CGI_shore
NC_010443.5	1425619	1425716	NC_010443.5:1423955:1425956	CGI_shore
NC_010443.5	1425619	1425716	NC_010443.5:1425134:1427135	CGI_shore
NC_010443.5	1548015	1548068	100514019	intron	KIF25
NC_010443.5	1548015	1548068	NC_010443.5:1547004:1549005	CGI_shore
NC_010443.5	1548015	1548068	NC_010443.5:1547409:1549409	CGI_shore
NC_010443.5	1548015	1548068	NC_010443.5:1547443:1548257	CGI
NC_010443.5	1906426	1906546	NC_010443.5:1906268:1908268	CGI_shore
NC_010443.5	2227964	2228086	Target=PRE1g:1-248;Class=SINE/tRNA	repeat
NC_010443.5	2227964	2228086	100515286	intron	RPS6KA2
NC_010443.5	2227964	2228086	NC_010443.5:2226618:2228619	CGI_shore
NC_010443.5	2230652	2230715	100515286	intron	RPS6KA2
NC_010443.5	2231255	2231565	NC_010443.5:2230722:2232722	CGI_shore
NC_010443.5	2231255	2231565	Target=L1MC5:7104-7209;Class=LINE/L1	repeat
NC_010443.5	2231255	2231565	100515286	intron	RPS6KA2
NC_010443.5	2416450	2416545	NC_010443.5:2414947:2416947	CGI_shore
NC_010443.5	2416450	2416545	NC_010443.5:2416354:2418354	CGI_shore
NC_010443.5	2416450	2416545	Target=Pre0_SS:1-258;Class=SINE/tRNA	repeat
NC_010443.5	2416450	2416545	100515286	intron	RPS6KA2
NC_010443.5	2521620	2521675	NC_010443.5:2519461:2522548	CGI
NC_010443.5	2521620	2521675	100515286	exon	RPS6KA2
NC_010443.5	2521620	2521675	100515286	utr3	RPS6KA2
NC_010443.5	2524919	2524987	NC_010443.5:2524456:2526456	CGI_shore
NC_010443.5	2524919	2524987	NC_010443.5:2524813:2525046	CGI
NC_010443.5	2554467	2554531	NC_010443.5:2553258:2555258	CGI_shore
NC_010443.5	2554467	2554531	NC_010443.5:2554265:2554677	CGI
NC_010443.5	2600988	2601362	100623263	utr5	PRR18
NC_010443.5	2600988	2601362	100623263	exon	PRR18
NC_010443.5	2600988	2601362	NC_010443.5:2600859:2602515	CGI
NC_010443.5	2600988	2601362	100623263	intron	PRR18
NC_010443.5	8778819	8778900	100627260	intron	TULP4
NC_010443.5	8891772	8891900	NC_010443.5:8891151:8892204	CGI
NC_010443.5	8891772	8891900	100627260	promoter	TULP4
NC_010443.5	9765836	9765887	NC_010443.5:9765486:9765948	CGI
NC_010443.5	9765836	9765887	110259919	intron
NC_010443.5	13340638	13340759	100514020	promoter	RGS17
NC_010443.5	13340638	13340759	NC_010443.5:13339513:13341513	CGI_shore
NC_010443.5	13340638	13340759	NC_010443.5:13340182:13340976	CGI
NC_010443.5	13340638	13340759	100514020	intron	RGS17
NC_010443.5	15586459	15586562	NC_010443.5:15585071:15587071	CGI_shore
NC_010443.5	15586459	15586562	100621167	intron	PLEKHG1
NC_010443.5	18068449	18068513	Target=Pre0_SS:1-260;Class=SINE/tRNA	repeat
NC_010443.5	18068449	18068513	100522528	intron	SAMD5
NC_010443.5	18289280	18289330	NC_010443.5:18289279:18290726	CGI
NC_010443.5	18289280	18289330	100522528	exon	SAMD5
NC_010443.5	18289280	18289330	100522528	intron	SAMD5
NC_010443.5	21304389	21304439	733596	intron	PLAGL1
NC_010443.5	21304389	21304439	NC_010443.5:21303764:21304604	CGI
NC_010443.5	21869574	21869743	Target=Pre0_SS:1-258;Class=SINE/tRNA	repeat
NC_010443.5	21869574	21869743	110256604	intron
NC_010443.5	22801761	22801834	100511292	promoter	ADGRG6
NC_010443.5	22801761	22801834	100511292	exon	ADGRG6
NC_010443.5	22801761	22801834	100511292	utr5	ADGRG6
NC_010443.5	22801761	22801834	NC_010443.5:22801435:22802399	CGI
NC_010443.5	22801999	22802132	100511292	promoter	ADGRG6
NC_010443.5	22801999	22802132	100511292	exon	ADGRG6
NC_010443.5	22801999	22802132	100511292	utr5	ADGRG6
NC_010443.5	22801999	22802132	NC_010443.5:22801435:22802399	CGI
NC_010443.5	24219003	24219077	Target=Pre0_SS:1-257;Class=SINE/tRNA	repeat
NC_010443.5	30934350	30934426	100155211	exon	SLC18B1
NC_010443.5	30934350	30934426	100155211	utr5	SLC18B1
NC_010443.5	30934350	30934426	NC_010443.5:30934091:30934441	CGI
NC_010443.5	30934350	30934426	100155211	intron	SLC18B1
NC_010443.5	33032152	33032255	NC_010443.5:33032019:33033299	CGI
NC_010443.5	33032152	33032255	100157644	exon	TMEM200A
NC_010443.5	33032152	33032255	100157644	utr5	TMEM200A
NC_010443.5	33319467	33319536	100524352	promoter	L3MBTL3
NC_010443.5	33319467	33319536	NC_010443.5:33318937:33320938	CGI_shore
NC_010443.5	33319467	33319536	100524352	exon	L3MBTL3
NC_010443.5	33319467	33319536	100524352	utr5	L3MBTL3
NC_010443.5	33319467	33319536	Target=(GCC)n:1-22;Class=Simple_repeat	repeat
NC_010443.5	33319467	33319536	100524352	TSS	L3MBTL3
NC_010443.5	33694231	33694325	100525547	intron	ARHGAP18
NC_010443.5	33694231	33694325	Target=Pre0_SS:1-258;Class=SINE/tRNA	repeat
NC_010443.5	37760928	37761088	NC_010443.5:37760791:37761845	CGI
NC_010443.5	37760928	37761088	100515246	intron	TPD52L1
NC_010443.5	46187319	46187393	Target=Pre0_SS:1-257;Class=SINE/tRNA	repeat
NC_010443.5	46187319	46187393	102158510	intron	EYS
NC_010443.5	52435560	52435660	NC_010443.5:52434392:52436617	CGI
NC_010443.5	52435560	52435660	100154391	exon	KCNQ5
NC_010443.5	52435560	52435660	100154391	utr5	KCNQ5
NC_010443.5	52966492	52966639	NC_010443.5:52965806:52966674	CGI
NC_010443.5	52966492	52966639	100511846	exon	LOC100511846
NC_010443.5	52966492	52966639	100511846	utr5	LOC100511846
NC_010443.5	53527960	53528034	Target=Pre0_SS:1-249;Class=SINE/tRNA	repeat
NC_010443.5	55614727	55614808	100517252	promoter	ZNF292
NC_010443.5	55614727	55614808	NC_010443.5:55614659:55615222	CGI
NC_010443.5	60943029	60943231	100154222	intron	EPHA7
NC_010443.5	60943029	60943231	NC_010443.5:60941859:60943860	CGI_shore
NC_010443.5	60943029	60943231	NC_010443.5:60942998:60944419	CGI
NC_010443.5	68060285	68060403	NC_010443.5:68058777:68060777	CGI_shore
NC_010443.5	68060285	68060403	100516526	promoter	GRIK2
NC_010443.5	68060285	68060403	100516526	intron	GRIK2
NC_010443.5	68378171	68378235	Target=Pre0_SS:1-249;Class=SINE/tRNA	repeat
NC_010443.5	68378171	68378235	100516526	intron	GRIK2
NC_010443.5	72998378	72998452	Target=Pre0_SS:1-260;Class=SINE/tRNA	repeat
NC_010443.5	75522826	75522911	NC_010443.5:75522280:75523303	CGI
NC_010443.5	75522826	75522911	100153346	promoter	MICAL1
NC_010443.5	75523111	75523173	NC_010443.5:75522280:75523303	CGI
NC_010443.5	75523111	75523173	100153346	promoter	MICAL1
NC_010443.5	76367471	76367534	100736631	exon	METTL24
NC_010443.5	76367471	76367534	NC_010443.5:76367408:76367899	CGI
NC_010443.5	84544422	84544669	100156873	promoter	FAM46A
NC_010443.5	84544422	84544669	NC_010443.5:84543819:84546355	CGI
NC_010443.5	92418079	92418145	NC_010443.5:92416214:92418214	CGI_shore
NC_010443.5	97612943	97613004	100520594	exon	ZBTB7C
NC_010443.5	97612943	97613004	NC_010443.5:97612604:97613192	CGI
NC_010443.5	98015904	98015990	NC_010443.5:98014040:98016630	CGI
NC_010443.5	98015904	98015990	100520594	promoter	ZBTB7C
NC_010443.5	98433211	98433411	Target=(GGCG)n:1-31;Class=Simple_repeat	repeat
NC_010443.5	98433211	98433411	100152137	intron	CTIF
NC_010443.5	99808987	99809038	NC_010443.5:99808797:99810307	CGI
NC_010443.5	99808987	99809038	100521829	intron	MYO5B
NC_010443.5	107219461	107219590	100737608	exon	PIF1
NC_010443.5	107219461	107219590	110260912	intron
NC_010443.5	107219461	107219590	NC_010443.5:107219337:107220008	CGI
NC_010443.5	107897482	107897567	NC_010443.5:107896679:107897733	CGI
NC_010443.5	107897482	107897567	100624664	exon	SNX22
NC_010443.5	107897482	107897567	100624664	utr5	SNX22
NC_010443.5	107897482	107897567	100624664	promoter	SNX22
NC_010443.5	107897482	107897567	100624664	TSS	SNX22
NC_010443.5	109678983	109679196	NC_010443.5:109678624:109680656	CGI
NC_010443.5	109678983	109679196	100156660	exon	TLN2
NC_010443.5	109678983	109679196	100156660	utr5	TLN2
NC_010443.5	109678983	109679196	100156660	promoter	TLN2
NC_010443.5	109678983	109679196	100156660	intron	TLN2
NC_010443.5	109921874	109922080	NC_010443.5:109921476:109922526	CGI
NC_010443.5	109921874	109922080	100152206	exon	LOC100152206
NC_010443.5	109922434	109922485	NC_010443.5:109921476:109922526	CGI
NC_010443.5	109922434	109922485	100152206	exon	LOC100152206
NC_010443.5	118914803	118914889	100152052	exon	ONECUT1
NC_010443.5	118914803	118914889	NC_010443.5:118913415:118915415	CGI_shore
NC_010443.5	118914803	118914889	NC_010443.5:118914612:118916613	CGI_shore
NC_010443.5	120807371	120807449	100522001	promoter	TNFAIP8L3
NC_010443.5	120807371	120807449	NC_010443.5:120807195:120808316	CGI
NC_010443.5	120807371	120807449	106508998	exon	LOC106508998
NC_010443.5	121578920	121579198	NC_010443.5:121578365:121579325	CGI
NC_010443.5	121578920	121579198	494011	exon	SLC27A2
NC_010443.5	121578920	121579198	494011	utr5	SLC27A2
NC_010443.5	121578920	121579198	494011	TSS	SLC27A2
NC_010443.5	121578920	121579198	494011	promoter	SLC27A2
NC_010443.5	121578920	121579198	Target=(GCGGAG)n:1-36;Class=Simple_repeat	repeat
NC_010443.5	124952842	124952916	Target=Pre0_SS:1-260;Class=SINE/tRNA	repeat
NC_010443.5	129673677	129673743	Target=Pre0_SS:1-257;Class=SINE/tRNA	repeat
NC_010443.5	129673677	129673743	100156980	intron	MGA
NC_010443.5	130387924	130388154	NC_010443.5:130384819:130388088	CGI
NC_010443.5	130387924	130388154	100152163	promoter	DLL4
NC_010443.5	130387924	130388154	NC_010443.5:130387263:130389263	CGI_shore
NC_010443.5	130387924	130388154	NC_010443.5:130388088:130390089	CGI_shore
NC_010443.5	131365926	131366064	100153995	utr5	GPR176
NC_010443.5	131365926	131366064	100153995	exon	GPR176
NC_010443.5	131365926	131366064	NC_010443.5:131364891:131366213	CGI
NC_010443.5	131365926	131366064	Target=(GCGCCGG)n:1-43;Class=Simple_repeat	repeat
NC_010443.5	139494159	139494333	NC_010443.5:139494065:139495049	CGI
NC_010443.5	139494159	139494333	100521353	exon	LRRK1
NC_010443.5	139494159	139494333	100521353	utr5	LRRK1
NC_010443.5	139494159	139494333	100521353	promoter	LRRK1
NC_010443.5	139494602	139494759	NC_010443.5:139494065:139495049	CGI
NC_010443.5	139494602	139494759	100521353	intron	LRRK1
NC_010443.5	139494602	139494759	Target=(GTGAGT)n:1-77;Class=Simple_repeat	repeat
NC_010443.5	144473313	144473412	100620354	exon	NSMCE3
NC_010443.5	144473313	144473412	NC_010443.5:144473288:144474112	CGI
NC_010443.5	144473313	144473412	110261534	intron	FAM189A1
NC_010443.5	163435705	163435913	NC_010443.5:163435340:163436160	CGI
NC_010443.5	163435705	163435913	100513900	exon	IGDCC4
NC_010443.5	163435705	163435913	100513900	utr5	IGDCC4
NC_010443.5	163435705	163435913	Target=(GCC)n:1-64;Class=Simple_repeat	repeat
NC_010443.5	163435705	163435913	100513900	promoter	IGDCC4
NC_010443.5	163435705	163435913	100513900	TSS	IGDCC4
NC_010443.5	163435705	163435913	100513900	intron	IGDCC4
NC_010443.5	168766325	168766383	100524417	intron	THSD4
NC_010443.5	181773237	181773304	NC_010443.5:181771451:181773451	CGI_shore
NC_010443.5	181773237	181773304	NC_010443.5:181771496:181773290	CGI
NC_010443.5	181773237	181773304	100156994	promoter	NID2
NC_010443.5	181773237	181773304	NC_010443.5:181773290:181775291	CGI_shore
NC_010443.5	181773237	181773304	Target=(GGAGTGG)n:1-46;Class=Simple_repeat	repeat
NC_010443.5	186430406	186430465	100153219	utr5	AP5M1
NC_010443.5	186430406	186430465	100153219	exon	AP5M1
NC_010443.5	186430406	186430465	100513903	promoter	EXOC5
NC_010443.5	186430406	186430465	NC_010443.5:186430242:186432243	CGI_shore
NC_010443.5	187713666	187713730	Target=Pre0_SS:1-260;Class=SINE/tRNA	repeat
NC_010443.5	198992913	198992998	NC_010443.5:198992230:198993785	CGI
NC_010443.5	198992913	198992998	100153303	exon	ELAVL2
NC_010443.5	198992913	198992998	100153303	utr5	ELAVL2
NC_010443.5	198992913	198992998	100153303	intron	ELAVL2
NC_010443.5	207836239	207836301	100738488	promoter	ZDHHC21
NC_010443.5	207836239	207836301	NC_010443.5:207836226:207836503	CGI
NC_010443.5	216763767	216763900	396891	promoter	RLN2
NC_010443.5	216763767	216763900	396891	intron	RLN2
NC_010443.5	216763767	216763900	396891	exon	RLN2
NC_010443.5	216763767	216763900	396891	utr5	RLN2
NC_010443.5	216763767	216763900	574058	intron	CD274
NC_010443.5	217288038	217288204	NC_010443.5:217287626:217288039	CGI
NC_010443.5	217288038	217288204	100522234	promoter	CDC37L1
NC_010443.5	217288038	217288204	NC_010443.5:217288039:217290040	CGI_shore
NC_010443.5	217288038	217288204	100522592	intron	SPATA6L
NC_010443.5	221491854	221492015	NC_010443.5:221491331:221492205	CGI
NC_010443.5	221491854	221492015	100153522	exon	DOCK8
NC_010443.5	221491854	221492015	100153522	utr5	DOCK8
NC_010443.5	221491854	221492015	110259607	exon	C1H9orf66
NC_010443.5	221491854	221492015	100153522	TSS	DOCK8
NC_010443.5	221491854	221492015	100153522	promoter	DOCK8
NC_010443.5	221578479	221578587	100155087	exon	LOC100155087
NC_010443.5	221578479	221578587	NC_010443.5:221578260:221579399	CGI
NC_010443.5	222038626	222038865	102167387	promoter	PIP5K1B
NC_010443.5	222038626	222038865	NC_010443.5:222038464:222039632	CGI
NC_010443.5	222038626	222038865	102167387	TSS	PIP5K1B
NC_010443.5	222038626	222038865	102167387	exon	PIP5K1B
NC_010443.5	222038626	222038865	102167387	utr5	PIP5K1B
NC_010443.5	222658414	222658556	100154289	promoter	FAM189A2
NC_010443.5	222658414	222658556	Target=(CGG)n:1-82;Class=Simple_repeat	repeat
NC_010443.5	222658414	222658556	100154289	TSS	FAM189A2
NC_010443.5	222658414	222658556	NC_010443.5:222657832:222659032	CGI
NC_010443.5	222658414	222658556	100154289	utr5	FAM189A2
NC_010443.5	222658414	222658556	100154289	exon	FAM189A2
NC_010443.5	222658852	222658980	NC_010443.5:222657832:222659032	CGI
NC_010443.5	222658852	222658980	100154289	exon	FAM189A2
NC_010443.5	238511254	238511389	100153190	exon	FRMPD1
NC_010443.5	240595738	240595852	NC_010443.5:240595334:240595879	CGI
NC_010443.5	240595738	240595852	100512452	exon	GALNT12
NC_010443.5	240595738	240595852	100512452	intron	GALNT12
NC_010443.5	242215553	242215752	NC_010443.5:242214808:242215904	CGI
NC_010443.5	242215553	242215752	102166244	promoter	TMEFF1
NC_010443.5	242215553	242215752	102166244	exon	TMEFF1
NC_010443.5	242215553	242215752	Target=(CCCT)n:1-38;Class=Simple_repeat	repeat
NC_010443.5	242215553	242215752	102166244	intron	TMEFF1
NC_010443.5	246347928	246348165	NC_010443.5:246347914:246348232	CGI
NC_010443.5	248610142	248610208	NC_010443.5:248607333:248610234	CGI
NC_010443.5	248610142	248610208	595111	promoter	KLF4
NC_010443.5	250291734	250291852	100510946	exon	EPB41L4B
NC_010443.5	250291734	250291852	100510946	intron	EPB41L4B
NC_010443.5	250368549	250368668	NC_010443.5:250367714:250369605	CGI
NC_010443.5	250368549	250368668	100510946	exon	EPB41L4B
NC_010443.5	250368921	250368981	NC_010443.5:250367714:250369605	CGI
NC_010443.5	250368921	250368981	100510946	promoter	EPB41L4B
NC_010443.5	254770561	254770660	NC_010443.5:254768745:254770746	CGI_shore
NC_010443.5	254770561	254770660	NC_010443.5:254769723:254770675	CGI
NC_010443.5	254770561	254770660	102159686	intron	COL27A1
NC_010443.5	254856062	254856187	102159686	intron	COL27A1
NC_010443.5	263904658	263904743	100155286	intron	RABGAP1
NC_010443.5	263904658	263904743	Target=Pre0_SS:1-260;Class=SINE/tRNA	repeat
NC_010443.5	265117369	265117450	100514624	intron	NEK6
NC_010443.5	265117369	265117450	100514624	promoter	NEK6
NC_010443.5	267773063	267773206	NC_010443.5:267771487:267773399	CGI
NC_010443.5	267773063	267773206	100156351	intron	GARNL3
NC_010443.5	267798166	267798240	100156351	intron	GARNL3
NC_010443.5	268382976	268383077	NC_010443.5:268382426:268384426	CGI_shore
NC_010443.5	268382976	268383077	100523532	intron	ST6GALNAC6
NC_010443.5	268439114	268439270	Target=Pre0_SS:2-257;Class=SINE/tRNA	repeat
NC_010443.5	268589494	268589659	NC_010443.5:268588475:268590475	CGI_shore
NC_010443.5	268589494	268589659	100155133	intron	PTGES2
NC_010443.5	268589494	268589659	NC_010443.5:268589486:268589695	CGI
NC_010443.5	269069347	269069424	NC_010443.5:269069016:269070022	CGI
NC_010443.5	269069347	269069424	100519640	utr5	PKN3
NC_010443.5	269069347	269069424	100519640	exon	PKN3
NC_010443.5	269069347	269069424	NC_010443.5:269069366:269071366	CGI_shore
NC_010443.5	269069347	269069424	100519640	intron	PKN3
NC_010443.5	269307595	269307751	NC_010443.5:269306999:269309000	CGI_shore
NC_010443.5	269307595	269307751	100153500	intron	NUP188
NC_010443.5	269834478	269834553	NC_010443.5:269833858:269834553	CGI
NC_010443.5	269834478	269834553	100101474	promoter	ASB6
NC_010443.5	270021704	270021757	100157102	intron	USP20
NC_010443.5	270021704	270021757	100157102	exon	USP20
NC_010443.5	270739122	270739194	NC_010443.5:270738916:270739959	CGI
NC_010443.5	270739122	270739194	100522920	exon	PRDM12
NC_010443.5	270739255	270739518	NC_010443.5:270738916:270739959	CGI
NC_010443.5	270739255	270739518	100522920	exon	PRDM12
NC_010443.5	270739255	270739518	100522920	TES	PRDM12
NC_010443.5	270912363	270912428	NC_010443.5:270912301:270914301	CGI_shore
NC_010443.5	270912363	270912428	100524361	utr5	QRFP
NC_010443.5	270912363	270912428	100524361	exon	QRFP
NC_010443.5	270946369	270946467	100523302	exon	FIBCD1
NC_010443.5	270946369	270946467	NC_010443.5:270946357:270946605	CGI
NC_010443.5	271473955	271474135	NC_010443.5:271471997:271473997	CGI_shore
NC_010443.5	271473955	271474135	100510887	exon	LOC100510887
NC_010443.5	271473955	271474135	NC_010443.5:271473858:271475858	CGI_shore
NC_010443.5	271473955	271474135	Target=(CCCAGG)n:1-34;Class=Simple_repeat	repeat
NC_010443.5	271473955	271474135	NC_010443.5:271473998:271474208	CGI
NC_010443.5	272015934	272015992	Target=SINE1C_SS:1-134;Class=SINE/tRNA	repeat
NC_010443.5	272015934	272015992	100512264	intron	NTNG2
NC_010443.5	273122634	273122754	NC_010443.5:273122165:273124165	CGI_shore
NC_010443.5	273122634	273122754	NC_010443.5:273122440:273122701	CGI
NC_010443.5	273122634	273122754	100628047	intron	ADAMTSL2
NC_010443.5	273122634	273122754	NC_010443.5:273122701:273124702	CGI_shore
NC_010443.5	273124445	273124641	NC_010443.5:273122701:273124702	CGI_shore
NC_010443.5	273124445	273124641	100628047	intron	ADAMTSL2
NC_010443.5	273124445	273124641	NC_010443.5:273124166:273125572	CGI
NC_010443.5	273124445	273124641	100628047	exon	ADAMTSL2
NC_010443.5	273393043	273393114	NC_010443.5:273391982:273393983	CGI_shore
NC_010443.5	273393043	273393114	NC_010443.5:273393081:273395081	CGI_shore
NC_010443.5	273393043	273393114	100151931	intron	VAV2
NC_010443.5	273393444	273393575	NC_010443.5:273391982:273393983	CGI_shore
NC_010443.5	273393444	273393575	NC_010443.5:273393081:273395081	CGI_shore
NC_010443.5	273393444	273393575	100151931	intron	VAV2
NC_010443.5	273398272	273398358	NC_010443.5:273396766:273398766	CGI_shore
NC_010443.5	273398272	273398358	NC_010443.5:273397855:273398323	CGI
NC_010443.5	273398272	273398358	Target=L1ME3A:6066-6117;Class=LINE/L1	repeat
NC_010443.5	273398272	273398358	NC_010443.5:273398323:273400324	CGI_shore
NC_010443.5	273398272	273398358	100151931	intron	VAV2
NC_010443.5	273828630	273828687	NC_010443.5:273827145:273829145	CGI_shore
NC_010443.5	273828630	273828687	110256568	promoter
NC_010443.5	273828630	273828687	NC_010443.5:273827945:273829946	CGI_shore
NC_010443.5	273975683	273975758	NC_010443.5:273973817:273975818	CGI_shore
NC_010443.5	273975683	273975758	NC_010443.5:273974539:273976539	CGI_shore
NC_010443.5	273975683	273975758	NC_010443.5:273975044:273977045	CGI_shore
NC_010443.5	273975683	273975758	NC_010443.5:273975066:273977066	CGI_shore
NC_010443.5	273975683	273975758	397533	intron	COL5A1
NC_010443.5	274129867	274129977	NC_010443.5:274128235:274130236	CGI_shore
NC_010443.5	274129867	274129977	NC_010443.5:274129230:274131231	CGI_shore
NC_010443.5	274129867	274129977	397316	intron	FCN1
NC_010443.5	274226044	274226210	NC_010443.5:274224836:274226837	CGI_shore
NC_010444.4	323652	323749	100514944	exon	LRRC56
NC_010444.4	323652	323749	100514944	utr3	LRRC56
NC_010444.4	323652	323749	NC_010444.4:323436:325157	CGI
NC_010444.4	323652	323749	100514751	utr3	LMNTD2
NC_010444.4	323652	323749	100514751	exon	LMNTD2
NC_010444.4	323652	323749	100514944	TES	LRRC56
NC_010444.4	669125	669320	NC_010444.4:668132:670132	CGI_shore
NC_010444.4	897173	897481	NC_010444.4:895669:897883	CGI
NC_010444.4	897173	897481	NC_010444.4:897443:899443	CGI_shore
NC_010444.4	897173	897481	110259211	intron	BRSK2
NC_010444.4	904803	904994	NC_010444.4:904383:906383	CGI_shore
NC_010444.4	904803	904994	110259211	intron	BRSK2
NC_010444.4	934867	934918	110259211	intron	BRSK2
NC_010444.4	934867	934918	NC_010444.4:933263:935263	CGI_shore
NC_010444.4	1180301	1180385	110259214	intron	IFITM10
NC_010444.4	1273489	1273566	NC_010444.4:1272761:1273588	CGI
NC_010444.4	1273489	1273566	110259215	intron	LSP1
NC_010444.4	1275118	1275205	NC_010444.4:1273588:1275589	CGI_shore
NC_010444.4	1275118	1275205	110259215	promoter	LSP1
NC_010444.4	1275118	1275205	110259215	intron	LSP1
NC_010444.4	1287624	1287754	NC_010444.4:1285646:1287647	CGI_shore
NC_010444.4	1287624	1287754	110259215	intron	LSP1
NC_010444.4	1287624	1287754	Target=(CTGCCCT)n:1-61;Class=Simple_repeat	repeat
NC_010444.4	1293723	1293820	110259216	exon	LOC110259216
NC_010444.4	1293723	1293820	110259216	utr5	LOC110259216
NC_010444.4	1293723	1293820	110259215	intron	LSP1
NC_010444.4	1363341	1363403	110259183	intron	LOC110259183
NC_010444.4	1366811	1366874	110259183	intron	LOC110259183
NC_010444.4	1478462	1478562	396916	intron	IGF2
NC_010444.4	1478462	1478562	396916	promoter	IGF2
NC_010444.4	1478462	1478562	NC_010444.4:1477841:1480751	CGI
NC_010444.4	1478462	1478562	396916	exon	IGF2
NC_010444.4	1478462	1478562	396916	utr5	IGF2
NC_010444.4	1892334	1892407	NC_010444.4:1891400:1893401	CGI_shore
NC_010444.4	1892334	1892407	397326	intron	KCNQ1
NC_010444.4	1987030	1987096	NC_010444.4:1986528:1988529	CGI_shore
NC_010444.4	1987030	1987096	NC_010444.4:1986922:1988922	CGI_shore
NC_010444.4	1987030	1987096	110259224	intron
NC_010444.4	1987030	1987096	397326	intron	KCNQ1
NC_010444.4	1992872	1992947	110259222	intron	LOC110259222
NC_010444.4	2254225	2254328	100515995	intron	OSBPL5
NC_010444.4	2503893	2503951	NC_010444.4:2502537:2504649	CGI
NC_010444.4	2533867	2533970	NC_010444.4:2533350:2533988	CGI
NC_010444.4	2533867	2533970	102160500	intron	SHANK2
NC_010444.4	2706945	2707056	NC_010444.4:2706069:2708069	CGI_shore
NC_010444.4	2706945	2707056	NC_010444.4:2707040:2709040	CGI_shore
NC_010444.4	2706945	2707056	102160500	intron	SHANK2
NC_010444.4	2720882	2721056	NC_010444.4:2720305:2722305	CGI_shore
NC_010444.4	2720882	2721056	NC_010444.4:2720584:2720971	CGI
NC_010444.4	2720882	2721056	NC_010444.4:2720971:2722972	CGI_shore
NC_010444.4	2720882	2721056	102160500	intron	SHANK2
NC_010444.4	2839149	2839248	NC_010444.4:2837736:2839737	CGI_shore
NC_010444.4	2839149	2839248	NC_010444.4:2838173:2840173	CGI_shore
NC_010444.4	2839149	2839248	Target=L1-3_SSc:7154-7218;Class=LINE/L1	repeat
NC_010444.4	2839149	2839248	Target=Pre0_SS:1-255;Class=SINE/tRNA	repeat
NC_010444.4	2839149	2839248	102160500	intron	SHANK2
NC_010444.4	2908317	2908400	NC_010444.4:2906713:2908713	CGI_shore
NC_010444.4	2908317	2908400	Target=Pre0_SS:1-256;Class=SINE/tRNA	repeat
NC_010444.4	2908317	2908400	102160500	intron	SHANK2
NC_010444.4	2991430	2991496	NC_010444.4:2991270:2993271	CGI_shore
NC_010444.4	2991430	2991496	102160500	exon	SHANK2
NC_010444.4	2991430	2991496	102160500	intron	SHANK2
NC_010444.4	2998181	2998237	102160500	intron	SHANK2
NC_010444.4	2998181	2998237	NC_010444.4:2997295:2999295	CGI_shore
NC_010444.4	3129798	3129924	NC_010444.4:3129121:3131122	CGI_shore
NC_010444.4	3129798	3129924	100738060	intron	PPFIA1
NC_010444.4	3364826	3364943	100738137	intron	ANO1
NC_010444.4	3490004	3490126	NC_010444.4:3488327:3490870	CGI
NC_010444.4	3490004	3490126	100519127	intron	FGF3
NC_010444.4	4886462	4886525	100739347	intron	ALDH3B1
NC_010444.4	4886462	4886525	NC_010444.4:4884902:4886902	CGI_shore
NC_010444.4	4886462	4886525	Target=MIRb:41-187;Class=SINE/MIR	repeat
NC_010444.4	4898497	4898566	100522238	utr5	UNC93B1
NC_010444.4	4898497	4898566	100522238	exon	UNC93B1
NC_010444.4	4898497	4898566	NC_010444.4:4898337:4899583	CGI
NC_010444.4	4898696	4898901	100522238	intron	UNC93B1
NC_010444.4	4898696	4898901	NC_010444.4:4898337:4899583	CGI
NC_010444.4	4898696	4898901	100522238	exon	UNC93B1
NC_010444.4	5075302	5075377	NC_010444.4:5073860:5075860	CGI_shore
NC_010444.4	5075302	5075377	100624617	exon	GPR152
NC_010444.4	5075302	5075377	100512702	intron	CABP4
NC_010444.4	5101070	5101127	NC_010444.4:5100709:5102710	CGI_shore
NC_010444.4	5101070	5101127	100512885	intron	CARNS1
NC_010444.4	5182395	5182477	110259234	promoter	LOC110259234
NC_010444.4	5182395	5182477	NC_010444.4:5182055:5184056	CGI_shore
NC_010444.4	5182395	5182477	Target=Pre0_SS:3-260;Class=SINE/tRNA	repeat
NC_010444.4	5206300	5206357	NC_010444.4:5204742:5206742	CGI_shore
NC_010444.4	5206300	5206357	NC_010444.4:5205028:5207029	CGI_shore
NC_010444.4	5206300	5206357	100515297	intron	ANKRD13D
NC_010444.4	5358296	5358469	100294703	promoter	KDM2A
NC_010444.4	5358296	5358469	NC_010444.4:5356976:5359133	CGI
NC_010444.4	6092929	6093125	100520884	exon	TMEM151A
NC_010444.4	6092929	6093125	NC_010444.4:6091603:6093068	CGI
NC_010444.4	6092929	6093125	Target=MIR3:2-152;Class=SINE/MIR	repeat
NC_010444.4	6092929	6093125	NC_010444.4:6092866:6094866	CGI_shore
NC_010444.4	6092929	6093125	100520884	intron	TMEM151A
NC_010444.4	6092929	6093125	NC_010444.4:6093068:6095069	CGI_shore
NC_010444.4	6117099	6117217	100144502	promoter	RAB1B
NC_010444.4	6117099	6117217	NC_010444.4:6116809:6118810	CGI_shore
NC_010444.4	6117099	6117217	NC_010444.4:6116819:6118819	CGI_shore
NC_010444.4	6117099	6117217	NC_010444.4:6117029:6117249	CGI
NC_010444.4	6538445	6538845	NC_010444.4:6537993:6539697	CGI
NC_010444.4	6538445	6538845	100511364	exon	OVOL1
NC_010444.4	6538445	6538845	100511364	utr5	OVOL1
NC_010444.4	6538445	6538845	Target=(GGC)n:1-39;Class=Simple_repeat	repeat
NC_010444.4	6538445	6538845	100511736	TSS	AP5B1
NC_010444.4	6538445	6538845	100511736	exon	AP5B1
NC_010444.4	6538445	6538845	100511736	utr5	AP5B1
NC_010444.4	6538445	6538845	100511364	intron	OVOL1
NC_010444.4	6538445	6538845	100511736	promoter	AP5B1
NC_010444.4	6538445	6538845	100511364	promoter	OVOL1
NC_010444.4	6604687	6604880	NC_010444.4:6604324:6604958	CGI
NC_010444.4	6662765	6662881	100518056	utr3	EHBP1L1
NC_010444.4	6662765	6662881	100518056	exon	EHBP1L1
NC_010444.4	6662765	6662881	NC_010444.4:6662654:6663418	CGI
NC_010444.4	7559246	7559323	100520540	exon	SLC22A12
NC_010444.4	8144524	8144751	100526032	promoter	RCOR2
NC_010444.4	8904659	8904816	Target=Pre0_SS:1-259;Class=SINE/tRNA	repeat
NC_010444.4	8904659	8904816	100144589	intron	SLC3A2
NC_010444.4	9352453	9352554	100517023	exon	ASRGL1
NC_010444.4	9352453	9352554	NC_010444.4:9352422:9353463	CGI
NC_010444.4	14933158	14933430	100514151	promoter	AGBL2
NC_010444.4	14933158	14933430	NC_010444.4:14933034:14933407	CGI
NC_010444.4	14933158	14933430	100514151	TSS	AGBL2
NC_010444.4	14933158	14933430	100514151	exon	AGBL2
NC_010444.4	14933158	14933430	100514151	utr5	AGBL2
NC_010444.4	14933158	14933430	NC_010444.4:14933407:14935408	CGI_shore
NC_010444.4	15616333	15616443	NC_010444.4:15616095:15616636	CGI
NC_010444.4	15616333	15616443	100518293	exon	LRP4
NC_010444.4	15616333	15616443	100518293	intron	LRP4
NC_010444.4	16550130	16550230	NC_010444.4:16548228:16550228	CGI_shore
NC_010444.4	16550130	16550230	100517024	intron	LARGE2
NC_010444.4	16550130	16550230	Target=MIRc:35-156;Class=SINE/MIR	repeat
NC_010444.4	16550130	16550230	NC_010444.4:16550229:16551006	CGI
NC_010444.4	17744688	17744739	Target=Pre0_SS:1-258;Class=SINE/tRNA	repeat
NC_010444.4	18392610	18392773	110259563	utr3	C2H11orf96
NC_010444.4	18392610	18392773	110259563	exon	C2H11orf96
NC_010444.4	18392610	18392773	NC_010444.4:18392362:18393963	CGI
NC_010444.4	18392610	18392773	100521486	intron	ACCSL
NC_010444.4	24811450	24811594	100523837	intron	PRR5L
NC_010444.4	25035957	25036121	100511916	intron	LDLRAD3
NC_010444.4	27240698	27240764	100513003	exon	KIAA1549L
NC_010444.4	28971334	28971412	NC_010444.4:28969384:28971384	CGI_shore
NC_010444.4	28971334	28971412	100514152	promoter	PAX6
NC_010444.4	28971334	28971412	NC_010444.4:28969702:28971703	CGI_shore
NC_010444.4	28971334	28971412	NC_010444.4:28970124:28972124	CGI_shore
NC_010444.4	28971334	28971412	NC_010444.4:28971385:28971785	CGI
NC_010444.4	28972630	28972826	100514152	promoter	PAX6
NC_010444.4	28972630	28972826	100514152	intron	PAX6
NC_010444.4	28972630	28972826	NC_010444.4:28971785:28973786	CGI_shore
NC_010444.4	28972630	28972826	NC_010444.4:28972520:28974521	CGI_shore
NC_010444.4	28973368	28973460	100514152	promoter	PAX6
NC_010444.4	28973368	28973460	100514152	intron	PAX6
NC_010444.4	28973368	28973460	NC_010444.4:28971785:28973786	CGI_shore
NC_010444.4	28973368	28973460	NC_010444.4:28972520:28974521	CGI_shore
NC_010444.4	28973368	28973460	NC_010444.4:28973270:28975270	CGI_shore
NC_010444.4	28975504	28975594	100514152	intron	PAX6
NC_010444.4	28975504	28975594	NC_010444.4:28975008:28977008	CGI_shore
NC_010444.4	28975504	28975594	NC_010444.4:28975271:28975606	CGI
NC_010444.4	28975504	28975594	100514152	promoter	PAX6
NC_010444.4	28975504	28975594	100514152	exon	PAX6
NC_010444.4	28975504	28975594	100514152	utr5	PAX6
NC_010444.4	29702603	29702690	NC_010444.4:29702509:29702997	CGI
NC_010444.4	29702603	29702690	100517025	intron	LOC100517025
NC_010444.4	33210752	33210825	Target=Pre0_SS:1-259;Class=SINE/tRNA	repeat
NC_010444.4	33210752	33210825	110259287	intron
NC_010444.4	33210752	33210825	102165168	intron
NC_010444.4	39051515	39051660	NC_010444.4:39049752:39051752	CGI_shore
NC_010444.4	39051515	39051660	100521603	exon	HTATIP2
NC_010444.4	39051515	39051660	100521603	utr5	HTATIP2
NC_010444.4	39051515	39051660	100521603	intron	HTATIP2
NC_010444.4	39689537	39689644	100521067	intron	NAV2
NC_010444.4	41666816	41667034	100158245	promoter	ABCC8
NC_010444.4	41666816	41667034	NC_010444.4:41666556:41667270	CGI
NC_010444.4	41666816	41667034	Target=(CAGCCG)n:1-31;Class=Simple_repeat	repeat
NC_010444.4	41666816	41667034	100158245	TSS	ABCC8
NC_010444.4	41666816	41667034	100158245	exon	ABCC8
NC_010444.4	42081626	42081735	100514820	promoter	PLEKHA7
NC_010444.4	42081626	42081735	NC_010444.4:42081357:42082577	CGI
NC_010444.4	42081626	42081735	100514820	utr5	PLEKHA7
NC_010444.4	42081626	42081735	100514820	exon	PLEKHA7
NC_010444.4	43949607	43949662	Target=Pre0_SS:1-260;Class=SINE/tRNA	repeat
NC_010444.4	43949607	43949662	100515187	intron	INSC
NC_010444.4	48263831	48263928	Target=Pre0_SS:2-260;Class=SINE/tRNA	repeat
NC_010444.4	49082994	49083172	NC_010444.4:49082751:49083432	CGI
NC_010444.4	49082994	49083172	100620914	exon	AMPD3
NC_010444.4	49082994	49083172	100620914	utr5	AMPD3
NC_010444.4	49082994	49083172	100620914	promoter	AMPD3
NC_010444.4	49082994	49083172	100620914	intron	AMPD3
NC_010444.4	51323173	51323327	NC_010444.4:51321956:51323957	CGI_shore
NC_010444.4	51323173	51323327	102157525	exon	OBSCN
NC_010444.4	51323173	51323327	NC_010444.4:51323089:51323333	CGI
NC_010444.4	51323173	51323327	102157525	intron	OBSCN
NC_010444.4	57335128	57335202	Target=Pre0_SS:1-258;Class=SINE/tRNA	repeat
NC_010444.4	58617379	58617435	NC_010444.4:58617169:58617585	CGI
NC_010444.4	58617379	58617435	110259311	exon	TM6SF2
NC_010444.4	58617379	58617435	110259311	utr5	TM6SF2
NC_010444.4	59221489	59221553	100511310	intron	TMEM59L
NC_010444.4	59221489	59221553	100738750	promoter	CRLF1
NC_010444.4	59221489	59221553	NC_010444.4:59221175:59223270	CGI
NC_010444.4	59363789	59364024	NC_010444.4:59363514:59368752	CGI
NC_010444.4	59363789	59364024	102164826	exon
NC_010444.4	59363789	59364024	102164826	intron
NC_010444.4	59364127	59364253	NC_010444.4:59363514:59368752	CGI
NC_010444.4	59364127	59364253	102164826	intron
NC_010444.4	59364127	59364253	102164826	exon
NC_010444.4	61272300	61272769	NC_010444.4:61271040:61273371	CGI
NC_010444.4	61272300	61272769	100174959	exon	KLF2
NC_010444.4	61272300	61272769	Target=(GGC)n:1-36;Class=Simple_repeat	repeat
NC_010444.4	61272300	61272769	100174959	intron	KLF2
NC_010444.4	65925409	65925522	NC_010444.4:65923839:65925839	CGI_shore
NC_010444.4	65925409	65925522	100524850	exon	NACC1
NC_010444.4	65925409	65925522	NC_010444.4:65925407:65925656	CGI
NC_010444.4	68789544	68789685	NC_010444.4:68789156:68790912	CGI
NC_010444.4	68789544	68789685	100512648	exon	OLFM2
NC_010444.4	68789544	68789685	100512648	utr5	OLFM2
NC_010444.4	68789544	68789685	100512648	intron	OLFM2
NC_010444.4	68807026	68807129	NC_010444.4:68806939:68807287	CGI
NC_010444.4	68807026	68807129	100512648	exon	OLFM2
NC_010444.4	68807026	68807129	Target=(AGC)n:1-51;Class=Simple_repeat	repeat
NC_010444.4	68807026	68807129	100512648	utr5	OLFM2
NC_010444.4	69117898	69117976	NC_010444.4:69116337:69118338	CGI_shore
NC_010444.4	69117898	69117976	NC_010444.4:69116752:69118049	CGI
NC_010444.4	69117898	69117976	100511183	exon	LOC100511183
NC_010444.4	69235747	69235910	NC_010444.4:69234739:69236739	CGI_shore
NC_010444.4	69235747	69235910	396825	promoter	PDE4A
NC_010444.4	69235747	69235910	NC_010444.4:69235332:69235902	CGI
NC_010444.4	69235747	69235910	396825	exon	PDE4A
NC_010444.4	69235747	69235910	396825	utr5	PDE4A
NC_010444.4	69235747	69235910	Target=MIRc:53-230;Class=SINE/MIR	repeat
NC_010444.4	69235747	69235910	NC_010444.4:69235902:69237903	CGI_shore
NC_010444.4	69235747	69235910	396825	intron	PDE4A
NC_010444.4	69353678	69353802	NC_010444.4:69353669:69353976	CGI
NC_010444.4	69353678	69353802	102168166	exon	AP1M2
NC_010444.4	69353678	69353802	102168166	utr5	AP1M2
NC_010444.4	69353678	69353802	102168166	intron	AP1M2
NC_010444.4	70047672	70047741	100515600	exon	CCDC159
NC_010444.4	70047672	70047741	100515600	utr3	CCDC159
NC_010444.4	70047672	70047741	NC_010444.4:70047559:70047792	CGI
NC_010444.4	70047672	70047741	100515428	exon	PLPPR2
NC_010444.4	70047672	70047741	100515428	utr5	PLPPR2
NC_010444.4	70912627	70912706	NC_010444.4:70911216:70913216	CGI_shore
NC_010444.4	70912627	70912706	NC_010444.4:70912411:70912995	CGI
NC_010444.4	70912627	70912706	397628	exon	ANGPTL4
NC_010444.4	71324197	71324255	102160785	exon	PRR36
NC_010444.4	71324197	71324255	NC_010444.4:71323951:71325332	CGI
NC_010444.4	71324197	71324255	NC_010444.4:71324020:71326020	CGI_shore
NC_010444.4	71502726	71502834	100525506	promoter	PCP2
NC_010444.4	71502726	71502834	NC_010444.4:71502618:71502835	CGI
NC_010444.4	71502726	71502834	100525506	intron	PCP2
NC_010444.4	72721645	72721780	Target=Pre0_SS:1-260;Class=SINE/tRNA	repeat
NC_010444.4	72721645	72721780	100622165	intron	ACER1
NC_010444.4	73574893	73574977	NC_010444.4:73574550:73576064	CGI
NC_010444.4	73917586	73917657	100511003	exon	UHRF1
NC_010444.4	73917586	73917657	100511003	intron	UHRF1
NC_010444.4	74601978	74602058	Target=MLT1B:184-382;Class=LTR/ERVL-MaLR	repeat
NC_010444.4	74961201	74961268	100626455	intron	TJP3
NC_010444.4	74961201	74961268	NC_010444.4:74961007:74961464	CGI
NC_010444.4	74961201	74961268	100626455	exon	TJP3
NC_010444.4	74961201	74961268	100626455	utr5	TJP3
NC_010444.4	74961201	74961268	100626455	promoter	TJP3
NC_010444.4	75069493	75069692	110259364	exon	TBXA2R
NC_010444.4	75069493	75069692	110259364	utr5	TBXA2R
NC_010444.4	75069493	75069692	110259364	intron	TBXA2R
NC_010444.4	75069493	75069692	NC_010444.4:75069116:75069594	CGI
NC_010444.4	75069493	75069692	NC_010444.4:75069594:75071595	CGI_shore
NC_010444.4	75256762	75256816	NC_010444.4:75255971:75257972	CGI_shore
NC_010444.4	75256762	75256816	100737330	promoter	NFIC
NC_010444.4	75256762	75256816	NC_010444.4:75256518:75256789	CGI
NC_010444.4	75256762	75256816	NC_010444.4:75256789:75258790	CGI_shore
NC_010444.4	75256762	75256816	100737330	intron	NFIC
NC_010444.4	75492847	75492898	110259367	intron	AES
NC_010444.4	75492847	75492898	NC_010444.4:75492627:75494628	CGI_shore
NC_010444.4	75492847	75492898	Target=G-rich:1-35;Class=Low_complexity	repeat
NC_010444.4	75493349	75493455	110259367	intron	AES
NC_010444.4	75493349	75493455	NC_010444.4:75492627:75494628	CGI_shore
NC_010444.4	77156797	77156905	NC_010444.4:77156680:77158681	CGI_shore
NC_010444.4	77515520	77515603	100521655	exon	MED16
NC_010444.4	77515520	77515603	100521655	utr3	MED16
NC_010444.4	77515520	77515603	NC_010444.4:77515094:77515603	CGI
NC_010444.4	77515520	77515603	100522182	exon	ELANE
NC_010444.4	77515520	77515603	100522182	intron	ELANE
NC_010444.4	77515520	77515603	100521655	intron	MED16
NC_010444.4	77730531	77730618	NC_010444.4:77729691:77731119	CGI
NC_010444.4	77730531	77730618	100625160	exon	HCN2
NC_010444.4	79766007	79766087	100521775	promoter	COL23A1
NC_010444.4	79766007	79766087	NC_010444.4:79765833:79766991	CGI
NC_010444.4	79766842	79766908	NC_010444.4:79765833:79766991	CGI
NC_010444.4	79766842	79766908	100521775	intron	COL23A1
NC_010444.4	80543629	80543694	NC_010444.4:80542518:80543735	CGI
NC_010444.4	80543629	80543694	397474	exon	F12
NC_010444.4	80543629	80543694	NC_010444.4:80542199:80544199	CGI_shore
NC_010444.4	80543629	80543694	106508714	promoter	PFN3
NC_010444.4	81318092	81318143	100525508	exon	GPRIN1
NC_010444.4	81318092	81318143	106509472	promoter
NC_010444.4	81318092	81318143	NC_010444.4:81317480:81318327	CGI
NC_010444.4	82386544	82386641	NC_010444.4:82386230:82386693	CGI
NC_010444.4	82386544	82386641	Target=(GGCG)n:1-26;Class=Simple_repeat	repeat
NC_010444.4	82386544	82386641	102165038	intron
NC_010444.4	86724123	86724188	NC_010444.4:86723680:86725681	CGI_shore
NC_010444.4	86724123	86724188	Target=(CCG)n:1-63;Class=Simple_repeat	repeat
NC_010444.4	89138221	89138325	100511985	intron	FAM151B
NC_010444.4	89138221	89138325	Target=Pre0_SS:1-260;Class=SINE/tRNA	repeat
NC_010444.4	96083861	96083921	NC_010444.4:96083409:96085409	CGI_shore
NC_010444.4	96083861	96083921	NC_010444.4:96083763:96084601	CGI
NC_010444.4	100379957	100380033	Target=Pre0_SS:1-260;Class=SINE/tRNA	repeat
NC_010444.4	105042338	105042528	100737299	promoter	RGMB
NC_010444.4	105042338	105042528	NC_010444.4:105042235:105042857	CGI
NC_010444.4	105042338	105042528	100737299	TSS	RGMB
NC_010444.4	105042338	105042528	100737299	exon	RGMB
NC_010444.4	105042338	105042528	100737299	utr5	RGMB
NC_010444.4	110539302	110539475	NC_010444.4:110539201:110539696	CGI
NC_010444.4	110539302	110539475	110259433	intron
NC_010444.4	116379925	116380032	Target=Pre0_SS:1-260;Class=SINE/tRNA	repeat
NC_010444.4	116379925	116380032	100515712	intron	MCC
NC_010444.4	119341762	119341874	100519890	promoter	TRIM36
NC_010444.4	119341762	119341874	100519890	intron	TRIM36
NC_010444.4	119341762	119341874	NC_010444.4:119340294:119342176	CGI
NC_010444.4	120688576	120688891	NC_010444.4:120687392:120689393	CGI_shore
NC_010444.4	120688576	120688891	100522008	promoter	SEMA6A
NC_010444.4	120688576	120688891	NC_010444.4:120688492:120688892	CGI
NC_010444.4	126223707	126223771	Target=Pre0_SS:1-260;Class=SINE/tRNA	repeat
NC_010444.4	130047423	130047484	Target=LTR78:290-1055;Class=LTR/ERV1	repeat
NC_010444.4	134555904	134556046	100520235	promoter	PDLIM4
NC_010444.4	134555904	134556046	NC_010444.4:134555469:134556183	CGI
NC_010444.4	134555904	134556046	100520235	intron	PDLIM4
NC_010444.4	134555904	134556046	Target=(GGCGGC)n:1-108;Class=Simple_repeat	repeat
NC_010444.4	134555904	134556046	100520235	utr5	PDLIM4
NC_010444.4	134555904	134556046	100520235	exon	PDLIM4
NC_010444.4	134555904	134556046	Target=(TCCGGC)n:1-32;Class=Simple_repeat	repeat
NC_010444.4	134555904	134556046	100623801	intron	P4HA2
NC_010444.4	135477324	135477410	Target=Pre0_SS:1-258;Class=SINE/tRNA	repeat
NC_010444.4	135477324	135477410	110259479	intron
NC_010444.4	136777982	136778220	100513723	utr5	JADE2
NC_010444.4	136777982	136778220	100513723	intron	JADE2
NC_010444.4	136777982	136778220	100513723	promoter	JADE2
NC_010444.4	136777982	136778220	100513723	exon	JADE2
NC_010444.4	136777982	136778220	NC_010444.4:136777693:136779694	CGI_shore
NC_010444.4	136777982	136778220	NC_010444.4:136777835:136781105	CGI
NC_010444.4	137207158	137207213	NC_010444.4:137205574:137207668	CGI
NC_010444.4	137207158	137207213	100689266	promoter	PITX1
NC_010444.4	137207158	137207213	100689266	intron	PITX1
NC_010444.4	137207158	137207213	Target=(CCCT)n:1-122;Class=Simple_repeat	repeat
NC_010444.4	139523316	139523388	NC_010444.4:139522238:139523465	CGI
NC_010444.4	139523316	139523388	100620623	utr5	SPOCK1
NC_010444.4	139523316	139523388	100620623	exon	SPOCK1
NC_010444.4	139523316	139523388	Target=(CTCG)n:1-32;Class=Simple_repeat	repeat
NC_010444.4	140651711	140651800	Target=LTR21_SS:2-564;Class=LTR/ERV1	repeat
NC_010444.4	141276092	141276175	NC_010444.4:141274301:141276301	CGI_shore
NC_010444.4	141276092	141276175	110259503	promoter
NC_010444.4	141276092	141276175	396578	intron	SLC23A1
NC_010444.4	141276092	141276175	396578	exon	SLC23A1
NC_010444.4	141276092	141276175	396578	utr5	SLC23A1
NC_010444.4	141276092	141276175	NC_010444.4:141275670:141277670	CGI_shore
NC_010444.4	141365829	141365890	100217389	intron	TMEM173
NC_010444.4	141365829	141365890	100217389	utr5	TMEM173
NC_010444.4	141365829	141365890	100217389	promoter	TMEM173
NC_010444.4	141469331	141469478	NC_010444.4:141469058:141469621	CGI
NC_010444.4	141487508	141487633	100524854	intron	CXXC5
NC_010444.4	141487840	141487931	100524854	intron	CXXC5
NC_010444.4	141984789	141984867	100521956	intron	CYSTM1
NC_010444.4	142960619	142960706	100515772	intron	LOC100515772
NC_010444.4	142960619	142960706	NC_010444.4:142959780:142961780	CGI_shore
NC_010444.4	142960619	142960706	Target=Pre0_SS:1-258;Class=SINE/tRNA	repeat
NC_010444.4	143056303	143056381	100736974	exon	LOC100736974
NC_010444.4	143056303	143056381	NC_010444.4:143055180:143057181	CGI_shore
NC_010444.4	143056303	143056381	NC_010444.4:143056013:143058013	CGI_shore
NC_010444.4	143056303	143056381	NC_010444.4:143056226:143057064	CGI
NC_010444.4	143498855	143499053	100626940	intron	PCDH1
NC_010444.4	143498855	143499053	NC_010444.4:143498854:143501013	CGI
NC_010444.4	143499231	143499673	100626940	intron	PCDH1
NC_010444.4	143499231	143499673	NC_010444.4:143498854:143501013	CGI
NC_010444.4	143499231	143499673	NC_010444.4:143499462:143501462	CGI_shore
NC_010444.4	144341748	144341930	100520606	intron	ARHGAP26
NC_010444.4	148234365	148234485	NC_010444.4:148233338:148234565	CGI
NC_010444.4	148234365	148234485	397089	promoter	PPP2R2B
NC_010444.4	148234365	148234485	397089	exon	PPP2R2B
NC_010444.4	148234365	148234485	397089	utr5	PPP2R2B
NC_010444.4	148234365	148234485	397089	intron	PPP2R2B
NC_010444.4	148365092	148365161	397089	intron	PPP2R2B
NC_010444.4	149900944	149901087	NC_010444.4:149900716:149901730	CGI
NC_010444.4	149900944	149901087	Target=G-rich:1-51;Class=Low_complexity	repeat
NC_010444.4	150220354	150220481	100624660	intron	SH3TC2
NC_010444.4	150603166	150603375	NC_010444.4:150602377:150604378	CGI_shore
NC_010444.4	150603166	150603375	NC_010444.4:150603097:150603357	CGI
NC_010444.4	150603166	150603375	NC_010444.4:150603357:150605358	CGI_shore
NC_010444.4	150679043	150679196	100514827	exon	ARHGEF37
NC_010444.4	150679043	150679196	NC_010444.4:150679035:150679341	CGI
NC_010444.4	150679043	150679196	100514827	intron	ARHGEF37
NC_010444.4	150807983	150808057	Target=Pre0_SS:1-251;Class=SINE/tRNA	repeat
NC_010444.4	151251266	151251354	100626014	utr3	CAMK2A
NC_010444.4	151251266	151251354	100626014	exon	CAMK2A
NC_010444.4	151251266	151251354	NC_010444.4:151250432:151252232	CGI
NC_010444.4	151251266	151251354	100626014	intron	CAMK2A
NC_010444.4	151294480	151294541	NC_010444.4:151292808:151294808	CGI_shore
NC_010444.4	151294480	151294541	NC_010444.4:151293606:151295607	CGI_shore
NC_010444.4	151294480	151294541	100626014	intron	CAMK2A
NC_010444.4	151418387	151418479	NC_010444.4:151418121:151420121	CGI_shore
NC_010444.4	151418387	151418479	NC_010444.4:151418272:151418710	CGI
NC_010444.4	151595769	151595958	110259543	intron	SYNPO
NC_010444.4	151595769	151595958	NC_010444.4:151595356:151597356	CGI_shore
NC_010444.4	151595769	151595958	NC_010444.4:151595663:151596468	CGI
NC_010445.4	202132	202320	NC_010445.4:200413:202414	CGI_shore
NC_010445.4	253546	253597	NC_010445.4:253282:255282	CGI_shore
NC_010445.4	325259	325341	NC_010445.4:319348:325419	CGI
NC_010445.4	596284	596391	NC_010445.4:594688:596688	CGI_shore
NC_010445.4	596284	596391	NC_010445.4:596133:596391	CGI
NC_010445.4	596284	596391	397453	intron	ADAP1
NC_010445.4	682845	683017	NC_010445.4:680958:682959	CGI_shore
NC_010445.4	682845	683017	NC_010445.4:681413:683413	CGI_shore
NC_010445.4	682845	683017	NC_010445.4:682139:683100	CGI
NC_010445.4	682845	683017	100738733	exon	GPR146
NC_010445.4	682845	683017	100738733	utr5	GPR146
NC_010445.4	682845	683017	100522484	intron	C3H7orf50
NC_010445.4	682845	683017	100738733	intron	GPR146
NC_010445.4	804369	804637	100523430	exon	UNCX
NC_010445.4	804369	804637	100523430	intron	UNCX
NC_010445.4	804369	804637	Target=(G)n:1-24;Class=Simple_repeat	repeat
NC_010445.4	804369	804637	Target=(GCGG)n:3-71;Class=Simple_repeat	repeat
NC_010445.4	804369	804637	NC_010445.4:800940:813976	CGI
NC_010445.4	1004229	1004342	100523779	intron	INTS1
NC_010445.4	1004229	1004342	100523779	exon	INTS1
NC_010445.4	1004229	1004342	NC_010445.4:979624:1005727	CGI
NC_010445.4	1373703	1373757	NC_010445.4:1367000:1374347	CGI
NC_010445.4	1373703	1373757	102157652	intron	MAD1L1
NC_010445.4	1453380	1453457	NC_010445.4:1451988:1453989	CGI_shore
NC_010445.4	1453380	1453457	NC_010445.4:1452845:1454845	CGI_shore
NC_010445.4	1453380	1453457	102157652	intron	MAD1L1
NC_010445.4	1640199	1640299	NC_010445.4:1639885:1640351	CGI
NC_010445.4	1779445	1779510	100270691	intron	GRIFIN
NC_010445.4	1779445	1779510	100270691	promoter	GRIFIN
NC_010445.4	1779445	1779510	NC_010445.4:1777589:1779590	CGI_shore
NC_010445.4	1779445	1779510	NC_010445.4:1778412:1780412	CGI_shore
NC_010445.4	1779445	1779510	100524978	intron	LFNG
NC_010445.4	1990012	1990068	NC_010445.4:1989307:1991307	CGI_shore
NC_010445.4	1990012	1990068	NC_010445.4:1989915:1991915	CGI_shore
NC_010445.4	1990012	1990068	100337670	intron	AMZ1
NC_010445.4	2137093	2137190	NC_010445.4:2136463:2138464	CGI_shore
NC_010445.4	2465170	2465392	NC_010445.4:2464598:2466531	CGI
NC_010445.4	2465745	2465857	NC_010445.4:2464598:2466531	CGI
NC_010445.4	2813047	2813103	NC_010445.4:2811278:2813278	CGI_shore
NC_010445.4	2813047	2813103	100512953	promoter	SDK1
NC_010445.4	3653563	3653614	100511556	intron	RADIL
NC_010445.4	3653563	3653614	NC_010445.4:3652179:3654179	CGI_shore
NC_010445.4	3666929	3667103	Target=(CACA)n:1-46;Class=Simple_repeat	repeat
NC_010445.4	3666929	3667103	100511556	intron	RADIL
NC_010445.4	3992595	3992939	100515017	intron	TNRC18
NC_010445.4	3992595	3992939	NC_010445.4:3991274:4001750	CGI
NC_010445.4	4000696	4000757	110260072	promoter	LOC110260072
NC_010445.4	4000696	4000757	NC_010445.4:3991274:4001750	CGI
NC_010445.4	4135777	4135967	NC_010445.4:4133904:4136379	CGI
NC_010445.4	4135777	4135967	100286741	intron	FSCN1
NC_010445.4	4136035	4136088	NC_010445.4:4133904:4136379	CGI
NC_010445.4	4136035	4136088	100286741	intron	FSCN1
NC_010445.4	4671131	4671246	110259844	intron	GRID2IP
NC_010445.4	5567267	5567382	NC_010445.4:5566914:5568221	CGI
NC_010445.4	5567267	5567382	100521439	intron	BAIAP2L1
NC_010445.4	5567666	5567924	NC_010445.4:5566914:5568221	CGI
NC_010445.4	5567666	5567924	100521439	exon	BAIAP2L1
NC_010445.4	5567666	5567924	100521439	utr5	BAIAP2L1
NC_010445.4	5567666	5567924	Target=(CGC)n:1-25;Class=Simple_repeat	repeat
NC_010445.4	5567666	5567924	Target=(GGCGG)n:1-154;Class=Simple_repeat	repeat
NC_010445.4	6136834	6136933	100621443	intron	SMURF1
NC_010445.4	6618362	6618466	100144468	intron	CYP3A22
NC_010445.4	7837679	7837823	NC_010445.4:7837047:7837827	CGI
NC_010445.4	7837679	7837823	100525393	promoter	TRIM4
NC_010445.4	7837679	7837823	110259868	exon
NC_010445.4	7837679	7837823	110259868	intron
NC_010445.4	8170004	8170069	100526100	intron	LAMTOR4
NC_010445.4	8170004	8170069	NC_010445.4:8168597:8170597	CGI_shore
NC_010445.4	8170004	8170069	100511123	promoter	GAL3ST4
NC_010445.4	8170004	8170069	100511316	exon	GPC2
NC_010445.4	8363323	8363825	100513464	intron	PPP1R35
NC_010445.4	8363323	8363825	NC_010445.4:8363272:8363956	CGI
NC_010445.4	8363323	8363825	100513464	exon	PPP1R35
NC_010445.4	8527466	8527607	NC_010445.4:8526790:8527779	CGI
NC_010445.4	8527466	8527607	100627524	intron	PCOLCE
NC_010445.4	8527466	8527607	100627436	intron	FBXO24
NC_010445.4	8527466	8527607	100627524	exon	PCOLCE
NC_010445.4	8527466	8527607	100627436	exon	FBXO24
NC_010445.4	8527466	8527607	100627436	utr3	FBXO24
NC_010445.4	9389543	9389602	NC_010445.4:9388752:9390752	CGI_shore
NC_010445.4	9389543	9389602	NC_010445.4:9389348:9389733	CGI
NC_010445.4	9389543	9389602	NC_010445.4:9389422:9391422	CGI_shore
NC_010445.4	9389543	9389602	100521258	intron	CUX1
NC_010445.4	9449919	9450018	NC_010445.4:9448896:9450896	CGI_shore
NC_010445.4	9449919	9450018	100521258	intron	CUX1
NC_010445.4	9681254	9681461	100519708	intron	SH2B2
NC_010445.4	9681254	9681461	NC_010445.4:9681209:9683209	CGI_shore
NC_010445.4	10933958	10934030	NC_010445.4:10933884:10934624	CGI
NC_010445.4	10933958	10934030	100170769	exon	MLXIPL
NC_010445.4	10933958	10934030	100170769	utr5	MLXIPL
NC_010445.4	11365989	11366162	100627864	intron	LAT2
NC_010445.4	11365989	11366162	NC_010445.4:11365959:11366162	CGI
NC_010445.4	11365989	11366162	100627864	exon	LAT2
NC_010445.4	12376136	12376205	Target=Pre0_SS:1-260;Class=SINE/tRNA	repeat
NC_010445.4	12376136	12376205	102157744	intron
NC_010445.4	14637008	14637087	100515476	intron	AUTS2
NC_010445.4	14701083	14701245	NC_010445.4:14700839:14702749	CGI
NC_010445.4	14701083	14701245	100515476	intron	AUTS2
NC_010445.4	14701655	14701766	NC_010445.4:14700839:14702749	CGI
NC_010445.4	14701655	14701766	100515476	intron	AUTS2
NC_010445.4	16631004	16631078	Target=Pre0_SS:2-232;Class=SINE/tRNA	repeat
NC_010445.4	16783795	16783876	102162776	intron
NC_010445.4	17093217	17093278	NC_010445.4:17093178:17094368	CGI
NC_010445.4	17093217	17093278	100623028	TES	TGFB1I1
NC_010445.4	17093217	17093278	100623028	utr3	TGFB1I1
NC_010445.4	17093217	17093278	100623028	exon	TGFB1I1
NC_010445.4	17358078	17358237	100522730	exon	PRSS8
NC_010445.4	17358078	17358237	100522730	intron	PRSS8
NC_010445.4	17358078	17358237	Target=G-rich:1-40;Class=Low_complexity	repeat
NC_010445.4	18044115	18044166	NC_010445.4:18041755:18044228	CGI
NC_010445.4	18044115	18044166	100622994	exon	MAZ
NC_010445.4	18254541	18254604	110260081	promoter	ALDOA
NC_010445.4	18254541	18254604	110260081	intron	ALDOA
NC_010445.4	18254541	18254604	NC_010445.4:18254073:18255548	CGI
NC_010445.4	18254541	18254604	Target=(CCGCCG)n:1-44;Class=Simple_repeat	repeat
NC_010445.4	19509035	19509134	Target=L2c:2975-3196;Class=LINE/L2	repeat
NC_010445.4	19815651	19815774	Target=Pre0_SS:1-260;Class=SINE/tRNA	repeat
NC_010445.4	22549101	22549188	NC_010445.4:22548741:22549800	CGI
NC_010445.4	22549101	22549188	396953	exon	PLK1
NC_010445.4	23036278	23036443	NC_010445.4:23036381:23038382	CGI_shore
NC_010445.4	23036278	23036443	Target=L2b:3247-3375;Class=LINE/L2	repeat
NC_010445.4	23036278	23036443	NC_010445.4:23034957:23036381	CGI
NC_010445.4	23036278	23036443	102162297	intron	USP31
NC_010445.4	23921912	23922009	100523723	intron	EEF2K
NC_010445.4	23921912	23922009	100523723	exon	EEF2K
NC_010445.4	25669056	25669204	Target=MLT1O:69-296;Class=LTR/ERVL-MaLR	repeat
NC_010445.4	25669056	25669204	Target=Pre0_SS:1-260;Class=SINE/tRNA	repeat
NC_010445.4	25884378	25884446	NC_010445.4:25882629:25884630	CGI_shore
NC_010445.4	25884378	25884446	Target=Pre0_SS:1-256;Class=SINE/tRNA	repeat
NC_010445.4	25884378	25884446	100623340	intron	GPRC5B
NC_010445.4	26249230	26249313	Target=Pre0_SS:1-260;Class=SINE/tRNA	repeat
NC_010445.4	26249230	26249313	100623809	intron	TMC5
NC_010445.4	26447868	26448006	NC_010445.4:26446713:26448206	CGI
NC_010445.4	26447868	26448006	100513981	promoter	SYT17
NC_010445.4	26447868	26448006	100513981	intron	SYT17
NC_010445.4	27232642	27232760	100514160	intron	XYLT1
NC_010445.4	27287016	27287120	100514160	intron	XYLT1
NC_010445.4	27492213	27492444	NC_010445.4:27490777:27492777	CGI_shore
NC_010445.4	27492213	27492444	NC_010445.4:27492145:27492611	CGI
NC_010445.4	27492213	27492444	100514160	exon	XYLT1
NC_010445.4	28709032	28709136	Target=Tigger17a:1-587;Class=DNA/TcMar-Tigger	repeat
NC_010445.4	28709032	28709136	100515887	intron	PARN
NC_010445.4	30272245	30272296	NC_010445.4:30271132:30273133	CGI_shore
NC_010445.4	30272245	30272296	NC_010445.4:30271289:30274164	CGI
NC_010445.4	30272245	30272296	106509691	exon	SHISA9
NC_010445.4	30645345	30645399	100626399	intron	SNX29
NC_010445.4	31043566	31043720	100626399	intron	SNX29
NC_010445.4	31941413	31941513	100519828	intron	CLEC16A
NC_010445.4	32749959	32750011	100736832	exon	GRIN2A
NC_010445.4	32749959	32750011	100736832	utr5	GRIN2A
NC_010445.4	32749959	32750011	NC_010445.4:32749198:32752639	CGI
NC_010445.4	37071504	37071607	100522863	intron	RBFOX1
NC_010445.4	37796617	37796670	Target=Pre0_SS:1-260;Class=SINE/tRNA	repeat
NC_010445.4	37796617	37796670	100738369	intron	C3H16orf96
NC_010445.4	38493110	38493288	100620215	intron	CREBBP
NC_010445.4	38493110	38493288	Target=Pre0_SS:1-246;Class=SINE/tRNA	repeat
NC_010445.4	38699030	38699168	106509712	intron
NC_010445.4	38699030	38699168	100135669	intron	NLRC3
NC_010445.4	39001721	39001782	100516963	exon	LOC100516963
NC_010445.4	39261577	39261816	NC_010445.4:39260955:39262037	CGI
NC_010445.4	39261577	39261816	100627929	promoter	FLYWCH2
NC_010445.4	39261577	39261816	100627929	intron	FLYWCH2
NC_010445.4	39261577	39261816	100627929	exon	FLYWCH2
NC_010445.4	39261577	39261816	100627929	utr5	FLYWCH2
NC_010445.4	39261577	39261816	Target=(CCCCGC)n:1-93;Class=Simple_repeat	repeat
NC_010445.4	39323080	39323177	Target=Pre0_SS:1-260;Class=SINE/tRNA	repeat
NC_010445.4	39978765	39978878	100515947	intron	SYNGR3
NC_010445.4	39978765	39978878	NC_010445.4:39977258:39979259	CGI_shore
NC_010445.4	39978765	39978878	100515947	exon	SYNGR3
NC_010445.4	39978765	39978878	NC_010445.4:39978486:39979284	CGI
NC_010445.4	39978765	39978878	100515947	utr5	SYNGR3
NC_010445.4	40024520	40024705	NC_010445.4:40023915:40024705	CGI
NC_010445.4	40412026	40412093	100626534	intron	CLCN7
NC_010445.4	40412026	40412093	100626534	exon	CLCN7
NC_010445.4	40412026	40412093	NC_010445.4:40409371:40419938	CGI
NC_010445.4	41063914	41063964	100519829	exon	METRN
NC_010445.4	41063914	41063964	NC_010445.4:41063591:41064555	CGI
NC_010445.4	41082084	41082291	NC_010445.4:41080480:41082510	CGI
NC_010445.4	41082084	41082291	100511074	exon	FBXL16
NC_010445.4	41082084	41082291	100511074	utr3	FBXL16
NC_010445.4	41082084	41082291	Target=(CCGCC)n:1-43;Class=Simple_repeat	repeat
NC_010445.4	41082084	41082291	Target=(CGCA)n:1-22;Class=Simple_repeat	repeat
NC_010445.4	41082084	41082291	Target=(CCCG)n:1-67;Class=Simple_repeat	repeat
NC_010445.4	41099581	41099705	NC_010445.4:41097691:41099691	CGI_shore
NC_010445.4	41099581	41099705	NC_010445.4:41098648:41100649	CGI_shore
NC_010445.4	41099581	41099705	102164926	exon	RHBDL1
NC_010445.4	41099581	41099705	102164926	utr5	RHBDL1
NC_010445.4	41099581	41099705	Target=(CTCCG)n:1-48;Class=Simple_repeat	repeat
NC_010445.4	41099581	41099705	102164926	promoter	RHBDL1
NC_010445.4	41099581	41099705	102164926	TSS	RHBDL1
NC_010445.4	41099581	41099705	Target=(CGCCGC)n:1-81;Class=Simple_repeat	repeat
NC_010445.4	41099581	41099705	NC_010445.4:41099692:41100090	CGI
NC_010445.4	41187507	41187597	100739103	exon	PRR35
NC_010445.4	41187507	41187597	100739103	utr5	PRR35
NC_010445.4	41187507	41187597	NC_010445.4:41186102:41188102	CGI_shore
NC_010445.4	41187507	41187597	NC_010445.4:41186323:41188324	CGI_shore
NC_010445.4	41193108	41193269	100523542	intron	CAPN15
NC_010445.4	41193108	41193269	Target=(CCGGCT)n:1-43;Class=Simple_repeat	repeat
NC_010445.4	41193108	41193269	100523542	exon	CAPN15
NC_010445.4	41213042	41213208	NC_010445.4:41211944:41213443	CGI
NC_010445.4	41213042	41213208	100519135	intron	RAB11FIP3
NC_010445.4	41213042	41213208	100519135	exon	RAB11FIP3
NC_010445.4	42711086	42711171	NC_010445.4:42709253:42711253	CGI_shore
NC_010445.4	42711086	42711171	102157981	promoter	WNK2
NC_010445.4	44858505	44858687	106509733	intron
NC_010445.4	44858505	44858687	110259966	intron
NC_010445.4	44901336	44901421	106509733	intron
NC_010445.4	45913813	45913885	100524248	intron	KCNIP3
NC_010445.4	45913813	45913885	Target=HAL1:1964-2221;Class=LINE/L1	repeat
NC_010445.4	46111402	46111610	100521442	exon	ZNF514
NC_010445.4	46111402	46111610	100521442	utr5	ZNF514
NC_010445.4	46111402	46111610	NC_010445.4:46110975:46111620	CGI
NC_010445.4	46111402	46111610	Target=(GAG)n:1-27;Class=Simple_repeat	repeat
NC_010445.4	47052651	47052913	NC_010445.4:47052333:47053125	CGI
NC_010445.4	47052651	47052913	100622812	exon	DUSP2
NC_010445.4	47052651	47052913	Target=(GCCC)n:1-66;Class=Simple_repeat	repeat
NC_010445.4	48715454	48715505	Target=Pre0_SS:1-259;Class=SINE/tRNA	repeat
NC_010445.4	48715454	48715505	Target=(GTTTTT)n:5-18;Class=Simple_repeat	repeat
NC_010445.4	48715454	48715505	100512775	intron	ST6GAL2
NC_010445.4	49046148	49046221	Target=L1ME1:5289-6179;Class=LINE/L1	repeat
NC_010445.4	59110571	59110663	397296	intron	SFTPB
NC_010445.4	59110571	59110663	397296	exon	SFTPB
NC_010445.4	59806608	59806750	NC_010445.4:59805659:59807659	CGI_shore
NC_010445.4	59806608	59806750	NC_010445.4:59806553:59807393	CGI
NC_010445.4	59806608	59806750	100524432	exon	TRABD2A
NC_010445.4	59806608	59806750	Target=G-rich:1-50;Class=Low_complexity	repeat
NC_010445.4	59806608	59806750	Target=(GCC)n:1-19;Class=Simple_repeat	repeat
NC_010445.4	64417879	64417964	100525337	exon	CTNNA2
NC_010445.4	64417879	64417964	100525337	utr5	CTNNA2
NC_010445.4	64417879	64417964	NC_010445.4:64417792:64418095	CGI
NC_010445.4	68534789	68534907	100514453	utr5	TLX2
NC_010445.4	68534789	68534907	NC_010445.4:68532701:68535939	CGI
NC_010445.4	68534789	68534907	100514453	exon	TLX2
NC_010445.4	68622891	68622997	100513788	exon	C3H2orf81
NC_010445.4	68622891	68622997	100513982	promoter	LOC100513982
NC_010445.4	68622891	68622997	NC_010445.4:68622788:68624789	CGI_shore
NC_010445.4	71245812	71245904	NC_010445.4:71244329:71246329	CGI_shore
NC_010445.4	71563564	71563620	NC_010445.4:71561702:71563702	CGI_shore
NC_010445.4	71563564	71563620	100523368	intron	ATP6V1B1
NC_010445.4	71563564	71563620	Target=Pre0_SS:1-260;Class=SINE/tRNA	repeat
NC_010445.4	71621312	71621382	NC_010445.4:71621062:71622408	CGI
NC_010445.4	71621312	71621382	100739541	intron	VAX2
NC_010445.4	72379724	72379782	102163220	promoter	ASPRV1
NC_010445.4	72379724	72379782	100511501	exon	PCBP1
NC_010445.4	72379724	72379782	NC_010445.4:72379480:72381717	CGI
NC_010445.4	72379724	72379782	102163220	intron	ASPRV1
NC_010445.4	75625179	75625296	100517152	intron	MEIS1
NC_010445.4	75625179	75625296	NC_010445.4:75623766:75625766	CGI_shore
NC_010445.4	75625179	75625296	100517152	exon	MEIS1
NC_010445.4	75625179	75625296	100517152	utr5	MEIS1
NC_010445.4	75625179	75625296	106509799	promoter
NC_010445.4	75625179	75625296	NC_010445.4:75624451:75626451	CGI_shore
NC_010445.4	75625179	75625296	100517152	promoter	MEIS1
NC_010445.4	75625179	75625296	NC_010445.4:75625004:75625317	CGI
NC_010445.4	78362228	78362372	110260000	exon	LOC110260000
NC_010445.4	78362228	78362372	NC_010445.4:78361282:78362614	CGI
NC_010445.4	78362228	78362372	NC_010445.4:78361863:78363863	CGI_shore
NC_010445.4	86784748	86784908	100516258	promoter	SPTBN1
NC_010445.4	86784748	86784908	NC_010445.4:86783397:86784793	CGI
NC_010445.4	86784748	86784908	106508926	intron	LOC106508926
NC_010445.4	86784748	86784908	NC_010445.4:86784793:86786794	CGI_shore
NC_010445.4	91964356	91964453	NC_010445.4:91964312:91964685	CGI
NC_010445.4	91964356	91964453	407247	TSS	LHCGR
NC_010445.4	91964356	91964453	407247	utr5	LHCGR
NC_010445.4	91964356	91964453	407247	exon	LHCGR
NC_010445.4	91964356	91964453	407247	promoter	LHCGR
NC_010445.4	94254195	94254310	NC_010445.4:94252035:94254714	CGI
NC_010445.4	94254195	94254310	100037272	promoter	EPAS1
NC_010445.4	94254195	94254310	Target=(GCCC)n:1-72;Class=Simple_repeat	repeat
NC_010445.4	97285279	97285393	106509842	promoter
NC_010445.4	97285279	97285393	106509839	exon
NC_010445.4	97285279	97285393	106509839	intron
NC_010445.4	97285279	97285393	106509842	TSS
NC_010445.4	97285279	97285393	106509842	exon
NC_010445.4	100559511	100559635	100517336	intron	THUMPD2
NC_010445.4	100559511	100559635	NC_010445.4:100559236:100559540	CGI
NC_010445.4	100559511	100559635	NC_010445.4:100559540:100561541	CGI_shore
NC_010445.4	105860838	105860975	NC_010445.4:105860428:105861194	CGI
NC_010445.4	108134193	108134537	NC_010445.4:108132332:108134332	CGI_shore
NC_010445.4	108134193	108134537	100621933	utr5	EHD3
NC_010445.4	108134193	108134537	Target=G-rich:1-50;Class=Low_complexity	repeat
NC_010445.4	108134193	108134537	100621933	exon	EHD3
NC_010445.4	108134193	108134537	NC_010445.4:108134333:108135076	CGI
NC_010445.4	108223770	108223838	100738063	promoter	GALNT14
NC_010445.4	108223770	108223838	NC_010445.4:108223220:108224622	CGI
NC_010445.4	108223770	108223838	100738063	utr5	GALNT14
NC_010445.4	108223770	108223838	100738063	exon	GALNT14
NC_010445.4	111286282	111286357	Target=Pre0_SS:1-259;Class=SINE/tRNA	repeat
NC_010445.4	111286282	111286357	100623966	intron	BABAM2
NC_010445.4	112252821	112253018	NC_010445.4:112250919:112253609	CGI
NC_010445.4	112252821	112253018	100511810	exon	DPYSL5
NC_010445.4	112252821	112253018	100511810	utr5	DPYSL5
NC_010445.4	112252821	112253018	Target=(GCG)n:1-47;Class=Simple_repeat	repeat
NC_010445.4	112252821	112253018	Target=(GCTC)n:1-34;Class=Simple_repeat	repeat
NC_010445.4	112252821	112253018	100511810	TSS	DPYSL5
NC_010445.4	112252821	112253018	100511810	promoter	DPYSL5
NC_010445.4	112816940	112817015	100513275	intron	GAREM2
NC_010445.4	112816940	112817015	NC_010445.4:112816323:112817925	CGI
NC_010445.4	113503801	113503968	NC_010445.4:113502110:113504784	CGI
NC_010445.4	113503801	113503968	100037301	promoter	DNMT3A
NC_010445.4	113503801	113503968	Target=(CGG)n:1-72;Class=Simple_repeat	repeat
NC_010445.4	113503801	113503968	Target=G-rich:15-111;Class=Low_complexity	repeat
NC_010445.4	113503801	113503968	100037301	intron	DNMT3A
NC_010445.4	113547562	113547652	NC_010445.4:113545753:113547753	CGI_shore
NC_010445.4	113547562	113547652	100037301	intron	DNMT3A
NC_010445.4	115010103	115010180	NC_010445.4:115008435:115010436	CGI_shore
NC_010445.4	115010103	115010180	Target=L2b:1873-2380;Class=LINE/L2	repeat
NC_010445.4	119831006	119831084	Target=PRE1e:1-238;Class=SINE/tRNA	repeat
NC_010445.4	120318184	120318281	100627113	promoter	RAD51AP2
NC_010445.4	120318184	120318281	NC_010445.4:120317978:120318449	CGI
NC_010445.4	120318184	120318281	100627113	TSS	RAD51AP2
NC_010445.4	120318184	120318281	100627113	utr5	RAD51AP2
NC_010445.4	120318184	120318281	100627113	exon	RAD51AP2
NC_010445.4	126197266	126197454	Target=MLT1D:230-354;Class=LTR/ERVL-MaLR	repeat
NC_010445.4	126197266	126197454	100144506	intron	HPCAL1
NC_010445.4	126280452	126280508	NC_010445.4:126278937:126280937	CGI_shore
NC_010445.4	126429411	126429469	100174954	intron	KLF11
NC_010445.4	126429411	126429469	NC_010445.4:126428591:126430291	CGI
NC_010445.4	126429709	126429967	NC_010445.4:126428591:126430291	CGI
NC_010445.4	126429709	126429967	100174954	exon	KLF11
NC_010445.4	126429709	126429967	100174954	utr5	KLF11
NC_010445.4	126429709	126429967	100174954	TSS	KLF11
NC_010445.4	126429709	126429967	100174954	promoter	KLF11
NC_010445.4	126511592	126511664	100738560	promoter	GRHL1
NC_010445.4	126511592	126511664	NC_010445.4:126510477:126511819	CGI
NC_010445.4	126980444	126980507	NC_010445.4:126980326:126980767	CGI
NC_010445.4	126980444	126980507	100513350	intron	ASAP2
NC_010445.4	127244966	127245071	NC_010445.4:127244510:127246511	CGI_shore
NC_010445.4	127244966	127245071	100623089	intron	MBOAT2
NC_010445.4	127508419	127508469	NC_010445.4:127507090:127509091	CGI_shore
NC_010445.4	127508419	127508469	NC_010445.4:127508030:127509045	CGI
NC_010445.4	127508419	127508469	106509912	intron
NC_010445.4	127524510	127524576	106509912	intron
NC_010445.4	127524510	127524576	102160712	promoter
NC_010445.4	127524510	127524576	102160712	exon
NC_010445.4	127558311	127558424	102160793	intron
NC_010445.4	128813201	128813265	NC_010445.4:128812999:128813265	CGI
NC_010445.4	128813201	128813265	100514456	intron	RNF144A
NC_010445.4	128867022	128867234	100514456	promoter	RNF144A
NC_010445.4	128867022	128867234	NC_010445.4:128866641:128867491	CGI
NC_010445.4	128867022	128867234	100514456	exon	RNF144A
NC_010445.4	128867022	128867234	100514456	utr5	RNF144A
NC_010445.4	128903535	128903848	100623872	utr5	CMPK2
NC_010445.4	128903535	128903848	100623872	exon	CMPK2
NC_010445.4	128903535	128903848	NC_010445.4:128903431:128904335	CGI
NC_010445.4	128903964	128904028	100623872	exon	CMPK2
NC_010445.4	128903964	128904028	NC_010445.4:128903431:128904335	CGI
NC_010445.4	129580296	129580354	Target=Pre0_SS:1-253;Class=SINE/tRNA	repeat
NC_010445.4	129832060	129832134	Target=Pre0_SS:1-257;Class=SINE/tRNA	repeat
NC_010445.4	131284080	131284219	NC_010445.4:131282947:131284947	CGI_shore
NC_010445.4	131284080	131284219	Target=L2a:2936-3422;Class=LINE/L2	repeat
NC_010445.4	131284080	131284219	NC_010445.4:131283474:131285474	CGI_shore
NC_010445.4	131284080	131284219	NC_010445.4:131283536:131285537	CGI_shore
NC_010445.4	131288411	131288537	NC_010445.4:131286853:131288854	CGI_shore
NC_010445.4	131288411	131288537	NC_010445.4:131287595:131289595	CGI_shore
NC_010445.4	131288411	131288537	Target=Charlie1a:578-1043;Class=DNA/hAT-Charlie	repeat
NC_010445.4	132196961	132197017	100626723	intron	MYT1L
NC_010445.4	132488470	132488659	NC_010445.4:132487110:132489111	CGI_shore
NC_010445.4	132812367	132812456	110260067	promoter
NC_010445.4	132812367	132812456	100624418	intron	FAM110C
NC_010445.4	132812367	132812456	100624418	exon	FAM110C
NC_010445.4	132812367	132812456	NC_010445.4:132811513:132812686	CGI
NC_010446.5	282299	282445	100524251	intron	LRRC14
NC_010446.5	282299	282445	NC_010446.5:280551:282552	CGI_shore
NC_010446.5	282299	282445	100524082	exon	LRRC24
NC_010446.5	282299	282445	NC_010446.5:281848:282850	CGI
NC_010446.5	282299	282445	NC_010446.5:282267:284267	CGI_shore
NC_010446.5	672021	672147	NC_010446.5:670243:672244	CGI_shore
NC_010446.5	672021	672147	NC_010446.5:671711:673712	CGI_shore
NC_010446.5	698923	699033	NC_010446.5:694878:699924	CGI
NC_010446.5	698923	699033	110260403	promoter	PLEC
NC_010446.5	698923	699033	110260403	intron	PLEC
NC_010446.5	699291	699383	NC_010446.5:694878:699924	CGI
NC_010446.5	699291	699383	110260403	promoter	PLEC
NC_010446.5	699291	699383	110260403	intron	PLEC
NC_010446.5	699639	699884	NC_010446.5:694878:699924	CGI
NC_010446.5	699639	699884	Target=(GCCGCCG)n:1-73;Class=Simple_repeat	repeat
NC_010446.5	699639	699884	Target=(GCCCC)n:1-49;Class=Simple_repeat	repeat
NC_010446.5	699639	699884	Target=(CCCCGC)n:1-44;Class=Simple_repeat	repeat
NC_010446.5	699639	699884	110260403	intron	PLEC
NC_010446.5	983593	983745	NC_010446.5:983274:984481	CGI
NC_010446.5	983593	983745	403161	exon	NAPRT
NC_010446.5	983593	983745	403161	intron	NAPRT
NC_010446.5	983593	983745	NC_010446.5:981700:983701	CGI_shore
NC_010446.5	996366	996580	NC_010446.5:995741:997741	CGI_shore
NC_010446.5	996366	996580	100515607	intron	GSDMD
NC_010446.5	996366	996580	100515607	exon	GSDMD
NC_010446.5	1114542	1114607	NC_010446.5:1114497:1114704	CGI
NC_010446.5	1114542	1114607	NC_010446.5:1113239:1115239	CGI_shore
NC_010446.5	1236046	1236097	100517712	exon
NC_010446.5	1236046	1236097	NC_010446.5:1236005:1236664	CGI
NC_010446.5	1476451	1476507	NC_010446.5:1476018:1478019	CGI_shore
NC_010446.5	1476451	1476507	110260200	promoter	THEM6
NC_010446.5	1476451	1476507	110260199	intron	JRK
NC_010446.5	1594276	1594382	110260204	intron	ADGRB1
NC_010446.5	1594276	1594382	NC_010446.5:1593164:1595165	CGI_shore
NC_010446.5	1594276	1594382	Target=(CCT)n:1-43;Class=Simple_repeat	repeat
NC_010446.5	1597992	1598100	NC_010446.5:1597881:1599881	CGI_shore
NC_010446.5	1597992	1598100	110260204	intron	ADGRB1
NC_010446.5	1616755	1616812	NC_010446.5:1614806:1616806	CGI_shore
NC_010446.5	1616755	1616812	NC_010446.5:1616807:1617065	CGI
NC_010446.5	1616755	1616812	110260204	intron	ADGRB1
NC_010446.5	1735620	1735743	110260205	intron	TSNARE1
NC_010446.5	1735620	1735743	110260205	exon	TSNARE1
NC_010446.5	1735620	1735743	110260205	utr3	TSNARE1
NC_010446.5	1756245	1756302	NC_010446.5:1755675:1757675	CGI_shore
NC_010446.5	1756245	1756302	NC_010446.5:1756156:1758156	CGI_shore
NC_010446.5	1756245	1756302	110260205	intron	TSNARE1
NC_010446.5	1892436	1892496	Target=L1MCa:3483-3615;Class=LINE/L1	repeat
NC_010446.5	2064428	2064531	NC_010446.5:2063338:2065338	CGI_shore
NC_010446.5	2398226	2398289	100620399	intron	GPR20
NC_010446.5	2398226	2398289	Target=L2c:3062-3176;Class=LINE/L2	repeat
NC_010446.5	2515024	2515100	NC_010446.5:2510427:2518859	CGI
NC_010446.5	2515024	2515100	100154055	intron	SLC45A4
NC_010446.5	3258277	3258353	NC_010446.5:3257252:3259252	CGI_shore
NC_010446.5	3258277	3258353	Target=MIRb:125-233;Class=SINE/MIR	repeat
NC_010446.5	3258277	3258353	100152043	intron	TRAPPC9
NC_010446.5	6354071	6354156	100155706	intron	KHDRBS3
NC_010446.5	6354071	6354156	NC_010446.5:6353531:6354332	CGI
NC_010446.5	6933034	6933150	Target=MLT1I:63-397;Class=LTR/ERVL-MaLR	repeat
NC_010446.5	10236205	10236279	Target=Pre0_SS:1-260;Class=SINE/tRNA	repeat
NC_010446.5	10236205	10236279	106509950	intron	ASAP1
NC_010446.5	14118382	14118465	Target=Pre0_SS:1-256;Class=SINE/tRNA	repeat
NC_010446.5	16355171	16355338	102162152	intron
NC_010446.5	16355171	16355338	110260229	exon
NC_010446.5	16355171	16355338	Target=PRE1f2:2-211;Class=SINE/tRNA	repeat
NC_010446.5	17584037	17584111	NC_010446.5:17582458:17584458	CGI_shore
NC_010446.5	17584037	17584111	106509979	exon
NC_010446.5	17584037	17584111	106509979	intron
NC_010446.5	17584037	17584111	397120	utr5	SHAS2
NC_010446.5	17584037	17584111	397120	intron	SHAS2
NC_010446.5	27605824	27605882	Target=Pre0_SS:1-258;Class=SINE/tRNA	repeat
NC_010446.5	32427949	32428049	110260243	intron
NC_010446.5	33763343	33763417	100152510	intron	CTHRC1
NC_010446.5	33763343	33763417	Target=Pre0_SS:1-249;Class=SINE/tRNA	repeat
NC_010446.5	38817136	38817190	Target=Pre0_SS:1-260;Class=SINE/tRNA	repeat
NC_010446.5	38817136	38817190	100155607	intron	MATN2
NC_010446.5	39411788	39411848	Target=PRE1b:7-261;Class=SINE/tRNA	repeat
NC_010446.5	40473050	40473163	NC_010446.5:40472366:40476373	CGI
NC_010446.5	40473050	40473163	110260254	utr5	GDF6
NC_010446.5	40473050	40473163	110260254	exon	GDF6
NC_010446.5	48587074	48587148	Target=Pre0_SS:1-260;Class=SINE/tRNA	repeat
NC_010446.5	48587074	48587148	100153257	intron	MMP16
NC_010446.5	59251834	59251978	100152963	promoter	PEX2
NC_010446.5	59251834	59251978	NC_010446.5:59251744:59252359	CGI
NC_010446.5	59582457	59582521	100514045	promoter	ZFHX4
NC_010446.5	61952790	61952847	Target=Pre0_SS:1-260;Class=SINE/tRNA	repeat
NC_010446.5	64154406	64154481	100737938	promoter	EYA1
NC_010446.5	64154406	64154481	100737938	exon	EYA1
NC_010446.5	64154406	64154481	100737938	utr5	EYA1
NC_010446.5	64154406	64154481	NC_010446.5:64154271:64154554	CGI
NC_010446.5	64154406	64154481	100737938	intron	EYA1
NC_010446.5	65440154	65440214	NC_010446.5:65439183:65441884	CGI
NC_010446.5	65440154	65440214	100157250	intron	SLCO5A1
NC_010446.5	65440154	65440214	Target=(GT)n:1-41;Class=Simple_repeat	repeat
NC_010446.5	66446603	66446663	NC_010446.5:66446322:66446747	CGI
NC_010446.5	66446603	66446663	100524083	intron	C4H8orf34
NC_010446.5	69074305	69074419	110260285	intron
NC_010446.5	71746100	71746188	Target=Pre0_SS:1-257;Class=SINE/tRNA	repeat
NC_010446.5	74675315	74675414	100156516	exon	FAM110B
NC_010446.5	74675315	74675414	100156516	utr5	FAM110B
NC_010446.5	74675315	74675414	100156516	intron	FAM110B
NC_010446.5	79216474	79216544	104797363	promoter
NC_010446.5	79562814	79563042	NC_010446.5:79560895:79562895	CGI_shore
NC_010446.5	79562814	79563042	Target=(GGCAG)n:1-101;Class=Simple_repeat	repeat
NC_010446.5	79562814	79563042	NC_010446.5:79562896:79563292	CGI
NC_010446.5	83873807	83873868	100153962	exon	DUSP27
NC_010446.5	84597291	84597475	100153010	promoter	FAM78B
NC_010446.5	84597291	84597475	NC_010446.5:84596998:84599084	CGI
NC_010446.5	84597291	84597475	106508330	intron
NC_010446.5	85497725	85497777	100513081	intron	LMX1A
NC_010446.5	89082383	89083039	NC_010446.5:89082213:89086179	CGI
NC_010446.5	89082383	89083039	Target=(AGGGTCGG)n:1-83;Class=Simple_repeat	repeat
NC_010446.5	89082383	89083039	Target=(C)n:1-30;Class=Simple_repeat	repeat
NC_010446.5	89082383	89083039	Target=(GGCGGCC)n:1-58;Class=Simple_repeat	repeat
NC_010446.5	91321396	91321486	Target=Pre0_SS:1-260;Class=SINE/tRNA	repeat
NC_010446.5	93252381	93252438	NC_010446.5:93251995:93253996	CGI_shore
NC_010446.5	93252381	93252438	100155702	intron	INSRR
NC_010446.5	93252381	93252438	NC_010446.5:93252371:93252625	CGI
NC_010446.5	93252381	93252438	100155702	exon	INSRR
NC_010446.5	95973278	95973414	NC_010446.5:95972142:95973649	CGI
NC_010446.5	95973278	95973414	100153508	exon	NPR1
NC_010446.5	95973278	95973414	100153508	utr5	NPR1
NC_010446.5	98041100	98041175	Target=Pre0_SS:1-260;Class=SINE/tRNA	repeat
NC_010446.5	98041100	98041175	100624272	intron	PIP5K1A
NC_010446.5	99380241	99380379	102165219	exon	ANKRD34A
NC_010446.5	99380241	99380379	NC_010446.5:99379917:99381357	CGI
NC_010446.5	99380241	99380379	100152157	exon	POLR3GL
NC_010446.5	99380241	99380379	100152157	utr5	POLR3GL
NC_010446.5	99380241	99380379	100152157	TSS	POLR3GL
NC_010446.5	99380241	99380379	100152157	promoter	POLR3GL
NC_010446.5	100442619	100442696	102166500	exon
NC_010446.5	100442619	100442696	102166500	promoter
NC_010446.5	100442619	100442696	NC_010446.5:100441980:100443980	CGI_shore
NC_010446.5	100442619	100442696	NC_010446.5:100442008:100444009	CGI_shore
NC_010446.5	105845746	105845803	100739349	promoter	NRAS
NC_010446.5	105845746	105845803	NC_010446.5:105845744:105845983	CGI
NC_010446.5	105954785	105954985	Target=Pre0_SS:1-260;Class=SINE/tRNA	repeat
NC_010446.5	106035398	106035519	Target=MER31_BT:1-672;Class=LTR/ERV1	repeat
NC_010446.5	106035398	106035519	106507446	exon
NC_010446.5	106425670	106425722	100152816	utr5	SYT6
NC_010446.5	106425670	106425722	100152816	exon	SYT6
NC_010446.5	106425670	106425722	NC_010446.5:106424510:106426511	CGI_shore
NC_010446.5	106425670	106425722	100152816	promoter	SYT6
NC_010446.5	106425670	106425722	NC_010446.5:106425526:106427309	CGI
NC_010446.5	111647876	111648008	106510205	intron
NC_010446.5	122100466	122100557	Target=A-rich:1-18;Class=Low_complexity	repeat
NC_010446.5	122100466	122100557	Target=Pre0_SS:1-260;Class=SINE/tRNA	repeat
NC_010446.5	122100466	122100557	110260376	intron
NC_010446.5	123314786	123314918	100155583	intron	ABCA4
NC_010446.5	123638204	123638376	100153143	utr5	BCAR3
NC_010446.5	123638204	123638376	100153143	exon	BCAR3
NC_010446.5	123638204	123638376	100153143	intron	BCAR3
NC_010446.5	125110300	125110468	NC_010446.5:125109312:125110933	CGI
NC_010446.5	125110300	125110468	397512	exon	TGFBR3
NC_010446.5	125110300	125110468	397512	utr5	TGFBR3
NC_010446.5	125110300	125110468	Target=(GCGCTGCG)n:1-51;Class=Simple_repeat	repeat
NC_010446.5	125110300	125110468	397512	intron	TGFBR3
NC_010446.5	125110629	125110767	NC_010446.5:125109312:125110933	CGI
NC_010446.5	125110629	125110767	397512	intron	TGFBR3
NC_010446.5	125269644	125269698	397512	intron	TGFBR3
NC_010446.5	125286444	125286557	397512	exon	TGFBR3
NC_010446.5	125286444	125286557	397512	intron	TGFBR3
NC_010446.5	125646791	125646892	NC_010446.5:125646028:125648029	CGI_shore
NC_010446.5	125646791	125646892	Target=MIRc:131-200;Class=SINE/MIR	repeat
NC_010446.5	126021527	126021623	NC_010446.5:126020607:126024437	CGI
NC_010446.5	127332651	127332705	100523668	intron	LOC100523668
NC_010446.5	127332651	127332705	100523668	promoter	LOC100523668
NC_010446.5	127802575	127802635	Target=Pre0_SS:1-260;Class=SINE/tRNA	repeat
NC_010446.5	128907395	128907448	NC_010446.5:128907177:128907744	CGI
NC_010446.5	128907395	128907448	100127155	exon	LMO4
NC_010446.5	129038443	129038590	NC_010446.5:129036722:129038723	CGI_shore
NC_010446.5	129038443	129038590	NC_010446.5:129037369:129039370	CGI_shore
NC_010446.5	129038443	129038590	Target=(CGACCCA)n:1-84;Class=Simple_repeat	repeat
NC_010446.5	129038443	129038590	Target=(CCCGAGC)n:1-58;Class=Simple_repeat	repeat
NC_010446.5	129078032	129078119	NC_010446.5:129076583:129078583	CGI_shore
NC_010446.5	129078032	129078119	Target=Pre0_SS:2-260;Class=SINE/tRNA	repeat
NC_010446.5	129078032	129078119	Target=Pre0_SS:1-258;Class=SINE/tRNA	repeat
NC_010446.5	129078032	129078119	110260394	intron
NC_010446.5	129802748	129802800	NC_010446.5:129802131:129802807	CGI
NC_010446.5	129802748	129802800	100513149	intron	ODF2L
NC_010446.5	130362022	130362195	100153815	intron	ZNHIT6
NC_010446.5	130485086	130485175	100153814	promoter	DDAH1
NC_010446.5	130485086	130485175	NC_010446.5:130485069:130486219	CGI
NC_010446.5	130485086	130485175	Target=(GCCGCTC)n:1-68;Class=Simple_repeat	repeat
NC_010447.5	430157	430215	NC_010447.5:429235:430430	CGI
NC_010447.5	430157	430215	574062	exon	MAPK12
NC_010447.5	430157	430215	574062	intron	MAPK12
NC_010447.5	430157	430215	Target=(CGCCCC)n:1-22;Class=Simple_repeat	repeat
NC_010447.5	430157	430215	Target=(C)n:1-38;Class=Simple_repeat	repeat
NC_010447.5	439101	439310	100518786	promoter	HDAC10
NC_010447.5	439101	439310	NC_010447.5:438724:440351	CGI
NC_010447.5	439101	439310	100518786	TSS	HDAC10
NC_010447.5	439101	439310	100518786	utr5	HDAC10
NC_010447.5	439101	439310	100518786	exon	HDAC10
NC_010447.5	1036142	1036196	NC_010447.5:1035784:1036218	CGI
NC_010447.5	1163716	1163796	NC_010447.5:1163317:1164458	CGI
NC_010447.5	1163716	1163796	NC_010447.5:1162657:1164658	CGI_shore
NC_010447.5	1163716	1163796	NC_010447.5:1162922:1164922	CGI_shore
NC_010447.5	1253351	1253525	NC_010447.5:1251403:1253403	CGI_shore
NC_010447.5	1253351	1253525	NC_010447.5:1251641:1253642	CGI_shore
NC_010447.5	1253351	1253525	NC_010447.5:1252721:1254721	CGI_shore
NC_010447.5	1253351	1253525	NC_010447.5:1253404:1254070	CGI
NC_010447.5	1253351	1253525	NC_010447.5:1253494:1255494	CGI_shore
NC_010447.5	1254681	1254812	NC_010447.5:1252721:1254721	CGI_shore
NC_010447.5	1254681	1254812	NC_010447.5:1253494:1255494	CGI_shore
NC_010447.5	1254681	1254812	NC_010447.5:1254070:1256071	CGI_shore
NC_010447.5	1254681	1254812	NC_010447.5:1254722:1254924	CGI
NC_010447.5	1437601	1437675	110260606	intron	FAM19A5
NC_010447.5	1547217	1547306	NC_010447.5:1546769:1548194	CGI
NC_010447.5	1547217	1547306	110260606	intron	FAM19A5
NC_010447.5	1548123	1548176	NC_010447.5:1546769:1548194	CGI
NC_010447.5	1548123	1548176	NC_010447.5:1548123:1550123	CGI_shore
NC_010447.5	1548123	1548176	110260606	intron	FAM19A5
NC_010447.5	1768889	1768940	Target=Pre0_SS:1-260;Class=SINE/tRNA	repeat
NC_010447.5	1861098	1861148	NC_010447.5:1860823:1862824	CGI_shore
NC_010447.5	3407041	3407197	NC_010447.5:3403471:3408009	CGI
NC_010447.5	3407041	3407197	110260611	exon	LOC110260611
NC_010447.5	3407041	3407197	110260611	intron	LOC110260611
NC_010447.5	3407041	3407197	NC_010447.5:3406895:3408895	CGI_shore
NC_010447.5	3854136	3854250	100519144	intron	FBLN1
NC_010447.5	3904111	3904172	100519144	intron	FBLN1
NC_010447.5	3921293	3921414	Target=MLT1C2:5-461;Class=LTR/ERVL-MaLR	repeat
NC_010447.5	3921293	3921414	100519144	intron	FBLN1
NC_010447.5	3927560	3927624	NC_010447.5:3926639:3927756	CGI
NC_010447.5	3927560	3927624	100519144	promoter	FBLN1
NC_010447.5	3927560	3927624	102160181	exon
NC_010447.5	3935066	3935148	Target=Pre0_SS:1-260;Class=SINE/tRNA	repeat
NC_010447.5	3935066	3935148	102160181	intron
NC_010447.5	4308967	4309109	NC_010447.5:4309044:4309280	CGI
NC_010447.5	4308967	4309109	NC_010447.5:4307043:4309043	CGI_shore
NC_010447.5	4308967	4309109	NC_010447.5:4308705:4310706	CGI_shore
NC_010447.5	4308967	4309109	100522673	intron	PHF21B
NC_010447.5	5323955	5324090	100524434	intron	EFCAB6
NC_010447.5	5323955	5324090	NC_010447.5:5323879:5325879	CGI_shore
NC_010447.5	5339585	5339701	100524434	intron	EFCAB6
NC_010447.5	5599322	5599472	110260618	exon
NC_010447.5	5599322	5599472	100524621	intron	SCUBE1
NC_010447.5	5642591	5642729	100524621	intron	SCUBE1
NC_010447.5	5652314	5652420	100524621	intron	SCUBE1
NC_010447.5	6654733	6654915	100157034	promoter	44442
NC_010447.5	6654733	6654915	NC_010447.5:6654369:6656370	CGI_shore
NC_010447.5	6654733	6654915	Target=Pre0_SS:1-258;Class=SINE/tRNA	repeat
NC_010447.5	6654733	6654915	100157034	intron	44442
NC_010447.5	6715774	6715887	NC_010447.5:6714251:6716251	CGI_shore
NC_010447.5	6715774	6715887	NC_010447.5:6715517:6716133	CGI
NC_010447.5	6715774	6715887	102163410	intron	SHISA8
NC_010447.5	7086313	7086380	110260627	promoter	TOB2
NC_010447.5	7086313	7086380	NC_010447.5:7085520:7087521	CGI_shore
NC_010447.5	7086313	7086380	110260629	intron
NC_010447.5	7086313	7086380	NC_010447.5:7086286:7087839	CGI
NC_010447.5	7432083	7432277	NC_010447.5:7431892:7432609	CGI
NC_010447.5	7432083	7432277	110260836	intron	LOC110260836
NC_010447.5	10160567	10160645	Target=Pre0_SS:1-259;Class=SINE/tRNA	repeat
NC_010447.5	11066677	11066747	100512654	promoter	CACNG2
NC_010447.5	11066677	11066747	NC_010447.5:11066612:11066844	CGI
NC_010447.5	11436353	11436505	Target=(TGGCCC)n:1-45;Class=Simple_repeat	repeat
NC_010447.5	11436353	11436505	NC_010447.5:11436476:11436767	CGI
NC_010447.5	11436353	11436505	NC_010447.5:11434475:11436475	CGI_shore
NC_010447.5	11436353	11436505	396904	intron	MYH9
NC_010447.5	11853806	11853887	Target=Pre0_SS:1-260;Class=SINE/tRNA	repeat
NC_010447.5	11853806	11853887	100513594	intron	RBFOX2
NC_010447.5	13758514	13758722	NC_010447.5:13756794:13758794	CGI_shore
NC_010447.5	13758514	13758722	NC_010447.5:13757435:13759435	CGI_shore
NC_010447.5	13758514	13758722	110260652	promoter	LOC110260652
NC_010447.5	13758514	13758722	100521450	promoter	RFX4
NC_010447.5	13758514	13758722	110260837	intron	LOC110260837
NC_010447.5	13758514	13758722	NC_010447.5:13757858:13759859	CGI_shore
NC_010447.5	13758514	13758722	100521450	exon	RFX4
NC_010447.5	13758514	13758722	100521450	utr5	RFX4
NC_010447.5	15260596	15260678	100127131	promoter	LOC100127131
NC_010447.5	15260596	15260678	NC_010447.5:15260465:15260895	CGI
NC_010447.5	15260596	15260678	100127131	intron	LOC100127131
NC_010447.5	15742362	15742481	NC_010447.5:15741698:15742570	CGI
NC_010447.5	15742362	15742481	100516908	exon	NCKAP5L
NC_010447.5	15742362	15742481	100516908	utr5	NCKAP5L
NC_010447.5	15742362	15742481	100516908	intron	NCKAP5L
NC_010447.5	16014725	16014821	100153250	exon	GPD1
NC_010447.5	16014725	16014821	NC_010447.5:16013833:16015833	CGI_shore
NC_010447.5	16014725	16014821	100153250	utr3	GPD1
NC_010447.5	16014725	16014821	NC_010447.5:16014247:16016247	CGI_shore
NC_010447.5	16014725	16014821	110260660	promoter	LOC110260660
NC_010447.5	17194032	17194103	Target=PRE1e:1-239;Class=SINE/tRNA	repeat
NC_010447.5	17194032	17194103	100522548	intron	FIGNL2
NC_010447.5	17434434	17434587	NC_010447.5:17434416:17434753	CGI
NC_010447.5	17555566	17555626	100626722	exon
NC_010447.5	17555566	17555626	NC_010447.5:17555484:17556249	CGI
NC_010447.5	17949204	17949254	733618	promoter	LOC733618
NC_010447.5	17949204	17949254	NC_010447.5:17949044:17951045	CGI_shore
NC_010447.5	19292186	19292500	102159203	intron
NC_010447.5	19292186	19292500	NC_010447.5:19292107:19292440	CGI
NC_010447.5	19292186	19292500	NC_010447.5:19292440:19294441	CGI_shore
NC_010447.5	19763080	19763142	NC_010447.5:19762988:19764989	CGI_shore
NC_010447.5	19763080	19763142	100621808	exon	PPP1R1A
NC_010447.5	19763080	19763142	Target=(GGC)n:1-74;Class=Simple_repeat	repeat
NC_010447.5	19763080	19763142	100621808	utr5	PPP1R1A
NC_010447.5	22094459	22094558	Target=Pre0_SS:1-248;Class=SINE/tRNA	repeat
NC_010447.5	22094459	22094558	100620470	intron	LOC100620470
NC_010447.5	22874949	22875151	100517400	promoter	ARHGEF25
NC_010447.5	22874949	22875151	NC_010447.5:22873717:22875676	CGI
NC_010447.5	22874949	22875151	100517400	intron	ARHGEF25
NC_010447.5	22874949	22875151	100517400	utr5	ARHGEF25
NC_010447.5	22874949	22875151	100517400	exon	ARHGEF25
NC_010447.5	22875330	22875428	NC_010447.5:22873717:22875676	CGI
NC_010447.5	22875330	22875428	100517400	intron	ARHGEF25
NC_010447.5	22875330	22875428	100517400	utr5	ARHGEF25
NC_010447.5	22875330	22875428	100517400	exon	ARHGEF25
NC_010447.5	22875330	22875428	Target=(C)n:1-36;Class=Simple_repeat	repeat
NC_010447.5	30453002	30453115	Target=MIR3:75-202;Class=SINE/MIR	repeat
NC_010447.5	34758821	34758913	NC_010447.5:34758636:34759176	CGI
NC_010447.5	34758821	34758913	100156181	exon	PTPRB
NC_010447.5	34758821	34758913	100156181	utr5	PTPRB
NC_010447.5	34758821	34758913	Target=(GCC)n:1-43;Class=Simple_repeat	repeat
NC_010447.5	34758821	34758913	100156181	intron	PTPRB
NC_010447.5	39915199	39915281	Target=SAT-1_SSc:1-28478;Class=Satellite	repeat
NC_010447.5	40099164	40099296	Target=SAT-1_SSc:1-158095;Class=Satellite	repeat
NC_010447.5	40131560	40131622	Target=SAT-1_SSc:1-158095;Class=Satellite	repeat
NC_010447.5	45239634	45239708	Target=Pre0_SS:3-259;Class=SINE/tRNA	repeat
NC_010447.5	45239634	45239708	100513281	intron	CCDC91
NC_010447.5	47609202	47609267	NC_010447.5:47608724:47609518	CGI
NC_010447.5	47609202	47609267	100515546	exon	SSPN
NC_010447.5	47609202	47609267	Target=(GGC)n:1-41;Class=Simple_repeat	repeat
NC_010447.5	47609202	47609267	100515546	utr5	SSPN
NC_010447.5	49456815	49456883	Target=Pre0_SS:1-260;Class=SINE/tRNA	repeat
NC_010447.5	49456815	49456883	100627965	intron	SOX5
NC_010447.5	52326426	52326500	Target=Pre0_SS:1-260;Class=SINE/tRNA	repeat
NC_010447.5	53509902	53509977	Target=Pre0_SS:1-243;Class=SINE/tRNA	repeat
NC_010447.5	60978227	60978441	NC_010447.5:60977765:60978655	CGI
NC_010447.5	60978227	60978441	Target=(GGC)n:1-32;Class=Simple_repeat	repeat
NC_010447.5	61104061	61104276	NC_010447.5:61103599:61104490	CGI
NC_010447.5	61104061	61104276	110260743	promoter
NC_010447.5	61104061	61104276	106507516	exon
NC_010447.5	61104061	61104276	Target=(GGC)n:1-32;Class=Simple_repeat	repeat
NC_010447.5	62715356	62715418	100152915	promoter	RIMKLB
NC_010447.5	62715356	62715418	NC_010447.5:62714288:62715960	CGI
NC_010447.5	63992444	63992553	100519150	promoter	PIANP
NC_010447.5	63992444	63992553	NC_010447.5:63992430:63993354	CGI
NC_010447.5	64182006	64182090	NC_010447.5:64181191:64182234	CGI
NC_010447.5	64182006	64182090	100519841	intron	VAMP1
NC_010447.5	64742182	64742248	100521792	intron	ANO2
NC_010447.5	65658094	65658166	100738346	exon	KCNA6
NC_010447.5	65658094	65658166	NC_010447.5:65656295:65658295	CGI_shore
NC_010447.5	65658094	65658166	106507533	promoter
NC_010447.5	65658094	65658166	Target=(TCC)n:1-25;Class=Simple_repeat	repeat
NC_010447.5	66948939	66949026	768114	intron	TSPAN9
NC_010447.5	67490854	67490966	NC_010447.5:67490648:67490918	CGI
NC_010447.5	67490854	67490966	100515547	exon	IQSEC3
NC_010447.5	67490854	67490966	NC_010447.5:67490918:67492919	CGI_shore
NC_010447.5	67490854	67490966	100515547	intron	IQSEC3
NC_010447.5	68627172	68627231	NC_010447.5:68626785:68628151	CGI
NC_010447.5	68627172	68627231	Target=(CCG)n:1-53;Class=Simple_repeat	repeat
NC_010447.5	68627172	68627231	100516268	exon	WNT5B
NC_010447.5	68627172	68627231	100516268	utr5	WNT5B
NC_010447.5	68627512	68627566	NC_010447.5:68626785:68628151	CGI
NC_010447.5	68627512	68627566	100516268	exon	WNT5B
NC_010447.5	68627512	68627566	100516268	utr5	WNT5B
NC_010447.5	68627512	68627566	100516268	intron	WNT5B
NC_010447.5	68818421	68818495	Target=Pre0_SS:1-260;Class=SINE/tRNA	repeat
NC_010447.5	68818421	68818495	100620898	intron	CACNA2D4
NC_010447.5	69437041	69437108	100518733	intron	CACNA1C
NC_010447.5	77077245	77077511	NC_010447.5:77075136:77077707	CGI
NC_010447.5	77077245	77077511	110260812	exon	LOC110260812
NC_010447.5	77077245	77077511	100154364	promoter	SLC38A1
NC_010447.5	78362898	78362961	110260776	exon
NC_010447.5	78362898	78362961	397323	exon	COL2A1
NC_010447.5	79594247	79594319	NC_010447.5:79593755:79594355	CGI
NC_010447.5	79594247	79594319	Target=G-rich:1-72;Class=Low_complexity	repeat
NC_010447.5	79594247	79594319	100519603	intron	SLC41A2
NC_010447.5	81111864	81111938	Target=Pre0_SS:1-260;Class=SINE/tRNA	repeat
NC_010447.5	82643287	82643362	Target=Pre0_SS:1-260;Class=SINE/tRNA	repeat
NC_010447.5	82643287	82643362	100523187	intron	MYBPC1
NC_010447.5	84080126	84080232	100513089	promoter	ANKS1B
NC_010447.5	84080126	84080232	NC_010447.5:84079861:84080768	CGI
NC_010447.5	85103269	85103387	Target=Pre0_SS:1-260;Class=SINE/tRNA	repeat
NC_010447.5	85103269	85103387	100513089	intron	ANKS1B
NC_010447.5	85279199	85279249	Target=Pre0_SS:1-260;Class=SINE/tRNA	repeat
NC_010447.5	87569779	87569910	NC_010447.5:87568937:87569981	CGI
NC_010447.5	87569779	87569910	100151804	promoter	AMDHD1
NC_010447.5	87569779	87569910	100157054	intron	CCDC38
NC_010447.5	87864785	87864847	NC_010447.5:87864128:87865086	CGI
NC_010447.5	87864785	87864847	Target=(GGC)n:1-55;Class=Simple_repeat	repeat
NC_010447.5	87864785	87864847	100516911	intron	USP44
NC_010447.5	88409394	88409448	NC_010447.5:88409180:88410376	CGI
NC_010447.5	88409394	88409448	100518487	promoter	TMCC3
NC_010447.5	88571133	88571213	Target=L2a:84-439;Class=LINE/L2	repeat
NC_010447.5	88571133	88571213	100518487	intron	TMCC3
NC_010447.5	88607315	88607467	NC_010447.5:88606889:88607979	CGI
NC_010447.5	88607315	88607467	Target=(GGCTGGC)n:1-59;Class=Simple_repeat	repeat
NC_010447.5	88607315	88607467	100518487	intron	TMCC3
NC_010447.5	89686107	89686181	100519842	intron	UBE2N
NC_010447.5	89686107	89686181	Target=Pre0_SS:1-260;Class=SINE/tRNA	repeat
NC_010447.5	92451356	92451415	Target=L1_SS:957-2124;Class=LINE/L1	repeat
NC_010447.5	101820414	101820499	102165008	exon
NC_010447.5	101820414	101820499	NC_010447.5:101819254:101821254	CGI_shore
NC_010447.5	101820414	101820499	NC_010447.5:101820214:101820476	CGI
NC_010447.5	101820414	101820499	NC_010447.5:101820476:101822477	CGI_shore
NC_010448.4	636750	636884	NC_010448.4:635450:637451	CGI_shore
NC_010448.4	636750	636884	100523671	exon	CDH15
NC_010448.4	636750	636884	100523671	intron	CDH15
NC_010448.4	805204	805276	NC_010448.4:804688:806689	CGI_shore
NC_010448.4	805204	805276	100525577	intron	CBFA2T3
NC_010448.4	909432	909619	NC_010448.4:907552:909552	CGI_shore
NC_010448.4	909432	909619	NC_010448.4:909553:909875	CGI
NC_010448.4	1144882	1144935	NC_010448.4:1143548:1144883	CGI
NC_010448.4	1144882	1144935	110260886	intron	ZFPM1
NC_010448.4	1144882	1144935	NC_010448.4:1144883:1146884	CGI_shore
NC_010448.4	1380070	1380127	NC_010448.4:1378952:1380952	CGI_shore
NC_010448.4	1380070	1380127	NC_010448.4:1379961:1381962	CGI_shore
NC_010448.4	1670328	1670469	NC_010448.4:1668715:1670716	CGI_shore
NC_010448.4	1670328	1670469	100511452	exon	KLHDC4
NC_010448.4	1670328	1670469	NC_010448.4:1669175:1671204	CGI
NC_010448.4	1769031	1769102	Target=Pre0_SS:1-248;Class=SINE/tRNA	repeat
NC_010448.4	1850575	1850630	NC_010448.4:1849069:1851141	CGI
NC_010448.4	1850575	1850630	100512105	exon	ZCCHC14
NC_010448.4	1850575	1850630	Target=(GCG)n:1-41;Class=Simple_repeat	repeat
NC_010448.4	1850575	1850630	100512105	intron	ZCCHC14
NC_010448.4	2590684	2590859	NC_010448.4:2589037:2591038	CGI_shore
NC_010448.4	2590684	2590859	NC_010448.4:2589490:2591490	CGI_shore
NC_010448.4	2590684	2590859	106510450	utr3	FOXF1
NC_010448.4	2590684	2590859	106510450	exon	FOXF1
NC_010448.4	2590684	2590859	100511815	exon	MTHFSD
NC_010448.4	2590684	2590859	100511815	utr3	MTHFSD
NC_010448.4	2618415	2618470	NC_010448.4:2617535:2619535	CGI_shore
NC_010448.4	2618415	2618470	NC_010448.4:2618159:2619141	CGI
NC_010448.4	2618415	2618470	Target=MLT1G1:7-97;Class=LTR/ERVL-MaLR	repeat
NC_010448.4	3017829	3017967	NC_010448.4:3017086:3019087	CGI_shore
NC_010448.4	3017829	3017967	NC_010448.4:3017579:3019579	CGI_shore
NC_010448.4	3017829	3017967	Target=MER90a:362-614;Class=LTR/ERV1	repeat
NC_010448.4	3152369	3152462	NC_010448.4:3151559:3152507	CGI
NC_010448.4	3181258	3181443	NC_010448.4:3180690:3182087	CGI
NC_010448.4	3181258	3181443	100513354	exon	C6H16orf74
NC_010448.4	3181258	3181443	100513354	utr5	C6H16orf74
NC_010448.4	3181258	3181443	Target=(CGCCGC)n:1-40;Class=Simple_repeat	repeat
NC_010448.4	3181258	3181443	100513354	intron	C6H16orf74
NC_010448.4	3181914	3182044	NC_010448.4:3180690:3182087	CGI
NC_010448.4	3181914	3182044	100513354	intron	C6H16orf74
NC_010448.4	3296651	3296747	NC_010448.4:3296304:3299707	CGI
NC_010448.4	3296651	3296747	100513153	intron	GSE1
NC_010448.4	3308282	3308404	NC_010448.4:3307021:3309021	CGI_shore
NC_010448.4	3308282	3308404	100513153	intron	GSE1
NC_010448.4	3481449	3481687	NC_010448.4:3480582:3482582	CGI_shore
NC_010448.4	3481449	3481687	Target=MIRc:55-159;Class=SINE/MIR	repeat
NC_010448.4	3481449	3481687	100513153	intron	GSE1
NC_010448.4	3548551	3548621	100513153	intron	GSE1
NC_010448.4	3562054	3562130	NC_010448.4:3560996:3562996	CGI_shore
NC_010448.4	3562054	3562130	NC_010448.4:3561832:3562299	CGI
NC_010448.4	3562054	3562130	100513153	intron	GSE1
NC_010448.4	3657750	3657803	NC_010448.4:3655139:3657919	CGI
NC_010448.4	3657750	3657803	110260895	promoter
NC_010448.4	3657750	3657803	NC_010448.4:3656129:3658129	CGI_shore
NC_010448.4	3657750	3657803	100513153	promoter	GSE1
NC_010448.4	4452047	4452175	100516196	intron	TAF1C
NC_010448.4	4452047	4452175	Target=MIR:2-139;Class=SINE/MIR	repeat
NC_010448.4	4452047	4452175	100516196	exon	TAF1C
NC_010448.4	4452047	4452175	100516196	utr5	TAF1C
NC_010448.4	6888487	6888706	110260908	exon
NC_010448.4	6888487	6888706	110260908	intron
NC_010448.4	6888487	6888706	Target=Eutr15:15-306;Class=DNA/hAT-Tip100?	repeat
NC_010448.4	9472638	9472780	Target=MLT1H2:1-292;Class=LTR/ERVL-MaLR	repeat
NC_010448.4	9472638	9472780	100518839	intron	WWOX
NC_010448.4	9909222	9909302	100519025	intron	CLEC3A
NC_010448.4	9909222	9909302	Target=PRE1_SS:84-258;Class=SINE/tRNA	repeat
NC_010448.4	11422778	11422831	100626866	intron	CNTNAP4
NC_010448.4	11437889	11437944	100626866	intron	CNTNAP4
NC_010448.4	12709161	12709228	100521092	intron	WDR59
NC_010448.4	12709161	12709228	Target=Pre0_SS:1-260;Class=SINE/tRNA	repeat
NC_010448.4	13951645	13951731	100513208	exon	HYDIN
NC_010448.4	13956907	13957009	100513208	intron	HYDIN
NC_010448.4	13956907	13957009	Target=PRE1d2:1-100;Class=SINE/tRNA	repeat
NC_010448.4	14569576	14569740	NC_010448.4:14567593:14569593	CGI_shore
NC_010448.4	14569576	14569740	NC_010448.4:14569594:14570007	CGI
NC_010448.4	15818518	15818590	Target=MIR:4-198;Class=SINE/MIR	repeat
NC_010448.4	15818518	15818590	100519194	intron	ZFHX3
NC_010448.4	17652823	17653101	NC_010448.4:17651971:17653242	CGI
NC_010448.4	17652823	17653101	100517402	exon	PDF
NC_010448.4	19013060	19013134	100135667	intron	NLRC5
NC_010448.4	19013060	19013134	Target=Pre0_SS:1-260;Class=SINE/tRNA	repeat
NC_010448.4	25788956	25789029	100525579	exon	CDH11
NC_010448.4	25934366	25934596	NC_010448.4:25932415:25934415	CGI_shore
NC_010448.4	25934366	25934596	106507571	promoter	LOC106507571
NC_010448.4	25934366	25934596	100525579	promoter	CDH11
NC_010448.4	25934366	25934596	NC_010448.4:25934416:25934741	CGI
NC_010448.4	25934366	25934596	NC_010448.4:25933898:25935899	CGI_shore
NC_010448.4	28587473	28587619	100621677	promoter	LOC100621677
NC_010448.4	28587473	28587619	NC_010448.4:28587124:28587726	CGI
NC_010448.4	28835922	28836138	110260947	exon	SLC7A6
NC_010448.4	28835922	28836138	110260947	utr5	SLC7A6
NC_010448.4	28835922	28836138	110260947	intron	SLC7A6
NC_010448.4	28835922	28836138	110260947	promoter	SLC7A6
NC_010448.4	28835922	28836138	NC_010448.4:28834503:28836503	CGI_shore
NC_010448.4	28835922	28836138	NC_010448.4:28835668:28836170	CGI
NC_010448.4	30508189	30508366	NC_010448.4:30506691:30508939	CGI
NC_010448.4	33730475	33730626	NC_010448.4:33728596:33730597	CGI_shore
NC_010448.4	33730475	33730626	100519899	promoter	SALL1
NC_010448.4	33730475	33730626	NC_010448.4:33729523:33734724	CGI
NC_010448.4	35213070	35213160	Target=MIR:44-250;Class=SINE/MIR	repeat
NC_010448.4	35213070	35213160	100520077	intron	ZNF423
NC_010448.4	35283305	35283422	Target=PRE1e:54-248;Class=SINE/tRNA	repeat
NC_010448.4	35283305	35283422	100520077	intron	ZNF423
NC_010448.4	35419474	35419552	Target=PRE1g:47-251;Class=SINE/tRNA	repeat
NC_010448.4	35419474	35419552	Target=MIRb:180-259;Class=SINE/MIR	repeat
NC_010448.4	35734851	35734925	Target=Pre0_SS:2-260;Class=SINE/tRNA	repeat
NC_010448.4	37443471	37443643	100626670	promoter	NETO2
NC_010448.4	37443471	37443643	NC_010448.4:37442940:37444502	CGI
NC_010448.4	37443471	37443643	Target=(GCGG)n:1-92;Class=Simple_repeat	repeat
NC_010448.4	37443471	37443643	Target=(CGGCG)n:1-56;Class=Simple_repeat	repeat
NC_010448.4	37443471	37443643	100626670	TSS	NETO2
NC_010448.4	37443471	37443643	100626670	utr5	NETO2
NC_010448.4	37443471	37443643	100626670	exon	NETO2
NC_010448.4	42274329	42274453	110261352	exon	LOC110261352
NC_010448.4	42274329	42274453	NC_010448.4:42274026:42274646	CGI
NC_010448.4	42274329	42274453	100524681	exon	ZNF507
NC_010448.4	42274329	42274453	100524681	utr5	ZNF507
NC_010448.4	42274329	42274453	100524681	intron	ZNF507
NC_010448.4	42815919	42816011	100620768	promoter	CEP89
NC_010448.4	42815919	42816011	100621643	exon	FAAP24
NC_010448.4	42815919	42816011	100621643	intron	FAAP24
NC_010448.4	42988013	42988233	100524868	promoter	LRP3
NC_010448.4	42988013	42988233	NC_010448.4:42987793:42989153	CGI
NC_010448.4	42988013	42988233	Target=(CGCC)n:1-43;Class=Simple_repeat	repeat
NC_010448.4	43529802	43529873	NC_010448.4:43527098:43530021	CGI
NC_010448.4	43529802	43529873	110260977	promoter	KCTD15
NC_010448.4	43529802	43529873	110260977	intron	KCTD15
NC_010448.4	43529802	43529873	110260977	exon	KCTD15
NC_010448.4	43529802	43529873	110260977	utr5	KCTD15
NC_010448.4	44438907	44439048	Target=(GGGT)n:1-22;Class=Simple_repeat	repeat
NC_010448.4	45988125	45988214	Target=LTR39A2_SSc:1-39;Class=LTR/ERV1	repeat
NC_010448.4	45988125	45988214	102162711	intron	ZFP14
NC_010448.4	47224663	47224713	102167359	promoter
NC_010448.4	47224663	47224713	100514844	exon	YIF1B
NC_010448.4	47224663	47224713	NC_010448.4:47224566:47226567	CGI_shore
NC_010448.4	47224663	47224713	Target=(GCCACG)n:1-82;Class=Simple_repeat	repeat
NC_010448.4	47422333	47422417	396718	intron	RYR1
NC_010448.4	47422333	47422417	Target=L2a:3084-3201;Class=LINE/L2	repeat
NC_010448.4	47442712	47442778	396718	exon	RYR1
NC_010448.4	47442712	47442778	NC_010448.4:47442662:47443179	CGI
NC_010448.4	47442712	47442778	Target=MamSINE1:20-68;Class=SINE/tRNA-RTE	repeat
NC_010448.4	47731160	47731289	102162472	intron
NC_010448.4	47731160	47731289	NC_010448.4:47731144:47731606	CGI
NC_010448.4	47731160	47731289	102162472	exon
NC_010448.4	47901620	47901711	100627936	intron	PAK4
NC_010448.4	49346536	49346697	397078	intron	TGFB1
NC_010448.4	49346536	49346697	Target=G-rich:1-31;Class=Low_complexity	repeat
NC_010448.4	49346536	49346697	NC_010448.4:49346321:49349354	CGI
NC_010448.4	49619832	49619990	100513862	promoter	MEGF8
NC_010448.4	49619832	49619990	NC_010448.4:49619317:49621318	CGI_shore
NC_010448.4	49619832	49619990	100513091	exon	TMEM145
NC_010448.4	49619832	49619990	100513091	utr3	TMEM145
NC_010448.4	49619832	49619990	NC_010448.4:49619780:49620975	CGI
NC_010448.4	49619832	49619990	100513091	intron	TMEM145
NC_010448.4	49620091	49620151	100513862	promoter	MEGF8
NC_010448.4	49620091	49620151	NC_010448.4:49619317:49621318	CGI_shore
NC_010448.4	49620091	49620151	100513091	exon	TMEM145
NC_010448.4	49620091	49620151	100513091	utr3	TMEM145
NC_010448.4	49620091	49620151	NC_010448.4:49619780:49620975	CGI
NC_010448.4	49620091	49620151	100513091	intron	TMEM145
NC_010448.4	50549178	50549275	NC_010448.4:50548317:50550318	CGI_shore
NC_010448.4	50549178	50549275	NC_010448.4:50548930:50549432	CGI
NC_010448.4	51253756	51253821	NC_010448.4:51252569:51254569	CGI_shore
NC_010448.4	51613296	51613370	NC_010448.4:51612694:51614695	CGI_shore
NC_010448.4	51613296	51613370	110261008	intron	LOC110261008
NC_010448.4	51641931	51642006	NC_010448.4:51641513:51642021	CGI
NC_010448.4	51641931	51642006	102167043	intron	EXOC3L2
NC_010448.4	51641931	51642006	NC_010448.4:51640781:51642782	CGI_shore
NC_010448.4	51816840	51816923	NC_010448.4:51816171:51818171	CGI_shore
NC_010448.4	51816840	51816923	Target=MLT1K:147-530;Class=LTR/ERVL-MaLR	repeat
NC_010448.4	51816840	51816923	Target=(CA)n:1-45;Class=Simple_repeat	repeat
NC_010448.4	51816840	51816923	Target=MLT1K:79-146;Class=LTR/ERVL-MaLR	repeat
NC_010448.4	52128162	52128315	NC_010448.4:52127853:52128354	CGI
NC_010448.4	52128162	52128315	102158590	exon	RSPH6A
NC_010448.4	52418825	52418882	Target=Pre0_SS:1-259;Class=SINE/tRNA	repeat
NC_010448.4	52475438	52475504	100513356	utr5	CCDC8
NC_010448.4	52475438	52475504	NC_010448.4:52475105:52475868	CGI
NC_010448.4	52475438	52475504	100513356	exon	CCDC8
NC_010448.4	52870873	52871010	100517221	intron	NPAS1
NC_010448.4	52870873	52871010	100517221	exon	NPAS1
NC_010448.4	52870873	52871010	NC_010448.4:52870781:52871205	CGI
NC_010448.4	52892807	52892881	Target=Pre0_SS:1-256;Class=SINE/tRNA	repeat
NC_010448.4	53225443	53225494	100519030	exon	SLC8A2
NC_010448.4	53225443	53225494	NC_010448.4:53224809:53225569	CGI
NC_010448.4	53225443	53225494	100519030	intron	SLC8A2
NC_010448.4	53427088	53427312	NC_010448.4:53426035:53428036	CGI_shore
NC_010448.4	53427088	53427312	NC_010448.4:53427065:53427778	CGI
NC_010448.4	53427088	53427312	100624668	intron	EHD2
NC_010448.4	53763789	53763899	NC_010448.4:53761803:53763804	CGI_shore
NC_010448.4	53763789	53763899	NC_010448.4:53762453:53764453	CGI_shore
NC_010448.4	53763789	53763899	100622947	utr3	TMEM143
NC_010448.4	53763789	53763899	100622947	exon	TMEM143
NC_010448.4	53981248	53981351	100738292	promoter	SPHK2
NC_010448.4	53981248	53981351	NC_010448.4:53981049:53983049	CGI_shore
NC_010448.4	53981248	53981351	NC_010448.4:53981100:53981434	CGI
NC_010448.4	53991045	53991095	NC_010448.4:53990272:53992272	CGI_shore
NC_010448.4	53991045	53991095	NC_010448.4:53990755:53992755	CGI_shore
NC_010448.4	53991045	53991095	NC_010448.4:53990911:53991282	CGI
NC_010448.4	53991045	53991095	100524747	exon	DBP
NC_010448.4	53991209	53991281	NC_010448.4:53990272:53992272	CGI_shore
NC_010448.4	53991209	53991281	NC_010448.4:53990755:53992755	CGI_shore
NC_010448.4	53991209	53991281	NC_010448.4:53990911:53991282	CGI
NC_010448.4	53991209	53991281	100524747	exon	DBP
NC_010448.4	53998098	53998227	445526	intron	CA11
NC_010448.4	53998098	53998227	110261016	intron
NC_010448.4	54022077	54022164	100524201	exon	FUT2A
NC_010448.4	54022077	54022164	NC_010448.4:54021756:54023757	CGI_shore
NC_010448.4	54022077	54022164	100524201	utr3	FUT2A
NC_010448.4	54071017	54071103	NC_010448.4:54070377:54071366	CGI
NC_010448.4	54071017	54071103	100523674	exon	RASIP1
NC_010448.4	54071017	54071103	NC_010448.4:54070910:54072910	CGI_shore
NC_010448.4	54081463	54081726	397138	promoter	FUT1
NC_010448.4	54081463	54081726	100302504	promoter	FGF21
NC_010448.4	54081463	54081726	NC_010448.4:54081394:54083395	CGI_shore
NC_010448.4	54081463	54081726	110261360	intron	LOC110261360
NC_010448.4	54081463	54081726	Target=PRE1e:1-241;Class=SINE/tRNA	repeat
NC_010448.4	54081463	54081726	110261360	exon	LOC110261360
NC_010448.4	54081463	54081726	110261360	TSS	LOC110261360
NC_010448.4	54081463	54081726	Target=(CCAGACC)n:1-43;Class=Simple_repeat	repeat
NC_010448.4	54081463	54081726	110261360	promoter	LOC110261360
NC_010448.4	54335737	54335899	NC_010448.4:54334850:54336850	CGI_shore
NC_010448.4	54335737	54335899	100511995	intron	PPFIA3
NC_010448.4	54335737	54335899	NC_010448.4:54335736:54335951	CGI
NC_010448.4	54335737	54335899	100511995	exon	PPFIA3
NC_010448.4	54601847	54601938	NC_010448.4:54599861:54601862	CGI_shore
NC_010448.4	54601847	54601938	100518493	intron	RCN3
NC_010448.4	54601847	54601938	NC_010448.4:54601535:54602403	CGI
NC_010448.4	54601847	54601938	NC_010448.4:54601768:54603768	CGI_shore
NC_010448.4	54602314	54602397	NC_010448.4:54601535:54602403	CGI
NC_010448.4	54602314	54602397	NC_010448.4:54601768:54603768	CGI_shore
NC_010448.4	54602314	54602397	100518493	exon	RCN3
NC_010448.4	54602314	54602397	100518493	intron	RCN3
NC_010448.4	54693499	54693680	100521729	intron	SCAF1
NC_010448.4	54693499	54693680	NC_010448.4:54692063:54694063	CGI_shore
NC_010448.4	54693499	54693680	100521729	exon	SCAF1
NC_010448.4	55010513	55010614	100524202	promoter	ZNF473
NC_010448.4	55010513	55010614	100523004	promoter	VRK3
NC_010448.4	55010513	55010614	NC_010448.4:55009573:55010818	CGI
NC_010448.4	55010513	55010614	100524202	exon	ZNF473
NC_010448.4	55010513	55010614	100524202	utr5	ZNF473
NC_010448.4	55010513	55010614	100523004	exon	VRK3
NC_010448.4	55010513	55010614	100523004	utr5	VRK3
NC_010448.4	55387537	55387652	NC_010448.4:55386656:55388656	CGI_shore
NC_010448.4	55387537	55387652	NC_010448.4:55387233:55389234	CGI_shore
NC_010448.4	55387537	55387652	106510573	intron	LRRC4B
NC_010448.4	55484943	55485080	100512353	intron	SHANK1
NC_010448.4	55484943	55485080	100512353	exon	SHANK1
NC_010448.4	55665643	55665756	110261028	exon	KLK9
NC_010448.4	55910760	55910867	Target=Pre0_SS:1-258;Class=SINE/tRNA	repeat
NC_010448.4	56150640	56150838	100519779	exon	CACNG6
NC_010448.4	56150640	56150838	100519779	utr5	CACNG6
NC_010448.4	56150640	56150838	100519779	intron	CACNG6
NC_010448.4	56150640	56150838	NC_010448.4:56149839:56151840	CGI_shore
NC_010448.4	56150640	56150838	NC_010448.4:56150569:56151055	CGI
NC_010448.4	56150640	56150838	100519779	promoter	CACNG6
NC_010448.4	57106854	57106933	102158906	intron	LOC102158906
NC_010448.4	57106854	57106933	NC_010448.4:57106625:57107247	CGI
NC_010448.4	57106854	57106933	102158906	exon	LOC102158906
NC_010448.4	57106854	57106933	Target=(GCGGG)n:1-32;Class=Simple_repeat	repeat
NC_010448.4	57668149	57670012	106507707	exon
NC_010448.4	57668149	57670012	106507707	intron
NC_010448.4	57668149	57670012	Target=SINE1A_SS:62-93;Class=SINE/tRNA	repeat
NC_010448.4	57668149	57670012	Target=HAL1_SS:2859-3015;Class=LINE/L1	repeat
NC_010448.4	58876293	58876359	100524682	exon	TTYH1
NC_010448.4	58876293	58876359	100524682	intron	TTYH1
NC_010448.4	59316522	59316580	NC_010448.4:59313979:59317055	CGI
NC_010448.4	59316522	59316580	110261051	promoter
NC_010448.4	59316522	59316580	100627336	intron	EPS8L1
NC_010448.4	60759454	60759591	NC_010448.4:60758737:60759740	CGI
NC_010448.4	60759454	60759591	110261070	promoter	LOC110261070
NC_010448.4	60759454	60759591	100623035	exon	LOC100623035
NC_010448.4	60759454	60759591	100623035	utr5	LOC100623035
NC_010448.4	62432885	62432963	Target=Pre0_SS:1-260;Class=SINE/tRNA	repeat
NC_010448.4	62719305	62719357	NC_010448.4:62718915:62720246	CGI
NC_010448.4	62719305	62719357	102158443	exon	LOC102158443
NC_010448.4	62719305	62719357	102158443	utr5	LOC102158443
NC_010448.4	62719305	62719357	102158443	intron	LOC102158443
NC_010448.4	62719305	62719357	102158443	promoter	LOC102158443
NC_010448.4	63104644	63104742	100622139	intron	CHMP2A
NC_010448.4	63104644	63104742	NC_010448.4:63104369:63105135	CGI
NC_010448.4	63288990	63289097	102163932	promoter	SAMD11
NC_010448.4	63288990	63289097	NC_010448.4:63287228:63289689	CGI
NC_010448.4	63288990	63289097	102163932	intron	SAMD11
NC_010448.4	63305480	63305553	NC_010448.4:63303572:63305572	CGI_shore
NC_010448.4	63305480	63305553	NC_010448.4:63303933:63305934	CGI_shore
NC_010448.4	63305480	63305553	102163932	intron	SAMD11
NC_010448.4	63305480	63305553	Target=(CCG)n:1-51;Class=Simple_repeat	repeat
NC_010448.4	63305480	63305553	Target=(GGC)n:1-49;Class=Simple_repeat	repeat
NC_010448.4	63765502	63765768	NC_010448.4:63764227:63766004	CGI
NC_010448.4	63765502	63765768	Target=(GGC)n:1-43;Class=Simple_repeat	repeat
NC_010448.4	63765502	63765768	100511201	promoter	FNDC10
NC_010448.4	64172786	64172953	NC_010448.4:64171273:64173274	CGI_shore
NC_010448.4	64172786	64172953	110261079	intron	LOC110261079
NC_010448.4	64172786	64172953	NC_010448.4:64172684:64173108	CGI
NC_010448.4	64189305	64189394	Target=(GCG)n:1-82;Class=Simple_repeat	repeat
NC_010448.4	64189305	64189394	NC_010448.4:64186657:64195491	CGI
NC_010448.4	64189305	64189394	110261080	intron	SKI
NC_010448.4	64342509	64342617	Target=MIRb:9-162;Class=SINE/MIR	repeat
NC_010448.4	64342509	64342617	100623940	intron	PLCH2
NC_010448.4	64416019	64416076	Target=Pre0_SS:3-240;Class=SINE/tRNA	repeat
NC_010448.4	65092691	65092789	NC_010448.4:65090715:65092716	CGI_shore
NC_010448.4	65092691	65092789	NC_010448.4:65092690:65092948	CGI
NC_010448.4	65092691	65092789	102165253	intron	MEGF6
NC_010448.4	65096589	65096671	102165253	intron	MEGF6
NC_010448.4	65212270	65212402	102165390	intron	TP73
NC_010448.4	65289401	65289493	106510608	intron	CEP104
NC_010448.4	65289401	65289493	NC_010448.4:65289388:65289653	CGI
NC_010448.4	65289401	65289493	106510608	exon	CEP104
NC_010448.4	65289401	65289493	NC_010448.4:65288903:65290903	CGI_shore
NC_010448.4	65289401	65289493	NC_010448.4:65288983:65290984	CGI_shore
NC_010448.4	66834413	66834547	NC_010448.4:66832432:66834432	CGI_shore
NC_010448.4	66834413	66834547	102166225	exon
NC_010448.4	66834413	66834547	NC_010448.4:66834433:66834645	CGI
NC_010448.4	66834413	66834547	102166225	intron
NC_010448.4	66953747	66953888	100514966	exon	KCNAB2
NC_010448.4	66953747	66953888	100514966	utr5	KCNAB2
NC_010448.4	66953747	66953888	100514966	intron	KCNAB2
NC_010448.4	66963944	66964053	100514966	utr5	KCNAB2
NC_010448.4	66963944	66964053	100514966	exon	KCNAB2
NC_010448.4	66963944	66964053	100514966	intron	KCNAB2
NC_010448.4	67342708	67342822	100516377	promoter	PLEKHG5
NC_010448.4	67342708	67342822	NC_010448.4:67342168:67344169	CGI_shore
NC_010448.4	67342708	67342822	NC_010448.4:67342461:67342834	CGI
NC_010448.4	67342708	67342822	100516377	intron	PLEKHG5
NC_010448.4	67433396	67433526	106507613	promoter
NC_010448.4	67433396	67433526	NC_010448.4:67433294:67435163	CGI
NC_010448.4	67433396	67433526	106504088	exon	KLHL21
NC_010448.4	67720898	67720951	NC_010448.4:67720831:67722832	CGI_shore
NC_010448.4	67720898	67720951	102160515	intron	CAMTA1
NC_010448.4	67759463	67759554	NC_010448.4:67757928:67759928	CGI_shore
NC_010448.4	67759463	67759554	102160515	intron	CAMTA1
NC_010448.4	67859272	67859383	102160515	intron	CAMTA1
NC_010448.4	67942044	67942118	Target=Pre0_SS:2-260;Class=SINE/tRNA	repeat
NC_010448.4	67942044	67942118	102160515	intron	CAMTA1
NC_010448.4	67963432	67963492	102160515	intron	CAMTA1
NC_010448.4	68116475	68116606	Target=L3:3868-3989;Class=LINE/CR1	repeat
NC_010448.4	68116475	68116606	102160515	intron	CAMTA1
NC_010448.4	68168581	68168654	102160515	intron	CAMTA1
NC_010448.4	68216154	68216273	102160515	intron	CAMTA1
NC_010448.4	68267652	68267799	Target=ERV1N-1_SSc-LTR:13-349;Class=LTR/ERV1	repeat
NC_010448.4	68267652	68267799	Target=Pre0_SS:1-260;Class=SINE/tRNA	repeat
NC_010448.4	68267652	68267799	102160515	intron	CAMTA1
NC_010448.4	69135914	69136043	Target=ALTR2_SSc:73-272;Class=LTR/ERV1	repeat
NC_010448.4	69135914	69136043	100738753	intron	RERE
NC_010448.4	69983448	69983510	100517949	exon	TMEM201
NC_010448.4	69983448	69983510	NC_010448.4:69983265:69983617	CGI
NC_010448.4	70883088	70883163	100510911	intron	CASZ1
NC_010448.4	70883088	70883163	NC_010448.4:70881554:70883554	CGI_shore
NC_010448.4	70883088	70883163	Target=(AGG)n:1-32;Class=Simple_repeat	repeat
NC_010448.4	70911664	70911728	NC_010448.4:70910070:70912070	CGI_shore
NC_010448.4	70911664	70911728	Target=(CGCC)n:1-47;Class=Simple_repeat	repeat
NC_010448.4	70911664	70911728	Target=(CCGCCCT)n:1-37;Class=Simple_repeat	repeat
NC_010448.4	70911664	70911728	100510911	intron	CASZ1
NC_010448.4	71434460	71434552	Target=Pre0_SS:1-245;Class=SINE/tRNA	repeat
NC_010448.4	72480224	72480288	NC_010448.4:72479056:72481057	CGI_shore
NC_010448.4	72480224	72480288	100514237	intron	VPS13D
NC_010448.4	74236667	74236717	NC_010448.4:74236274:74237206	CGI
NC_010448.4	74236667	74236717	100520199	exon	KAZN
NC_010448.4	74236667	74236717	100520199	intron	KAZN
NC_010448.4	74320067	74320168	100520199	intron	KAZN
NC_010448.4	74336389	74336458	Target=MIR3:45-176;Class=SINE/MIR	repeat
NC_010448.4	74336389	74336458	100520199	intron	KAZN
NC_010448.4	75457272	75457336	100522143	intron
NC_010448.4	75457272	75457336	NC_010448.4:75457111:75459111	CGI_shore
NC_010448.4	75457272	75457336	100523067	promoter	SZRD1
NC_010448.4	76943556	76943645	100622521	intron	IGSF21
NC_010448.4	77608323	77608471	102161705	exon	UBR4
NC_010448.4	77608323	77608471	102161705	intron	UBR4
NC_010448.4	78060489	78060545	100623582	intron	NBL1
NC_010448.4	78060489	78060545	NC_010448.4:78060060:78062061	CGI_shore
NC_010448.4	78060489	78060545	100623582	utr5	NBL1
NC_010448.4	78060489	78060545	100623582	exon	NBL1
NC_010448.4	78731916	78731980	100515264	intron	CAMK2N1
NC_010448.4	78731916	78731980	NC_010448.4:78731680:78735111	CGI
NC_010448.4	78732089	78732145	100515264	intron	CAMK2N1
NC_010448.4	78732089	78732145	NC_010448.4:78731680:78735111	CGI
NC_010448.4	83382083	83382139	NC_010448.4:83381970:83382544	CGI
NC_010448.4	85865172	85865252	100515614	promoter	EPB41
NC_010448.4	85865172	85865252	NC_010448.4:85864959:85865798	CGI
NC_010448.4	85865172	85865252	100515614	exon	EPB41
NC_010448.4	85865172	85865252	100515614	utr5	EPB41
NC_010448.4	85865172	85865252	Target=G-rich:1-42;Class=Low_complexity	repeat
NC_010448.4	85865172	85865252	100515614	intron	EPB41
NC_010448.4	86034044	86034288	100515438	promoter	TMEM200B
NC_010448.4	86034044	86034288	NC_010448.4:86030681:86034945	CGI
NC_010448.4	87527084	87527179	100516859	intron	SDC3
NC_010448.4	87825249	87825516	NC_010448.4:87825080:87825809	CGI
NC_010448.4	87825249	87825516	Target=(CACCG)n:1-55;Class=Simple_repeat	repeat
NC_010448.4	87825249	87825516	100516496	exon	NKAIN1
NC_010448.4	87825249	87825516	100516496	utr5	NKAIN1
NC_010448.4	87825249	87825516	100516496	intron	NKAIN1
NC_010448.4	89069071	89069300	NC_010448.4:89067824:89069824	CGI_shore
NC_010448.4	89069071	89069300	NC_010448.4:89068818:89069249	CGI
NC_010448.4	89069071	89069300	NC_010448.4:89069249:89071250	CGI_shore
NC_010448.4	89069071	89069300	Target=(GCC)n:1-33;Class=Simple_repeat	repeat
NC_010448.4	89069071	89069300	100621029	intron	KIAA1522
NC_010448.4	90099214	90099304	100736699	intron	CSMD2
NC_010448.4	92443431	92443528	100625215	exon	STK40
NC_010448.4	92443431	92443528	NC_010448.4:92443221:92443529	CGI
NC_010448.4	92443431	92443528	100625215	intron	STK40
NC_010448.4	93803766	93803830	110261151	exon	EPHA10
NC_010448.4	93803766	93803830	NC_010448.4:93803755:93804006	CGI
NC_010448.4	93803913	93803963	110261151	exon	EPHA10
NC_010448.4	93803913	93803963	NC_010448.4:93803755:93804006	CGI
NC_010448.4	95321448	95321601	100515668	promoter	BMP8A
NC_010448.4	95321448	95321601	NC_010448.4:95321439:95322907	CGI
NC_010448.4	95580715	95580895	100620374	intron	BMP8B
NC_010448.4	95580715	95580895	NC_010448.4:95580230:95580996	CGI
NC_010448.4	99430725	99430797	100624854	intron	PTPRM
NC_010448.4	99430725	99430797	Target=L2a:2538-2884;Class=LINE/L2	repeat
NC_010448.4	100854636	100854719	NC_010448.4:100853824:100854720	CGI
NC_010448.4	100854636	100854719	102161632	promoter
NC_010448.4	100854636	100854719	102165197	intron
NC_010448.4	103735169	103735512	100522875	exon	EMILIN2
NC_010448.4	103735169	103735512	NC_010448.4:103735168:103735542	CGI
NC_010448.4	103786625	103786825	NC_010448.4:103785756:103787359	CGI
NC_010448.4	103786625	103786825	100522875	exon	EMILIN2
NC_010448.4	103786625	103786825	100522875	utr5	EMILIN2
NC_010448.4	103787130	103787231	NC_010448.4:103785756:103787359	CGI
NC_010448.4	103787130	103787231	100522875	promoter	EMILIN2
NC_010448.4	109235660	109235728	NC_010448.4:109235345:109235997	CGI
NC_010448.4	109235660	109235728	497635	utr5	IMPACT
NC_010448.4	109235660	109235728	497635	exon	IMPACT
NC_010448.4	109235660	109235728	Target=(CCCGCGC)n:1-54;Class=Simple_repeat	repeat
NC_010448.4	109235660	109235728	100511459	intron	OSBPL1A
NC_010448.4	110122240	110122434	NC_010448.4:110122171:110123062	CGI
NC_010448.4	110122240	110122434	100739769	intron	ZNF521
NC_010448.4	110122956	110123028	NC_010448.4:110122171:110123062	CGI
NC_010448.4	110122956	110123028	100739769	promoter	ZNF521
NC_010448.4	111149454	111149671	100514526	intron	KCTD1
NC_010448.4	111149454	111149671	NC_010448.4:111146191:111150565	CGI
NC_010448.4	111149454	111149671	100514526	promoter	KCTD1
NC_010448.4	111149454	111149671	100514526	exon	KCTD1
NC_010448.4	111149454	111149671	100514526	utr5	KCTD1
NC_010448.4	111272840	111272971	Target=Pre0_SS:1-260;Class=SINE/tRNA	repeat
NC_010448.4	112628841	112628992	NC_010448.4:112626524:112629611	CGI
NC_010448.4	112628841	112628992	100515322	exon	CDH2
NC_010448.4	112628841	112628992	100515322	utr5	CDH2
NC_010448.4	112628841	112628992	110261188	intron
NC_010448.4	115412349	115412423	Target=Pre0_SS:1-260;Class=SINE/tRNA	repeat
NC_010448.4	115412349	115412423	100625833	intron	DSG2
NC_010448.4	116609775	116609947	110261190	promoter
NC_010448.4	116609775	116609947	100518133	exon	KLHL14
NC_010448.4	116609775	116609947	NC_010448.4:116609774:116611392	CGI
NC_010448.4	119734983	119735144	Target=Pre0_SS:1-260;Class=SINE/tRNA	repeat
NC_010448.4	119734983	119735144	NC_010448.4:119733311:119735311	CGI_shore
NC_010448.4	119734983	119735144	100621141	promoter	C6H18orf21
NC_010448.4	121077154	121077274	NC_010448.4:121076568:121077655	CGI
NC_010448.4	121077154	121077274	100521138	intron	CELF4
NC_010448.4	121077154	121077274	Target=(GGCGC)n:1-40;Class=Simple_repeat	repeat
NC_010448.4	121077154	121077274	110261198	intron
NC_010448.4	133198089	133198157	Target=Pre0_SS:1-250;Class=SINE/tRNA	repeat
NC_010448.4	137464429	137464503	Target=Pre0_SS:1-258;Class=SINE/tRNA	repeat
NC_010448.4	137464429	137464503	100627191	intron	MSH4
NC_010448.4	139021161	139021222	NC_010448.4:139021079:139021628	CGI
NC_010448.4	139021161	139021222	733655	intron	LRRIQ3
NC_010448.4	145674186	145674273	NC_010448.4:145673985:145674943	CGI
NC_010448.4	145674186	145674273	100621902	intron	MIER1
NC_010448.4	145674525	145674718	NC_010448.4:145673985:145674943	CGI
NC_010448.4	145674525	145674718	100621902	exon	MIER1
NC_010448.4	145674525	145674718	100621902	utr5	MIER1
NC_010448.4	145674525	145674718	100621902	promoter	MIER1
NC_010448.4	145674525	145674718	Target=(GC)n:1-35;Class=Simple_repeat	repeat
NC_010448.4	145674525	145674718	100621902	intron	MIER1
NC_010448.4	151094104	151094183	100523676	intron	NFIA
NC_010448.4	152321614	152321840	NC_010448.4:152319679:152321679	CGI_shore
NC_010448.4	152321614	152321840	110261221	promoter	LOC110261221
NC_010448.4	152321614	152321840	110261221	TSS	LOC110261221
NC_010448.4	152321614	152321840	110261221	utr5	LOC110261221
NC_010448.4	152321614	152321840	NC_010448.4:152321680:152322124	CGI
NC_010448.4	152321614	152321840	110261221	exon	LOC110261221
NC_010448.4	153860004	153860074	NC_010448.4:153859444:153860669	CGI
NC_010448.4	153860004	153860074	100510966	exon	TACSTD2
NC_010448.4	153860437	153860496	NC_010448.4:153859444:153860669	CGI
NC_010448.4	153860437	153860496	100510966	exon	TACSTD2
NC_010448.4	157813003	157813068	NC_010448.4:157812652:157813156	CGI
NC_010448.4	157813003	157813068	110261225	exon	ACOT11
NC_010448.4	157813003	157813068	110261225	utr5	ACOT11
NC_010448.4	157813003	157813068	110261225	intron	ACOT11
NC_010448.4	161616835	161617031	NC_010448.4:161614842:161617460	CGI
NC_010448.4	161616835	161617031	100515384	promoter	DMRTA2
NC_010448.4	161616835	161617031	100515384	exon	DMRTA2
NC_010448.4	161616835	161617031	100515384	utr5	DMRTA2
NC_010448.4	161616835	161617031	NC_010448.4:161616669:161618669	CGI_shore
NC_010448.4	161616835	161617031	100515384	intron	DMRTA2
NC_010448.4	163444937	163445049	100522082	intron	SLC5A9
NC_010448.4	163545039	163545158	100522082	intron	SLC5A9
NC_010448.4	163623247	163623366	100626346	promoter	TRABD2B
NC_010448.4	163623247	163623366	NC_010448.4:163622863:163624453	CGI
NC_010448.4	163623247	163623366	Target=(CG)n:1-18;Class=Simple_repeat	repeat
NC_010448.4	163623247	163623366	Target=(GT)n:1-17;Class=Simple_repeat	repeat
NC_010448.4	163623247	163623366	Target=(GAGC)n:1-41;Class=Simple_repeat	repeat
NC_010448.4	163779806	163779889	NC_010448.4:163779734:163781734	CGI_shore
NC_010448.4	163779806	163779889	Target=MIRc:115-180;Class=SINE/MIR	repeat
NC_010448.4	163779806	163779889	100626346	intron	TRABD2B
NC_010448.4	163830508	163830716	100626346	intron	TRABD2B
NC_010448.4	166334282	166334388	NC_010448.4:166333056:166335056	CGI_shore
NC_010448.4	166334282	166334388	100514412	intron	HECTD3
NC_010448.4	166334282	166334388	NC_010448.4:166334162:166336163	CGI_shore
NC_010448.4	166334282	166334388	100514412	exon	HECTD3
NC_010448.4	167238005	167238108	Target=PRE1g:1-250;Class=SINE/tRNA	repeat
NC_010448.4	167315953	167316208	NC_010448.4:167314118:167316119	CGI_shore
NC_010448.4	167315953	167316208	NC_010448.4:167315703:167316397	CGI
NC_010448.4	167315953	167316208	100736821	exon	B4GALT2
NC_010448.4	167315953	167316208	100736821	utr5	B4GALT2
NC_010448.4	167315953	167316208	100736821	promoter	B4GALT2
NC_010448.4	167315953	167316208	100736821	TSS	B4GALT2
NC_010448.4	167315953	167316208	Target=(GCCCGC)n:1-91;Class=Simple_repeat	repeat
NC_010448.4	169578756	169578819	Target=L2b:3130-3348;Class=LINE/L2	repeat
NC_010448.4	169981162	169981298	Target=PRE1f:23-249;Class=SINE/tRNA	repeat
NC_010448.4	169981162	169981298	Target=MIRb:109-218;Class=SINE/MIR	repeat
NC_010448.4	169981162	169981298	102166622	intron	LOC102166622
NC_010448.4	170000027	170000083	102166622	intron	LOC102166622
NC_010448.4	170000027	170000083	NC_010448.4:169999441:170000630	CGI
NC_010448.4	170000027	170000083	102166622	promoter	LOC102166622
NC_010448.4	170000027	170000083	100525880	intron	SCMH1
NC_010448.4	170367839	170368065	NC_010448.4:170365856:170367856	CGI_shore
NC_010448.4	170367839	170368065	100526228	intron	KCNQ4
NC_010448.4	170367839	170368065	Target=(GCCCC)n:1-128;Class=Simple_repeat	repeat
NC_010448.4	170367839	170368065	100526228	exon	KCNQ4
NC_010448.4	170367839	170368065	NC_010448.4:170367857:170368352	CGI
NC_010448.4	170382111	170382236	NC_010448.4:170381154:170383154	CGI_shore
[truncated: 2,559 more rows]

## Sheet: Table S6
Table S6 Functional annotation of DMR associated genes
GO_accession	Description	Term_type	P Value	Corrected P Value	Gene number	DMR gene ID
GO:0005488	binding	molecular_function	1.0762e-18	5.1225e-15	632	100153601,100739692,100157399,100156351,102165219,100155536,100157250,100520932,100511183,100521775,100151752,100153433,100525971,100623028,100519194,100154380,106510573,100523293,100156013,767626,102158190,574062,100519103,110256111,110256133,100516147,100526025,100736655,100520846,100623891,100286811,100519066,110257499,100153508,100519135,100512009,100521092,100518839,100739769,100738060,10062…
GO:0005515	protein binding	molecular_function	5.9959e-13	1.427e-09	357	102160515,100524762,100521829,100516268,100151743,100518510,100521161,100511556,100519127,100511452,110259367,100154659,100623287,110258336,100518293,100515628,100736982,100157110,396953,100523621,100516229,100738420,110260611,100157515,100520413,100526228,102158777,100152157,100518056,110257485,396763,100520235,396910,110256142,100154500,100520970,100626455,100515233,100515614,102167611,10051524…
GO:0003824	catalytic activity	molecular_function	2.1997e-08	3.4901e-05	406	110258336,100155053,100515628,100736982,396953,100516229,100523621,100157515,100738420,100624184,100513149,100152157,396763,100521829,100620226,100153213,100233182,100522182,100738753,100511556,100521161,100518510,100144480,100517774,100524569,100157054,100623287,100156588,102157546,100627191,397203,102161907,100620378,396910,110262058,100154500,110256142,100736645,100520970,100739347,100736631,1…
GO:0097159	organic cyclic compound binding	molecular_function	6.5184e-08	6.2056e-05	319	100624184,396763,396709,110257485,100155053,110258336,396953,100525077,100523621,100736982,106504173,100511452,110259367,100156588,100623287,100524569,102160515,100521829,100738753,100514526,100157848,106507707,100522636,100627191,100157041,100511501,102167611,100514933,396910,100520540,100499568,100152921,100520970,100624867,100737017,100522174,110260886,100620812,100737226,100337670,100152816,1…
GO:1901363	heterocyclic compound binding	molecular_function	6.5184e-08	6.2056e-05	319	100519066,100624523,110258088,100147710,100518839,100156389,100519135,100153508,100521353,100521258,100511412,100188905,100526025,100516147,110256111,100154380,100519194,100625616,100525971,100513936,100521775,100151752,110257402,396904,100157250,574062,102158190,110261221,100156013,100512885,100518441,100156351,100154373,102166225,100514237,100519629,100621314,100154208,100144419,100520049,10052…
GO:0051056	regulation of small GTPase mediated signal transduction	biological_process	1.9697e-07	0.00015626	18	1.00516e+158
GO:0043167	ion binding	molecular_function	3.152e-07	0.00021434	298	110257402,100157250,396904,100519194,100525971,100623028,767626,574062,110261221,100519331,100154208,100518441,100510946,100512885,100621314,102166225,100144419,100623891,100624523,110258088,100518839,100156389,100512566,100153508,100519135,100517799,100739769,100188905,100511412,100521353,100516147,100625536,100624854,100513081,100520077,100514624,100153895,102162297,100515322,100525601,10052372…
GO:0016740	transferase activity	molecular_function	5.3005e-07	0.00031538	182	100621029,106504470,110258084,100737299,100627428,110256149,100152937,100520100,100521442,100154650,102165734,100048960,100523542,110259211,100152536,100515286,397293,100523457,100519640,100522294,100517305,100192447,100517903,100625676,397070,100624272,100737777,100520446,100622812,100737722,100737226,100620926,100511316,100157832,100522174,110257285,100523532,100522463,100515873,100158140,39712…
GO:0018130	heterocycle biosynthetic process	biological_process	7.6509e-07	0.00040465	179	100519636,100525077,100520683,100523621,100523004,100515600,100525577,110257485,100513149,100152157,396709,100526228,100157662,110257406,100156117,100689266,100738753,100621009,100620898,100522528,100153986,100524569,100516908,100524726,110259367,110256621,100511452,100627191,100515017,100155702,102161907,100517152,100519890,100524854,100620215,100518487,106507707,100515395,100499568,100152921,39…
GO:0034654	nucleobase-containing compound biosynthetic process	biological_process	9.4195e-07	0.00044837	171	100152816,100737226,102157652,100623035,100515547,100625833,100620926,100627139,100157034,110260886,100157832,110257285,100155237,100512733,654416,110257384,100520060,100153673,100523029,100738835,100621443,654299,414902,100515633,110260403,100157255,102162711,106510450,102168017,100627428,100737299,100154650,100627877,100048960,100519809,100521442,100514152,100523457,100524645,100513827,10052019…
GO:0019438	aromatic compound biosynthetic process	biological_process	1.0868e-06	0.00047027	177	100623917,100511916,100171399,100512775,100525880,100623100,100737330,100512817,100515384,100515445,102165253,100524202,100135678,654297,100736699,100155087,100513081,100157532,100625536,100620286,100154830,100626722,100514019,396825,733643,100518049,100524747,100525656,100517307,100739541,100626723,100520585,110258080,100521411,100158102,100153584,102165197,100127155,100513153,102158906,10073704…
GO:0016787	hydrolase activity	molecular_function	1.985e-06	0.00078738	200	106505131,100156146,102161705,100511702,110258214,102159414,100522720,100153257,100520049,102166485,100158102,445533,100515887,397181,100622165,100524083,100144589,100521201,110256870,100523368,102164234,100158245,100519841,100034246,100515912,100524513,100135667,100153522,396825,100620470,100625563,100514019,100522382,106507781,100513900,100622071,100620399,100624854,100623872,102162297,10051298…
GO:1901362	organic cyclic compound biosynthetic process	biological_process	2.2044e-06	0.00080713	179	100738275,100359352,100519066,100628053,100517738,100147710,100519135,100512137,100153508,100510911,100521258,102158443,100048943,100511893,100526025,100516147,100511736,100525971,100519194,100151752,100152052,100626014,100516296,102158190,100523676,100627661,100520050,100522082,100523293,100519629,100621902,100521450,100518441,100156351,100154208,100519603,100156973,100516377,100524352,100512323…
GO:0071704	organic substance metabolic process	biological_process	2.7694e-06	0.00090405	404	100625563,100524978,100514019,100625290,100513900,100620286,100157532,102157525,100155087,100524202,100514820,100625215,100154944,100515445,100512775,100623100,100525880,100524966,100171399,100516442,574058,100155583,100154222,100525073,100623917,100156146,102161705,100520594,100522720,102158906,100513153,102166485,100127155,100153584,100624019,110258080,445533,100520585,100626723,100622994,10015…
GO:0016772	transferase activity, transferring phosphorus-containing groups	molecular_function	3.0151e-06	0.00090405	114	100624272,100625215,397070,100625676,100511727,100192447,100515445,100738472,100517305,100522294,100519640,100523457,100144518,100515286,100738060,100512648,100152536,100154222,110259211,100523723,100048960,100154650,100521442,110256149,100627428,100152937,100625536,100520100,100157532,102157525,100514624,100621029,100624019,100158102,102162711,396648,100524681,110257361,100623089,100520060,10051…
GO:0005509	calcium ion binding	molecular_function	3.3204e-06	0.00090405	49	100736974,100626940,100738275,100359352,100518293,100623891,100524434,100625833,100153556,396718,100522743,100515712,106505131,100737228,100512566,397474,100623940,100155607,100519135,100515772,100620623,100518493,100144506,100524248,100156254,100513444,102158510,100518938,100523671,100515322,100524621,100516581,100157351,100513900,100621933,100155276,100625563,100154998,100157589,100519144,10052…
GO:0006351	transcription, DNA-templated	biological_process	3.4187e-06	0.00090405	157	110257285,100157832,110260886,100157034,100627139,100620926,100625833,100515547,100623035,100737226,102157652,100152816,102162711,110260403,100157255,100515633,654299,414902,100738835,100523029,100153673,100520060,110257384,654416,100512733,100155237,100521442,100519809,100048960,100627877,100737299,102168017,106510450,100627428,100626399,110255474,100513827,100520199,100524645,100514152,10052622…
GO:0097659	nucleic acid-templated transcription	biological_process	3.4187e-06	0.00090405	157	100737040,102158906,100513153,102165197,100127155,100153584,100156146,100517221,100520594,100518049,100524747,100525656,733643,100158102,110258080,100521411,100520585,100626723,100739541,100620286,100513081,100155087,100524202,100135678,654297,100736699,396825,100514019,100626722,100154830,100525880,100623100,100171399,100511916,100623917,100512817,100515384,100515445,100737330,100517738,10062805…
GO:0032774	RNA biosynthetic process	biological_process	4.1942e-06	0.0010298	158	100514152,100626399,110255474,100520199,100513827,100524645,100737299,102168017,106510450,100627428,100521442,100519809,100048960,100627877,100738835,100523029,100153673,100520060,654416,110257384,100512733,100155237,102162711,100157255,110260403,100515633,654299,414902,100625833,100620926,100515547,100623035,102157652,100737226,100152816,110257285,100157832,110260886,100157034,100627139,10015292…
GO:0044238	primary metabolic process	biological_process	4.3267e-06	0.0010298	389	100621902,102160785,100521450,100513510,100623291,100514115,100512323,100516377,100524352,100156973,100513615,110255803,100521394,100514784,110255858,100152052,100152327,100626014,100516296,100627661,100520050,100522082,100523676,100524201,102158443,100153815,100156489,100511893,100048943,100516289,100156181,100154530,100514151,100522109,100511810,110260081,100516911,100511736,100359352,449001,10…
GO:0007265	Ras protein signal transduction	biological_process	4.8358e-06	0.0010463	15	1.00152e+131
GO:0046578	regulation of Ras protein signal transduction	biological_process	4.8358e-06	0.0010463	15	1.0052e+131
GO:0016773	phosphotransferase activity, alcohol group as acceptor	molecular_function	6.2117e-06	0.0012855	70	100519640,100523457,100154222,100738060,100512648,100144518,100515286,100511727,100625676,397070,100624272,100625215,100522294,100192447,100515445,102157525,100520100,100625536,110256149,100152937,100621029,100514624,100523723,110259211,100154650,100158140,100514320,110261151,100520060,100522463,100524681,396648,100520446,100521238,100737722,100737226,100522174,102161705,100154208,100514115,39691…
GO:0031323	regulation of cellular metabolic process	biological_process	6.6202e-06	0.001313	147	100689266,100738753,100156117,100621009,100522528,100524569,100516908,100511452,110259367,110256621,100519636,100520683,100525077,100525577,100515600,100152157,100513149,396709,100157662,110257406,100515395,100152921,100499568,396910,102164754,100514933,110260205,100156980,100517152,100620215,100524854,100518487,106507707,100512733,100155237,100515873,100738835,100523029,100153673,100520060,65441…
GO:0019222	regulation of metabolic process	biological_process	7.1623e-06	0.0013637	152	654299,414902,100157255,110260403,102162711,100515633,100512733,100515873,100155237,100153673,100523029,100738835,654416,396903,100520060,100627139,110260886,100157034,100157832,100737191,100623035,100152816,102157652,100737226,100620926,100515547,100524645,110255474,100626399,100520199,100513827,100153052,100514152,100521442,100519809,100627877,100737299,106510450,102168017,100627428,100516908,1…
GO:0006796	phosphate-containing compound metabolic process	biological_process	8.4974e-06	0.0014376	85	110259211,100523723,100154650,100520100,110256149,100152937,100625536,100624854,102157525,100514624,100621029,397070,100624272,100625215,100511727,100153595,102164826,102165253,100515445,100192447,100521513,100522294,100153962,100737330,100523457,100519640,100524966,100515286,100155583,100154222,396914,100517503,100522174,100514374,100622812,100152816,100521238,100737722,100621582,100520446,10062…
GO:0006355	regulation of transcription, DNA-templated	biological_process	8.5626e-06	0.0014376	136	100738835,100523029,100153673,100520060,654416,100512733,100155237,102162711,110260403,100157255,100515633,414902,654299,100620926,100515547,100623035,102157652,100737226,100152816,100157832,110260886,100157034,100627139,100514152,100626399,110255474,100513827,100520199,100524645,100737299,102168017,106510450,100627428,100519809,100521442,100627877,100522528,100738753,100689266,100156117,10062100…
GO:1903506	regulation of nucleic acid-templated transcription	biological_process	8.5626e-06	0.0014376	136	100522082,100523293,100520050,100627661,100523676,102158190,100626014,100152052,100519194,100525971,110255803,100622925,100512323,100524352,100156973,100519603,100154208,100518441,100521450,100519629,100510911,100512137,100519135,100147710,100517738,100628053,100738275,100359352,100511736,100511893,102158443,100521258,396825,100514019,100626722,100154830,100620286,100513081,100155087,100135678,10…
GO:0019219	regulation of nucleobase-containing compound metabolic process	biological_process	9.1003e-06	0.0014376	137	100517152,100620215,100524854,106507707,100518487,100515395,100152921,100499568,396910,100514933,102164754,110260205,100156980,100519636,100520683,100525577,100515600,100152157,100513149,396709,100157662,110257406,100738753,100689266,100156117,100621009,100522528,100524569,100516908,100511452,110259367,110256621,100737299,106510450,102168017,100627428,100521442,100519809,100627877,100514152,10052…
GO:2001141	regulation of RNA biosynthetic process	biological_process	9.156e-06	0.0014376	136	100512733,100155237,100738835,100153673,100523029,100520060,654416,654299,414902,102162711,110260403,100157255,100515633,100623035,102157652,100737226,100152816,100620926,100515547,100157034,110260886,100627139,100157832,100514152,100524645,100626399,110255474,100513827,100520199,100737299,106510450,100627428,102168017,100521442,100519809,100627877,100738753,100689266,100156117,100621009,10052252…
GO:0051252	regulation of RNA metabolic process	biological_process	9.3623e-06	0.0014376	136	100518441,100521450,100519629,100519603,100154208,100622925,100524352,100156973,100512323,110255803,100519194,100525971,100152052,102158190,100626014,100523676,100520050,100522082,100523293,100627661,100511893,102158443,100521258,100511736,100359352,100738275,100628053,100517738,100147710,100510911,100519135,100512137,100511916,100623917,100525880,100171399,100515384,100515445,100512817,100737330…
GO:0006793	phosphorus metabolic process	biological_process	1.0474e-05	0.0015383	85	100048943,100620898,100511150,100628152,100521353,110260081,100156588,100157054,100156181,100153986,100523004,100624523,100155053,396953,100738420,100153508,396763,102158899,100514115,100154208,102167387,100152572,100625330,100157041,100521394,102167611,100519890,102161907,100155702,100520687,397488,100518487,102158590,574062,100516296,100627936,100626014,110261151,100514320,100157644,100154844,1…
GO:0005085	guanyl-nucleotide exchange factor activity	molecular_function	1.0665e-05	0.0015383	18	1.00516e+158
GO:0007266	Rho protein signal transduction	biological_process	1.1389e-05	0.0015489	13	1.00513e+113
GO:0035023	regulation of Rho protein signal transduction	biological_process	1.1389e-05	0.0015489	13	1.00152e+113
GO:0010468	regulation of gene expression	biological_process	1.2024e-05	0.0015898	138	100359352,100738275,100517738,100628053,100147710,100512137,100519135,100510911,102158443,100521258,100511893,100511736,100525971,100519194,100152052,100626014,102158190,100520050,100523293,100522082,100627661,100523676,100519629,100521450,100518441,100154208,100519603,100512323,100156973,100524352,100622925,110255803,100153584,102165197,100127155,102158906,100513153,100517221,100156146,733643,10…
GO:2000112	regulation of cellular macromolecule biosynthetic process	biological_process	1.3217e-05	0.0017004	137	100512323,100524352,100156973,100622925,110255803,100519629,100521450,100518441,100154208,100519603,100626014,102158190,100522082,100520050,100523293,100627661,100523676,100525971,100519194,100152052,100511736,100521258,102158443,100511893,100147710,100512137,100519135,100510911,100738275,100359352,100628053,100517738,100737330,100512817,100515384,100515445,100623917,100511916,100171399,100525880…
GO:0010556	regulation of macromolecule biosynthetic process	biological_process	1.4105e-05	0.0017055	137	100515395,100152921,100499568,396910,102164754,100514933,110260205,100156980,100517152,100524854,100620215,106507707,100518487,100156117,100738753,100689266,100621009,100522528,100516908,100524569,110259367,110256621,100511452,100519636,100520683,100515600,100525577,100513149,100152157,396709,100157662,110257406,100514152,100524645,110255474,100626399,100513827,100520199,100737299,106510450,10062…
GO:0031326	regulation of cellular biosynthetic process	biological_process	1.4105e-05	0.0017055	137	100514152,100524645,100626399,110255474,100513827,100520199,100737299,102168017,106510450,100627428,100521442,100519809,100627877,100512733,100155237,100738835,100523029,100153673,100520060,654416,654299,414902,102162711,110260403,100157255,100515633,100737191,100623035,100737226,102157652,100152816,100620926,100515547,100157034,110260886,100627139,100157832,100515395,100152921,100499568,396910,1…
GO:0008152	metabolic process	biological_process	1.5004e-05	0.0017055	454	100513594,100523532,100522463,110257384,396903,110261151,110261028,100623089,100738835,100621443,414902,654299,100513419,100515633,100157255,100523915,100152816,100337670,102157652,100737226,100623035,100621582,110260886,397474,100737017,100522174,397089,100521346,100514152,100625424,100519640,100625428,100522294,100513827,100522730,100522875,102164826,100626399,102158332,102161092,100621029,1001…
GO:0009889	regulation of biosynthetic process	biological_process	1.5048e-05	0.0017055	137	110257406,100157662,396709,100513149,100152157,100515600,100525577,100520683,100519636,110259367,110256621,100511452,100524569,100516908,100522528,100621009,100156117,100738753,100689266,106507707,100518487,100524854,100620215,100517152,100156980,110260205,102164754,100514933,396910,100499568,100152921,100515395,100157832,100627139,110260886,100157034,100515547,100620926,100152816,102157652,10073…
GO:0051171	regulation of nitrogen compound metabolic process	biological_process	1.5048e-05	0.0017055	137	100627877,100521442,100519809,106510450,100627428,102168017,100737299,100524645,100513827,100520199,100626399,110255474,100514152,110260886,100157034,100627139,100157832,102157652,100737226,100152816,100623035,100737191,100515547,100620926,654299,414902,100515633,102162711,110260403,100157255,100155237,100512733,100520060,654416,100738835,100523029,100153673,106507707,100518487,100620215,10052485…
GO:1902531	regulation of intracellular signal transduction	biological_process	1.7939e-05	0.0019858	19	1.00158e+167
GO:0016070	RNA metabolic process	biological_process	1.8692e-05	0.0020221	186	110260394,100512817,100154944,100515445,100515384,100737330,100623100,100525880,100171399,100511916,100623917,396825,100514019,100626722,100154830,100620286,100513081,100157532,100155087,100524202,100135678,654297,100736699,100158102,110258080,100521411,100520585,100626723,100739541,100515887,100518049,100525656,100524747,733643,106509842,100515712,100156146,100517221,100520594,100737040,10215890…
GO:0003677	DNA binding	molecular_function	1.9269e-05	0.0020382	156	100157662,110257485,396709,100515600,100523004,106504173,100519636,100523621,100525077,100520683,100524726,110259367,100511452,100524569,102160515,100738753,100689266,100621009,100524854,100620215,100518487,100157848,100514526,100152015,100517152,100627191,100515017,100517336,100156980,100514933,102164754,100499568,100152921,396910,100515395,110257285,100737017,100627139,100157034,110260886,10062…
GO:0007264	small GTPase mediated signal transduction	biological_process	2.207e-05	0.0022838	36	100626582,102157525,100627663,100522636,100151931,100049657,100525075,397631,100154830,100621933,100515575,100153143,100624668,100156351,100514827,100144419,100516377,110258338,100511786,100515547,100522720,106505131,100157034,100620812,100517400,100518447,100520058,100522463,100513495,100521353,100625238,100135667,100158048,100621167,100516147,100625226
GO:0031012	extracellular matrix	cellular_component	2.5425e-05	0.0025749	23	1.00524e+200
GO:0060255	regulation of macromolecule metabolic process	biological_process	2.9409e-05	0.0028908	141	100514152,100626399,110255474,100513827,100520199,100524645,100737299,102168017,106510450,100627428,100519809,100521442,100627877,100738835,100153673,100523029,100520060,654416,396903,100512733,100155237,102162711,100157255,110260403,100515633,654299,414902,100620926,100515547,100737191,100623035,100737226,102157652,100152816,100157832,110260886,100157034,100627139,100499568,100152921,396910,1005…
GO:0080090	regulation of primary metabolic process	biological_process	2.9758e-05	0.0028908	140	100519603,100154208,100518441,100521450,100519629,110255803,100622925,100524352,100156973,100512323,100152052,100519194,100525971,100523676,100520050,100522082,100523293,100627661,102158190,100626014,100511893,102158443,100521258,100511736,100628053,100517738,100738275,100359352,100510911,100519135,100512137,100147710,100525880,100171399,100511916,100623917,100515445,100515384,100512817,100737330…
GO:0005578	proteinaceous extracellular matrix	cellular_component	3.9413e-05	0.0036481	17	1.00513e+146
GO:0043170	macromolecule metabolic process	biological_process	4.053e-05	0.0036481	341	100524417,396718,100512137,100359352,449001,100738275,100628053,100517738,100156181,100135669,100522109,100154530,100514151,100511810,100516911,100511736,102158443,100153815,100156489,100511893,100626014,100514160,100516296,100523676,100627661,100522082,100520050,110255858,100152052,100156973,100524352,100516377,100512323,110255803,100514784,102160785,100621902,100521450,100513510,100623291,10051…
GO:0005088	Ras guanyl-nucleotide exchange factor activity	molecular_function	4.062e-05	0.0036481	13	1.00152e+113
GO:0005089	Rho guanyl-nucleotide exchange factor activity	molecular_function	4.062e-05	0.0036481	13	1.00628e+113
GO:0044237	cellular metabolic process	biological_process	4.9997e-05	0.0044072	366	100516911,100511736,110260081,100511810,100154530,100522109,100135669,100156181,100156489,100511893,100048943,102158443,100513275,100512137,396718,100524417,100517738,100628053,100359352,449001,100738275,100514784,100521394,110255803,100512323,100524352,100513615,100156973,100516377,100514115,100623291,100521450,100621902,102160785,100520050,100627661,100522082,100523676,100513089,100516296,10015…
GO:0001882	nucleoside binding	molecular_function	5.8171e-05	0.0050344	116	110258338,100522294,100192447,100625428,100515445,100511727,102165253,110260394,110258083,397070,100625215,100154222,100152536,574058,100155583,100515286,100624668,397293,100519640,100625424,100523457,100515575,100621933,100154830,100737608,100154650,100521067,100622071,100523723,100522382,100514019,397373,110259211,100621029,100049657,102161092,100514624,102157525,100520100,110256149,100625536,1…
GO:0015075	ion transmembrane transporter activity	molecular_function	6.0441e-05	0.0050819	83	106509950,100519817,100737944,100736832,102157525,100519680,100152567,100521067,100738346,100155276,100154391,100521346,100155583,397089,397293,100737330,110260947,110256150,106506400,100625160,100512382,100521138,100737226,100737722,100155015,445520,100157034,100621879,100522174,100518733,100737017,100519841,100626898,100523504,100515873,733643,102164234,654416,100517307,100515887,100517050,1005…
GO:0097367	carbohydrate derivative binding	molecular_function	6.0855e-05	0.0050819	122	100516102,100157361,100627191,100155702,100522636,110257402,100515428,100157250,396904,100627936,100520977,574062,100626014,397631,100152572,100518441,100512885,100514115,396910,100154208,102166057,100499568,102167611,100157041,100144419,396953,106504173,100738275,100736982,100523004,100624523,100525547,100515600,110258336,100155053,100522548,100151812,396763,100153508,100625238,100521353,1006281…
GO:0000166	nucleotide binding	molecular_function	6.8304e-05	0.0054377	131	100515512,396903,110261151,100515873,100522174,396914,100157034,100620812,100737722,100337670,100624272,397070,100620777,100513827,100522294,110258338,100192447,100625428,397293,100624668,100515575,100625424,100523457,100519640,100152536,100521603,100515286,397373,110259211,100155276,100737608,100621933,100521067,100154650,110256149,100523668,100520100,100152937,100621029,100049657,102161092,1006…
GO:1901265	nucleoside phosphate binding	molecular_function	6.8304e-05	0.0054377	131	100620912,100515445,100511727,110260394,102165253,110258083,100625215,100154222,100155583,574058,100512775,100154830,100622071,100523723,100514019,100522382,110255868,100514624,102157525,100625536,100524681,100739614,100153250,100135667,100158245,100523368,100514320,100524083,110258214,100462749,100521306,106505131,102166485,100521238,100520049,100522720,100144419,100518441,100512885,100154208,10…
GO:0004672	protein kinase activity	molecular_function	6.8542e-05	0.0054377	54	396763,100153508,100522174,102161705,100521238,396953,100737722,100516229,449001,100523004,100624523,100155053,100152987,100156588,100524681,100521353,100522463,100628152,110261151,102162152,100514320,100188905,100158140,100511150,100627936,574062,100626014,100518487,110259211,100523723,100514624,100621029,100155702,110256149,100625536,100152937,100520100,102157525,100515445,100192447,100522294,3…
GO:0006139	nucleobase-containing compound metabolic process	biological_process	8.7682e-05	0.006842	233	100515547,100625833,100620926,100622812,100337670,100152816,100737226,102157652,100737191,100621582,100623035,100511783,100737017,100157832,110257285,100627139,100157034,110260886,110257384,654416,100520060,100153673,100523029,100738835,100626866,100155237,100512733,100512018,100515633,100157255,110260403,100523915,102162711,100621443,654299,414902,106510450,100627428,102168017,100737299,11026019…
GO:0036094	small molecule binding	molecular_function	9.1274e-05	0.0070075	133	100144419,100154208,100514115,100512885,100518441,100626014,574062,100157250,396904,110257402,100511810,100522109,100188905,100511412,100048943,100519608,100516289,100521353,100153508,110262035,100624523,100738275,100511727,102165253,110260394,110258083,100625215,100515445,100620912,100512775,100154222,100155583,574058,100522382,100514019,100523723,110255868,100154830,100622071,102157525,10062553…
GO:0004175	endopeptidase activity	molecular_function	9.7009e-05	0.0073296	57	396718,100524417,100152157,100737017,100512566,100156146,100510911,397474,100157832,100737226,100153257,100520683,100627965,100736974,100155148,100627436,100621864,100515628,100515512,445533,100628047,102158510,100158245,100515772,100738753,100515912,100513495,100524513,100522182,110261028,100520060,100521201,110256870,100521067,100514419,102164926,100625563,100523542,100141405,102162297,10051919…
GO:0022857	transmembrane transporter activity	molecular_function	0.00010361	0.0077063	97	100517307,100515887,100517050,733643,100523368,102164234,100520060,654416,100519841,100626898,100158245,100515873,100523504,100518733,100522174,100737017,100157034,445520,100621879,100155015,100512382,100521138,100737722,100737226,110256150,106506400,100625160,110260947,100737330,397293,100512648,100152536,100521346,574058,397089,100155583,100738346,100155276,100154391,100521067,102157525,1005196…
GO:0048583	regulation of response to stimulus	biological_process	0.00010749	0.0077446	27	100155702,100151931,100621029,100525762,100627663,100152324,102157525,100626582,100515547,100154830,397631,100514019,100522463,100513495,100520058,100156351,100517400,100518447,100516377,100621167,100516147,100217389,100158048,100516124,100627864,100514827,100153049
GO:0015077	monovalent inorganic cation transmembrane transporter activity	molecular_function	0.00011139	0.0077446	45	445520,100621879,100522174,100737017,100624184,100627965,100521138,110261676,100737226,100737722,100525577,100517307,100515887,100153986,100517050,397358,100153803,100626898,100515873,100517680,733643,102164234,654416,100620378,100516296,100514526,397488,106509950,100519817,100737944,102161907,100519194,100518274,102157546,100519680,100519890,110257402,100152567,100737330,110256150,100515233,1001…
GO:0035639	purine ribonucleoside triphosphate binding	molecular_function	0.00011158	0.0077446	114	110258336,100155053,100525547,100624523,100515600,100523004,100738275,106504173,100736982,396953,100153508,100522548,100151812,396763,100511150,100521829,100188905,100511412,100048943,100516289,100625238,100521353,100628152,100511810,100625226,106507446,100156588,100157250,396904,100515428,110257402,100157361,100155702,100627191,100522636,100516102,100626014,100627936,574062,100520977,100154208,1…
GO:0022891	substrate-specific transmembrane transporter activity	molecular_function	0.00011329	0.0077446	86	100738346,100155276,100154391,100521067,102157525,100519680,100152567,106509950,100519817,100736832,100737944,110256150,100625160,106506400,100737330,110260947,397293,100512648,100521346,397089,100155583,100522174,100518733,100737017,445520,100157034,100621879,100155015,100512382,100521138,100737226,100737722,100515887,100517307,100517050,733643,102164234,100520060,654416,100519841,100626898,1005…
GO:0032553	ribonucleotide binding	molecular_function	0.00011447	0.0077446	116	110258338,100522294,100625428,100515445,100192447,102165253,110260394,100511727,100625215,110258083,397070,100152536,100154222,574058,100155583,100515286,397293,100624668,100515575,100625424,100519640,100523457,100737608,100154830,100621933,100521067,100622071,100154650,397373,100523723,100522382,100514019,110259211,100049657,100621029,100514624,102161092,102157525,100625536,110256149,100523668,1…
GO:0016301	kinase activity	molecular_function	0.00011676	0.0077446	75	100628152,100521353,100511150,100188905,100516289,102162152,100156588,100152987,449001,100516229,396953,100155053,100515600,100624523,100523004,396763,100738420,100153508,102167387,100152572,100154208,396910,100514115,100521394,100157041,100513228,100155702,100627191,100515428,100626014,574062,100627936,100518487,100522463,100158245,100158140,100518806,100514320,110261151,100524681,110257361,1005…
GO:0001883	purine nucleoside binding	molecular_function	0.00011877	0.0077446	114	100153508,100151812,100522548,396763,110258336,100155053,100624523,100525547,100515600,100523004,106504173,100738275,100736982,396953,100511810,100625226,106507446,100156588,100511150,100521829,100188905,100511412,100048943,100516289,100521353,100625238,100628152,100626014,100627936,574062,100520977,100157250,396904,110257402,100515428,100157361,100155702,100627191,100522636,100516102,100144419,1…
GO:0032549	ribonucleoside binding	molecular_function	0.00011877	0.0077446	114	100521238,100337670,100520049,100737722,100522720,100620812,100157034,110258214,100522174,100521306,106505131,100135667,100515873,100158245,100523368,396903,100514320,110261151,100524083,100524681,100515512,100621029,100049657,102161092,100514624,102157525,110256149,100625536,100520100,100152937,100523668,100621933,100737608,100154830,100154650,100622071,100521067,100523723,100522382,100514019,39…
GO:0032550	purine ribonucleoside binding	molecular_function	0.00011877	0.0077446	114	110258338,100522294,100625428,100192447,100515445,102165253,110260394,100511727,100625215,397070,110258083,100152536,100154222,100155583,574058,100515286,397293,100624668,100515575,100523457,100625424,100519640,100737608,100154830,100621933,100521067,100622071,100154650,397373,100514019,100523723,100522382,110259211,100621029,100049657,100514624,102161092,102157525,100152937,110256149,100625536,1…
GO:0035556	intracellular signal transduction	biological_process	0.0001229	0.0078433	60	100522720,100511786,100515547,100516229,100153508,110257285,100519708,100623940,100517503,106505131,100620812,100157034,100518447,100517400,100514320,100521353,100625238,100135667,100522463,100513495,100521161,100517025,100520058,100158048,100625226,102168165,100516147,100157850,100156588,100621167,100516581,102157525,100625536,100627428,100626582,100525075,100621029,100049657,100522636,100151931…
GO:0005215	transporter activity	molecular_function	0.00012358	0.0078433	108	397089,574058,100155583,100521346,100512648,100152536,106505385,397293,110260947,100737330,100152591,100625160,106506400,110256150,100736832,100737944,100519817,106509950,100152567,100519680,102157525,100521067,100154391,100738346,100155276,100515873,100523504,100158245,100626898,100519841,396903,654416,100520060,100523368,102164234,733643,100517050,100517307,100515887,100737722,100737226,1005211…
GO:0046483	heterocycle metabolic process	biological_process	0.00013807	0.0086474	239	100621443,654299,100513419,414902,100512018,100515633,100157255,110260403,100523915,102162711,100155237,100512733,654416,110257384,100520060,100153673,100523029,100738835,100626866,100627139,100157034,110260886,100737017,100157832,110257285,100622812,100152816,100337670,102157652,100737226,100737191,100621582,100623035,100511783,100515547,100620926,100625833,100625428,100524645,100520199,10051382…
GO:0022892	substrate-specific transporter activity	molecular_function	0.00014437	0.0088281	90	100152157,396718,100625418,100526228,100518839,100624184,100627965,110261676,100516526,100525577,100135669,100625226,100153986,397358,100626534,100154055,100153803,641343,100517680,100620378,100516296,100519996,100523293,100155991,100514526,397488,100515017,100522530,102161907,397203,100518274,100519194,102157546,100519890,110257402,100157069,100512323,100515233,100514784,100154525,100521450,1005…
GO:0017076	purine nucleotide binding	molecular_function	0.00014466	0.0088281	115	100625536,110256149,100523668,100520100,100152937,102157525,102161092,100514624,100621029,100049657,110259211,100523723,100522382,100514019,397373,100154650,100521067,100622071,100621933,100737608,100154830,100625424,100519640,100523457,100515575,100624668,397293,100515286,574058,100155583,100154222,100152536,100513827,397070,110258083,100625215,100511727,102165253,110260394,100625428,100515445,1…
GO:0032555	purine ribonucleotide binding	molecular_function	0.00014896	0.0089755	114	106507446,100156588,100625226,100511810,100628152,100625238,100521353,100516289,100048943,100511412,100521829,100511150,100188905,396763,100151812,100522548,100153508,396953,100736982,106504173,100738275,100624523,100525547,100515600,100523004,110258336,100155053,102167611,100157041,100144419,100518441,100512885,100152572,396910,100514115,100499568,100154208,100520977,574062,100627936,100626014,1…
GO:0006464	cellular protein modification process	biological_process	0.00015493	0.0091044	90	100514320,396903,110261151,100157644,100523532,100522463,100154844,110258080,414902,100524681,100513419,100514374,100157102,100620926,102157652,100737722,100521238,100622812,100522174,100522920,100524966,100523457,100512775,100519640,100519724,100515286,100154222,100625215,397070,100511727,100153595,100192447,100515445,100153962,100522294,100521513,110256149,100520100,100152937,100625536,10062466…
GO:0036211	protein modification process	biological_process	0.00015493	0.0091044	90	100522920,100522174,100622812,100521238,102157652,100737722,100620926,100157102,100514374,414902,100513419,100524681,110258080,100522463,100154844,100523532,100157644,396903,110261151,100514320,100524978,100523723,110259211,100621029,100514624,102162297,100624854,110258084,102157525,100624664,100520100,110256149,100152937,100625536,100522294,100521513,100153962,100192447,100515445,100153595,10051…
GO:0005524	ATP binding	molecular_function	0.00015864	0.0092088	100	100621029,100514624,102161092,102157525,100625536,110256149,100152937,100520100,100154830,100737608,100622071,100521067,100154650,397373,100514019,100523723,100522382,110259211,100152536,100154222,574058,100515286,100155583,397293,100515575,100523457,100625424,100519640,100522294,100625428,100192447,100515445,110260394,102165253,100511727,100625215,110258083,397070,100737722,100520049,100337670,1…
GO:0030554	adenyl nucleotide binding	molecular_function	0.00016519	0.0094738	101	100516102,100155702,100627191,100157361,100515428,110257402,396904,100157250,100520977,574062,100627936,100626014,100512885,100518441,100152572,396910,100514115,100499568,100154208,102167611,100157041,100144419,396953,100736982,100738275,106504173,100525547,100624523,100523004,100515600,110258336,100155053,396763,100522548,100153508,100628152,100521353,100516289,100511412,100521829,100188905,1005…
GO:0032559	adenyl ribonucleotide binding	molecular_function	0.00017314	0.0098113	100	102157525,100152937,110256149,100625536,100520100,100621029,100514624,102161092,397373,100523723,100514019,100522382,110259211,100154830,100737608,100521067,100622071,100154650,397293,100515575,100519640,100625424,100523457,100152536,100154222,574058,100155583,100515286,102165253,110260394,100511727,100625215,110258083,397070,100522294,100625428,100515445,100192447,100522720,100520049,100737722,1…
GO:0006725	cellular aromatic compound metabolic process	biological_process	0.00020588	0.011529	238	100737040,100513153,102158906,102165197,102166485,100127155,102157744,100153584,100517503,106509842,100156146,100515712,100517221,100520594,100525656,100524747,100518049,733643,100624019,100158102,110258080,100521411,100626723,100520585,100622994,100511966,397181,100517307,100739541,100515887,100620286,100625536,100513081,102157525,100157532,100155087,100135678,100514820,100524202,100736699,65429…
GO:1901360	organic cyclic compound metabolic process	biological_process	0.00021324	0.011726	241	100518487,106507707,100514526,100524854,100620215,100520977,100519890,100517152,102161907,100155702,100627191,100515017,100156980,110260205,100517336,100154525,100739347,100627113,102164754,102167611,100514933,396910,100520540,100152921,100499568,100515395,100738747,110257406,102162776,100157662,100526228,396709,100513149,110257485,100152157,100523004,100515600,100525577,100525077,100520683,10052…
GO:0046872	metal ion binding	molecular_function	0.00021431	0.011726	190	100627428,100519829,100737299,100157351,100523671,100621029,100155276,100154998,100523542,100517681,100524832,100521442,100621933,100513371,100625424,100624668,100157589,100620777,100144468,100153049,100157198,100524645,100517305,100174959,100620481,100153737,100524434,100157102,100625833,100337670,100623035,100737017,397474,110257285,100152910,102159363,110260886,445520,100518806,110257384,65441…
GO:0009966	regulation of signal transduction	biological_process	0.00022527	0.012138	23	1.00156e+203
GO:0042578	phosphoric ester hydrolase activity	molecular_function	0.00022696	0.012138	34	100513900,100517681,100523187,396825,100155276,100513936,100135678,100624854,100516581,100520203,100153962,100519379,102167611,100511727,100153595,100154222,100154500,100520970,396910,100524966,102167043,445520,102158899,100153556,100144587,100623940,100622812,100157453,100514374,100156181,100521161,100521988,100738835,110261151
GO:0043169	cation binding	molecular_function	0.00023914	0.012648	191	100621029,100523671,100157351,100519829,100737299,100627428,100621933,100521442,100524832,100517681,100523542,100154998,100155276,100157589,100624668,100625424,100513371,100620481,100174959,100517305,100524645,100157198,100153049,100620777,100144468,100623035,100337670,100625833,100157102,100153737,100524434,110260886,445520,102159363,100152910,110257285,397474,100737017,100513495,100521988,10073…
GO:0090304	nucleic acid metabolic process	biological_process	0.00028119	0.014708	214	100518049,100524747,100525656,733643,100626723,100622994,100520585,100511966,397181,100739541,100515887,100624019,100158102,100521411,110258080,102165197,102166485,100127155,102157744,100153584,100737040,102158906,100513153,100520594,100156146,106509842,100515712,100517221,100511916,100623917,100623100,100525880,100171399,100154944,100512817,100515445,100515384,100737330,110260394,100155087,10052…
GO:0003953	NAD+ nucleosidase activity	molecular_function	0.00028687	0.014843	3	1.00154e+26
GO:0022890	inorganic cation transmembrane transporter activity	molecular_function	0.00029225	0.014958	59	100521450,397089,100155583,100521346,397293,100737330,100512323,100514784,100515233,100154525,110256150,100737944,102161907,100519194,100518274,100515017,106509950,100519817,110257402,100519890,100152567,102157525,102157546,100519680,100521067,100516296,100620378,100514526,397488,100626898,100153803,100517680,100515873,100154055,654416,733643,102164234,100517050,100515887,100517307,100153986,1006…
GO:0070011	peptidase activity, acting on L-amino acid peptides	molecular_function	0.0003031	0.015197	66	102164926,100625563,100141405,100523542,100521067,100519829,102162297,100512987,100522730,100626399,100518325,100738472,397293,100511916,100157589,574058,100525073,397474,100156146,100737017,100157832,100157102,100737226,100153257,100155148,445533,100515512,100520060,110261028,110256870,100521201,100158245,100524513,100515912,100513495,100620378,100514419,100519194,100514784,100627113,110256604,1…
GO:0010646	regulation of cell communication	biological_process	0.0003033	0.015197	23	1.00526e+203
GO:0023051	regulation of signaling	biological_process	0.00032148	0.01594	23	1.00156e+203
GO:0043168	anion binding	molecular_function	0.00033682	0.016529	130	100515873,396903,110261151,100515512,100737722,100337670,100157034,100620812,100511316,100522174,100152536,100515286,397293,100624668,100515575,100625424,100523457,100519640,100522294,110258338,100625428,100192447,100626399,397070,100049657,100621029,102161092,110256149,100152937,100523668,100155023,100520100,100624664,100737608,100621933,100521067,100154650,397373,110259211,100628152,100625238,1…
GO:0006468	protein phosphorylation	biological_process	0.00035631	0.017306	45	100627936,574062,100626014,100518487,110259211,100523723,100514624,100621029,100155702,110256149,100152937,100625536,100520100,102157525,100192447,100515445,100522294,397070,100625215,100157041,100511727,100152572,100515286,100154222,100523457,100519640,100514115,100154208,396763,100153508,100522174,100521238,396953,100737722,100624523,100523004,100155053,100156588,100524681,100521353,100522463,1…
GO:0015267	channel activity	molecular_function	0.00042877	0.02041	39	110256150,100515233,100625160,100521450,397293,397326,100521067,100516296,100523293,100519996,100514526,100155276,100738346,100154391,100522530,100515017,100519817,100737944,100736832,100518274,100519680,100152567,110257402,100515887,100135669,100626534,100154055,100626898,100523504,733643,100739769,396718,100526228,100522174,100518733,100512382,100521138,100516526,100155015
GO:0022803	passive transmembrane transporter activity	molecular_function	0.00042877	0.02041	39	100736832,100737944,100518274,100515017,100522530,100519817,110257402,100152567,100519680,100521067,100516296,100738346,100155276,100514526,100154391,100519996,100523293,100521450,397326,397293,100515233,100625160,110256150,100512382,100521138,100516526,100155015,396718,100739769,100526228,100522174,100518733,100626898,100523504,100154055,733643,100515887,100135669,100626534
GO:0016310	phosphorylation	biological_process	0.00043719	0.020604	51	100522463,100628152,100521353,100514320,110261151,100511150,100156588,100157054,100524681,110260081,100737722,396953,100152816,100521238,100621582,100624523,100523004,100155053,396763,100738420,100153508,100522174,100515286,100152572,100154222,100514115,100519640,100523457,100154208,100515445,100192447,100522294,100625215,100157041,397070,100521394,100511727,100514624,100155702,100621029,10052010…
GO:0044260	cellular macromolecule metabolic process	biological_process	0.0004484	0.020925	304	100525577,100515600,100523004,100519636,100627436,100520683,100157662,102162776,110257406,102158899,100511150,100522528,100689266,100628152,100621009,102158510,100524726,110256621,100516908,100517152,100515017,100155702,100620215,100524854,397488,100518487,100520977,100627936,100738747,100515395,100152572,100627113,100517336,110260205,100156980,100154525,102164754,100157102,100625833,100620926,10…
GO:0005096	GTPase activator activity	molecular_function	0.00051445	0.023751	12	1.00158e+104
GO:0008324	cation transmembrane transporter activity	molecular_function	0.00051892	0.023751	62	100518274,100519194,102161907,100737944,100519817,106509950,100515017,110257402,100152567,100519890,100519680,102157525,102157546,100516296,100521067,100620378,397488,100514526,397089,100155583,100521450,100521346,100519603,397293,100512323,100737330,100154525,100515233,100514784,110256150,100737722,100737226,110261676,100521138,100627965,100155015,100525577,396718,100621879,100157034,445520,1001…
GO:0030695	GTPase regulator activity	molecular_function	0.00055124	0.024989	13	1.00156e+113
GO:1901135	carbohydrate derivative metabolic process	biological_process	0.00056865	0.025536	42	100523532,100154844,100135667,100626898,100518510,100157644,414902,100513419,100153986,100621443,100153250,100157054,110260081,100621582,100152816,100153508,100624418,100517503,396914,100625330,100155583,100736645,100739692,100523457,100512775,100737330,100521513,102167611,102165253,100521394,100514784,102161907,100515404,110258084,100625536,100519890,100514160,100154650,100516296,102158590,10052…
GO:0071944	cell periphery	cellular_component	0.00059488	0.025936	52	100157832,100737017,100517503,100510911,100623940,100624053,100157034,100739769,102167043,100152396,102166950,100153556,100627965,110261676,449001,100621864,100525077,100737226,100517307,100135669,100522109,100152987,100154530,733643,100520060,100738753,100154055,100521990,110256137,106508428,100521161,100515772,100515873,102164926,100624925,100521067,100510966,396904,100157250,100152567,10015438…
GO:0005216	ion channel activity	molecular_function	0.00059519	0.025936	38	100512382,100521138,100516526,100155015,396718,100526228,100522174,100518733,100626898,100523504,100154055,733643,100515887,100135669,100626534,100736832,100737944,100518274,100522530,100515017,100519817,100152567,110257402,100519680,100521067,100516296,100514526,100155276,100738346,100154391,100523293,100519996,100521450,397326,397293,100515233,100625160,110256150
GO:0022838	substrate-specific channel activity	molecular_function	0.00059519	0.025936	38	396718,100526228,100518733,100522174,100521138,100516526,100512382,100155015,100135669,100515887,100626534,100154055,100523504,100626898,733643,100516296,100521067,100519996,100523293,100154391,100514526,100155276,100738346,100519817,100515017,100522530,100518274,100736832,100737944,100519680,110257402,100152567,110256150,100515233,100625160,100521450,397293,397326
GO:0008236	serine-type peptidase activity	molecular_function	0.0006048	0.025936	30	100515912,100513495,100511916,100515772,574058,100519103,110256870,100520060,110261028,100522182,100738472,445533,100522730,100621864,100627965,100512987,100519194,100737226,102162297,100520683,100157195,100519829,100515628,100514419,100620378,100521067,397474,100510911,100737017,102164926
GO:0017171	serine hydrolase activity	molecular_function	0.0006048	0.025936	30	100521067,100514419,100620378,102164926,100737017,397474,100510911,100520683,102162297,100737226,100519194,100512987,100627965,100621864,100515628,100519829,100157195,445533,100738472,100522730,574058,100511916,100515772,100513495,100515912,110261028,100520060,100522182,110256870,100519103
GO:0008047	enzyme activator activity	molecular_function	0.00061496	0.026136	14	1.00621e+122
GO:0055085	transmembrane transport	biological_process	0.00062716	0.026418	66	100738346,100155276,100154391,100152567,100519680,106509950,100519817,100625160,110260947,100737330,397293,100152536,100737017,100525195,100518733,100621879,100157034,100155015,100737226,100512382,100521138,654416,100523368,102164234,100158245,100515873,100514526,397488,100155991,100523293,100522082,100516296,100620378,110257402,100519890,102157546,100157250,102161907,100519194,100518274,10052253…
GO:0004252	serine-type endopeptidase activity	molecular_function	0.00065113	0.027187	26	1.00737e+227
GO:0003676	nucleic acid binding	molecular_function	0.001023	0.042345	204	100188905,102158443,100511412,100521258,100153815,100511893,100519993,100524201,110256111,100511736,102163932,100154530,100516147,100526025,110258088,100621643,100517738,100628053,100738275,100359352,100519066,100512137,100519135,100156389,100518839,100522863,396718,100514237,100621314,100519629,100154373,102166225,102160785,100156351,100521450,100144419,110255803,100524352,100152052,100151752,10…
GO:0046873	metal ion transmembrane transporter activity	molecular_function	0.0011718	0.048085	42	100626898,100154055,102164234,733643,100625226,100517307,100515887,100737722,100737226,100521138,110261676,100627965,100155015,396718,100621879,100152157,100157034,100624184,100737017,100522174,100625418,397089,100521450,100521346,397293,100512323,100515233,100514784,110256150,100519194,100518274,100737944,100519817,100515017,110257402,100152567,100519680,102157546,102157525,100516296,100521067,1…
GO:0008233	peptidase activity	molecular_function	0.0012107	0.049255	67	100525073,100157589,574058,100511916,397293,100738472,100518325,100626399,100522730,100512987,102162297,100519829,100521067,100523542,100141405,102164926,100625563,100515912,100513495,100524513,100158245,100521201,110256870,100520060,110261028,100515512,445533,100155148,100737226,100153257,100157102,100157832,100156146,100737017,397474,100621902,100513510,100521450,100518441,100623291,100513615,1…
GO:0003993	acid phosphatase activity	molecular_function	0.0014997	0.060496	13	1.00154e+113
GO:0006914	autophagy	biological_process	0.0016008	0.064034	22	1.00737e+188
GO:0043412	macromolecule modification	biological_process	0.0016148	0.064052	94	100621933,100524978,100523723,110259211,100621029,100514624,102162297,110258084,102157525,100624854,110256149,100625536,100152937,100520100,100624664,100153962,100521513,100522294,100515445,100192447,100153595,100511727,100625215,397070,100154222,100515286,100519724,100524966,100512775,100523457,100519640,100522920,100522174,100737722,102157652,100622812,100521238,100157102,100620926,100514374,10…
GO:1901137	carbohydrate derivative biosynthetic process	biological_process	0.0018615	0.073228	29	102161907,100625536,100519890,110258084,100514160,100516296,100154650,397488,100517503,100524978,100153508,100518510,100626898,100736645,100523532,100154844,100739692,100523457,100512775,100157644,100621443,102167611,100513419,414902,100737330,100521513,100153986,100514784,102165253
GO:0007166	cell surface receptor signaling pathway	biological_process	0.0019977	0.076813	19	1.00512e+167
GO:0016788	hydrolase activity, acting on ester bonds	molecular_function	0.002001	0.076813	60	100144587,100153556,102158899,445520,102167043,100737017,100623940,100157832,102166485,100622812,100627436,100514374,100157453,100514151,100157054,100156181,100515887,397181,100152351,100523915,100526026,100521988,100521161,100515873,100034246,100623089,110261151,100738835,102164234,100513900,100517681,100521442,100520687,396825,100155276,100518487,102158590,100523187,100513936,100135678,10051482…
GO:0044421	extracellular region part	cellular_component	0.0020738	0.078971	26	3.97533e+221
GO:0015629	actin cytoskeleton	cellular_component	0.0021246	0.080261	11	3.97373e+89
GO:0009059	macromolecule biosynthetic process	biological_process	0.0022034	0.082341	201	100524352,100156973,100516377,100512323,100622925,110255803,100514784,100152718,100519629,100621902,100621314,100521450,100518441,100156351,100154208,100519603,100739692,100626014,100514160,102158190,100523676,100627661,100520050,100522082,100523293,100525971,100519194,396904,100151752,100152052,100522109,100526025,100516147,100516911,100511736,100511412,102158443,100521258,100511893,396718,10014…
GO:0071855	neuropeptide receptor binding	molecular_function	0.0022142	0.082341	4	1.00524e+35
GO:0010256	endomembrane system organization	biological_process	0.0022646	0.083564	10	1.00516e+83
GO:0006811	ion transport	biological_process	0.0024809	0.09051	74	100626534,397358,100522109,100153986,100625226,100522528,100517680,100515920,641343,100154055,100624184,100526228,396718,100152157,100525577,100286811,100627965,100154525,100515233,100514784,100512323,100157069,397326,100519603,100514526,100155991,100523293,100516296,100620378,110257402,100519890,102157546,397203,100519194,100518274,102161907,100522530,100515887,654416,100523368,102164234,733643,…
GO:0034645	cellular macromolecule biosynthetic process	biological_process	0.0024909	0.09051	199	100511916,100623917,100623100,100525880,100512775,100171399,100515445,100515384,100512817,100737330,110260394,102162297,100155087,654297,100736699,100135678,100524202,100620286,100157532,100513081,100626722,100154830,396825,100514019,100524978,100154844,100524747,100525656,100518049,733643,100157644,100515520,100626723,100520585,100739541,100158102,100624019,110258080,100521411,100127155,10216648…
GO:0015672	monovalent inorganic cation transport	biological_process	0.0025794	0.093015	35	397293,100737330,100515233,100154525,110256150,102161907,100737944,100519194,100518274,106509950,100519817,100152567,100519890,102157546,100519680,100516296,100514526,100626898,100515873,654416,733643,102164234,100523368,100522109,100515887,100153986,100737226,100737722,100627965,100521138,100286811,100525577,100737017,100624184,100522174
GO:1902578	single-organism localization	biological_process	0.0027137	0.097122	125	100737017,110257285,100525195,100522174,100518733,100621879,100157034,100627548,100155015,110259433,100620926,100737226,100737722,100512382,100521138,100520585,100622994,100517307,100515887,110256489,100520060,100518806,654416,396903,733643,100523368,102164234,100158245,100626898,100515873,100519841,100155276,100738346,100154391,100626722,100519842,100152567,110260912,102157525,100510966,10051968…
GO:0098662	inorganic cation transmembrane transport	biological_process	0.0028132	0.098389	25	1.00624e+218
GO:0044249	cellular biosynthetic process	biological_process	0.002824	0.098389	225	396904,100151752,100152052,100525971,100519194,100523676,100523293,100627661,100522082,100520050,100626014,102158190,100516296,100513089,100154208,100519603,100739692,100621902,100621314,100519629,100518441,100521450,100156351,110255803,100514784,100152718,100513615,100524352,100516377,100156973,100512323,100622925,100517738,100628053,449001,100738275,100359352,100519066,100519135,100512137,10015…
GO:0005581	collagen trimer	cellular_component	0.0028318	0.098389	5	3.97533e+38
GO:0052652	cyclic purine nucleotide metabolic process	biological_process	0.0028318	0.098389	5	1.00621e+44
GO:0009893	positive regulation of metabolic process	biological_process	0.0028614	0.098697	19	1.00623e+170
GO:0098660	inorganic ion transmembrane transport	biological_process	0.0030491	0.10442	25	1.00737e+218
GO:0007009	plasma membrane organization	biological_process	0.0030984	0.10534	6	1.00513e+50
GO:0030684	preribosome	cellular_component	0.0031904	0.1077	11	3.96718e+95
GO:0044271	cellular nitrogen compound biosynthetic process	biological_process	0.0033027	0.11071	193	102158443,100521258,100511893,100048943,100516147,100526025,100511736,100516911,100738275,449001,100359352,100519066,100628053,100517738,100147710,100512137,100153508,100519135,100510911,100621902,100519629,100156351,100521450,100518441,100154208,100519603,100512323,100156973,100516377,100524352,100622925,110255803,100152718,100525971,100519194,100152052,100151752,100626014,102158190,100516296,10…
GO:0031325	positive regulation of cellular metabolic process	biological_process	0.003416	0.113	18	1.00152e+161
GO:0005261	cation channel activity	molecular_function	0.0034865	0.113	22	1.00136e+188
GO:0008081	phosphoric diester hydrolase activity	molecular_function	0.0035114	0.113	10	1.00155e+86
GO:0030479	actin cortical patch	cellular_component	0.0035371	0.113	3	1.02161e+26
GO:0030863	cortical cytoskeleton	cellular_component	0.0035371	0.113	3	1.02161e+26
GO:0030864	cortical actin cytoskeleton	cellular_component	0.0035371	0.113	3	1.02161e+26
GO:0061645	endocytic patch	cellular_component	0.0035371	0.113	3	1.02161e+26
GO:0007167	enzyme linked receptor protein signaling pathway	biological_process	0.0035881	0.11311	6	1.00154e+50
GO:0007169	transmembrane receptor protein tyrosine kinase signaling pathway	biological_process	0.0035881	0.11311	6	1.00154e+50
GO:0044423	virion part	cellular_component	0.0037707	0.11808	42	100622139,100153556,100152157,396914,100157832,102166369,100511003,106509839,100736655,100156588,102159930,100519523,100153190,100524201,100515920,100153500,100524513,100738753,100524083,100153673,100521258,100626722,110256581,100519001,100518487,110259211,100522530,100152567,100624664,100152324,100514966,100510996,102158081,102166622,100524645,100519927,100522875,397628,100626399,100520970,10062…
GO:1901576	organic substance biosynthetic process	biological_process	0.0038654	0.11984	227	100519636,100525077,100520683,100523621,100523004,100515600,100525577,102167043,110257485,100513149,100152157,100511968,396709,100157662,100526228,110257406,100156117,100689266,100738753,100518510,100621009,102162472,100627401,100620898,100522528,100153986,100516908,100524569,100524726,110259367,110256621,100511452,100627191,100155702,100515017,102161907,100519890,100517152,100524854,100620215,10…
GO:0019012	virion	cellular_component	0.0038772	0.11984	45	100522530,100152324,100514966,100152567,100624664,110256581,100519001,100626722,100155991,100518487,110259211,100621902,100153219,100520970,102158081,102166622,100524645,100510996,397628,100626399,100519927,100522875,102166369,100736655,100511003,106509839,102158899,100152157,100622139,100153556,100157832,396914,102162776,100153500,100524513,100738753,100515920,100524201,100153673,100521258,10052…
GO:0022836	gated channel activity	molecular_function	0.003965	0.12136	24	1.00515e+206
GO:0006812	cation transport	biological_process	0.0039774	0.12136	53	100624184,100737017,100522174,396718,100621879,100157034,100152157,100155015,100525577,100737226,100737722,100286811,100521138,100627965,397358,100522109,100625226,100153986,100515887,654416,102164234,100523368,733643,100517680,100515873,100626898,100154055,100519841,100514526,100516296,100620378,100519890,100152567,100519680,102157525,102157546,100519194,100518274,100737944,102161907,100519817,1…
GO:0007156	homophilic cell adhesion via plasma membrane adhesion molecules	biological_process	0.0040124	0.12165	11	1.00515e+98
GO:0016779	nucleotidyltransferase activity	molecular_function	0.0041499	0.12475	37	100048960,100151752,100157532,102157525,100155702,100515017,100525971,100514784,100624272,100738472,100517305,100522294,396910,492280,100156351,100621902,100621314,110257285,100513208,100520594,110259364,100737040,100523004,100523621,102166485,595128,102157744,100624019,100158102,102162711,100524726,100526025,100522109,100522528,100623089,100738835,100158245
GO:0098655	cation transmembrane transport	biological_process	0.004167	0.12475	25	6.54416e+218
GO:0060589	nucleoside-triphosphatase regulator activity	molecular_function	0.0044169	0.1314	15	1.00517e+131
GO:0019637	organophosphate metabolic process	biological_process	0.004478	0.13239	34	102161907,100519890,100625536,100516296,100154650,100520687,397488,102158590,102167387,100155583,100625330,100523457,102167611,100521513,100737330,100624272,100521394,102164826,102165253,100152816,100520446,100621582,396914,100517503,100153508,100154844,100620898,100048943,100157644,100157054,100621443,100153250,100153986,110260081
GO:0098772	molecular function regulator	molecular_function	0.004612	0.13551	50	100620812,100152157,100525506,100101552,100524850,100521238,100511786,100515547,100514069,100153986,100154530,100516147,100621167,110258080,100158048,100516911,100158102,110255935,100625238,100522463,100513495,100034246,100513350,100520058,397453,100518447,100517400,100322894,100154830,100521067,397631,100518487,100525075,100515264,100151931,106509950,100523671,100627663,100515404,102157525,10062…
GO:0009056	catabolic process	biological_process	0.0047416	0.13571	43	595126,100623100,100171399,100522875,100153052,100627113,100521394,100152324,396904,100515017,100520687,100155276,100521067,654416,396903,100322894,100623089,102164234,100515873,100135667,110256111,110260081,102158510,100520585,100153250,100135669,100515887,100513419,110258075,100736655,100525077,102157652,100621582,396914,110257406,100101552,100737017,100515712,100624418,100322893,100170769,1006…
GO:0004383	guanylate cyclase activity	molecular_function	0.0047611	0.13571	4	1.00154e+35
GO:0006182	cGMP biosynthetic process	biological_process	0.0047611	0.13571	4	1.00626e+35
GO:0046068	cGMP metabolic process	biological_process	0.0047611	0.13571	4	1.00154e+35
GO:0048013	ephrin receptor signaling pathway	biological_process	0.0047611	0.13571	4	1.00512e+35
GO:0022843	voltage-gated cation channel activity	molecular_function	0.004978	0.14041	12	1.10256e+101
GO:0009058	biosynthetic process	biological_process	0.0051385	0.14041	230	100525577,100523004,100515600,100525077,100523621,100520683,100519636,110257406,100526228,100157662,100511968,396709,100152157,100513149,110257485,102167043,100522528,100620898,100627401,102162472,100621009,100518510,100689266,100738753,100156117,100511452,110259367,110256621,100524726,100516908,100524569,100153986,100517152,100519890,102161907,100627191,100155702,100515017,397488,100518487,10650…
GO:0016307	phosphatidylinositol phosphate kinase activity	molecular_function	0.0051407	0.14041	3	1.0052e+26
GO:0005335	serotonin:sodium symporter activity	molecular_function	0.0051475	0.14041	2	1.00517e+17
GO:0008504	monoamine transmembrane transporter activity	molecular_function	0.0051475	0.14041	2	1.10262e+17
GO:0015222	serotonin transmembrane transporter activity	molecular_function	0.0051475	0.14041	2	1.10262e+17
GO:1901618	organic hydroxy compound transmembrane transporter activity	molecular_function	0.0051475	0.14041	2	1.00517e+17
GO:0005267	potassium channel activity	molecular_function	0.0051621	0.14041	13	7.33643e+110
GO:0006486	protein glycosylation	biological_process	0.0052496	0.14118	10	1.00519e+86
GO:0043413	macromolecule glycosylation	biological_process	0.0052496	0.14118	10	4.14902e+86
GO:0044764	multi-organism cellular process	biological_process	0.0053179	0.14203	44	100515600,100515547,100514069,100627949,100521238,100737226,100621864,106504173,100737777,100518839,102162776,100627548,100522863,445520,102158899,100157034,100525656,100153815,397453,106505859,100524513,110258080,110260403,100520585,100514751,100135669,100515887,100519829,396904,102161907,100518487,100525601,397631,100625290,100737608,100499568,397293,110256142,100519927,100156980,397628,1001571…
GO:0032040	small-subunit processome	cellular_component	0.0053541	0.14203	9	3.96718e+77
GO:0005886	plasma membrane	cellular_component	0.0053709	0.14203	35	100737017,100517503,100510911,100157832,102166950,100153556,100624053,100739769,100737226,100525077,100627965,449001,110261676,100621864,100522109,100517307,100135669,100520060,106508428,100515772,100515873,100154055,100521990,100521067,100624925,100152567,100510966,100157250,102162297,100154380,100518274,100519194,110255474,102166057,100511916
GO:0005234	extracellular-glutamate-gated ion channel activity	molecular_function	0.0059204	0.15548	4	1.0052e+35
GO:0048518	positive regulation of biological process	biological_process	0.0059446	0.15548	27	100518487,110255868,100524854,100170769,100626014,100627548,100152324,100736655,100525077,100516229,100516124,100153052,100153049,100511736,100158102,100158048,100153595,110258080,100622925,100512817,100520585,100037301,100217389,100512323,100623100,100515873,100154222
GO:0005576	extracellular region	cellular_component	0.006182	0.1608	89	106508998,106506400,110258083,100522875,574058,100627336,100126236,100517681,100626722,100154650,100153249,100523723,100524978,100514019,102164926,100525601,100523671,100621029,100519829,100157351,100620286,397323,100524248,100739614,100514751,100624019,110255935,100153522,100523504,733643,100518493,102159686,100322894,396903,100152396,100511316,110257285,102161705,106505131,100515712,100737228,3…
GO:0006163	purine nucleotide metabolic process	biological_process	0.0065965	0.17065	19	1.00626e+170
GO:0034220	ion transmembrane transport	biological_process	0.0068002	0.17497	27	100737330,110260947,100153986,100512323,100154525,100515873,100154055,654416,100523368,102164234,100621879,396718,100516296,100737017,100624184,100155991,100737226,102161907,100519194,100627965,106509950,100521138,100286811,100525577,100519890,100155015,102157546
GO:0044765	single-organism transport	biological_process	0.0068755	0.17595	119	102161907,100519194,397203,100518274,100522530,100519890,110257402,396904,102157546,100157250,100516296,100620378,100514526,397488,100522082,100523293,100155991,396910,397326,100520540,100519603,100513615,100157069,100512323,100515233,100514784,100154525,100519030,396578,397628,100627965,110261676,100516526,100286811,100525577,100622139,396718,100157079,100152157,102167043,100624184,100624671,100…
GO:0016032	viral process	biological_process	0.006916	0.17604	39	102158899,100157034,100627548,102162776,100518839,100521238,100737777,106504173,100514069,100515600,100515547,100627949,100520585,100514751,100515887,100135669,110260403,110258080,106505859,100524513,100153815,100525656,397453,100625290,100737608,100518487,397631,102161907,100519829,396904,100524645,100519927,100156980,100157198,397628,100153595,110256142,100499568,397293
GO:0006164	purine nucleotide biosynthetic process	biological_process	0.0072992	0.18481	14	1.00518e+125
GO:0048522	positive regulation of cellular process	biological_process	0.0074993	0.18887	24	1.00171e+215
GO:0070085	glycosylation	biological_process	0.0075985	0.19036	10	1.00524e+86
GO:0045893	positive regulation of transcription, DNA-templated	biological_process	0.0080221	0.19462	9	1.00626e+80
GO:0045935	positive regulation of nucleobase-containing compound metabolic process	biological_process	0.0080221	0.19462	9	1.00525e+80
GO:0051254	positive regulation of RNA metabolic process	biological_process	0.0080221	0.19462	9	1.10258e+80
GO:1902680	positive regulation of RNA biosynthetic process	biological_process	0.0080221	0.19462	9	1.10258e+80
GO:1903508	positive regulation of nucleic acid-templated transcription	biological_process	0.0080221	0.19462	9	1.00525e+80
GO:0019028	viral capsid	cellular_component	0.0080226	0.19462	31	100522530,100152567,100624664,100511003,100736655,100514966,100152324,100153556,100626722,110256581,100519001,396914,100518487,100157832,100520970,100524201,100515920,100153500,100738753,100153219,100153673,100521258,100510996,100156588,102158081,100524645,100522875,397628,100153190,100626399,100519523
GO:0022804	active transmembrane transporter activity	molecular_function	0.0080548	0.19462	21	1.00517e+179
GO:0015081	sodium ion transmembrane transporter activity	molecular_function	0.0081174	0.19515	14	1.00153e+125
GO:0071840	cellular component organization or biogenesis	biological_process	0.0085145	0.20366	107	100521486,100512018,110258080,110260403,396648,100622994,404693,100520585,100515887,396903,654416,100626866,100153673,102165390,102164234,100515873,100737017,100515712,100322893,100525195,100520594,100521439,407247,100157034,100520606,100627548,100515547,100627949,102157652,100621582,100623035,100512382,100624617,100516124,100522730,110258083,100626399,100525337,100512817,106508998,100524645,3972…
GO:0005201	extracellular matrix structural constituent	molecular_function	0.0088845	0.20936	5	3.97323e+38
GO:0009190	cyclic nucleotide biosynthetic process	biological_process	0.0088845	0.20936	5	1.00621e+44
GO:0009975	cyclase activity	molecular_function	0.0088845	0.20936	5	1.00621e+44
GO:0098742	cell-cell adhesion via plasma-membrane adhesion molecules	biological_process	0.0091181	0.2138	11	1.00515e+98
GO:0072521	purine-containing compound metabolic process	biological_process	0.0092139	0.21499	19	1.1026e+170
GO:0003779	actin binding	molecular_function	0.0095815	0.22041	26	100738346,110261534,100513261,100525195,100524854,100513900,100626014,100152052,102161907,110261080,100156660,100522730,100516911,100513228,100525337,100155536,100520585,100622994,106504190,100153673,100286741,100518510,100739797,100511916,100623827,397007
GO:0044087	regulation of cellular component biogenesis	biological_process	0.0096158	0.22041	7	1.00525e+62
GO:0009101	glycoprotein biosynthetic process	biological_process	0.010003	0.22041	10	1.00737e+86
GO:0016817	hydrolase activity, acting on acid anhydrides	molecular_function	0.010007	0.22041	62	100522382,100514019,397373,100737608,106507781,100521067,100622071,396904,100523668,100049657,100157361,100127131,100516102,102161907,100739347,100144419,102165253,110258083,100514784,100738472,102167611,100625428,397293,396910,100515575,100152536,574058,100155583,100518441,100625418,100157832,100517949,106505131,100157034,110258214,100151812,100517799,396763,100522720,110258336,100525547,1005156…
GO:0001527	microfibril	cellular_component	0.010008	0.22041	2	1.00155e+17
GO:0003919	FMN adenylyltransferase activity	molecular_function	0.010008	0.22041	2	1.00622e+17
GO:0030688	preribosome, small subunit precursor	cellular_component	0.010008	0.22041	2	1.00521e+17
GO:0043205	fibril	cellular_component	0.010008	0.22041	2	1.00155e+17
GO:0044420	extracellular matrix component	cellular_component	0.010008	0.22041	2	1.00513e+17
GO:0009891	positive regulation of biosynthetic process	biological_process	0.010048	0.22041	9	1.00626e+80
GO:0010557	positive regulation of macromolecule biosynthetic process	biological_process	0.010048	0.22041	9	1.10258e+80
GO:0031328	positive regulation of cellular biosynthetic process	biological_process	0.010048	0.22041	9	1.00158e+80
GO:0051173	positive regulation of nitrogen compound metabolic process	biological_process	0.010048	0.22041	9	1.00525e+80
GO:0004435	phosphatidylinositol phospholipase C activity	molecular_function	0.010479	0.22673	4	1.00517e+35
GO:0004629	phospholipase C activity	molecular_function	0.010479	0.22673	4	1.00521e+35
GO:0016799	hydrolase activity, hydrolyzing N-glycosyl compounds	molecular_function	0.010479	0.22673	4	1.00512e+35
GO:0005244	voltage-gated ion channel activity	molecular_function	0.01079	0.23058	13	1.00516e+110
GO:0022832	voltage-gated channel activity	molecular_function	0.01079	0.23058	13	1.00738e+110
GO:0010628	positive regulation of gene expression	biological_process	0.010802	0.23058	9	1.00623e+80
GO:0030001	metal ion transport	biological_process	0.010908	0.23179	37	100514526,100516296,100519680,102157546,102157525,100152567,100519817,100519194,100518274,100737944,110255474,110256150,100514784,100515233,100512323,397293,110260229,397089,100522174,100624184,100737017,100157034,100152157,396718,100621879,100155015,100521138,100627965,100737722,100737226,100625226,100515887,100522109,102164234,733643,100154055,100626898
GO:0072522	purine-containing compound biosynthetic process	biological_process	0.011014	0.23301	14	1.00155e+125
GO:0015079	potassium ion transmembrane transporter activity	molecular_function	0.011368	0.23943	13	7.33643e+110
GO:0044403	symbiosis, encompassing mutualism through parasitism	biological_process	0.011474	0.24061	41	106504173,100737777,100621864,100521238,100627949,100514069,100515600,100515547,102158899,100157034,100627548,102162776,100518839,100524513,106505859,397453,100525656,100153815,100515887,100135669,100514751,100520585,110260403,110258080,102161907,396904,100519829,100737608,100625290,397631,100518487,100525601,110256142,397293,100499568,100524645,100153595,397628,100157198,100156980,100519927
GO:0009150	purine ribonucleotide metabolic process	biological_process	0.011562	0.2408	18	1.00523e+161
GO:0009187	cyclic nucleotide metabolic process	biological_process	0.011585	0.2408	5	1.00621e+44
GO:0070009	serine-type aminopeptidase activity	molecular_function	0.012252	0.25096	3	1.00519e+26
GO:0016791	phosphatase activity	molecular_function	0.012266	0.25096	23	1.00512e+200
GO:0044419	interspecies interaction between organisms	biological_process	0.01229	0.25096	41	100499568,397293,110256142,100519927,100156980,397628,100157198,100153595,100524645,396904,100519829,102161907,100518487,100525601,397631,100625290,100737608,100525656,100153815,397453,106505859,100524513,110258080,110260403,100514751,100520585,100515887,100135669,100514069,100515600,100515547,100627949,100521238,106504173,100621864,100737777,102162776,100518839,102158899,100157034,100627548
GO:0015298	solute:cation antiporter activity	molecular_function	0.01239	0.25096	4	1.00518e+32
GO:0015299	solute:proton antiporter activity	molecular_function	0.01239	0.25096	4	1.0062e+32
GO:0031225	anchored component of membrane	cellular_component	0.01239	0.25096	4	1.00625e+35
GO:0009259	ribonucleotide metabolic process	biological_process	0.012523	0.25151	18	1.00516e+161
GO:0016746	transferase activity, transferring acyl groups	molecular_function	0.012523	0.25151	18	1.00737e+161
GO:0044085	cellular component biogenesis	biological_process	0.012744	0.25488	55	100125375,100512817,110260977,100519379,100524645,100624617,397628,100626399,100738747,102160785,100523302,100499568,100520977,100626722,100521067,100626014,100518487,100738346,100514526,100515017,396904,100515246,100520585,404693,100515887,110260403,100738753,654416,396903,100511985,102165390,102164234,100626866,100511412,100520594,100170769,100520606,100627548,100157034,100518839,100322893,1005…
GO:0019068	virion assembly	biological_process	0.012947	0.25785	10	1.005e+86
GO:0019069	viral capsid assembly	biological_process	0.013404	0.26584	6	1.00518e+53
GO:0009100	glycoprotein metabolic process	biological_process	0.013775	0.2711	10	1.00525e+86
GO:0098609	cell-cell adhesion	biological_process	0.013839	0.2711	11	1.00626e+98
GO:0009152	purine ribonucleotide biosynthetic process	biological_process	0.013922	0.2711	13	1.02162e+116
GO:0017111	nucleoside-triphosphatase activity	molecular_function	0.014149	0.2711	52	100521067,106507781,100622071,100737608,397373,100514019,100522382,102161907,100516102,100127131,100157361,100049657,100523668,396904,100625428,102167611,100738472,100514784,110258083,100144419,102165253,100739347,100518441,574058,100155583,100152536,100515575,396910,100517799,110258214,100151812,100157034,106505131,100625418,100520049,100736982,100525577,100515600,100525547,110258336,100522720,1…
GO:0030042	actin filament depolymerization	biological_process	0.014509	0.2711	4	1.00739e+35
GO:0030834	regulation of actin filament depolymerization	biological_process	0.014509	0.2711	4	1.02161e+35
GO:0030835	negative regulation of actin filament depolymerization	biological_process	0.014509	0.2711	4	1.02161e+35
GO:0030837	negative regulation of actin filament polymerization	biological_process	0.014509	0.2711	4	1.02161e+35
GO:0031333	negative regulation of protein complex assembly	biological_process	0.014509	0.2711	4	1.00525e+35
GO:0032272	negative regulation of protein polymerization	biological_process	0.014509	0.2711	4	1.02161e+35
GO:0051261	protein depolymerization	biological_process	0.014509	0.2711	4	1.00525e+35
GO:0051693	actin filament capping	biological_process	0.014509	0.2711	4	1.02161e+35
GO:1901879	regulation of protein depolymerization	biological_process	0.014509	0.2711	4	1.00525e+35
GO:1901880	negative regulation of protein depolymerization	biological_process	0.014509	0.2711	4	1.00739e+35
GO:0016818	hydrolase activity, acting on acid anhydrides, in phosphorus-containing anhydrides	molecular_function	0.014523	0.2711	55	100516102,102161907,100157361,100049657,100127131,100523668,396904,106507781,100521067,100622071,100737608,100522382,100514019,397373,100155583,574058,100518441,100152536,100515575,396910,102167611,100625428,100738472,110258083,100514784,100739347,100144419,102165253,100520049,100738275,100736982,100515600,100525547,100525577,100522720,110258336,110258214,100517799,100151812,100157034,106505131,1…
GO:0019693	ribose phosphate metabolic process	biological_process	0.014631	0.27205	18	1.00154e+161
GO:0016298	lipase activity	molecular_function	0.014789	0.27392	6	1.00155e+53
GO:0009260	ribonucleotide biosynthetic process	biological_process	0.015353	0.28046	13	1.00154e+116
GO:0046390	ribose phosphate biosynthetic process	biological_process	0.015353	0.28046	13	1.00518e+116
GO:0005665	DNA-directed RNA polymerase II, core complex	cellular_component	0.015437	0.28046	3	1.00525e+26
GO:0008239	dipeptidyl-peptidase activity	molecular_function	0.015437	0.28046	3	1.0062e+26
GO:0031704	apelin receptor binding	molecular_function	0.015437	0.28046	3	1.00524e+26
GO:0006260	DNA replication	biological_process	0.015583	0.28204	31	100737191,100515017,102161092,102166485,100523621,100513153,396904,100157532,100515600,100513149,396718,100521067,100514019,100620215,100523676,100518487,110257406,100621902,100621314,100738753,100511412,100738835,654416,396910,100737330,100522109,100626399,100624019,100154525,100511736,100624272
GO:0008092	cytoskeletal protein binding	molecular_function	0.015934	0.28729	36	100622994,100520585,106504190,100516911,100518510,100739797,397007,654416,396903,102164234,100153673,100525195,100156660,100155286,110258336,100155536,100515614,100525337,100522730,100513228,100511916,100623827,100286741,100513900,100626014,100738346,110261534,100513261,100524854,100514019,102161907,102162297,100516102,110261080,100152052,396904
GO:0034641	cellular nitrogen compound metabolic process	biological_process	0.016211	0.2902	254	100524202,100514820,100135678,654297,100736699,100155087,102162297,100513081,102157525,100157532,100625536,100620286,100154830,100626722,100513900,100514019,396825,100623917,100511916,100155583,100171399,100512775,100525880,100623100,100737330,100154944,100512817,100515445,100515384,110260394,102165253,102157744,100153584,102165197,102166485,100127155,100522720,102158906,100513153,100737040,10052…
GO:0004489	methylenetetrahydrofolate reductase (NAD(P)H) activity	molecular_function	0.016217	0.2902	2	1.00152e+17
GO:0018205	peptidyl-lysine modification	biological_process	0.016845	0.29919	4	1.00144e+32
GO:0043242	negative regulation of protein complex disassembly	biological_process	0.016845	0.29919	4	1.00525e+35
GO:0044281	small molecule metabolic process	biological_process	0.017403	0.30796	52	100521258,100521829,100519103,100048943,100623089,110260081,100513419,100153986,100621443,100157054,100621582,100152816,110257285,102161705,100153508,100517503,396914,102167043,100520594,100513208,100511968,397293,100513371,595126,100512775,100625424,100523457,100521603,100621902,100621314,100625330,100155583,110260394,102164826,102165253,100521394,110255474,100737330,100513615,102167611,10062553…
GO:0006813	potassium ion transport	biological_process	0.017707	0.31137	13	7.33643e+110
GO:0016462	pyrophosphatase activity	molecular_function	0.017727	0.31137	52	100739347,102165253,100144419,110258083,100514784,100738472,102167611,100625428,396910,100515575,100152536,574058,100155583,100518441,100514019,100522382,397373,100737608,106507781,100622071,100521067,396904,100523668,100049657,100157361,100127131,100516102,102161907,100158102,100625226,106507446,100515512,100156588,100521829,396903,100521353,100135667,100515873,100158245,100625418,106505131,1001…
GO:0070008	serine-type exopeptidase activity	molecular_function	0.017853	0.31242	6	1.00516e+53
GO:0005975	carbohydrate metabolic process	biological_process	0.018258	0.31271	35	100524978,110258084,396904,100514784,100521394,102164826,100627113,100524352,100156973,100512775,100739692,100144518,100736645,100153556,100522920,102159414,106509839,100517774,110260081,100153250,396648,100154530,414902,100513419,100523928,100516289,100144589,100233182,100511893,100738835,100524201,100518510,100515873,100511556,100523532
GO:0004620	phospholipase activity	molecular_function	0.01855	0.31271	5	1.00521e+44
GO:0008064	regulation of actin polymerization or depolymerization	biological_process	0.01855	0.31271	5	1.00157e+44
GO:0008154	actin polymerization or depolymerization	biological_process	0.01855	0.31271	5	1.00516e+44
GO:0030041	actin filament polymerization	biological_process	0.01855	0.31271	5	1.02161e+44
GO:0030832	regulation of actin filament length	biological_process	0.01855	0.31271	5	1.00525e+44
GO:0030833	regulation of actin filament polymerization	biological_process	0.01855	0.31271	5	1.00516e+44
GO:0032535	regulation of cellular component size	biological_process	0.01855	0.31271	5	1.00525e+44
GO:0032956	regulation of actin cytoskeleton organization	biological_process	0.01855	0.31271	5	1.00525e+44
GO:0032970	regulation of actin filament-based process	biological_process	0.01855	0.31271	5	1.00516e+44
GO:0008417	fucosyltransferase activity	molecular_function	0.019043	0.31271	3	1.00513e+26
GO:0015097	mercury ion transmembrane transporter activity	molecular_function	0.019043	0.31271	3	3.97089e+23
GO:0015694	mercury ion transport	biological_process	0.019043	0.31271	3	3.97089e+23
GO:0034212	peptide N-acetyltransferase activity	molecular_function	0.019043	0.31271	3	1.00144e+26
GO:0046689	response to mercury ion	biological_process	0.019043	0.31271	3	3.97089e+23
GO:0050787	detoxification of mercury ion	biological_process	0.019043	0.31271	3	3.97089e+23
GO:0061733	peptide-lysine-N-acetyltransferase activity	molecular_function	0.019043	0.31271	3	1.00737e+26
GO:0046488	phosphatidylinositol metabolic process	biological_process	0.019052	0.31271	8	1.02167e+68
GO:0008238	exopeptidase activity	molecular_function	0.019187	0.31386	11	1.00516e+95
GO:0007224	smoothened signaling pathway	biological_process	0.019402	0.31629	4	1.10259e+35
GO:0009896	positive regulation of catabolic process	biological_process	0.019624	0.31665	9	1.00153e+80
GO:0010508	positive regulation of autophagy	biological_process	0.019624	0.31665	9	1.00516e+80
GO:0031331	positive regulation of cellular catabolic process	biological_process	0.019624	0.31665	9	1.00153e+80
GO:0004114	3',5'-cyclic-nucleotide phosphodiesterase activity	molecular_function	0.020642	0.33084	5	1.00136e+41
GO:0016849	phosphorus-oxygen lyase activity	molecular_function	0.020642	0.33084	5	1.00621e+44
GO:0006364	rRNA processing	biological_process	0.020854	0.332	9	1.00521e+80
GO:0016072	rRNA metabolic process	biological_process	0.020854	0.332	9	1.00521e+80
GO:0016043	cellular component organization	biological_process	0.021244	0.33708	98	110261676,106504173,100156660,100516526,100286811,100627965,100516229,100736655,100515628,100170769,100519135,102158777,100518839,100738753,100518510,100188905,100511412,100511985,100516289,100157054,100516147,100516911,110261080,100515246,396904,100152052,100626014,100516296,100524854,767626,100620215,100518487,110261534,100513261,100514526,100154500,102160785,100499568,100523302,100516377,10051…
GO:0016747	transferase activity, transferring acyl groups other than amino-acyl groups	molecular_function	0.021413	0.33812	12	1.00145e+107
GO:0006807	nitrogen compound metabolic process	biological_process	0.021452	0.33812	263	100516147,100526025,100511412,100521258,100510911,100153508,100519135,100147710,100623891,100519066,100152718,100622925,100519603,100154208,100156351,100518441,100621314,100519629,100625330,100154373,100523293,102158190,110257402,100151752,396904,100519194,100525971,100158102,100521411,100511966,100515887,100524747,100518049,100626898,106509842,100515712,100517503,100517221,100513208,100737040,10…
GO:0051179	localization	biological_process	0.022092	0.34513	155	110257285,100522174,100737017,110259224,100157034,100621879,100620926,110259433,100737226,100737722,100519523,100518806,110256489,100520060,396903,654416,100515873,100155276,100154391,100737608,100521067,100510966,110260912,100152567,100513162,100519817,110255474,106506400,100522875,100520199,100513827,110260947,100524645,397293,106505385,100152536,100521346,397089,100526228,100624671,100624184,1…
GO:0005249	voltage-gated potassium channel activity	molecular_function	0.022139	0.34513	9	1.00516e+74
GO:0004616	phosphogluconate dehydrogenase (decarboxylating) activity	molecular_function	0.022187	0.34513	4	1.00621e+32
GO:0051494	negative regulation of cytoskeleton organization	biological_process	0.022187	0.34513	4	1.00525e+35
GO:0033043	regulation of organelle organization	biological_process	0.022373	0.3469	11	1.02162e+95
GO:0019058	viral life cycle	biological_process	0.022838	0.35295	24	1.005e+203
GO:0031341	regulation of cell killing	biological_process	0.023653	0.36436	2	1.00154e+17
GO:0043565	sequence-specific DNA binding	molecular_function	0.023979	0.36819	34	106510450,100736699,100513936,100155087,100520050,100518487,100154830,100627336,100525880,100512353,102160500,100520199,100524645,100524352,100515384,100513153,100517738,100515547,100519636,100519135,110260886,396709,100511412,100524747,654416,100738753,100621009,102162711,100511736,110259367,100158102,100739541,102163932,100626723
GO:0010467	gene expression	biological_process	0.024425	0.37383	194	100739541,100626723,100520585,110258080,100521411,100158102,100515520,733643,100518049,100524747,100525656,100520594,100517221,100156146,106509842,100515712,100153584,102165197,100127155,102158906,100513153,100737040,100737330,100154944,100512817,100515384,100515445,110260394,100623917,100516442,100511916,100171399,100525880,100623100,100154830,100626722,100514019,110255868,396825,100135678,10052…
GO:0009117	nucleotide metabolic process	biological_process	0.025009	0.38119	21	1.00523e+188
GO:0001906	cell killing	biological_process	0.025202	0.38119	4	1.00622e+35
GO:0005242	inward rectifier potassium channel activity	molecular_function	0.025202	0.38119	4	1.00522e+32
GO:0051235	maintenance of location	biological_process	0.025226	0.38119	6	1.00157e+53
GO:0015078	hydrogen ion transmembrane transporter activity	molecular_function	0.025676	0.38677	20	1.00518e+167
GO:0051016	barbed-end actin filament capping	biological_process	0.02753	0.41209	3	1.00739e+26
GO:0070588	calcium ion transmembrane transport	biological_process	0.02753	0.41209	3	1.00155e+23
GO:0016469	proton-transporting two-sector ATPase complex	cellular_component	0.027815	0.41504	14	1.00737e+122
GO:0005231	excitatory extracellular ligand-gated ion channel activity	molecular_function	0.028453	0.41672	4	1.0052e+35
GO:0005326	neurotransmitter transporter activity	molecular_function	0.028453	0.41672	4	1.00521e+35
GO:0005328	neurotransmitter:sodium symporter activity	molecular_function	0.028453	0.41672	4	1.00517e+35
GO:0032507	maintenance of protein location in cell	biological_process	0.028453	0.41672	4	1.00624e+35
GO:0045185	maintenance of protein location	biological_process	0.028453	0.41672	4	1.00511e+35
GO:0051651	maintenance of location in cell	biological_process	0.028453	0.41672	4	1.00511e+35
GO:0016782	transferase activity, transferring sulfur-containing groups	molecular_function	0.029335	0.42832	7	1.00511e+62
GO:0016042	lipid catabolic process	biological_process	0.029575	0.4292	6	1.00623e+50
GO:0016459	myosin complex	cellular_component	0.029575	0.4292	6	1.00737e+44
GO:0016798	hydrolase activity, acting on glycosyl bonds	molecular_function	0.030235	0.43744	17	1.00157e+152
GO:0044248	cellular catabolic process	biological_process	0.031273	0.44203	33	100627113,100522875,100153052,100171399,595126,100623100,100521067,100520687,100515017,100152324,396904,100135669,100515887,100513419,100520585,110256111,102158510,100515873,102164234,654416,396903,100627548,100152157,100170769,100322893,110257406,100737017,100515712,100621582,102157652,100525077,100736655,110258075
GO:0001664	G-protein coupled receptor binding	molecular_function	0.031361	0.44203	7	1.00524e+62
GO:0006650	glycerophospholipid metabolic process	biological_process	0.031652	0.44203	8	1.00158e+68
GO:0006766	vitamin metabolic process	biological_process	0.031924	0.44203	6	1.10255e+53
GO:0006767	water-soluble vitamin metabolic process	biological_process	0.031924	0.44203	6	1.10255e+53
GO:0030955	potassium ion binding	molecular_function	0.031924	0.44203	6	1.00516e+50
GO:0031420	alkali metal ion binding	molecular_function	0.031924	0.44203	6	1.00516e+50
GO:0009271	phage shock	biological_process	0.031941	0.44203	4	1.00155e+35
GO:0098586	cellular response to virus	biological_process	0.031941	0.44203	4	1.00512e+35
GO:0007016	cytoskeletal anchoring at plasma membrane	biological_process	0.032201	0.44203	2	1.00157e+17
GO:0008645	hexose transport	biological_process	0.032201	0.44203	2	1.10256e+17
GO:0010827	regulation of glucose transport	biological_process	0.032201	0.44203	2	1.10256e+17
GO:0010829	negative regulation of glucose transport	biological_process	0.032201	0.44203	2	1.10256e+17
GO:0015758	glucose transport	biological_process	0.032201	0.44203	2	1.10256e+17
GO:0046323	glucose import	biological_process	0.032201	0.44203	2	1.00155e+17
GO:0046324	regulation of glucose import	biological_process	0.032201	0.44203	2	1.10256e+17
GO:0046325	negative regulation of glucose import	biological_process	0.032201	0.44203	2	1.00155e+17
GO:0016125	sterol metabolic process	biological_process	0.032409	0.44203	3	1.00522e+26
GO:0061687	detoxification of inorganic compound	biological_process	0.032409	0.44203	3	1.00515e+23
GO:0098754	detoxification	biological_process	0.032409	0.44203	3	1.02158e+23
GO:0006753	nucleoside phosphate metabolic process	biological_process	0.032603	0.44341	21	1.0052e+188
GO:0022607	cellular component assembly	biological_process	0.033925	0.46006	46	100515887,100520585,404693,100738753,102165390,102164234,100511412,100511985,654416,396903,100627548,100520606,100157034,100170769,100519135,100525195,100322893,100518839,106504173,100516526,100286811,100512382,100627965,100621582,100516229,100736655,100627949,100515547,100519379,100524645,100512817,100125375,110260977,397628,100624617,102160785,100523302,100499568,100626014,100521067,100626722,1…
GO:0006816	calcium ion transport	biological_process	0.036417	0.48921	5	1.00155e+41
GO:0032271	regulation of protein polymerization	biological_process	0.036417	0.48921	5	1.00516e+44
GO:0043254	regulation of protein complex assembly	biological_process	0.036417	0.48921	5	1.00525e+44
GO:0006810	transport	biological_process	0.036485	0.48921	146	102157525,100152324,100519680,100519842,106509950,100737944,100522382,100738346,100626722,100512648,574058,110260229,110256150,100625160,110258083,100152591,100737330,100155015,100512382,100521138,110260000,100525195,100518733,100515712,100627548,110258214,100520594,733643,100523368,102164234,110261225,100519841,100158245,100626898,100515887,100517307,100520585,100622994,396904,100157250,11025740…
GO:0001907	killing by symbiont of host cells	biological_process	0.037707	0.49719	3	1.00526e+26
GO:0004198	calcium-dependent cysteine-type endopeptidase activity	molecular_function	0.037707	0.49719	3	1.00626e+26
GO:0044004	disruption by symbiont of host cell	biological_process	0.037707	0.49719	3	1.00526e+26
GO:0048308	organelle inheritance	biological_process	0.037707	0.49719	3	6.54416e+23
GO:0048309	endoplasmic reticulum inheritance	biological_process	0.037707	0.49719	3	1.00152e+23
GO:1990267	response to transition metal nanoparticle	biological_process	0.037707	0.49719	3	3.97089e+23
GO:0015297	antiporter activity	molecular_function	0.039636	0.52036	4	1.0062e+32
GO:0008080	N-acetyltransferase activity	molecular_function	0.039683	0.52036	6	1.00049e+53
GO:0051234	establishment of localization	biological_process	0.039796	0.52041	147	100620926,110259433,100737722,100737226,100737017,110257285,100522174,100621879,100157034,110259224,110256489,100520060,100518806,396903,654416,100515873,100152567,100513162,110260912,100519817,100155276,100154391,100521067,100737608,397293,106505385,397089,100152536,100521346,106506400,100520199,100522875,110255474,110260947,100524645,100525577,100525547,100525077,110261676,100624184,100624671,1…
GO:0005938	cell cortex	cellular_component	0.040184	0.5232	9	3.96904e+77
GO:0004674	protein serine/threonine kinase activity	molecular_function	0.040229	0.5232	16	1.00626e+140
GO:0006771	riboflavin metabolic process	biological_process	0.041756	0.52796	2	1.00513e+17
GO:0009231	riboflavin biosynthetic process	biological_process	0.041756	0.52796	2	1.00513e+17
GO:0042726	flavin-containing compound metabolic process	biological_process	0.041756	0.52796	2	1.00622e+17
GO:0042727	flavin-containing compound biosynthetic process	biological_process	0.041756	0.52796	2	1.00622e+17
GO:0016762	xyloglucan:xyloglucosyl transferase activity	molecular_function	0.042037	0.52796	1	100154530
GO:0019799	tubulin N-acetyltransferase activity	molecular_function	0.042037	0.52796	1	100144480
GO:0031854	orexigenic neuropeptide QRFP receptor binding	molecular_function	0.042037	0.52796	1	100524361
GO:0032865	ERMES complex	cellular_component	0.042037	0.52796	1	100521486
GO:0044232	organelle membrane contact site	cellular_component	0.042037	0.52796	1	100521486
GO:0044233	ER-mitochondrion membrane contact site	cellular_component	0.042037	0.52796	1	100521486
GO:0047200	tetrahydrodipicolinate N-acetyltransferase activity	molecular_function	0.042037	0.52796	1	100156181
GO:0048046	apoplast	cellular_component	0.042037	0.52796	1	100154530
GO:0071929	alpha-tubulin acetylation	biological_process	0.042037	0.52796	1	100144480
GO:0090407	organophosphate biosynthetic process	biological_process	0.042289	0.52835	20	1.00155e+176
GO:0031329	regulation of cellular catabolic process	biological_process	0.042477	0.52835	11	1.00628e+95
GO:0008146	sulfotransferase activity	molecular_function	0.042512	0.52835	6	1.00738e+53
GO:0010639	negative regulation of organelle organization	biological_process	0.042512	0.52835	6	1.02161e+50
GO:0004112	cyclic-nucleotide phosphodiesterase activity	molecular_function	0.042958	0.53127	5	3.96825e+41
GO:0003688	DNA replication origin binding	molecular_function	0.043417	0.53127	3	1.00518e+26
GO:0008242	omega peptidase activity	molecular_function	0.043417	0.53127	3	1.00158e+23
GO:0018342	protein prenylation	biological_process	0.043417	0.53127	3	1.00737e+26
GO:0019033	viral tegument	cellular_component	0.043417	0.53127	3	1.0052e+26
GO:0097354	prenylation	biological_process	0.043417	0.53127	3	1.00621e+26
GO:0051049	regulation of transport	biological_process	0.043845	0.53445	4	1.10255e+35
GO:0065008	regulation of biological quality	biological_process	0.043901	0.53445	36	100525195,100623940,100157034,396718,100736655,100514374,100511783,100621864,100156660,100516229,100521238,100158048,110260403,100623287,100511412,396903,100738753,100521161,100523504,100518487,100525601,100737608,100626722,100521067,100510966,100515246,100155133,100515017,100621029,100626354,397628,100153595,100037301,106508998,102160785,100521450
GO:0046486	glycerolipid metabolic process	biological_process	0.044197	0.53668	8	1.0052e+68
GO:0090066	regulation of anatomical structure size	biological_process	0.045465	0.54958	6	1.00525e+53
GO:0019079	viral genome replication	biological_process	0.045491	0.54958	7	1.00625e+59
GO:0043623	cellular protein complex assembly	biological_process	0.046453	0.55585	21	1.00511e+176
GO:0010506	regulation of autophagy	biological_process	0.046453	0.55585	9	1.00153e+80
GO:1902589	single-organism organelle organization	biological_process	0.046472	0.55585	30	100516377,100512817,100157054,100520585,100525337,100515614,110258080,110260205,100512018,100154500,100738753,102160785,100515873,396903,100737608,100626014,100157034,100516296,767626,100620215,100525195,100737017,100156660,110261676,100627965,102157652,102162297,100516229,100736655,100510966
GO:0008408	3'-5' exonuclease activity	molecular_function	0.046477	0.55585	5	1.00737e+41
GO:0009165	nucleotide biosynthetic process	biological_process	0.048099	0.57238	14	1.00626e+125
GO:1901293	nucleoside phosphate biosynthetic process	biological_process	0.048099	0.57238	14	1.00049e+125
GO:0007219	Notch signaling pathway	biological_process	0.048295	0.57327	4	1.0062e+35
GO:0015291	secondary active transmembrane transporter activity	molecular_function	0.049014	0.57574	8	1.00517e+68
GO:0060429	epithelium development	biological_process	0.049014	0.57574	8	1.10256e+68
GO:0000275	mitochondrial proton-transporting ATP synthase complex, catalytic core F(1)	cellular_component	0.049531	0.57574	3	1.02168e+26
GO:0008318	protein prenyltransferase activity	molecular_function	0.049531	0.57574	3	1.00621e+26
GO:0044780	bacterial-type flagellum assembly	biological_process	0.049531	0.57574	3	1.00521e+26
GO:0051818	disruption of cells of other organism involved in symbiotic interaction	biological_process	0.049531	0.57574	3	1.00622e+26
GO:0051883	killing of cells in other organism involved in symbiotic interaction	biological_process	0.049531	0.57574	3	1.00154e+26
GO:0015276	ligand-gated ion channel activity	molecular_function	0.049703	0.57574	12	1.00516e+101
GO:0022834	ligand-gated channel activity	molecular_function	0.049703	0.57574	12	3.97293e+101
GO:0042254	ribosome biogenesis	biological_process	0.049712	0.57574	10	1.00624e+89
GO:0009894	regulation of catabolic process	biological_process	0.049979	0.5767	11	1.02158e+95
GO:0044255	cellular lipid metabolic process	biological_process	0.050396	0.5767	19	1.00514e+161
GO:0016407	acetyltransferase activity	molecular_function	0.051746	0.5767	6	1.00049e+53
GO:0006473	protein acetylation	biological_process	0.052218	0.5767	2	1.00144e+17
GO:0006475	internal protein amino acid acetylation	biological_process	0.052218	0.5767	2	1.00144e+17
GO:0007586	digestion	biological_process	0.052218	0.5767	2	1.00102e+17
GO:0015099	nickel cation transmembrane transporter activity	molecular_function	0.052218	0.5767	2	1.00516e+17
GO:0015675	nickel cation transport	biological_process	0.052218	0.5767	2	1.00516e+17
GO:0015749	monosaccharide transport	biological_process	0.052218	0.5767	2	1.00155e+17
GO:0018393	internal peptidyl-lysine acetylation	biological_process	0.052218	0.5767	2	1.00144e+17
GO:0018394	peptidyl-lysine acetylation	biological_process	0.052218	0.5767	2	1.0062e+17
GO:0030284	estrogen receptor activity	molecular_function	0.052218	0.5767	2	1.00512e+17
GO:0031304	intrinsic component of mitochondrial inner membrane	cellular_component	0.052218	0.5767	2	1.06509e+17
GO:0031305	integral component of mitochondrial inner membrane	cellular_component	0.052218	0.5767	2	1.06509e+17
GO:0032592	integral component of mitochondrial membrane	cellular_component	0.052218	0.5767	2	1.00525e+17
GO:0033130	acetylcholine receptor binding	molecular_function	0.052218	0.5767	2	1.00516e+17
GO:0035444	nickel cation transmembrane transport	biological_process	0.052218	0.5767	2	1.00512e+17
GO:0043495	protein anchor	molecular_function	0.052218	0.5767	2	1.00516e+17
GO:0043543	protein acylation	biological_process	0.052218	0.5767	2	1.0062e+17
GO:0098573	intrinsic component of mitochondrial membrane	cellular_component	0.052218	0.5767	2	1.06509e+17
GO:0006836	neurotransmitter transport	biological_process	0.052984	0.58246	4	1.10262e+35
GO:0009066	aspartate family amino acid metabolic process	biological_process	0.052984	0.58246	4	1.10257e+35
GO:0006814	sodium ion transport	biological_process	0.054046	0.59162	11	1.00522e+98
GO:0006644	phospholipid metabolic process	biological_process	0.054067	0.59162	10	1.00158e+86
GO:1902600	hydrogen ion transmembrane transport	biological_process	0.054432	0.59426	13	1.00516e+113
GO:0010604	positive regulation of macromolecule metabolic process	biological_process	0.055778	0.60752	9	1.10258e+80
GO:0030337	DNA polymerase processivity factor activity	molecular_function	0.05604	0.60752	3	1.00514e+23
GO:0045202	synapse	cellular_component	0.05604	0.60752	3	1.00627e+26
GO:0007010	cytoskeleton organization	biological_process	0.056251	0.60752	31	100513261,110261534,100738346,100737017,100524854,100525195,100513900,100626014,100157034,100152052,396904,100510966,100516229,102162297,100156660,110261080,100627965,100516911,110260205,100522730,100622994,100520585,100515614,100155536,100153673,100511916,100518510,100154500,102160785,100623827,100738753
GO:0044712	single-organism catabolic process	biological_process	0.056316	0.60752	13	1.00623e+110
GO:0008270	zinc ion binding	molecular_function	0.056413	0.60752	87	102162297,100153895,100627428,100737299,100513081,100154830,100525601,100523542,100514019,100157589,100513723,100525073,100620912,100518325,100517305,100738472,100153049,100153257,100127155,102166485,100337670,100623035,100157102,102158906,100512105,100152396,102159363,110260886,100627548,100515712,100156146,102161705,110257285,100522673,100513495,100518806,110257384,654416,100738835,100511726,10…
GO:0008948	oxaloacetate decarboxylase activity	molecular_function	0.056866	0.60828	7	1.00519e+62
GO:0035725	sodium ion transmembrane transport	biological_process	0.056866	0.60828	7	1.00519e+62
GO:0071436	sodium ion export	biological_process	0.056866	0.60828	7	1.00519e+62
GO:0005525	GTP binding	molecular_function	0.059779	0.638	29	110258338,100625226,100515512,100144419,110258083,100625238,100521353,100135667,100152536,100515873,100158245,100624668,100516289,396910,100515575,100048943,100621933,100620812,100157034,100737608,100151812,110258214,106505131,100157361,100049657,100522636,100520049,100522720,100523668
GO:0051258	protein polymerization	biological_process	0.060551	0.64479	11	1.00525e+92
GO:0032501	multicellular organismal process	biological_process	0.061008	0.64821	48	397533,100217389,106508998,100037301,100620481,100516124,110258083,100519030,110255474,397628,100154222,100519603,100519724,100626722,100516296,102164926,100525601,100518487,100514019,100621029,100521775,397323,100515246,100623287,100158048,110256137,100524201,100523504,100738753,100516268,100322894,102162152,396903,100511412,733643,102159686,100524762,100152396,100522743,396718,102159363,1001535…
GO:0016887	ATPase activity	molecular_function	0.061855	0.64995	25	1.00516e+215
GO:0009110	vitamin biosynthetic process	biological_process	0.062214	0.64995	5	1.00513e+44
GO:0042364	water-soluble vitamin biosynthetic process	biological_process	0.062214	0.64995	5	1.00513e+44
GO:0003810	protein-glutamine gamma-glutamyltransferase activity	molecular_function	0.062932	0.64995	3	1.10261e+26
GO:0018149	peptide cross-linking	biological_process	0.062932	0.64995	3	1.00156e+26
GO:0009235	cobalamin metabolic process	biological_process	0.063076	0.64995	4	1.00627e+35
GO:0006631	fatty acid metabolic process	biological_process	0.063159	0.64995	7	1.02167e+56
GO:0004564	beta-fructofuranosidase activity	molecular_function	0.063493	0.64995	2	1.00511e+17
GO:0004575	sucrose alpha-glucosidase activity	molecular_function	0.063493	0.64995	2	1.0062e+17
GO:0009225	nucleotide-sugar metabolic process	biological_process	0.063493	0.64995	2	1.00625e+17
GO:0015926	glucosidase activity	molecular_function	0.063493	0.64995	2	1.00511e+17
GO:0031344	regulation of cell projection organization	biological_process	0.063493	0.64995	2	1.00513e+17
GO:0051051	negative regulation of transport	biological_process	0.063493	0.64995	2	1.10256e+17
GO:0060491	regulation of cell projection assembly	biological_process	0.063493	0.64995	2	1.00626e+17
GO:0090599	alpha-glucosidase activity	molecular_function	0.063493	0.64995	2	1.0062e+17
GO:1902115	regulation of organelle assembly	biological_process	0.063493	0.64995	2	1.00513e+17
GO:1902208	regulation of bacterial-type flagellum assembly	biological_process	0.063493	0.64995	2	1.00513e+17
GO:0046034	ATP metabolic process	biological_process	0.066061	0.67478	12	1.0052e+107
GO:0030029	actin filament-based process	biological_process	0.066457	0.67558	7	1.00525e+62
GO:0030036	actin cytoskeleton organization	biological_process	0.066457	0.67558	7	1.00525e+62
GO:0033179	proton-transporting V-type ATPase, V0 domain	cellular_component	0.066564	0.67558	5	6.54416e+41
GO:0001071	nucleic acid binding transcription factor activity	molecular_function	0.068024	0.68746	49	100623917,100626399,100156980,100520199,100512323,100524352,100737330,100524645,100514933,106510450,100736699,100155087,100514019,100523676,100154830,100626722,100738835,733643,100524747,654416,100738753,102162711,110259367,100158102,110256621,100511452,100515633,100516908,654299,100520585,100626723,100620926,100513153,100515547,100628053,100517738,100525577,100521138,100153584,100520683,10215765…
GO:0003700	transcription factor activity, sequence-specific DNA binding	molecular_function	0.068024	0.68746	49	100154830,100626722,100514019,100523676,100736699,100155087,106510450,100512323,100524645,100737330,100524352,100514933,100626399,100156980,100520199,100623917,100513149,110260886,100147710,396709,100519135,100156146,110257406,100521138,100153584,102157652,100127155,100520683,100620926,100513153,100515547,100525577,100628053,100517738,100516908,654299,100520585,100626723,102162711,110259367,10015…
GO:0006629	lipid metabolic process	biological_process	0.068467	0.68762	29	102164826,100515233,100624272,397296,100513615,100622165,100521513,100157644,100521829,100623089,100322894,100513371,100512775,595126,100154844,100621314,102167387,100521161,102158590,397488,100520687,100101552,100155276,100623940,396914,102167043,100511968,100516581,100520446
GO:0006066	alcohol metabolic process	biological_process	0.068473	0.68762	4	1.02165e+35
GO:0043244	regulation of protein complex disassembly	biological_process	0.068473	0.68762	4	1.00157e+35
GO:0051129	negative regulation of cellular component organization	biological_process	0.069655	0.69655	6	1.00157e+50
GO:0051493	regulation of cytoskeleton organization	biological_process	0.069655	0.69655	6	1.00739e+53
GO:0015085	calcium ion transmembrane transporter activity	molecular_function	0.069858	0.69701	7	1.00625e+59
GO:0004197	cysteine-type endopeptidase activity	molecular_function	0.069994	0.69701	11	1.00738e+95
GO:0008373	sialyltransferase activity	molecular_function	0.070195	0.69756	3	1.00513e+26
GO:0051704	multi-organism process	biological_process	0.071213	0.7062	78	106506400,100519927,110258083,100153595,100157198,106508998,100524645,397293,100627336,100511916,102164926,100525601,100153249,100523723,100517681,100521067,100625290,100737608,100519829,100523671,110258080,110260403,100514751,100520585,100515887,100144589,100525656,733643,397453,102164234,100155237,106505859,100524513,110255935,110257285,100152396,445520,100157034,100627548,100514069,100515547,1…
GO:0009888	tissue development	biological_process	0.071901	0.71153	9	1.00518e+77
GO:0006818	hydrogen transport	biological_process	0.072981	0.71923	13	1.00526e+113
GO:0015992	proton transport	biological_process	0.072981	0.71923	13	1.02164e+113
GO:0032561	guanyl ribonucleotide binding	molecular_function	0.07381	0.7259	29	100049657,100157361,100522636,100520049,100522720,100523668,100621933,100620812,100737608,100157034,110258214,100151812,106505131,100625238,100521353,100135667,100152536,100515873,100158245,100624668,396910,100515575,100048943,100516289,110258338,100625226,100515512,100144419,110258083
GO:0009636	response to toxic substance	biological_process	0.0741	0.72725	4	3.97089e+32
GO:0006996	organelle organization	biological_process	0.075028	0.73485	58	100516377,100512817,106508998,100155536,100525337,100515614,110260205,100522730,100516124,100154500,102160785,100623827,100511916,100626014,100737608,100516296,100513900,100524854,100620215,767626,110261534,100513261,100738346,100514820,110261080,102162297,396904,100152324,100510966,100152052,100622994,100520585,100516147,100157054,110258080,100516911,100512018,100521486,100738753,100515873,10051…
GO:0008519	ammonium transmembrane transporter activity	molecular_function	0.075495	0.73645	2	1.00517e+17
GO:0006505	GPI anchor metabolic process	biological_process	0.075758	0.73645	5	1.00522e+41
GO:0019001	guanyl nucleotide binding	molecular_function	0.076588	0.73645	29	100624668,100515575,396910,100048943,100516289,100152536,100625238,100135667,100521353,100158245,100515873,100144419,110258083,110258338,100625226,100515512,100522720,100523668,100522636,100049657,100157361,100520049,106505131,100737608,100157034,100621933,100620812,100151812,110258214
GO:0001816	cytokine production	biological_process	0.077817	0.73645	3	1.00158e+26
GO:0001817	regulation of cytokine production	biological_process	0.077817	0.73645	3	1.00158e+26
GO:0001819	positive regulation of cytokine production	biological_process	0.077817	0.73645	3	1.00158e+26
GO:0004601	peroxidase activity	molecular_function	0.077817	0.73645	3	1.00515e+26
GO:0010038	response to metal ion	biological_process	0.077817	0.73645	3	1.00515e+23
GO:0031640	killing of cells of other organism	biological_process	0.077817	0.73645	3	1.00526e+26
GO:0044364	disruption of cells of other organism	biological_process	0.077817	0.73645	3	1.00526e+26
GO:0008083	growth factor activity	molecular_function	0.077855	0.73645	9	1.00287e+77
GO:0015988	energy coupled proton transmembrane transport, against electrochemical gradient	biological_process	0.078098	0.73645	8	1.00526e+68
GO:0015991	ATP hydrolysis coupled proton transport	biological_process	0.078098	0.73645	8	1.0651e+68
GO:0043933	macromolecular complex subunit organization	biological_process	0.079074	0.73645	37	654416,396903,100511985,102165390,100188905,102164234,100511412,100738753,110258080,100736655,100516229,100516526,100286811,100627965,100512382,100518839,100525195,100170769,100520606,100157034,100154500,102160785,100624617,397628,110260977,100516377,100519379,396904,100515246,100518487,100514526,100738346,767626,100620215,100516296,100626722,100521067
GO:0022613	ribonucleoprotein complex biogenesis	biological_process	0.079569	0.73645	10	1.00623e+89
GO:0006402	mRNA catabolic process	biological_process	0.079953	0.73645	4	1.00627e+35
GO:0010035	response to inorganic substance	biological_process	0.079953	0.73645	4	3.97089e+32
GO:0007015	actin filament organization	biological_process	0.0806	0.73645	5	1.00516e+44
GO:0045892	negative regulation of transcription, DNA-templated	biological_process	0.0806	0.73645	5	1.06508e+44
GO:0051253	negative regulation of RNA metabolic process	biological_process	0.0806	0.73645	5	1.00156e+44
GO:1902679	negative regulation of RNA biosynthetic process	biological_process	0.0806	0.73645	5	1.06508e+44
GO:1903507	negative regulation of nucleic acid-templated transcription	biological_process	0.0806	0.73645	5	1.06508e+44
GO:0019898	extrinsic component of membrane	cellular_component	0.081473	0.73645	8	1.00152e+62
GO:0001726	ruffle	cellular_component	0.082309	0.73645	1	100156660
GO:0004827	proline-tRNA ligase activity	molecular_function	0.082309	0.73645	1	110260394
GO:0004833	tryptophan 2,3-dioxygenase activity	molecular_function	0.082309	0.73645	1	100513419
GO:0006433	prolyl-tRNA aminoacylation	biological_process	0.082309	0.73645	1	110260394
GO:0008773	[protein-PII] uridylyltransferase activity	molecular_function	0.082309	0.73645	1	102157525
GO:0009832	plant-type cell wall biogenesis	biological_process	0.082309	0.73645	1	100624617
GO:0010215	cellulose microfibril organization	biological_process	0.082309	0.73645	1	100624617
GO:0018106	peptidyl-histidine phosphorylation	biological_process	0.082309	0.73645	1	100621029
GO:0018202	peptidyl-histidine modification	biological_process	0.082309	0.73645	1	100621029
GO:0030193	regulation of blood coagulation	biological_process	0.082309	0.73645	1	100621029
GO:0031252	cell leading edge	cellular_component	0.082309	0.73645	1	100156660
GO:0042113	B cell activation	biological_process	0.082309	0.73645	1	100627864
GO:0043752	adenosylcobinamide kinase activity	molecular_function	0.082309	0.73645	1	100627191
GO:0044456	synapse part	cellular_component	0.082309	0.73645	1	100627254
GO:0048786	presynaptic active zone	cellular_component	0.082309	0.73645	1	100627254
GO:0050818	regulation of coagulation	biological_process	0.082309	0.73645	1	100621029
GO:0061041	regulation of wound healing	biological_process	0.082309	0.73645	1	100621029
GO:0070726	cell wall assembly	biological_process	0.082309	0.73645	1	100624617
GO:0071668	plant-type cell wall assembly	biological_process	0.082309	0.73645	1	100624617
GO:0097458	neuron part	cellular_component	0.082309	0.73645	1	100627254
GO:0098793	presynapse	cellular_component	0.082309	0.73645	1	100627254
GO:1900046	regulation of hemostasis	biological_process	0.082309	0.73645	1	100621029
GO:1903034	regulation of response to wounding	biological_process	0.082309	0.73645	1	100621029
GO:0009126	purine nucleoside monophosphate metabolic process	biological_process	0.082976	0.73964	12	1.00622e+107
GO:0009167	purine ribonucleoside monophosphate metabolic process	biological_process	0.082976	0.73964	12	1.0052e+107
GO:0000003	reproduction	biological_process	0.084139	0.7486	21	1.10256e+179
GO:0034062	RNA polymerase activity	molecular_function	0.084716	0.7516	20	1.10257e+179
GO:0005732	small nucleolar ribonucleoprotein complex	cellular_component	0.085783	0.7516	3	1.1026e+26
GO:0009401	phosphoenolpyruvate-dependent sugar phosphotransferase system	biological_process	0.085783	0.7516	3	1.00737e+26
GO:0004970	ionotropic glutamate receptor activity	molecular_function	0.086028	0.7516	4	1.00737e+35
GO:0008066	glutamate receptor activity	molecular_function	0.086028	0.7516	4	1.0052e+35
GO:0033178	proton-transporting two-sector ATPase complex, catalytic domain	cellular_component	0.086255	0.7516	6	1.02162e+53
GO:0000062	fatty-acyl-CoA binding	molecular_function	0.088144	0.7516	2	1.00511e+17
GO:0001765	membrane raft assembly	biological_process	0.088144	0.7516	2	404693100125375
GO:0004016	adenylate cyclase activity	molecular_function	0.088144	0.7516	2	1.00621e+17
GO:0006171	cAMP biosynthetic process	biological_process	0.088144	0.7516	2	1.00621e+17
GO:0006555	methionine metabolic process	biological_process	0.088144	0.7516	2	1.02158e+17
GO:0006730	one-carbon metabolic process	biological_process	0.088144	0.7516	2	1.00521e+17
GO:0006848	pyruvate transport	biological_process	0.088144	0.7516	2	1.00523e+17
GO:0006850	mitochondrial pyruvate transport	biological_process	0.088144	0.7516	2	1.10261e+17
GO:0016863	intramolecular oxidoreductase activity, transposing C=C bonds	molecular_function	0.088144	0.7516	2	1.00522e+17
GO:0031579	membrane raft organization	biological_process	0.088144	0.7516	2	404693100125375
GO:0032786	positive regulation of DNA-templated transcription, elongation	biological_process	0.088144	0.7516	2	1.10258e+17
GO:0032968	positive regulation of transcription elongation from RNA polymerase II promoter	biological_process	0.088144	0.7516	2	1.10258e+17
GO:0034243	regulation of transcription elongation from RNA polymerase II promoter	biological_process	0.088144	0.7516	2	1.10258e+17
GO:0044854	plasma membrane raft assembly	biological_process	0.088144	0.7516	2	100125375404693
GO:0044857	plasma membrane raft organization	biological_process	0.088144	0.7516	2	100125375404693
GO:0047750	cholestenol delta-isomerase activity	molecular_function	0.088144	0.7516	2	1.00522e+17
GO:0070836	caveola assembly	biological_process	0.088144	0.7516	2	404693100125375
GO:0009161	ribonucleoside monophosphate metabolic process	biological_process	0.088265	0.7516	12	1.00153e+107
GO:0006461	protein complex assembly	biological_process	0.088434	0.75169	30	100516229,100286811,100516526,100512382,100627965,100736655,396904,100515246,100170769,100626722,100521067,100520606,100157034,100518487,100518839,100738346,100514526,100525195,100738753,102160785,100511985,654416,396903,102164234,102165390,100511412,110260977,100519379,100624617,397628
GO:0004527	exonuclease activity	molecular_function	0.088681	0.75245	11	1.00516e+92
GO:0070271	protein complex biogenesis	biological_process	0.089963	0.76196	30	100624617,397628,110260977,100519379,654416,396903,100511985,102165390,102164234,100511412,102160785,100738753,100518839,100518487,100738346,100514526,100525195,100170769,100626722,100521067,100520606,100157034,100736655,100515246,396904,100516229,100286811,100516526,100512382,100627965
GO:0007281	germ cell development	biological_process	0.090716	0.76518	6	1.10256e+50
GO:0008643	carbohydrate transport	biological_process	0.090763	0.76518	5	1.00513e+44
GO:0004222	metalloendopeptidase activity	molecular_function	0.090986	0.76518	12	1.00158e+107
GO:0051128	regulation of cellular component organization	biological_process	0.090986	0.76518	12	3.96903e+104
GO:0048519	negative regulation of biological process	biological_process	0.091628	0.76922	18	1.00625e+155
GO:0007029	endoplasmic reticulum organization	biological_process	0.092321	0.77024	4	1.00515e+32
GO:0016569	covalent chromatin modification	biological_process	0.092321	0.77024	4	1.10258e+32
GO:0016570	histone modification	biological_process	0.092321	0.77024	4	1.00516e+32
GO:0008138	protein tyrosine/serine/threonine phosphatase activity	molecular_function	0.092397	0.77024	7	1.00154e+62
GO:0019082	viral protein processing	biological_process	0.094078	0.7788	3	1.00154e+26
GO:0044781	bacterial-type flagellum organization	biological_process	0.094078	0.7788	3	1.00626e+26
GO:0045261	proton-transporting ATP synthase complex, catalytic core F(1)	cellular_component	0.094078	0.7788	3	1.02165e+26
GO:0055036	virion membrane	cellular_component	0.094078	0.7788	3	1.0651e+26
GO:0008380	RNA splicing	biological_process	0.095301	0.78755	6	1.00338e+50
GO:0004190	aspartic-type endopeptidase activity	molecular_function	0.097917	0.80566	10	1.00152e+86
GO:0070001	aspartic-type peptidase activity	molecular_function	0.097917	0.80566	10	1.00521e+86
GO:0003707	steroid hormone receptor activity	molecular_function	0.098825	0.80566	4	1.00156e+35
GO:0006497	protein lipidation	biological_process	0.098825	0.80566	4	1.00522e+32
GO:0006506	GPI anchor biosynthetic process	biological_process	0.098825	0.80566	4	3.97488e+32
GO:0006661	phosphatidylinositol biosynthetic process	biological_process	0.098825	0.80566	4	1.00158e+32
GO:0043624	cellular protein complex disassembly	biological_process	0.098825	0.80566	4	1.00525e+35
GO:0003924	GTPase activity	molecular_function	0.099563	0.80566	21	1.00144e+185
GO:0040007	growth	biological_process	0.10001	0.80566	6	1.1026e+50
GO:0044448	cell cortex part	cellular_component	0.10072	0.80566	7	1.00153e+59
GO:0000394	RNA splicing, via endonucleolytic cleavage and ligation	biological_process	0.10136	0.80566	2	1.00338e+17
GO:0003964	RNA-directed DNA polymerase activity	molecular_function	0.10136	0.80566	2	492280100522294
GO:0004402	histone acetyltransferase activity	molecular_function	0.10136	0.80566	2	1.00737e+17
GO:0006032	chitin catabolic process	biological_process	0.10136	0.80566	2	1.00624e+17
GO:0006072	glycerol-3-phosphate metabolic process	biological_process	0.10136	0.80566	2	100153250396914
GO:0006388	tRNA splicing, via endonucleolytic cleavage and ligation	biological_process	0.10136	0.80566	2	1.00338e+17
GO:0044091	membrane biogenesis	biological_process	0.10136	0.80566	2	100125375404693
GO:0046058	cAMP metabolic process	biological_process	0.10136	0.80566	2	1.00621e+17
GO:0046168	glycerol-3-phosphate catabolic process	biological_process	0.10136	0.80566	2	396914100153250
GO:0046348	amino sugar catabolic process	biological_process	0.10136	0.80566	2	1.00624e+17
GO:0071709	membrane assembly	biological_process	0.10136	0.80566	2	404693100125375
GO:1901072	glucosamine-containing compound catabolic process	biological_process	0.10136	0.80566	2	1.00624e+17
GO:1902495	transmembrane transporter complex	cellular_component	0.10155	0.80566	5	1.00154e+44
GO:1990351	transporter complex	cellular_component	0.10155	0.80566	5	1.00153e+44
GO:0007155	cell adhesion	biological_process	0.1023	0.80683	22	1.00513e+185
GO:0009144	purine nucleoside triphosphate metabolic process	biological_process	0.10238	0.80683	12	1.00622e+107
GO:0009199	ribonucleoside triphosphate metabolic process	biological_process	0.10238	0.80683	12	1.02162e+107
GO:0009205	purine ribonucleoside triphosphate metabolic process	biological_process	0.10238	0.80683	12	1.00153e+107
GO:0070566	adenylyltransferase activity	molecular_function	0.10269	0.80792	3	1.00622e+26
GO:0005262	calcium channel activity	molecular_function	0.10483	0.8195	6	1.00155e+50
GO:0016410	N-acyltransferase activity	molecular_function	0.10483	0.8195	6	1.00144e+53
GO:0034470	ncRNA processing	biological_process	0.10492	0.8195	18	1.00157e+161
GO:0009123	nucleoside monophosphate metabolic process	biological_process	0.10535	0.8195	12	1.00622e+107
GO:0005496	steroid binding	molecular_function	0.10554	0.8195	4	1.10256e+35
GO:0005516	calmodulin binding	molecular_function	0.10554	0.8195	4	1.00626e+35
GO:0015370	solute:sodium symporter activity	molecular_function	0.10554	0.8195	4	1.00517e+35
GO:0042158	lipoprotein biosynthetic process	biological_process	0.10554	0.8195	4	1.00158e+32
GO:0055086	nucleobase-containing small molecule metabolic process	biological_process	0.10578	0.82008	21	1.00156e+188
GO:0006754	ATP biosynthetic process	biological_process	0.10943	0.83275	7	1.00737e+62
GO:0033176	proton-transporting V-type ATPase complex	cellular_component	0.10978	0.83275	6	1.00287e+50
GO:0003774	motor activity	molecular_function	0.11142	0.83275	10	1.00516e+80
GO:0051015	actin filament binding	molecular_function	0.1116	0.83275	3	1.00525e+26
GO:0032787	monocarboxylic acid metabolic process	biological_process	0.11199	0.83275	9	1.00514e+74
GO:0016829	lyase activity	molecular_function	0.11224	0.83275	21	1.00519e+188
GO:0003896	DNA primase activity	molecular_function	0.11245	0.83275	4	1.00739e+35
GO:0005217	intracellular ligand-gated ion channel activity	molecular_function	0.11245	0.83275	4	1.00515e+32
GO:0005218	intracellular ligand-gated calcium channel activity	molecular_function	0.11245	0.83275	4	1.00521e+32
GO:0005219	ryanodine-sensitive calcium-release channel activity	molecular_function	0.11245	0.83275	4	3.96718e+32
GO:0006401	RNA catabolic process	biological_process	0.11245	0.83275	4	1.00737e+35
GO:0015278	calcium-release channel activity	molecular_function	0.11245	0.83275	4	1.00521e+32
GO:0006022	aminoglycan metabolic process	biological_process	0.11295	0.83275	5	1.00624e+44
GO:0051287	NAD binding	molecular_function	0.11393	0.83275	7	1.00153e+59
GO:0030234	enzyme regulator activity	molecular_function	0.1142	0.83275	28	397453,595126,100322894,100625238,100513350,100522463,100034246,110260229,100156351,110258080,100158048,100513827,100158102,100516911,100621808,100154530,100515404,100514069,100515264,106509950,100521238,100518487,100101552,100620812,100154830,100152157,100525506,100521067
GO:0018022	peptidyl-lysine methylation	biological_process	0.11508	0.83275	2	110258080767626
GO:0030151	molybdenum ion binding	molecular_function	0.11508	0.83275	2	1.00154e+17
GO:0034968	histone lysine methylation	biological_process	0.11508	0.83275	2	767626110258080
GO:0004553	hydrolase activity, hydrolyzing O-glycosyl compounds	molecular_function	0.11509	0.83275	13	1.00511e+116
GO:0042278	purine nucleoside metabolic process	biological_process	0.11509	0.83275	13	1.0052e+116
GO:0046128	purine ribonucleoside metabolic process	biological_process	0.11509	0.83275	13	1.0052e+116
GO:0033177	proton-transporting two-sector ATPase complex, proton-transporting domain	cellular_component	0.11564	0.83275	8	1.0651e+68
GO:0034061	DNA polymerase activity	molecular_function	0.1158	0.83275	9	1.00521e+74
GO:0005783	endoplasmic reticulum	cellular_component	0.11687	0.83275	18	1.10259e+155
GO:0009141	nucleoside triphosphate metabolic process	biological_process	0.11776	0.83275	12	1.1026e+107
GO:0044707	single-multicellular organism process	biological_process	0.11843	0.83275	38	100217389,397533,100037301,100620481,100519030,100516124,397628,110255474,100154222,100519603,100519724,100626722,100525601,100518487,100514019,100621029,397323,100521775,100515246,100158048,100523504,100524201,102162152,396903,100322894,100516268,100524762,102159686,100511412,100153556,102159363,100522743,407247,100101552,100521138,100514374,100515547,100736655
GO:0008982	protein-N(PI)-phosphohistidine-sugar phosphotransferase activity	molecular_function	0.11887	0.83275	5	1.00513e+44
GO:0046983	protein dimerization activity	molecular_function	0.11894	0.83275	21	1.00522e+182
GO:0004673	protein histidine kinase activity	molecular_function	0.11956	0.83275	4	1.00621e+35
GO:0016775	phosphotransferase activity, nitrogenous group as acceptor	molecular_function	0.11956	0.83275	4	1.00516e+35
GO:0046474	glycerophospholipid biosynthetic process	biological_process	0.11956	0.83275	4	1.00158e+32
GO:0000702	oxidized base lesion DNA N-glycosylase activity	molecular_function	0.12089	0.83275	1	100514820
GO:0001000	bacterial-type RNA polymerase core enzyme binding	molecular_function	0.12089	0.83275	1	100622925
GO:0003727	single-stranded RNA binding	molecular_function	0.12089	0.83275	1	100522528
GO:0003872	6-phosphofructokinase activity	molecular_function	0.12089	0.83275	1	100521394
GO:0003994	aconitate hydratase activity	molecular_function	0.12089	0.83275	1	100626582
GO:0004019	adenylosuccinate synthase activity	molecular_function	0.12089	0.83275	1	100048943
GO:0004512	inositol-3-phosphate synthase activity	molecular_function	0.12089	0.83275	1	102164826
GO:0004984	olfactory receptor activity	molecular_function	0.12089	0.83275	1	100519603
GO:0006011	UDP-glucose metabolic process	biological_process	0.12089	0.83275	1	100625330
GO:0006021	inositol biosynthetic process	biological_process	0.12089	0.83275	1	102164826
GO:0006047	UDP-N-acetylglucosamine metabolic process	biological_process	0.12089	0.83275	1	100155583
GO:0006569	tryptophan catabolic process	biological_process	0.12089	0.83275	1	100513419
GO:0008534	oxidized purine nucleobase lesion DNA N-glycosylase activity	molecular_function	0.12089	0.83275	1	100514820
GO:0008770	[acyl-carrier-protein] phosphodiesterase activity	molecular_function	0.12089	0.83275	1	102167043
GO:0009310	amine catabolic process	biological_process	0.12089	0.83275	1	100513419
GO:0012502	induction of programmed cell death	biological_process	0.12089	0.83275	1	100153595
GO:0018759	methenyltetrahydromethanopterin cyclohydrolase activity	molecular_function	0.12089	0.83275	1	100620470
GO:0019051	induction by virus of host apoptotic process	biological_process	0.12089	0.83275	1	100153595
GO:0019441	tryptophan catabolic process to kynurenine	biological_process	0.12089	0.83275	1	100513419
GO:0021549	cerebellum development	biological_process	0.12089	0.83275	1	100524201
GO:0022037	metencephalon development	biological_process	0.12089	0.83275	1	100524201
GO:0030158	protein xylosyltransferase activity	molecular_function	0.12089	0.83275	1	100514160
GO:0030198	extracellular matrix organization	biological_process	0.12089	0.83275	1	100624617
GO:0030570	pectate lyase activity	molecular_function	0.12089	0.83275	1	100153522
GO:0030902	hindbrain development	biological_process	0.12089	0.83275	1	100524201
GO:0031342	negative regulation of cell killing	biological_process	0.12089	0.83275	1	100511893
GO:0031343	positive regulation of cell killing	biological_process	0.12089	0.83275	1	100153595
GO:0035252	UDP-xylosyltransferase activity	molecular_function	0.12089	0.83275	1	100514160
GO:0042285	xylosyltransferase activity	molecular_function	0.12089	0.83275	1	100514160
GO:0042402	cellular biogenic amine catabolic process	biological_process	0.12089	0.83275	1	100513419
GO:0042436	indole-containing compound catabolic process	biological_process	0.12089	0.83275	1	100513419
GO:0043062	extracellular structure organization	biological_process	0.12089	0.83275	1	100624617
GO:0043175	RNA polymerase core enzyme binding	molecular_function	0.12089	0.83275	1	100622925
GO:0043902	positive regulation of multi-organism process	biological_process	0.12089	0.83275	1	100153595
GO:0044533	positive regulation of apoptotic process in other organism	biological_process	0.12089	0.83275	1	100153595
GO:0046173	polyol biosynthetic process	biological_process	0.12089	0.83275	1	102164826
GO:0046218	indolalkylamine catabolic process	biological_process	0.12089	0.83275	1	100513419
GO:0051709	regulation of killing of cells of other organism	biological_process	0.12089	0.83275	1	100153595
GO:0051712	positive regulation of killing of cells of other organism	biological_process	0.12089	0.83275	1	100153595
GO:0052042	positive regulation by symbiont of host programmed cell death	biological_process	0.12089	0.83275	1	100153595
GO:0052151	positive regulation by symbiont of host apoptotic process	biological_process	0.12089	0.83275	1	100153595
GO:0052330	positive regulation by organism of programmed cell death in other organism involved in symbiotic interaction	biological_process	0.12089	0.83275	1	100153595
GO:0052501	positive regulation by organism of apoptotic process in other organism involved in symbiotic interaction	biological_process	0.12089	0.83275	1	100153595
GO:0060139	positive regulation of apoptotic process by virus	biological_process	0.12089	0.83275	1	100153595
GO:0070063	RNA polymerase binding	molecular_function	0.12089	0.83275	1	100622925
GO:0070189	kynurenine metabolic process	biological_process	0.12089	0.83275	1	100513419
GO:0030246	carbohydrate binding	molecular_function	0.12322	0.84758	7	1.02159e+62
GO:0002064	epithelial cell development	biological_process	0.12494	0.84835	5	7.33643e+41
GO:0002065	columnar/cuboidal epithelial cell differentiation	biological_process	0.12494	0.84835	5	7.33643e+41
GO:0002066	columnar/cuboidal epithelial cell development	biological_process	0.12494	0.84835	5	1.00152e+41
GO:0005213	structural constituent of chorion	molecular_function	0.12494	0.84835	5	1.02165e+41
GO:0007292	female gamete generation	biological_process	0.12494	0.84835	5	7.33643e+41
GO:0007304	chorion-containing eggshell formation	biological_process	0.12494	0.84835	5	1.10256e+41
GO:0030703	eggshell formation	biological_process	0.12494	0.84835	5	1.10256e+41
GO:0030707	ovarian follicle cell development	biological_process	0.12494	0.84835	5	7.33643e+41
GO:0048477	oogenesis	biological_process	0.12494	0.84835	5	1.10256e+41
GO:0018193	peptidyl-amino acid modification	biological_process	0.12531	0.84968	6	1.00621e+50
GO:0048523	negative regulation of cellular process	biological_process	0.12596	0.85159	15	1.00157e+128
GO:0006633	fatty acid biosynthetic process	biological_process	0.12685	0.85159	4	1.00513e+35
GO:0006874	cellular calcium ion homeostasis	biological_process	0.12685	0.85159	4	3.96718e+32
GO:0055074	calcium ion homeostasis	biological_process	0.12685	0.85159	4	1.00521e+32
GO:0072503	cellular divalent inorganic cation homeostasis	biological_process	0.12685	0.85159	4	1.00521e+32
GO:0072507	divalent inorganic cation homeostasis	biological_process	0.12685	0.85159	4	1.00515e+32
GO:0031514	motile cilium	cellular_component	0.12801	0.85159	7	1.00628e+56
GO:0065003	macromolecular complex assembly	biological_process	0.12812	0.85159	30	100515246,396904,100736655,100516229,100512382,100627965,100516526,100286811,100514526,100738346,100518487,100518839,100525195,100521067,100626722,100170769,100157034,100520606,100511985,654416,396903,100511412,102164234,102165390,102160785,100738753,100624617,397628,110260977,100519379
GO:0042626	ATPase activity, coupled to transmembrane movement of substances	molecular_function	0.1285	0.85159	8	1.00625e+65
GO:0043492	ATPase activity, coupled to movement of substances	molecular_function	0.1285	0.85159	8	1.00625e+65
GO:0000045	autophagosome assembly	biological_process	0.12924	0.85159	2	1.00323e+17
GO:0001897	cytolysis by symbiont of host cells	biological_process	0.12924	0.85159	2	1.00622e+17
GO:0004511	tyrosine 3-monooxygenase activity	molecular_function	0.12924	0.85159	2	1.00621e+17
GO:0004714	transmembrane receptor protein tyrosine kinase activity	molecular_function	0.12924	0.85159	2	397070100155702
GO:0016236	macroautophagy	biological_process	0.12924	0.85159	2	1.00622e+17
GO:0016725	oxidoreductase activity, acting on CH or CH2 groups	molecular_function	0.12924	0.85159	2	1.00515e+17
GO:0019836	hemolysis by symbiont of host erythrocytes	biological_process	0.12924	0.85159	2	1.00526e+17
GO:0032065	cortical protein anchoring	biological_process	0.12924	0.85159	2	1.00521e+17
GO:0032784	regulation of DNA-templated transcription, elongation	biological_process	0.12924	0.85159	2	1.00525e+17
GO:0045944	positive regulation of transcription from RNA polymerase II promoter	biological_process	0.12924	0.85159	2	1.00525e+17
GO:0061695	transferase complex, transferring phosphorus-containing groups	cellular_component	0.1297	0.85159	10	1.00516e+86
GO:0008237	metallopeptidase activity	molecular_function	0.12992	0.85159	14	1.00158e+125
GO:0004659	prenyltransferase activity	molecular_function	0.13024	0.85159	3	1.0052e+26
GO:0005186	pheromone activity	molecular_function	0.13024	0.85159	3	1.00519e+26
GO:0009236	cobalamin biosynthetic process	biological_process	0.13024	0.85159	3	1.00513e+26
GO:0045087	innate immune response	biological_process	0.13024	0.85159	3	1.00514e+26
GO:0032879	regulation of localization	biological_process	0.13071	0.85159	6	1.00037e+53
GO:0045259	proton-transporting ATP synthase complex	cellular_component	0.13071	0.85159	6	1.0052e+53
GO:0072509	divalent inorganic cation transmembrane transporter activity	molecular_function	0.13097	0.85159	12	3.96718e+101
GO:0016568	chromatin modification	biological_process	0.13114	0.85159	5	1.00516e+41
GO:0072686	mitotic spindle	cellular_component	0.13114	0.85159	5	1.00157e+44
GO:0072511	divalent inorganic cation transport	biological_process	0.13354	0.866	10	1.00515e+83
GO:0000278	mitotic cell cycle	biological_process	0.13391	0.86603	13	1.02162e+110
GO:1903047	mitotic cell cycle process	biological_process	0.13391	0.86603	13	1.00737e+110
GO:0051240	positive regulation of multicellular organismal process	biological_process	0.13433	0.86756	4	1.00158e+35
GO:0071822	protein complex subunit organization	biological_process	0.13687	0.88281	31	100518487,100518839,100738346,100514526,100525195,100170769,100521067,100626722,100520606,100157034,100736655,100515246,396904,100516229,100286811,100516526,100627965,100512382,100624617,397628,110260977,100519379,654416,396903,100511985,102165390,102164234,100511412,100154500,102160785,100738753
GO:0005753	mitochondrial proton-transporting ATP synthase complex	cellular_component	0.13748	0.88312	5	1.02162e+44
GO:0030855	epithelial cell differentiation	biological_process	0.13748	0.88312	5	1.02165e+41
GO:0045934	negative regulation of nucleobase-containing compound metabolic process	biological_process	0.13748	0.88312	5	1.00523e+44
GO:0003899	DNA-directed RNA polymerase activity	molecular_function	0.13781	0.88409	15	1.00049e+134
GO:0022610	biological adhesion	biological_process	0.14015	0.89785	22	1.00514e+185
GO:0048609	multicellular organismal reproductive process	biological_process	0.1414	0.8999	10	1.02165e+83
GO:0022412	cellular process involved in reproduction in multicellular organism	biological_process	0.14185	0.8999	6	1.00516e+50
GO:0009127	purine nucleoside monophosphate biosynthetic process	biological_process	0.14291	0.8999	7	1.00737e+62
GO:0009168	purine ribonucleoside monophosphate biosynthetic process	biological_process	0.14291	0.8999	7	1.02165e+62
GO:0001518	voltage-gated sodium channel complex	cellular_component	0.14377	0.8999	2	1.00518e+17
GO:0005086	ARF guanyl-nucleotide exchange factor activity	molecular_function	0.14377	0.8999	2	1.0052e+17
GO:0005248	voltage-gated sodium channel activity	molecular_function	0.14377	0.8999	2	1.00153e+17
GO:0016571	histone methylation	biological_process	0.14377	0.8999	2	110258080767626
GO:0030173	integral component of Golgi membrane	cellular_component	0.14377	0.8999	2	1.00158e+17
GO:0031228	intrinsic component of Golgi membrane	cellular_component	0.14377	0.8999	2	1.00628e+17
GO:0032011	ARF protein signal transduction	biological_process	0.14377	0.8999	2	1.0052e+17
GO:0032012	regulation of ARF protein signal transduction	biological_process	0.14377	0.8999	2	1.00516e+17
GO:0034706	sodium channel complex	cellular_component	0.14377	0.8999	2	1.00518e+17
GO:0052646	alditol phosphate metabolic process	biological_process	0.14377	0.8999	2	396914100153250
GO:0007049	cell cycle	biological_process	0.14539	0.8999	29	100154500,100623801,397316,100523302,396903,654416,100524645,100157054,100520585,397628,100520199,110260205,100512018,100737191,100627965,110261676,100626940,102157652,102162297,100521238,100736655,100515547,100627548,100521067,100170769,100519135,110257406,100737017,100518487
GO:0016820	hydrolase activity, acting on acid anhydrides, catalyzing transmembrane movement of substances	molecular_function	0.14949	0.8999	10	1.02162e+83
GO:1901136	carbohydrate derivative catabolic process	biological_process	0.1498	0.8999	4	1.00624e+32
GO:0004177	aminopeptidase activity	molecular_function	0.14989	0.8999	3	1.00516e+26
GO:0006040	amino sugar metabolic process	biological_process	0.14989	0.8999	3	1.00624e+26
GO:0034702	ion channel complex	cellular_component	0.14989	0.8999	3	1.00153e+26
GO:0034703	cation channel complex	cellular_component	0.14989	0.8999	3	1.00153e+26
GO:0015399	primary active transmembrane transporter activity	molecular_function	0.15151	0.8999	8	3.9691e+65
GO:0015405	P-P-bond-hydrolysis-driven transmembrane transporter activity	molecular_function	0.15151	0.8999	8	1.00526e+65
GO:0009156	ribonucleoside monophosphate biosynthetic process	biological_process	0.15329	0.8999	7	1.00154e+62
GO:0051239	regulation of multicellular organismal process	biological_process	0.15329	0.8999	7	1.00158e+62
GO:0043093	FtsZ-dependent cytokinesis	biological_process	0.1534	0.8999	6	1.00519e+50
GO:0006470	protein dephosphorylation	biological_process	0.15633	0.8999	8	1.00625e+71
GO:0007610	behavior	biological_process	0.15727	0.8999	5	1.00623e+44
GO:1901615	organic hydroxy compound metabolic process	biological_process	0.15778	0.8999	4	1.00621e+35
GO:0000148	1,3-beta-D-glucan synthase complex	cellular_component	0.15785	0.8999	1	100515873
GO:0000176	nuclear exosome (RNase complex)	cellular_component	0.15785	0.8999	1	100152816
GO:0002218	activation of innate immune response	biological_process	0.15785	0.8999	1	100217389
GO:0003843	1,3-beta-D-glucan synthase activity	molecular_function	0.15785	0.8999	1	100515873
GO:0004308	exo-alpha-sialidase activity	molecular_function	0.15785	0.8999	1	106509839
GO:0004318	enoyl-[acyl-carrier-protein] reductase (NADH) activity	molecular_function	0.15785	0.8999	1	100524569
GO:0005788	endoplasmic reticulum lumen	cellular_component	0.15785	0.8999	1	110259433
GO:0005869	dynactin complex	cellular_component	0.15785	0.8999	1	100738835
GO:0006020	inositol metabolic process	biological_process	0.15785	0.8999	1	102164826
GO:0006074	(1->3)-beta-D-glucan metabolic process	biological_process	0.15785	0.8999	1	100515873
GO:0006075	(1->3)-beta-D-glucan biosynthetic process	biological_process	0.15785	0.8999	1	100515873
GO:0007417	central nervous system development	biological_process	0.15785	0.8999	1	100524201
GO:0007420	brain development	biological_process	0.15785	0.8999	1	100524201
GO:0007608	sensory perception of smell	biological_process	0.15785	0.8999	1	100519603
GO:0007622	rhythmic behavior	biological_process	0.15785	0.8999	1	100621314
GO:0009015	N-succinylarginine dihydrolase activity	molecular_function	0.15785	0.8999	1	102161705
GO:0009664	plant-type cell wall organization	biological_process	0.15785	0.8999	1	100624617
GO:0015321	sodium-dependent phosphate transmembrane transporter activity	molecular_function	0.15785	0.8999	1	641343
GO:0016499	orexin receptor activity	molecular_function	0.15785	0.8999	1	100621314
GO:0016774	phosphotransferase activity, carboxyl group as acceptor	molecular_function	0.15785	0.8999	1	100738420
GO:0016872	intramolecular lyase activity	molecular_function	0.15785	0.8999	1	102164826
GO:0016997	alpha-sialidase activity	molecular_function	0.15785	0.8999	1	106509839
GO:0018836	alkylmercury lyase activity	molecular_function	0.15785	0.8999	1	110256111
GO:0018941	organomercury metabolic process	biological_process	0.15785	0.8999	1	110256111
GO:0018942	organometal metabolic process	biological_process	0.15785	0.8999	1	110256111
GO:0022410	circadian sleep/wake cycle process	biological_process	0.15785	0.8999	1	100621314
GO:0030472	mitotic spindle organization in nucleus	biological_process	0.15785	0.8999	1	100154500
GO:0031349	positive regulation of defense response	biological_process	0.15785	0.8999	1	100217389
GO:0032479	regulation of type I interferon production	biological_process	0.15785	0.8999	1	100217389
GO:0032481	positive regulation of type I interferon production	biological_process	0.15785	0.8999	1	100217389
GO:0032606	type I interferon production	biological_process	0.15785	0.8999	1	100217389
GO:0042745	circadian sleep/wake cycle	biological_process	0.15785	0.8999	1	100621314
GO:0042752	regulation of circadian rhythm	biological_process	0.15785	0.8999	1	100512733
GO:0042754	negative regulation of circadian rhythm	biological_process	0.15785	0.8999	1	100512733
GO:0043158	heterocyst differentiation	biological_process	0.15785	0.8999	1	100513495
GO:0044163	host cytoskeleton	cellular_component	0.15785	0.8999	1	100524645
GO:0044341	sodium-dependent phosphate transport	biological_process	0.15785	0.8999	1	641343
GO:0045089	positive regulation of innate immune response	biological_process	0.15785	0.8999	1	100217389
GO:0046413	organomercury catabolic process	biological_process	0.15785	0.8999	1	110256111
GO:0046999	regulation of conjugation	biological_process	0.15785	0.8999	1	445520
GO:0048512	circadian behavior	biological_process	0.15785	0.8999	1	100621314
GO:0050708	regulation of protein secretion	biological_process	0.15785	0.8999	1	100620926
GO:0050795	regulation of behavior	biological_process	0.15785	0.8999	1	100152324
GO:0050920	regulation of chemotaxis	biological_process	0.15785	0.8999	1	100152324
GO:0051046	regulation of secretion	biological_process	0.15785	0.8999	1	100620926
GO:0060322	head development	biological_process	0.15785	0.8999	1	100524201
GO:0071669	plant-type cell wall organization or biogenesis	biological_process	0.15785	0.8999	1	100624617
GO:0075519	microtubule-dependent intracellular transport of viral material	biological_process	0.15785	0.8999	1	100524645
GO:0075521	microtubule-dependent intracellular transport of viral material towards nucleus	biological_process	0.15785	0.8999	1	100524645
GO:0075606	transport of viral material towards nucleus	biological_process	0.15785	0.8999	1	100524645
GO:1903530	regulation of secretion by cell	biological_process	0.15785	0.8999	1	100620926
GO:0009119	ribonucleoside metabolic process	biological_process	0.15788	0.8999	13	1.0052e+116
GO:0004535	poly(A)-specific ribonuclease activity	molecular_function	0.15862	0.8999	2	1.00737e+17
GO:0005158	insulin receptor binding	molecular_function	0.15862	0.8999	2	1.10256e+17
GO:0005942	phosphatidylinositol 3-kinase complex	cellular_component	0.15862	0.8999	2	1.00152e+17
GO:0005944	phosphatidylinositol 3-kinase complex, class IB	cellular_component	0.15862	0.8999	2	1.00152e+17
GO:0006099	tricarboxylic acid cycle	biological_process	0.15862	0.8999	2	1.00519e+17
GO:0006101	citrate metabolic process	biological_process	0.15862	0.8999	2	1.00627e+17
GO:0007131	reciprocal meiotic recombination	biological_process	0.15862	0.8999	2	1.00512e+17
GO:0032101	regulation of response to external stimulus	biological_process	0.15862	0.8999	2	1.00152e+17
GO:0034457	Mpp10 complex	cellular_component	0.15862	0.8999	2	1.00521e+17
GO:0035014	phosphatidylinositol 3-kinase regulator activity	molecular_function	0.15862	0.8999	2	1.00152e+17
GO:0035825	reciprocal DNA recombination	biological_process	0.15862	0.8999	2	1.00512e+17
GO:0046935	1-phosphatidylinositol-3-kinase regulator activity	molecular_function	0.15862	0.8999	2	1.00034e+17
GO:0051801	cytolysis in other organism involved in symbiotic interaction	biological_process	0.15862	0.8999	2	1.00526e+17
GO:0052331	hemolysis in other organism involved in symbiotic interaction	biological_process	0.15862	0.8999	2	1.00622e+17
GO:0097651	phosphatidylinositol 3-kinase complex, class I	cellular_component	0.15862	0.8999	2	1.00152e+17
GO:0032505	reproduction of a single-celled organism	biological_process	0.15933	0.90288	6	1.00171e+50
GO:0008544	epidermis development	biological_process	0.16005	0.90482	3	1.00518e+26
GO:0043248	proteasome assembly	biological_process	0.16005	0.90482	3	1.00625e+26
GO:0005102	receptor binding	molecular_function	0.16081	0.90802	41	100516268,100322894,396903,100739797,100621009,100511556,100519127,100620374,397078,100621167,100623287,100736655,100737226,100523621,100516229,100156660,100518839,102161705,100524361,396891,100286741,100518441,100623827,100157399,100153052,100153049,397628,100155536,106508998,100524352,100620286,100738902,100515246,110259216,110260254,100523671,110255858,100518487,396916,100626722,100126236
GO:0034660	ncRNA metabolic process	biological_process	0.16137	0.9101	21	1.00624e+185
[truncated: 1,653 more rows]

## Sheet: Table S7
Table S6 KEGG pathways enriched for DMR associated genes
#Term	ID	Gene number	P value	Corrected P value	Gene ID
[truncated: 2 more rows]

## Sheet: Table S8
	Table S8 Statistics for RNA-seq data of all samples
[truncated: 9 more rows]

[truncated: 6 more sheets: Table S9, Table S10, Table S11, Table S12, Table S13, Table S14]
